# Supplementary material for: Bis(pinacolato)diboron‐Enabled Ni‐Catalyzed Reductive Arylation/Vinylation of Alkyl Electrophiles
Source: PubMed Central journal article supplement (PMC11336967; doi:10.1002/advs.202404301), 2024-06-17

## Supporting Information

for *Adv. Sci.*, DOI 10.1002/adv.202404301

Bis(pinacolato)diboron-Enabled Ni-Catalyzed Reductive Arylation/Vinylation of Alkyl Electrophiles

*Deli Sun, Yuxin Gong, Yu Wu, Yunrong Chen\* and Hegui Gong\**

## Supporting Information

# **Bis(pinacolato)diboron-Enabled Ni-Catalyzed Reductive Arylation/Vinylation of Alkyl Electrophiles**

Deli Sun,<sup>[a],[†]</sup> Yuxin Gong,<sup>[b],[†]</sup> Yu Wu,<sup>[b]</sup> Yunrong Chen<sup>[b]\*</sup> and Hegui Gong<sup>[b]\*</sup>

<sup>[a]</sup>School of Resources and Environmental Engineering, Shanghai Polytechnic University, No. 2360 Jinhai Road, Shanghai 201209, China

<sup>[b]</sup>Center for Supramolecular Chemistry and Catalysis, College of Sciences, Shanghai University, No. 99 Shang-Da Road, Shanghai 200444, China

<sup>[†]</sup>These contributed equally.

Supporting Information Placeholder

### Table of Contents

|                                                                                       |     |
|---------------------------------------------------------------------------------------|-----|
| I. Experimental Section                                                               | S2  |
| Part 1. General Information                                                           | S2  |
| Part 2. Optimization Experiments                                                      | S2  |
| Part 3. Cross-Coupling Reactions and Product Characterization                         | S5  |
| Part 4. Homogeneous Reaction Conditions                                               | S32 |
| Part 5. Initial Test of a Three-Component Reaction of Alkyl Halide/Alkene/Aryl halide | S33 |
| Part 6. Mechanistic Consideration                                                     | S34 |
| Part 7. Kinetic Studies                                                               | S44 |
| II. Reference                                                                         | S55 |
| III. NMR Data                                                                         | S57 |

## **I. Experimental Section**

### **Part 1. General Information**

Commercial reagents were purchased from Adamas, Bide, Aldrich, Leyan, TCI and Energy Chemical.  $\text{NiBr}_2(\text{dtbbpy})$ ,<sup>1</sup>  $\text{NiCl}_2(\text{Py})_4$ ,<sup>2</sup> Katritzky pyridinium salts<sup>3</sup> and CEBO (2-chloro 3-ethylbenzoxazolium tetrafluoroborate)<sup>4</sup> was prepared according to literature procedures. THF was distilled under a nitrogen atmosphere from sodium-benzophenone. Column chromatography was performed using silica gel 200-300 mesh (purchased from Qingdao-Haiyang Co., China) as the solid support. All NMR spectra were recorded on JEOL (400 MHz) spectrometers and Bruker Avance (600 MHz) spectrometer at STP. Data for  $^1\text{H}$  NMR spectra are reported as follows: chemical shift ( $\delta$  ppm), multiplicity, coupling constant (Hz) and integration. NMR spectra are internally referenced to residual proton solvent signals (note:  $\text{CDCl}_3$  referenced at 7.26 ppm for  $^1\text{H}$  NMR and 77.0 ppm for  $^{13}\text{C}$  NMR). Coupling constants were reported in Hz, and multiplicity was indicated as follows: s (singlet); d (doublet); t (triplet); q (quartet); quint (quintet); m (multiplet); dd (doublet of doublets); ddd (doublet of doublet of doublets); dt (doublet of triplets); td (triplet of doublets). GC chromatograms were recorded on a GCMS-QP2010 SE (SHIMADZU) using an Agilent column CP7502 and Rxi-5 ms (Restek).

### **Part 2. Optimization experiments**

- 1. General procedure of optimization experiments:** To a flame-dried tube equipped with a stir bar was added the appropriate ligand,  $\text{B}_2\text{Pin}_2$  and methyl 4-bromobenzoate (21.5 mg, 0.1 mmol, 1.0 equiv). The tube was transferred into a  $\text{N}_2$ -filled glovebox, nickel catalyst, base and additives were added. The tube was sealed, removed from the glovebox and charged with the solvent. The mixture was stirred at 800 rpm, ensuring that the solid reagents were uniformly suspended. Then (3-bromopropyl)benzene (23.9 mg, 0.12 mmol, 1.2 equiv) was added to the tube with a syringe, the mixture was stirred vigorously (800 rpm) at 60 °C for 24 h. After that, the mixture was quenched with water (10 mL) and extracted with EtOAc (3 x 10 mL) and the combined organic layers were concentrated under reduced pressure. The residue was purified by column chromatography on silica

gel (eluted with 0-3% EtOAc/Petroleum ether) to give the target molecule, the yield was determined by <sup>1</sup>H NMR (using 2,5-dimethylfuran as the internal standard).

**Table S1. Optimization of the reaction conditions**

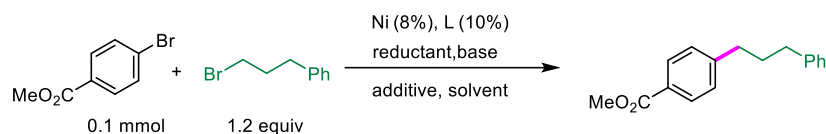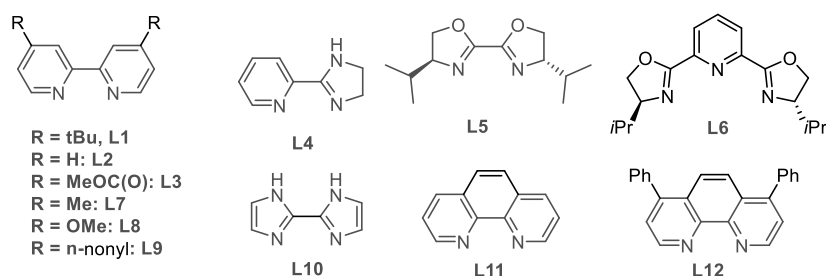

| Entry | Ligand | Nickel catalyst                     | Solvent | Additive (equiv.) | Base                           | Reductant                       | T(°C) | Yield% <sup>a</sup> |
|-------|--------|-------------------------------------|---------|-------------------|--------------------------------|---------------------------------|-------|---------------------|
| 1     | L1     | NiBr <sub>2</sub> (DME)             | DMA     | NaI               | K <sub>2</sub> CO <sub>3</sub> | B <sub>2</sub> Pin <sub>2</sub> | 60    | 96                  |
| 2     | L2     | NiBr <sub>2</sub> (DME)             | DMA     | NaI               | K <sub>2</sub> CO <sub>3</sub> | B <sub>2</sub> Pin <sub>2</sub> | 60    | 91                  |
| 3     | L3     | NiBr <sub>2</sub> (DME)             | DMA     | NaI               | K <sub>2</sub> CO <sub>3</sub> | B <sub>2</sub> Pin <sub>2</sub> | 60    | 19                  |
| 4     | L4     | NiBr <sub>2</sub> (DME)             | DMA     | NaI               | K <sub>2</sub> CO <sub>3</sub> | B <sub>2</sub> Pin <sub>2</sub> | 60    | 88                  |
| 5     | L5     | NiBr <sub>2</sub> (DME)             | DMA     | NaI               | K <sub>2</sub> CO <sub>3</sub> | B <sub>2</sub> Pin <sub>2</sub> | 60    | 14                  |
| 6     | L6     | NiBr <sub>2</sub> (DME)             | DMA     | NaI               | K <sub>2</sub> CO <sub>3</sub> | B <sub>2</sub> Pin <sub>2</sub> | 60    | 32                  |
| 7     | L7     | NiBr <sub>2</sub> (DME)             | DMA     | NaI               | K <sub>2</sub> CO <sub>3</sub> | B <sub>2</sub> Pin <sub>2</sub> | 60    | 94                  |
| 8     | L8     | NiBr <sub>2</sub> (DME)             | DMA     | NaI               | K <sub>2</sub> CO <sub>3</sub> | B <sub>2</sub> Pin <sub>2</sub> | 60    | 84                  |
| 9     | L9     | NiBr <sub>2</sub> (DME)             | DMA     | NaI               | K <sub>2</sub> CO <sub>3</sub> | B <sub>2</sub> Pin <sub>2</sub> | 60    | 95                  |
| 10    | L10    | NiBr <sub>2</sub> (DME)             | DMA     | NaI               | K <sub>2</sub> CO <sub>3</sub> | B <sub>2</sub> Pin <sub>2</sub> | 60    | 19                  |
| 11    | L11    | NiBr <sub>2</sub> (DME)             | DMA     | NaI               | K <sub>2</sub> CO <sub>3</sub> | B <sub>2</sub> Pin <sub>2</sub> | 60    | 89                  |
| 12    | L12    | NiBr <sub>2</sub> (DME)             | DMA     | NaI               | K <sub>2</sub> CO <sub>3</sub> | B <sub>2</sub> Pin <sub>2</sub> | 60    | 75                  |
| 13    | -      | NiBr <sub>2</sub> (DME)             | DMA     | NaI               | K <sub>2</sub> CO <sub>3</sub> | B <sub>2</sub> Pin <sub>2</sub> | 60    | ND                  |
| 14    | L2     | NiCl <sub>2</sub> (DME)             | DMA     | NaI               | K <sub>2</sub> CO <sub>3</sub> | B <sub>2</sub> Pin <sub>2</sub> | 60    | 94                  |
| 15    | L2     | Ni(COD) <sub>2</sub>                | DMA     | NaI               | K <sub>2</sub> CO <sub>3</sub> | B <sub>2</sub> Pin <sub>2</sub> | 60    | 80                  |
| 16    | L2     | Ni(ClO <sub>4</sub> ) <sub>2</sub>  | DMA     | NaI               | K <sub>2</sub> CO <sub>3</sub> | B <sub>2</sub> Pin <sub>2</sub> | 60    | 78                  |
| 17    | L2     | Ni(acac) <sub>2</sub>               | DMA     | NaI               | K <sub>2</sub> CO <sub>3</sub> | B <sub>2</sub> Pin <sub>2</sub> | 60    | Trace               |
| 18    | L2     | Ni(OTf) <sub>2</sub>                | DMA     | NaI               | K <sub>2</sub> CO <sub>3</sub> | B <sub>2</sub> Pin <sub>2</sub> | 60    | 81                  |
| 19    | L2     | NiCl <sub>2</sub> (Py) <sub>4</sub> | DMA     | NaI               | K <sub>2</sub> CO <sub>3</sub> | B <sub>2</sub> Pin <sub>2</sub> | 60    | 86                  |
| 20    | L2     | NiBr <sub>2</sub>                   | DMA     | NaI               | K <sub>2</sub> CO <sub>3</sub> | B <sub>2</sub> Pin <sub>2</sub> | 60    | 90                  |
| 21    | L2     | NiI <sub>2</sub>                    | DMA     | NaI               | K <sub>2</sub> CO <sub>3</sub> | B <sub>2</sub> Pin <sub>2</sub> | 60    | 89                  |
| 22    | -      | NiBr <sub>2</sub> (dtbbpy)          | DMA     | NaI               | K <sub>2</sub> CO <sub>3</sub> | B <sub>2</sub> Pin <sub>2</sub> | 60    | 97(95) <sup>b</sup> |



|    |   |                            |                   |               |                                 |                                           |    |    |
|----|---|----------------------------|-------------------|---------------|---------------------------------|-------------------------------------------|----|----|
| 23 | - | NiBr <sub>2</sub> (dtbbpy) | NMP               | Nal           | K <sub>2</sub> CO <sub>3</sub>  | B <sub>2</sub> Pin <sub>2</sub>           | 60 | 91 |
| 24 | - | NiBr <sub>2</sub> (dtbbpy) | DMF               | Nal           | K <sub>2</sub> CO <sub>3</sub>  | B <sub>2</sub> Pin <sub>2</sub>           | 60 | 88 |
| 25 | - | NiBr <sub>2</sub> (dtbbpy) | Dioxane           | Nal           | K <sub>2</sub> CO <sub>3</sub>  | B <sub>2</sub> Pin <sub>2</sub>           | 60 | 35 |
| 26 | - | NiBr <sub>2</sub> (dtbbpy) | DME               | Nal           | K <sub>2</sub> CO <sub>3</sub>  | B <sub>2</sub> Pin <sub>2</sub>           | 60 | 55 |
| 27 | - | NiBr <sub>2</sub> (dtbbpy) | MeCN              | Nal           | K <sub>2</sub> CO <sub>3</sub>  | B <sub>2</sub> Pin <sub>2</sub>           | 60 | 78 |
| 28 | - | NiBr <sub>2</sub> (dtbbpy) | DMSO              | Nal           | K <sub>2</sub> CO <sub>3</sub>  | B <sub>2</sub> Pin <sub>2</sub>           | 60 | 79 |
| 29 | - | NiBr <sub>2</sub> (dtbbpy) | EtOAc             | Nal           | K <sub>2</sub> CO <sub>3</sub>  | B <sub>2</sub> Pin <sub>2</sub>           | 60 | 26 |
| 30 | - | NiBr <sub>2</sub> (dtbbpy) | PhCF <sub>3</sub> | Nal           | K <sub>2</sub> CO <sub>3</sub>  | B <sub>2</sub> Pin <sub>2</sub>           | 60 | 12 |
| 31 | - | NiBr <sub>2</sub> (dtbbpy) | DMA<br>(1 mL)     | Nal           | K <sub>2</sub> CO <sub>3</sub>  | B <sub>2</sub> Pin <sub>2</sub>           | 60 | 96 |
| 32 | - | NiBr <sub>2</sub> (dtbbpy) | DMA<br>(0.2 mL)   | Nal           | K <sub>2</sub> CO <sub>3</sub>  | B <sub>2</sub> Pin <sub>2</sub>           | 60 | 93 |
| 33 | - | NiBr <sub>2</sub> (dtbbpy) | DMA               | KI            | K <sub>2</sub> CO <sub>3</sub>  | B <sub>2</sub> Pin <sub>2</sub>           | 60 | 95 |
| 34 | - | NiBr <sub>2</sub> (dtbbpy) | DMA               | LiI           | K <sub>2</sub> CO <sub>3</sub>  | B <sub>2</sub> Pin <sub>2</sub>           | 60 | 96 |
| 35 | - | NiBr <sub>2</sub> (dtbbpy) | DMA               | NaBr          | K <sub>2</sub> CO <sub>3</sub>  | B <sub>2</sub> Pin <sub>2</sub>           | 60 | 35 |
| 36 | - | NiBr <sub>2</sub> (dtbbpy) | DMA               | TBAI          | K <sub>2</sub> CO <sub>3</sub>  | B <sub>2</sub> Pin <sub>2</sub>           | 60 | 95 |
| 37 | - | NiBr <sub>2</sub> (dtbbpy) | DMA               | TBAB          | K <sub>2</sub> CO <sub>3</sub>  | B <sub>2</sub> Pin <sub>2</sub>           | 60 | 27 |
| 38 | - | NiBr <sub>2</sub> (dtbbpy) | DMA               | Nal<br>(1 eq) | K <sub>2</sub> CO <sub>3</sub>  | B <sub>2</sub> Pin <sub>2</sub>           | 60 | 97 |
| 39 | - | NiBr <sub>2</sub> (dtbbpy) | DMA               | -             | K <sub>2</sub> CO <sub>3</sub>  | B <sub>2</sub> Pin <sub>2</sub>           | 60 | 82 |
| 40 | - | NiBr <sub>2</sub> (dtbbpy) | DMA               | Nal           | Li <sub>2</sub> CO <sub>3</sub> | B <sub>2</sub> Pin <sub>2</sub>           | 60 | 27 |
| 41 | - | NiBr <sub>2</sub> (dtbbpy) | DMA               | Nal           | K <sub>3</sub> PO <sub>4</sub>  | B <sub>2</sub> Pin <sub>2</sub>           | 60 | 54 |
| 42 | - | NiBr <sub>2</sub> (dtbbpy) | DMA               | Nal           | AcOK                            | B <sub>2</sub> Pin <sub>2</sub>           | 60 | 8  |
| 43 | - | NiBr <sub>2</sub> (dtbbpy) | DMA               | Nal           | LiOMe                           | B <sub>2</sub> Pin <sub>2</sub>           | 60 | 54 |
| 44 | - | NiBr <sub>2</sub> (dtbbpy) | DMA               | Nal           | <i>t</i> BuOK                   | B <sub>2</sub> Pin <sub>2</sub>           | 60 | 32 |
| 45 | - | NiBr <sub>2</sub> (dtbbpy) | DMA               | Nal           | K <sub>2</sub> HPO <sub>4</sub> | B <sub>2</sub> Pin <sub>2</sub>           | 60 | 39 |
| 46 | - | NiBr <sub>2</sub> (dtbbpy) | DMA               | Nal           | DIPEA                           | B <sub>2</sub> Pin <sub>2</sub>           | 60 | 18 |
| 47 | - | NiBr <sub>2</sub> (dtbbpy) | DMA               | Nal           | NaOH                            | B <sub>2</sub> Pin <sub>2</sub>           | 60 | 31 |
| 48 | - | NiBr <sub>2</sub> (dtbbpy) | DMA               | Nal           | -                               | B <sub>2</sub> Pin <sub>2</sub>           | 60 | ND |
| 49 | - | NiBr <sub>2</sub> (dtbbpy) | DMA               | Nal           | K <sub>2</sub> CO <sub>3</sub>  | B2                                        | 60 | 97 |
| 50 | - | NiBr <sub>2</sub> (dtbbpy) | DMA               | Nal           | K <sub>2</sub> CO <sub>3</sub>  | B3                                        | 60 | 69 |
| 51 | - | NiBr <sub>2</sub> (dtbbpy) | DMA               | Nal           | K <sub>2</sub> CO <sub>3</sub>  | B4                                        | 60 | 26 |
| 52 | - | NiBr <sub>2</sub> (dtbbpy) | DMA               | Nal           | K <sub>2</sub> CO <sub>3</sub>  | B5                                        | 60 | 41 |
| 53 | - | NiBr <sub>2</sub> (dtbbpy) | DMA               | Nal           | K <sub>2</sub> CO <sub>3</sub>  | B6                                        | 60 | 34 |
| 54 | - | NiBr <sub>2</sub> (dtbbpy) | DMA               | Nal           | K <sub>2</sub> CO <sub>3</sub>  | B <sub>2</sub> Pin <sub>2</sub><br>(1 eq) | 60 | 86 |
| 55 | - | NiBr <sub>2</sub> (dtbbpy) | DMA               | Nal           | K <sub>2</sub> CO <sub>3</sub>  | B <sub>2</sub> Pin <sub>2</sub><br>(2 eq) | 60 | 96 |
| 56 | - | NiBr <sub>2</sub> (dtbbpy) | DMA               | Nal           | K <sub>2</sub> CO <sub>3</sub>  | -                                         | 60 | ND |
| 57 | - | NiBr <sub>2</sub> (dtbbpy) | DMA               | Nal           | K <sub>2</sub> CO <sub>3</sub>  | B <sub>2</sub> Pin <sub>2</sub>           | 80 | 90 |
| 58 | - | NiBr <sub>2</sub> (dtbbpy) | DMA               | Nal           | K <sub>2</sub> CO <sub>3</sub>  | B <sub>2</sub> Pin <sub>2</sub>           | 40 | 92 |

| 59        | - | NiBr <sub>2</sub> (dtbbpy) | DMA | NaI       | K <sub>2</sub> CO <sub>3</sub> | B <sub>2</sub> Pin <sub>2</sub> | 25 | 85 |
|-----------|---|----------------------------|-----|-----------|--------------------------------|---------------------------------|----|----|
| <b>B1</b> |   | <b>B2</b>                  |     | <b>B3</b> |                                |                                 |    |    |
| <b>B4</b> |   | <b>B5</b>                  |     | <b>B6</b> |                                |                                 |    |    |

<sup>a</sup> NMR yield using 2,5-dimethylfuran as the internal standard. <sup>b</sup> Isolated yield. <sup>c</sup> Not detected.

## 2. Initial trial for the reaction of S1 and S2 using the method developed for alkyl-alkyl coupling:

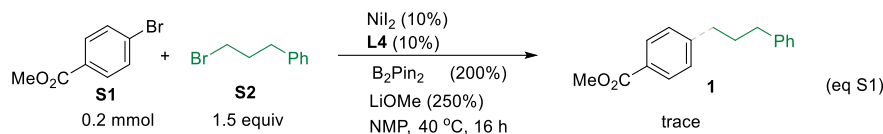

## Part 3. Cross-Coupling Reactions and Product Characterization

**Standard method A** for the coupling of electron deficient aryl bromides with primary alkyl bromides:

To a flame-dried tube with a stir bar was added aryl halide (0.1 mmol, 1.0 equiv), NiBr<sub>2</sub>(dtbbpy) (4 mg, 8 mol %). The tube was transferred into an N<sub>2</sub>-filled glovebox, B<sub>2</sub>pin<sub>2</sub> (38 mg, 0.15 mmol, 1.5 equiv), NaI (7.5 mg, 0.05 mmol, 0.5 equiv) and K<sub>2</sub>CO<sub>3</sub> (25 mg, 0.18 mmol, 1.8 equiv) were added. The tube was sealed, removed from the glovebox and charged with DMA (0.5 mL). The mixture was stirred vigorously, alkyl bromide (0.12 mmol, 1.2 equiv) was added to the tube. The mixture was stirred vigorously at 60 °C for 24 h. After that, the reaction mixture was quenched with water (10 mL), extracted with EtOAc (3 x 15 mL). The combined organic layers were washed with brine (2 x 10 mL), dried with MgSO<sub>4</sub>, filtered, and concentrated under reduced pressure. The residue was purified by chromatography on silica gel, eluting with ethyl acetate/petroleum ether to give the target molecular.

**Note:**

(1) for the coupling of heteroaryl bromides with primary alkyl halides, a similar procedure to the standard method A was used, except that dtbbpy (2.7 mg, 10 mol %) and NiCl<sub>2</sub>(Py)<sub>4</sub> (3.6 mg, 8 mol %) displaced NiBr<sub>2</sub>(dtbbpy), and NaI (30 mg, 2 equiv), TBAI (18 mg, 0.5 equiv) were employed.

(2) for the coupling of electron rich aryl iodides with primary alkyl bromides, a similar procedure to the standard method A was used except that NaI (30 mg, 2 equiv), TBAI (18 mg, 0.5 equiv) and alkyl bromide (1.5 equiv) were employed.

(3) for the coupling of aryl halides with secondary alkyl bromides, a similar procedure to the standard method A was used, except that Ni(OTf)<sub>2</sub> (4 mg, 8 mol %), dtbbpy (2.7 mg, 10 mol %) displaced NiBr<sub>2</sub>(dtbbpy), and NaI (30 mg, 2 equiv), TBAI (18 mg, 0.5 equiv) and alkyl bromide (1.5 equiv) were employed.

(4) for the coupling of alkyl-pyridinium salts, a similar procedure to the standard method A was used, except NaI (18 mg, 1 equiv), and alkyl-pyridinium salt (1.5 equiv) were employed.

**Method C** for the coupling of alcohols with aryl halides: In a N<sub>2</sub> filled glove box, a mixture of a secondary alcohol (0.15 mmol, 150 mol%), 2-chloro-3-ethylbenzoxazolium tetrafluoroborate (CEBO) (40.4 mg, 0.15 mmol, 150 mol%) and Bu<sub>4</sub>NBr (48.4 mg, 0.15 mmol, 150 mol%) in MeCN (0.2 mL) was stirred in a Schlenk tube for 5 minutes (unless otherwise noted) at room temperature. To the reaction mixture, pyridine (12.1 μL, 0.15 mmol, 1.5 equiv), aryl halide (0.1 mmol, 1.0 equiv), NiBr<sub>2</sub>(dtbbpy) (4 mg, 8 mol %), B<sub>2</sub>pin<sub>2</sub> (38 mg, 0.15 mmol, 1.5 equiv), NaI (30 mg, 2mmol, 2 equiv), K<sub>2</sub>CO<sub>3</sub> (25 mg, 0.18 mmol, 1.8 equiv) were added. The tube was sealed, removed from the glovebox and charged with DMA (0.4 mL). The mixture was stirred vigorously at 60 °C for 24 h. After that, the reaction mixture was quenched with water (10 mL), extracted with EtOAc (3 x 15 mL). The combined organic layers were washed with brine (2 x 10 mL), dried with MgSO<sub>4</sub>, filtered, and concentrated under reduced pressure. The residue was purified by chromatography on silica gel, eluting with ethyl acetate/petroleum ether to give the target molecular.

### Methyl 4-(3-phenylpropyl)benzoate (**1a**)<sup>4</sup>

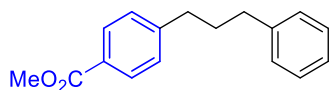

This compound was prepared according to method A using methyl 4-bromobenzoate and (3-bromopropyl)benzene. Purification by flash column chromatograph to afford **1a** as a colorless oil (24.1 mg, 95% yield).

**<sup>1</sup>H NMR (600 MHz, CDCl<sub>3</sub>)** δ 7.95 (d, *J* = 8.0 Hz, 2H), 7.28 (t, *J* = 7.5 Hz, 2H), 7.24 (s, 2H), 7.20 – 7.15 (m, 3H), 3.89 (s, 3H), 2.72 – 2.66 (m, 2H), 2.64 (t, *J* = 7.7 Hz, 2H), 1.96 (tt, *J* = 9.2, 6.7 Hz, 2H).

**Gram-scale synthesis:** To a dry 100 mL flask equipped with a teflon-coated magnetic stir bar was added 4-bromobenzoate (1.08 g, 5.0 mmol, 1.0 equiv), NiBr<sub>2</sub>(dtbbpy) (98 mg, 4 mol %). The flask was transferred into an N<sub>2</sub>-filled glovebox, B<sub>2</sub>pin<sub>2</sub> (1.91 g, 7.5 mmol, 1.5 equiv), NaI (374 mg, 0.5 equiv) and K<sub>2</sub>CO<sub>3</sub> (1.24 g, 1.8 equiv) were added. The flask was sealed, removed from the glovebox and charged with DMA (25 mL). The mixture was stirred vigorously, (3-bromopropyl)benzene (1.19 g, 1.2 equiv) was added to the flask. The mixture was stirred vigorously at 60 °C for 48 h (detected by GCMS). After that, the reaction mixture was quenched with water (100 mL), extracted with EtOAc (3 x 100 mL). The combined organic layers were washed with brine (3 x 50 mL), dried with MgSO<sub>4</sub>, filtered, and concentrated under reduced pressure. The residue was purified by chromatography on silica gel, eluting with ethyl acetate/petroleum ether to give the target molecular **1a** (1.1g, 86%).

### Methyl 4-dodecylbenzoate (**1b**)

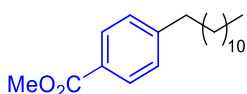

This compound was prepared according to method A using methyl 4-bromobenzoate and 1-bromododecane. Purification by flash column chromatograph to afford **1b** as a colorless oil (26.8 mg, 88% yield).

**Ten Gram-scale synthesis:** To a dry 250 mL flask equipped with a teflon-coated magnetic stir bar was added 4-bromobenzoate (10.75 g, 50.0 mmol, 1.0 equiv), NiBr<sub>2</sub>(dtbbpy) (974 mg, 2.0 mmol, 4 mol %). The flask was transferred into an N<sub>2</sub>-filled glovebox, B<sub>2</sub>pin<sub>2</sub> (14.95 g, 60.0 mmol, 1.2 equiv), NaI (3.75 g, 25.0 mmol, 0.5 equiv) and K<sub>2</sub>CO<sub>3</sub> (10.37 g, 75 mmol, 1.5 equiv) were added. The flask was sealed, removed from the glovebox and charged with DMA (125 mL). The mixture was stirred vigorously, 1-bromododecane (14.95 g,

60.0 mmol, 1.2 equiv) was added to the flask. The mixture was stirred vigorously at 60 °C for 48 h (detected by GCMS). After that, the reaction mixture was quenched with water (700 mL), extracted with EtOAc (4 x 300 mL). The combined organic layers were washed with brine (3 x 300 mL), dried with MgSO<sub>4</sub>, filtered, and concentrated under reduced pressure. The residue was purified by chromatography on silica gel, eluting with ethyl acetate/petroleum ether to give the target molecular **1b** (12.8 g, 84%).

**<sup>1</sup>H NMR (600 MHz, CDCl<sub>3</sub>)** δ 7.94 (d, *J* = 8.0 Hz, 2H), 7.23 (d, *J* = 8.0 Hz, 2H), 3.90 (s, 3H), 2.65 (t, *J* = 7.8 Hz, 2H), 1.62 (t, *J* = 7.5 Hz, 2H), 1.31 – 1.24 (m, 18H), 0.88 (t, *J* = 7.0 Hz, 3H).

**<sup>13</sup>C NMR (151 MHz, CDCl<sub>3</sub>)** δ 167.3, 148.7, 129.8, 128.6, 127.7, 52.1, 36.2, 32.1, 31.3, 29.8, 29.8, 29.7, 29.6, 29.5, 29.4, 22.8, 14.3.

HRMS calcd for C<sub>20</sub>H<sub>33</sub>O<sub>2</sub> [M+H]<sup>+</sup> 305.2475, found 305.2463.

#### Methyl 3-(3-phenylpropyl)benzoate (**2**)<sup>7</sup>

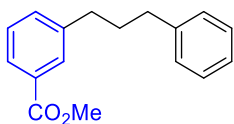

This compound was prepared according to method A using methyl 3-bromobenzoate and (3-bromopropyl)benzene. Purification by flash column chromatograph to afford **2** as a colorless oil (14 mg, 55% yield).

**<sup>1</sup>H NMR (600 MHz, CDCl<sub>3</sub>)** δ 7.91 – 7.83 (m, 2H), 7.40 – 7.33 (m, 2H), 7.31 – 7.26 (m, 2H), 7.19 (dd, *J* = 8.5, 6.9 Hz, 3H), 3.91 (s, 3H), 2.68 (dt, *J* = 26.3, 7.7 Hz, 4H), 1.98 (tt, *J* = 9.3, 6.8 Hz, 2H).

#### 4-(3-phenylpropyl)benzotrile (**3**)<sup>7</sup>

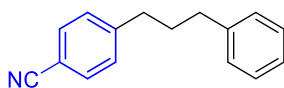

This compound was prepared according to method A using methyl 4-bromobenzotrile and (3-bromopropyl)benzene. Purification by flash column chromatograph to afford **3** as a colorless oil (19.9 mg, 94% yield).

**<sup>1</sup>H NMR (600 MHz, CDCl<sub>3</sub>)** δ 7.58 (d, *J* = 8.0 Hz, 2H), 7.33 – 7.26 (m, 4H), 7.24 – 7.15 (m, 3H), 2.68 (dt, *J* = 28.1, 7.7 Hz, 4H), 1.97 (tt, *J* = 9.4, 6.8 Hz, 2H).

**<sup>13</sup>C NMR (151 MHz, CDCl<sub>3</sub>)** δ 148.1, 141.7, 132.3, 129.3, 128.6, 128.5, 126.1, 119.3, 109.8, 35.6, 35.4, 32.6.

#### 2-(3-Phenylpropyl)benzonitrile (**4**)<sup>8</sup>

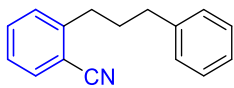

This compound was prepared according to method A using 2-bromobenzonitrile and (3-bromopropyl)benzene. Purification by flash column chromatograph to afford **4** as a colorless oil (17.0 mg, 77% yield).

**<sup>1</sup>H NMR (600 MHz, CDCl<sub>3</sub>)** δ 7.62 (dd, *J* = 7.7, 1.3 Hz, 1H), 7.50 (td, *J* = 7.7, 1.4 Hz, 1H), 7.36 – 7.27 (m, 4H), 7.25 – 7.17 (m, 3H), 2.95 – 2.86 (m, 2H), 2.71 (t, *J* = 7.8 Hz, 2H), 2.06 – 1.95 (m, 2H).

**<sup>13</sup>C NMR (151 MHz, CDCl<sub>3</sub>)** δ 146.4, 141.7, 133.0, 132.9, 129.6, 128.5, 126.6, 126.1, 118.2, 112.5, 35.6, 34.3, 32.6.

#### Diethyl (4-(3-phenylpropyl)phenyl)phosphonate (**5**)

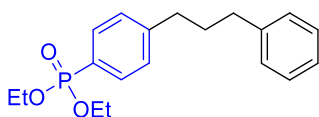

This compound was prepared according to method A using diethyl (4-bromophenyl)phosphonate and (3-bromopropyl)benzene. Purification by flash column chromatograph to afford **5** as a colorless oil (29.9 mg, 90% yield).

**<sup>1</sup>H NMR (600 MHz, CDCl<sub>3</sub>)** δ 7.72 (dd, *J* = 13.1, 7.8 Hz, 2H), 7.33 – 7.25 (m, 5H), 7.21 – 7.15 (m, 3H), 4.18 – 4.03 (m, 4H), 2.67 (dt, *J* = 22.4, 7.7 Hz, 4H), 2.02 – 1.94 (m, 2H), 1.32 (t, *J* = 7.1 Hz, 6H).

**<sup>13</sup>C NMR (151 MHz, CDCl<sub>3</sub>)** δ 147.3, 142.0, 132.1, 132.0, 128.8, 128.7, 128.5, 128.5, 62.1, 35.6, 35.5, 32.7, 16.5.

HRMS calcd for C<sub>19</sub>H<sub>26</sub>O<sub>3</sub>P [M+H]<sup>+</sup> 333.1614, found 333.1616.

#### 4-(3-Phenylpropyl)benzaldehyde (**6**)<sup>4</sup>

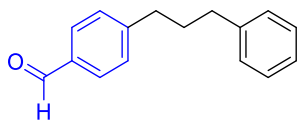

This compound was prepared according to method A using diethyl 4-bromobenzaldehyde and (3-bromopropyl)benzene. Purification by flash column chromatograph to afford **6** as a colorless oil (19.9 mg, 89% yield).

**<sup>1</sup>H NMR (600 MHz, CDCl<sub>3</sub>)** δ 9.97 (s, 1H), 7.80 (d, *J* = 7.9 Hz, 2H), 7.34 (d, *J* = 7.8 Hz, 2H), 7.28 (d, *J* = 7.4 Hz, 2H), 7.21 – 7.16 (m, 3H), 2.75 – 2.70 (m, 2H), 2.66 (t, *J* = 7.7 Hz, 2H), 1.99 (tt, *J* = 9.4, 6.7 Hz, 2H).

#### Isopropyl 2-methyl-2-(4-(4-(3-phenylpropyl)benzoyl)phenoxy)propanoate (**7**)

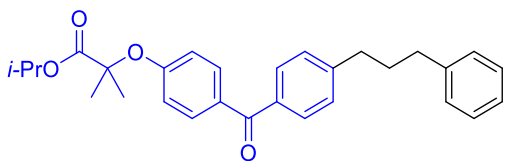

This compound was prepared according to method A using diethyl isopropyl 2-(4-(4-bromobenzoyl)phenoxy)-2-methylpropanoate and (3-bromopropyl)benzene.

Purification by flash column chromatograph to afford **7** as a colorless oil (40.9 mg, 92% yield).

**<sup>1</sup>H NMR (600 MHz, CDCl<sub>3</sub>)** δ 7.78 – 7.73 (m, 2H), 7.71 – 7.66 (m, 2H), 7.32 – 7.25 (m, 4H), 7.22 – 7.17 (m, 3H), 6.88 – 6.83 (m, 2H), 5.09 (hept, *J* = 6.3 Hz, 1H), 2.70 (dt, *J* = 30.0, 7.7 Hz, 4H), 2.10 – 1.93 (m, 2H), 1.66 (s, 6H), 1.20 (d, *J* = 6.3 Hz, 6H).

**<sup>13</sup>C NMR (151 MHz, CDCl<sub>3</sub>)** δ 195.5, 173.3, 159.5, 147.1, 142.1, 135.9, 132.1, 131.0, 130.2, 128.5, 128.5, 128.4, 126.0, 117.3, 79.5, 69.4, 35.5, 35.5, 32.8, 25.5, 21.6.

HRMS calcd for C<sub>29</sub>H<sub>32</sub>NaO<sub>4</sub> [M+Na]<sup>+</sup> 467.2193, found 467.2182.

#### 8-(3-Phenylpropyl)quinoline (**8**)<sup>9</sup>

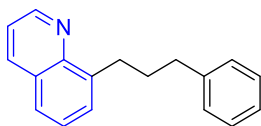

This compound was prepared according to method A (for heteroaryl halides) using 8-bromoquinoline and (3-bromopropyl)benzene. Purification by flash column chromatograph to afford **8** as a pale yellow oil (14.1 mg, 57% yield).

**<sup>1</sup>H NMR (600 MHz, CDCl<sub>3</sub>)** δ 8.95 (dd, *J* = 4.3, 1.7 Hz, 1H), 8.14 (dd, *J* = 8.3, 1.8 Hz, 1H), 7.68 (d, *J* = 8.0 Hz, 1H), 7.56 (d, *J* = 7.0 Hz, 1H), 7.47 (t, *J* = 7.6 Hz, 1H), 7.40 (dd, *J* = 8.2, 4.1 Hz, 1H), 7.28 (t, *J* = 7.5 Hz, 2H), 7.23 (s, 2H), 7.17 (t, *J* = 7.3 Hz, 1H), 3.36 (t, *J* = 7.8 Hz, 2H), 2.81 – 2.74 (m, 2H), 2.15 (tt, *J* = 9.8, 6.7 Hz, 2H).

#### 4-(3-Phenylpropyl)quinoline (**9**)<sup>10</sup>

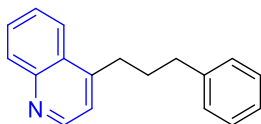

This compound was prepared according to method A (for heteroaryl halides) using 4-bromoquinoline and (3-bromopropyl)benzene. Purification by flash column chromatograph to afford **9** as a pale yellow oil (18.1 mg, 73% yield).

**<sup>1</sup>H NMR (600 MHz, CDCl<sub>3</sub>)** δ 8.80 (d, *J* = 4.4 Hz, 1H), 8.16 – 8.07 (m, 1H), 7.95 (dd, *J* = 8.5, 1.4 Hz, 1H), 7.70 (ddd, *J* = 8.4, 6.8, 1.4 Hz, 1H), 7.54 (ddd, *J* = 8.3, 6.8, 1.3 Hz, 1H), 7.31 (t, *J* = 7.6 Hz, 2H), 7.22 (ddd, *J* = 11.1, 7.1, 3.6 Hz, 4H), 3.17 – 3.05 (m, 2H), 2.77 (t, *J* = 7.6 Hz, 2H), 2.12 (tt, *J* = 9.6, 6.9 Hz, 2H).  
**<sup>13</sup>C NMR (151 MHz, CDCl<sub>3</sub>)** δ 150.3, 148.4, 148.4, 141.7, 130.3, 129.2, 128.6, 127.7, 126.4, 126.2, 123.6, 120.9, 35.8, 31.7, 31.6.

### 3-(3-Phenylpropyl)quinoline (10)<sup>11</sup>

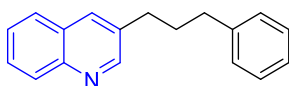

This compound was prepared according to method A (for heteroaryl halides) using 3-bromoquinoline and (3-bromopropyl)benzene. Purification by flash column chromatograph to afford **10** as a pale yellow oil (22.7 mg, 92% yield).

**<sup>1</sup>H NMR (600 MHz, CDCl<sub>3</sub>)** δ 8.79 (d, *J* = 2.2 Hz, 1H), 8.09 (d, *J* = 8.4 Hz, 1H), 7.92 (d, *J* = 2.1 Hz, 1H), 7.77 (dd, *J* = 8.2, 1.4 Hz, 1H), 7.66 (ddd, *J* = 8.4, 6.8, 1.4 Hz, 1H), 7.53 (td, *J* = 7.5, 6.8, 1.3 Hz, 1H), 7.31 (dd, *J* = 8.7, 6.7 Hz, 2H), 7.24 – 7.17 (m, 3H), 2.84 (t, *J* = 7.8 Hz, 2H), 2.72 (t, *J* = 7.7 Hz, 2H), 2.11 – 2.04 (m, 2H).

**<sup>13</sup>C NMR (151 MHz, CDCl<sub>3</sub>)** δ 152.1, 146.9, 141.8, 134.9, 134.4, 129.3, 128.7, 128.6, 128.6, 127.4, 128.3, 126.7, 126.1, 35.4, 32.7, 32.7.

### 2-(3-Phenylpropyl)quinoline (11)<sup>10</sup>

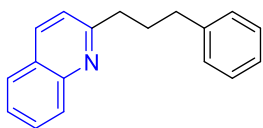

This compound was prepared according to method A (for heteroaryl halides) using 2-bromoquinoline and (3-bromopropyl)benzene. Purification by flash column chromatograph to afford **11** as a pale yellow oil (16.3 mg, 66% yield).

**<sup>1</sup>H NMR (600 MHz, CDCl<sub>3</sub>)** δ <sup>1</sup>H NMR (600 MHz, Chloroform-*d*) δ 8.06 (dd, *J* = 10.9, 8.5 Hz, 2H), 7.78 (d, *J* = 8.1 Hz, 1H), 7.69 (ddd, *J* = 8.4, 6.8, 1.4 Hz, 1H), 7.49 (t, *J* = 7.5 Hz, 1H), 7.28 (dt, *J* = 7.5, 3.4 Hz, 3H), 7.24 – 7.15 (m, 3H), 3.06 – 2.98 (m, 2H), 2.74 (t, *J* = 7.8 Hz, 2H), 2.21 – 2.11 (m, 2H).

### 4-(3-Phenylpropyl)pyridine (12)<sup>11</sup>



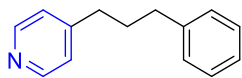

This compound was prepared according to method A (for heteroaryl halides) using 4-bromopyridine and (3-bromopropyl)benzene. Purification by flash column chromatograph to afford **12** as a pale yellow oil (14.8 mg, 75% yield)

**$^1\text{H NMR}$  (600 MHz,  $\text{CDCl}_3$ )**  $\delta$  8.54 – 8.42 (m, 2H), 7.29 (t,  $J = 7.5$  Hz, 2H), 7.23 – 7.14 (m, 3H), 7.14 – 7.06 (m, 2H), 2.65 (dt,  $J = 10.8, 7.7$  Hz, 4H), 1.97 (tt,  $J = 9.3, 6.8$  Hz, 2H).

**$^{13}\text{C NMR}$  (151 MHz,  $\text{CDCl}_3$ )**  $\delta$  151.4, 149.7, 141.7, 128.5, 128.5, 126.1, 124.1, 35.4, 34.7, 31.9.

#### 4-(3-Phenylpropyl)-2-(trifluoromethyl)pyridine (**13**)

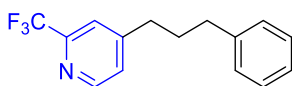

This compound was prepared according to method A (for heteroaryl halides) using 4-bromo-2-(trifluoromethyl)pyridine and (3-bromopropyl)benzene. Purification by flash column chromatograph to afford **13** as a pale yellow oil (13.5 mg, 51% yield).

**$^1\text{H NMR}$  (600 MHz,  $\text{CDCl}_3$ )**  $\delta$  8.61 (d,  $J = 5.0$  Hz, 1H), 7.50 (d,  $J = 1.6$  Hz, 1H), 7.30 (dd,  $J = 8.9, 6.3$  Hz, 3H), 7.24 – 7.20 (m, 1H), 7.19 – 7.15 (m, 2H), 2.71 (dt,  $J = 26.0, 7.7$  Hz, 4H), 2.01 (tt,  $J = 9.4, 6.9$  Hz, 2H).

**$^{13}\text{C NMR}$  (151 MHz,  $\text{CDCl}_3$ )**  $\delta$  153.2, 149.8, 148.2 (q,  $J = 34.2$  Hz), 141.1, 128.5, 128.4, 126.4, 126.1, 121.6 (q,  $J = 274.2$  Hz), 120.5 (q,  $J = 2.6$  Hz), 35.2, 34.6, 31.6.

HRMS calcd for  $\text{C}_{15}\text{H}_{15}\text{F}_3\text{N}$   $[\text{M}+\text{H}]^+$  266.1151, found 266.1148.

#### 3-(3-Phenylpropyl)pyridine (**14**)<sup>11</sup>

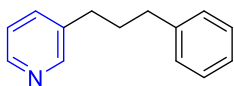

This compound was prepared according to method A (for heteroaryl halides) using 3-bromopyridine and (3-bromopropyl)benzene. Purification by flash column chromatograph to afford **14** as a pale yellow oil (14.0 mg, 71% yield).

**$^1\text{H NMR}$  (600 MHz,  $\text{CDCl}_3$ )**  $\delta$  8.45 (s, 2H), 7.50 (d,  $J = 7.6$  Hz, 1H), 7.29 (t,  $J = 7.5$  Hz, 2H), 7.19 (dd,  $J = 14.1, 7.4$  Hz, 4H), 2.66 (q,  $J = 7.8$  Hz, 4H), 1.97 (p,  $J = 7.7$  Hz, 2H).

**$^{13}\text{C NMR}$  (151 MHz,  $\text{CDCl}_3$ )**  $\delta$  150.0, 147.4, 141.8, 137.5, 135.9, 128.5, 126.0, 123.4, 35.4, 32.7, 32.6.

#### 2-fluoro-5-(3-Phenylpropyl)pyridine (**15**)<sup>12</sup>

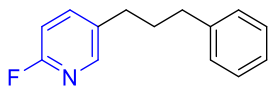

This compound was prepared according to method A (for heteroaryl halides) using 5-bromo-2-fluoropyridine and (3-bromopropyl)benzene. Purification by flash column chromatograph to afford **15** a colorless oil (11.2 mg, 52% yield).

**<sup>1</sup>H NMR (600 MHz, CDCl<sub>3</sub>)** δ 8.05 – 7.97 (m, 1H), 7.59 (td, *J* = 8.1, 2.5 Hz, 1H), 7.30 (t, *J* = 7.5 Hz, 2H), 7.23 – 7.14 (m, 3H), 6.85 (dd, *J* = 8.4, 2.9 Hz, 1H), 2.65 (dt, *J* = 14.8, 7.7 Hz, 4H), 1.95 (tt, *J* = 9.1, 6.9 Hz, 2H).

#### 4-(5-(3-Phenylpropyl)pyridin-2-yl)morpholine (**16**)

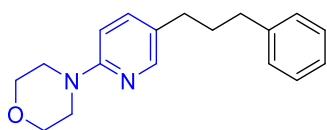

This compound was prepared according to method A (for heteroaryl halides) using 4-(5-bromopyridin-2-yl)morpholine and (3-bromopropyl)benzene. Purification by flash column chromatograph to afford **16** as a pale yellow oil (24.8 mg, 88% yield).

**<sup>1</sup>H NMR (600 MHz, CDCl<sub>3</sub>)** δ 8.05 (d, *J* = 2.3 Hz, 1H), 7.35 (dd, *J* = 8.6, 2.4 Hz, 1H), 7.28 (t, *J* = 7.5 Hz, 2H), 7.22 – 7.12 (m, 3H), 6.60 (d, *J* = 8.6 Hz, 1H), 3.89 – 3.77 (m, 4H), 3.49 – 3.38 (m, 4H), 2.63 (t, *J* = 7.7 Hz, 2H), 2.53 (t, *J* = 7.6 Hz, 2H), 1.90 (tt, *J* = 9.1, 6.8 Hz, 2H).

**<sup>13</sup>C NMR (151 MHz, CDCl<sub>3</sub>)** δ 158.3, 147.4, 142.2, 138.1, 128.5, 128.5, 127.5, 125.9, 107.1, 66.9, 46.2, 35.3, 33.0, 31.6.

HRMS calcd for C<sub>18</sub>H<sub>23</sub>N<sub>2</sub>O [M+H]<sup>+</sup> 283.1805, found 283.1804

#### 2-(3-Phenylpropyl)pyridine (**17**)<sup>11</sup>

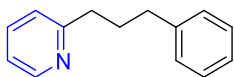

This compound was prepared according to method A (for heteroaryl halides) using 2-bromopyridine and (3-bromopropyl)benzene. Purification by flash column chromatograph to afford **17** as a colorless oil (16.2 mg, 82% yield).

**<sup>1</sup>H NMR (600 MHz, CDCl<sub>3</sub>)** δ 8.53 (dd, *J* = 5.0, 1.7 Hz, 1H), 7.57 (td, *J* = 7.7, 1.8 Hz, 1H), 7.27 (t, *J* = 7.6 Hz, 2H), 7.18 (dd, *J* = 15.6, 7.5 Hz, 3H), 7.13 (d, *J* = 7.8 Hz, 1H), 7.09 (dd, *J* = 7.5, 4.9 Hz, 1H), 2.86 – 2.79 (m, 2H), 2.68 (t, *J* = 7.8 Hz, 2H), 2.07 (tt, *J* = 9.7, 6.7 Hz, 2H).

**<sup>13</sup>C NMR (151 MHz, CDCl<sub>3</sub>)** δ 162.1, 149.3, 142.2, 136.4, 128.6, 128.4, 125.9, 122.9, 121.1, 38.0, 35.7, 31.6.

### 2-Methyl-6-(3-phenylpropyl)pyridine (**18**)<sup>11</sup>

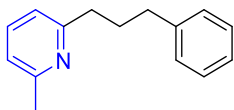

This compound was prepared according to method A (for heteroaryl halides) using 2-bromo-6-methylpyridine and (3-bromopropyl)benzene. Purification by flash column chromatograph to afford **18** as a colorless oil (13.9 mg, 66% yield).

**<sup>1</sup>H NMR (600 MHz, CDCl<sub>3</sub>)** δ 7.47 (t, *J* = 7.6 Hz, 1H), 7.31 – 7.26 (m, 2H), 7.22 – 7.15 (m, 3H), 6.95 (dd, *J* = 13.4, 7.6 Hz, 2H), 2.83 – 2.77 (m, 2H), 2.71 – 2.66 (m, 2H), 2.53 (s, 3H), 2.07 – 2.02 (m, 2H).

**<sup>13</sup>C NMR (151 MHz, CDCl<sub>3</sub>)** δ 161.5, 157.9, 142.4, 136.7, 128.6, 128.4, 125.9, 120.6, 119.7, 38.2, 35.8, 32.0, 24.7.

### 5-Methyl-2-(3-phenylpropyl)pyridine (**19**)

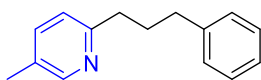

This compound was prepared according to method A (for heteroaryl halides) using 2-bromo-5-methylpyridine and (3-bromopropyl)benzene. Purification by flash column chromatograph to afford **19** as a pale yellow oil (16.5 mg, 78% yield).

**<sup>1</sup>H NMR (600 MHz, CDCl<sub>3</sub>)** δ 8.35 (d, *J* = 2.2 Hz, 1H), 7.39 (dd, *J* = 7.9, 2.3 Hz, 1H), 7.28 (d, *J* = 7.6 Hz, 2H), 7.22 – 7.15 (m, 3H), 7.03 (d, *J* = 7.9 Hz, 1H), 2.83 – 2.76 (m, 2H), 2.71 – 2.64 (m, 2H), 2.29 (s, 3H), 2.08 – 2.01 (m, 2H).

**<sup>13</sup>C NMR (151 MHz, CDCl<sub>3</sub>)** δ 159.0, 149.7, 142.2, 137.1, 130.3, 128.6, 128.4, 125.9, 122.4, 37.5, 35.7, 31.7, 18.2.

HRMS calcd for C<sub>15</sub>H<sub>18</sub>N [M+H]<sup>+</sup> 212.1434, found 212.1430

### 5-Phenyl-2-(3-phenylpropyl)pyridine (**20**)

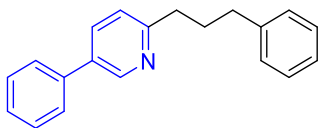

This compound was prepared according to method A (for heteroaryl halides) using 2-bromo-5-phenylpyridine and (3-bromopropyl)benzene. Purification by flash column chromatograph to afford **20** as a pale yellow solid (24.6 mg, 90% yield).

**<sup>1</sup>H NMR (600 MHz, CDCl<sub>3</sub>)** δ 8.77 (d, *J* = 2.3 Hz, 1H), 7.79 (dd, *J* = 8.0, 2.4 Hz, 1H), 7.60 – 7.55 (m, 2H), 7.47 (t, *J* = 7.6 Hz, 2H), 7.39 (t, *J* = 7.4 Hz, 1H), 7.29 (t, *J* = 7.6 Hz, 2H), 7.25 – 7.17 (m, 4H), 2.92 – 2.85 (m, 2H), 2.73 (t, *J* = 7.7 Hz, 2H), 2.12 (tt, *J* = 9.4, 6.9 Hz, 2H).

**<sup>13</sup>C NMR (151 MHz, CDCl<sub>3</sub>)** δ 160.9, 147.8, 142.2, 138.1, 134.9, 134.1, 129.1, 128.6, 128.5, 127.9, 127.1, 125.9, 122.8, 37.6, 35.7, 31.6.

HRMS calcd for C<sub>20</sub>H<sub>20</sub>N [M+H]<sup>+</sup> 274.1588, found 274.1590.

#### 4-Methyl-2-(3-phenylpropyl)pyridine (**21**)<sup>12</sup>

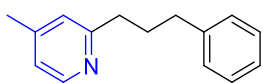

This compound was prepared according to method A (for heteroaryl halides) using 2-bromo-4-methylpyridine and (3-bromopropyl)benzene. Purification by flash column chromatograph to afford **21** as a colorless oil (19.0 mg, 91% yield).

**<sup>1</sup>H NMR (600 MHz, CDCl<sub>3</sub>)** δ 8.38 (d, *J* = 5.0 Hz, 1H), 7.27 (t, *J* = 7.5 Hz, 2H), 7.22 – 7.14 (m, 3H), 6.95 (s, 1H), 6.92 (d, *J* = 5.1 Hz, 1H), 2.82 – 2.74 (m, 2H), 2.68 (t, *J* = 7.8 Hz, 2H), 2.09 – 2.02 (m, 2H).

**<sup>13</sup>C NMR (151 MHz, CDCl<sub>3</sub>)** δ 161.8, 149.1, 147.4, 142.3, 128.6, 128.4, 125.9, 123.8, 122.2, 37.9, 35.7, 31.6, 21.1.

#### 2-(3-Phenylpropyl)-1*H*-indene (**22**)<sup>13</sup>

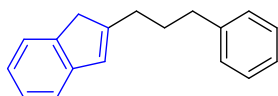

This compound was prepared according to method A (for heteroaryl halides) using 2-bromo-1*H*-indene and (3-bromopropyl)benzene. Purification by flash column chromatograph to afford **22** as a colorless oil (13.1 mg, 56% yield).

**<sup>1</sup>H NMR (600 MHz, CDCl<sub>3</sub>)** δ 7.38 (d, *J* = 7.4 Hz, 1H), 7.31 – 7.26 (m, 3H), 7.21 (t, *J* = 7.0 Hz, 4H), 7.10 (td, *J* = 7.4, 1.2 Hz, 1H), 6.53 (t, *J* = 1.7 Hz, 1H), 3.31 (s, 2H), 2.68 (t, *J* = 7.7 Hz, 2H), 2.52 (t, *J* = 7.6 Hz, 2H), 1.95 (p, *J* = 7.7 Hz, 2H).

#### (*E*)-1,2-Dimethoxy-4-(5-phenylpent-1-en-1-yl)benzene (**23**)

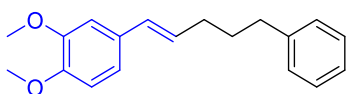

This compound was prepared according to method A (for heteroaryl halides) using (*E*)-4-(2-bromovinyl)-1,2-dimethoxybenzene and (3-phenylpropyl)benzene.

bromopropyl)benzene. Purification by flash column chromatograph to afford **23** as colorless oil (15.5 mg, 55% yield).

**<sup>1</sup>H NMR (600 MHz, CDCl<sub>3</sub>)** δ 7.32 – 7.27 (m, 2H), 7.23 – 7.17 (m, 3H), 6.91 (d, *J* = 2.0 Hz, 1H), 6.88 (dd, *J* = 8.2, 2.0 Hz, 1H), 6.81 (d, *J* = 8.2 Hz, 1H), 6.34 (dt, *J* = 15.8, 1.5 Hz, 1H), 6.11 (dt, *J* = 15.7, 6.9 Hz, 1H), 3.90 (s, 3H), 3.88 (s, 3H), 2.72 – 2.64 (m, 2H), 2.29 – 2.21 (m, 2H), 1.85 – 1.77 (m, 2H).

**<sup>13</sup>C NMR (151 MHz, CDCl<sub>3</sub>)** δ 149.1, 148.4, 142.5, 131.1, 129.9, 128.8, 128.6, 128.4, 125.8, 118.9, 111.3, 108.6, 56.1, 55.9, 35.6, 32.6, 31.3.

HRMS calcd for C<sub>19</sub>H<sub>23</sub>O<sub>2</sub> [M+H]<sup>+</sup> 283.1693, found 283.1700.

#### 1-Methoxy-4-(3-phenylpropyl)benzene (**24**)<sup>4</sup>

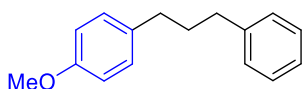

This compound was prepared according to method A (for electron-rich aryl iodides) using 1-iodo-4-methoxybenzene and (3-bromopropyl)benzene.

Purification by flash column chromatograph to afford **24** as a colorless oil (17.7 mg, 78% yield).

**<sup>1</sup>H NMR (600 MHz, CDCl<sub>3</sub>)** δ 7.29 (t, *J* = 7.5 Hz, 2H), 7.22 – 7.16 (m, 3H), 7.14 – 7.08 (m, 2H), 6.91 – 6.78 (m, 2H), 3.80 (s, 3H), 2.63 (dt, *J* = 25.5, 7.7 Hz, 4H), 1.98 – 1.89 (m, 2H).

#### Methyl(4-(3-phenylpropyl)phenyl)sulfane (**25**)

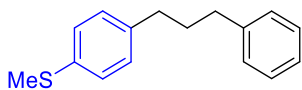

This compound was prepared according to method A (for electron-rich aryl iodides) using (4-iodophenyl)(methyl)sulfane and (3-bromopropyl)benzene.

Purification by flash column chromatograph to afford **25** as a colorless oil (11.4 mg, 80% yield).

**<sup>1</sup>H NMR (600 MHz, CDCl<sub>3</sub>)** δ 7.32 – 7.27 (m, 2H), 7.23 – 7.16 (m, 5H), 7.12 (d, *J* = 8.2 Hz, 2H), 2.64 (dt, *J* = 17.4, 7.7 Hz, 4H), 2.48 (s, 3H), 1.99 – 1.90 (m, 2H).

**<sup>13</sup>C NMR (151 MHz, CDCl<sub>3</sub>)** δ 142.3, 139.6, 135.3, 129.1, 128.6, 128.4, 127.3, 125.9, 35.5, 35.0, 33.0, 16.5.

HRMS calcd for C<sub>16</sub> H<sub>19</sub> S [M+H]<sup>+</sup> 243.1202, found 243.1188.

#### 1-(4-(3-Phenylpropyl)phenyl)piperidin-2-one (**26**)

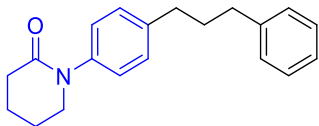

This compound was prepared according to method A (for electron-rich aryl iodides) using 1-(4-iodophenyl)piperidin-2-one and (3-bromopropyl)benzene. Purification by flash column chromatograph to afford **26** as a colorless oil (15.0 mg, 51% yield).

**<sup>1</sup>H NMR (600 MHz, CDCl<sub>3</sub>)** δ 7.28 (dd, *J* = 8.3, 6.9 Hz, 2H), 7.23 – 7.17 (m, 5H), 7.17 – 7.13 (m, 2H), 3.62 (td, *J* = 5.7, 5.1, 2.5 Hz, 2H), 2.71 – 2.61 (m, 4H), 2.60 – 2.52 (m, 2H), 1.99 – 1.90 (m, 6H).

**<sup>13</sup>C NMR (151 MHz, CDCl<sub>3</sub>)** δ 170.2, 142.3, 141.2, 141.0, 129.3, 128.6, 128.4, 126.2, 125.9, 51.9, 35.6, 35.1, 33.0, 32.9, 23.7, 21.6.

HRMS calcd for C<sub>20</sub>H<sub>24</sub>NO [M+H]<sup>+</sup> 294.1852, found 294.1851.

#### 1-Chloro-4-(3-phenylpropyl)benzene (**27**)<sup>4</sup>

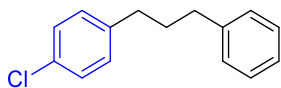

This compound was prepared according to method A (for electron-rich aryl iodides) using 1-chloro-4-iodobenzene and (3-bromopropyl)benzene. Purification by flash column chromatograph to afford **27** as a colorless oil (18.9 mg, 82% yield).

**<sup>1</sup>H NMR (600 MHz, CDCl<sub>3</sub>)** δ 7.29 (t, *J* = 7.5 Hz, 2H), 7.26 – 7.23 (m, 2H), 7.21 – 7.16 (m, 3H), 7.11 (d, *J* = 8.2 Hz, 2H), 2.63 (dt, *J* = 12.5, 7.7 Hz, 4H), 1.97 – 1.91 (m, 2H).

**<sup>13</sup>C NMR (151 MHz, CDCl<sub>3</sub>)** δ 142.2, 140.8, 131.6, 129.9, 128.6, 128.5, 128.5, 126.0, 35.4, 34.9, 33.0.

#### 4,4,5,5-Tetramethyl-2-(4-(3-phenylpropyl)phenyl)-1,3,2-dioxaborolane (**28**)<sup>7</sup>

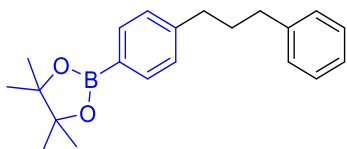

This compound was prepared according to method A (for electron-rich aryl iodides) using 2-(4-iodophenyl)-4,4,5,5-tetramethyl-1,3,2-dioxaborolane and (3-bromopropyl)benzene. Purification by flash column chromatograph to afford **28** as a colorless oil (27.7 mg, 86% yield).

**<sup>1</sup>H NMR (600 MHz, CDCl<sub>3</sub>)** δ 7.78 – 7.68 (m, 2H), 7.28 (dd, *J* = 8.6, 6.8 Hz, 2H), 7.22 – 7.15 (m, 5H), 2.65 (dt, *J* = 15.1, 7.7 Hz, 4H), 2.00 – 1.91 (m, 2H), 1.34 (s, 12H).

**<sup>13</sup>C NMR (151 MHz, CDCl<sub>3</sub>)** δ 145.9, 142.4, 135.0, 128.6, 128.4, 128.1, 125.9, 83.8, 35.8, 35.5, 32.9, 25.0.

### 1-Methoxy-2-(3-phenylpropyl)benzene (**29**)<sup>4</sup>

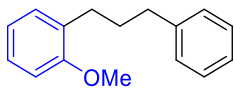

This compound was prepared according to method A (for electron-rich aryl iodides) using 1-iodo-2-methoxybenzene and (3-bromopropyl)benzene. Purification by flash column chromatograph to afford **29** a colorless oil (19.0 mg, 84% yield).

**<sup>1</sup>H NMR (600 MHz, CDCl<sub>3</sub>)**  $\delta$  7.29 (t,  $J = 7.6$  Hz, 2H), 7.25 – 7.16 (m, 4H), 7.14 (dd,  $J = 7.4, 1.7$  Hz, 1H), 6.89 (td,  $J = 7.4, 1.1$  Hz, 1H), 6.85 (dd,  $J = 8.2, 1.1$  Hz, 1H), 3.82 (s, 3H), 2.72 – 2.62 (m, 4H), 1.99 – 1.88 (m, 2H).

**<sup>13</sup>C NMR (151 MHz, CDCl<sub>3</sub>)**  $\delta$  157.6, 142.8, 130.8, 129.9, 128.6, 128.4, 127.1, 125.7, 120.4, 110.4, 55.4, 35.9, 31.5, 30.1.

### 2-Methoxy-6-(3-phenylpropyl)naphthalene (**30**)

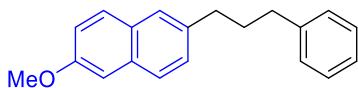

This compound was prepared according to method A (for electron-rich aryl iodides) using 2-iodo-6-methoxynaphthalene and (3-bromopropyl)benzene. Purification by flash column chromatograph to afford **30** a colorless oil (15.5 mg, 56% yield).

**<sup>1</sup>H NMR (600 MHz, CDCl<sub>3</sub>)**  $\delta$  7.68 (d,  $J = 8.1$  Hz, 2H), 7.56 (d,  $J = 1.3$  Hz, 1H), 7.35 – 7.27 (m, 3H), 7.23 – 7.18 (m, 3H), 7.13 (d,  $J = 8.5$  Hz, 2H), 3.92 (s, 3H), 2.79 (t,  $J = 7.7$  Hz, 2H), 2.72 – 2.66 (m, 2H), 2.05 (tt,  $J = 9.2, 6.9$  Hz, 2H).

**<sup>13</sup>C NMR (151 MHz, CDCl<sub>3</sub>)**  $\delta$  157.3, 142.5, 137.6, 133.1, 129.2, 129.0, 128.6, 128.4, 128.0, 126.8, 126.4, 125.9, 118.8, 105.8, 55.4, 35.6, 35.5, 33.1.

HRMS calcd for C<sub>20</sub>H<sub>21</sub>O [M+H]<sup>+</sup> 277.1587, found 277.1572.

### 2-Methoxy-6-(3-phenylpropyl)quinoline (**31**)

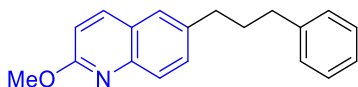

This compound was prepared according to method A (for electron-rich aryl iodides) using 6-iodo-2-methoxyquinoline and (3-bromopropyl)benzene. Purification by flash column chromatograph to afford **31** as a pale yellow oil (21.6 mg, 78% yield).

**<sup>1</sup>H NMR (600 MHz, CDCl<sub>3</sub>)** δ 7.91 (d, *J* = 8.8 Hz, 1H), 7.79 (d, *J* = 8.4 Hz, 1H), 7.51 – 7.46 (m, 2H), 7.30 (d, *J* = 15.2 Hz, 2H), 7.23 – 7.17 (m, 3H), 6.88 (d, *J* = 8.8 Hz, 1H), 4.07 (s, 3H), 2.80 (t, *J* = 7.7 Hz, 2H), 2.72 – 2.65 (m, 2H), 2.09 – 2.00 (m, 2H).

**<sup>13</sup>C NMR (151 MHz, CDCl<sub>3</sub>)** δ 162.2, 145.3, 142.3, 138.4, 138.1, 130.9, 128.6, 128.5, 127.2, 126.3, 125.9, 125.2, 113.1, 53.5, 35.6, 35.3, 33.1.

HRMS calcd for C<sub>19</sub>H<sub>20</sub>NO [M+H]<sup>+</sup> 278.1539, found 278.1542.

***tert*-Butyl 6-(3-phenylpropyl)-1*H*-indole-1-carboxylate (**32**)**

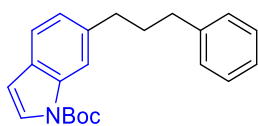

This compound was prepared according to method A (for electron-rich aryl iodides) using *tert*-butyl 6-iodo-1*H*-indole-1-carboxylate and (3-bromopropyl)benzene.

Purification by flash column chromatograph to afford **32** as a pale yellow oil (22.8 mg, 68% yield).

**<sup>1</sup>H NMR (600 MHz, CDCl<sub>3</sub>)** δ 8.03 (s, 1H), 7.52 (d, *J* = 3.6 Hz, 1H), 7.46 (d, *J* = 7.9 Hz, 1H), 7.31 – 7.25 (m, 2H), 7.22 – 7.15 (m, 3H), 7.07 (dd, *J* = 8.0, 1.5 Hz, 1H), 6.58 – 6.44 (m, 1H), 2.86 – 2.74 (m, 2H), 2.70 – 2.64 (m, 2H), 2.08 – 1.98 (m, 2H), 1.67 (s, 9H).

**<sup>13</sup>C NMR (151 MHz, CDCl<sub>3</sub>)** δ 167.9, 150.0, 142.5, 138.9, 132.1, 128.6, 128.4, 125.8, 125.5, 123.7, 120.7, 115.0, 107.3, 83.6, 36.2, 35.7, 33.7, 28.4.

HRMS calcd for C<sub>22</sub>H<sub>26</sub>NO<sub>2</sub> [M+H]<sup>+</sup> 336.1958, found 336.1955.

***tert*-Butyl 3-(3-phenylpropyl)-9*H*-carbazole-9-carboxylate (**33**)**

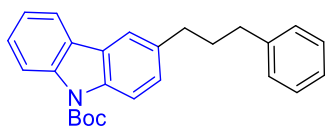

This compound was prepared according to method A (for electron-rich aryl iodides) using *tert*-butyl 3-iodo-9*H*-carbazole-9-carboxylate and (3-bromopropyl)benzene. Purification by flash column chromatograph to afford **33** as an off-white solid (35.5 mg, 92% yield).

**<sup>1</sup>H NMR (600 MHz, CDCl<sub>3</sub>)** δ <sup>1</sup>H NMR (600 MHz, Chloroform-*d*) δ 8.31 (d, *J* = 8.4 Hz, 1H), 8.21 (d, *J* = 8.5 Hz, 1H), 7.97 (dt, *J* = 7.6, 0.9 Hz, 1H), 7.79 (d, *J* = 1.7 Hz, 1H), 7.46 (ddd, *J* = 8.5, 7.2, 1.3 Hz, 1H),



7.35 (td,  $J = 7.5, 1.0$  Hz, 1H), 7.31 (ddd,  $J = 8.1, 4.3, 2.3$  Hz, 3H), 7.24 – 7.19 (m, 3H), 2.83 (t,  $J = 7.7$  Hz, 2H), 2.76 – 2.67 (m, 2H), 2.11 – 2.02 (m, 2H), 1.77 (s, 9H).

**$^{13}\text{C}$  NMR (151 MHz,  $\text{CDCl}_3$ )**  $\delta$  151.3, 142.4, 138.9, 137.2, 137.0, 128.6, 128.5, 127.8, 127.0, 126.0, 125.9, 125.9, 123.0, 119.6, 119.2, 116.4, 116.2, 83.9, 35.6, 35.4, 33.6, 28.5.

HRMS calcd for  $\text{C}_{26}\text{H}_{27}\text{NNaO}_2$   $[\text{M}+\text{Na}]^+$  408.1934, found 408.1941.

#### 5-(3-Phenylpropyl)-2-(trifluoromethyl)pyridine (**34**)<sup>11</sup>

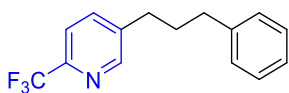

This compound was prepared according to method A (for electron-rich aryl iodides) using 5-iodo-2-(trifluoromethyl)pyridine and (3-bromopropyl)benzene. Purification by flash column chromatograph to afford **34** as a colorless oil (18.6 mg, 70% yield).

**$^1\text{H}$  NMR (600 MHz,  $\text{CDCl}_3$ )**  $\delta$  8.56 (d,  $J = 2.0$  Hz, 1H), 7.66 (dd,  $J = 8.1, 2.0$  Hz, 1H), 7.60 (d,  $J = 8.0$  Hz, 1H), 7.30 (d,  $J = 7.5$  Hz, 2H), 7.20 (dd,  $J = 22.6, 7.4$  Hz, 3H), 2.71 (dt,  $J = 25.8, 7.7$  Hz, 4H), 2.00 (p,  $J = 7.7$  Hz, 2H).

#### 1-(3-Phenylpropyl)-4-(trifluoromethyl)benzene (**35**)<sup>4</sup>

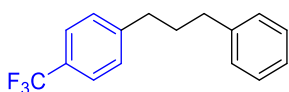

This compound was prepared according to method A (for electron-rich aryl iodides) using 1-iodo-4-(trifluoromethyl)benzene and (3-bromopropyl)benzene. Purification by flash column chromatograph to afford **35** as a colorless oil (24.0 mg, 91% yield).

**$^1\text{H}$  NMR (600 MHz,  $\text{CDCl}_3$ )**  $\delta$  7.54 (d,  $J = 7.9$  Hz, 2H), 7.30 (t,  $J = 7.7$  Hz, 4H), 7.23 – 7.17 (m, 3H), 2.71 (t,  $J = 7.8$  Hz, 2H), 2.66 (t,  $J = 7.7$  Hz, 2H), 1.98 (tt,  $J = 9.3, 6.9$  Hz, 2H).

#### Ethyl 2-methyl-2-(4-(3-phenylpropyl)phenoxy)propanoate (**36**)

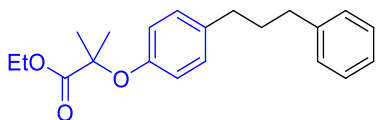

This compound was prepared according to method A (for electron-rich aryl iodides) using ethyl 2-(4-iodophenoxy)-2-methylpropanoate and (3-bromopropyl)benzene. Purification by flash column chromatograph to afford **36** as a colorless oil (22.7 mg, 85% yield).

**<sup>1</sup>H NMR (600 MHz, CDCl<sub>3</sub>)** δ 7.27 (dd, *J* = 8.6, 6.6 Hz, 2H), 7.17 (t, *J* = 7.2 Hz, 3H), 7.04 (d, *J* = 8.4 Hz, 2H), 6.81 – 6.71 (m, 2H), 4.23 (q, *J* = 7.1 Hz, 2H), 2.60 (dt, *J* = 27.1, 7.7 Hz, 4H), 1.91 (tt, *J* = 9.4, 6.7 Hz, 2H), 1.57 (s, 6H), 1.25 (t, *J* = 7.1 Hz, 3H).

**<sup>13</sup>C NMR (151 MHz, CDCl<sub>3</sub>)** δ 174.6, 153.5, 142.5, 136.2, 129.1, 128.6, 128.4, 125.8, 119.4, 61.5, 35.5, 34.7, 33.2, 25.5, 14.2.

HRMS calcd for C<sub>21</sub>H<sub>26</sub>NaO<sub>3</sub> [M+Na]<sup>+</sup> 349.1774, found 349.1774.

### 2-(4-Fluorophenyl)-5-(2-methyl-5-(3-phenylpropyl)benzyl)thiophene (37)

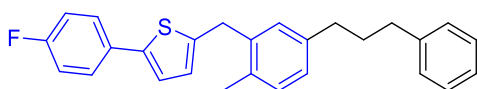

This compound was prepared according to method A (for electron-rich aryl iodides) using 2-(4-fluorophenyl)-5-(5-iodo-2-methylbenzyl)thiophene and (3-bromopropyl)benzene. Purification by flash column chromatograph to afford **37** as a yellow solid (22.4mg, 56% yield).

**<sup>1</sup>H NMR (600 MHz, CDCl<sub>3</sub>)** δ 7.51 – 7.42 (m, 2H), 7.26 (t, *J* = 7.5 Hz, 2H), 7.20 – 7.14 (m, 3H), 7.09 (d, *J* = 7.7 Hz, 1H), 7.06 – 6.94 (m, 5H), 6.66 (d, *J* = 3.6 Hz, 1H), 4.09 (s, 2H), 2.63 (dt, *J* = 13.1, 7.7 Hz, 4H), 2.29 (s, 3H), 1.94 (tt, *J* = 9.2, 6.8 Hz, 2H).

**<sup>13</sup>C NMR (151 MHz, CDCl<sub>3</sub>)** δ 163.0, 161.4, 143.9, 142.5, 140.3, 138.1, 133.7, 130.6, 129.8, 128.6, 128.4, 127.2, 127.2, 127.1, 126.0, 125.8, 122.8, 115.9, 115.7, 35.5, 35.1, 34.3, 33.2, 19.2.

HRMS calcd for C<sub>27</sub>H<sub>26</sub>FS [M+H]<sup>+</sup> 401.1734, found 401.1738.

### Methyl 4-phenethylbenzoate (38)<sup>14</sup>

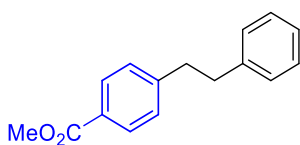

This compound was prepared according to the method A using methyl 4-bromobenzoate and (2-bromoethyl)benzene. Purification by flash column chromatograph to afford **38** as a pale yellow solid (22.3 mg, 93% yield).

**<sup>1</sup>H NMR (600 MHz, CDCl<sub>3</sub>)** δ 7.91 – 7.83 (m, 2H), 7.20 (t, *J* = 7.5 Hz, 2H), 7.16 – 7.10 (m, 3H), 7.09 – 7.05 (m, 2H), 3.82 (s, 3H), 2.94 – 2.82 (m, 4H).

**<sup>13</sup>C NMR (151 MHz, CDCl<sub>3</sub>)** δ 167.3, 147.3, 141.3, 129.8, 128.7, 128.6, 128.5, 128.1, 126.2, 52.1, 38.0, 37.6.

### Methyl 4-(3-phenoxypropyl)benzoate (**39**)

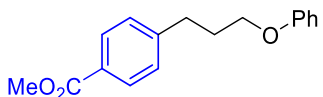

This compound was prepared according to method A using methyl 4-bromobenzoate and (3-bromopropoxy)benzene. Purification by flash column chromatograph to afford **39** as an off-white solid (22.8 mg, 88% yield).

**<sup>1</sup>H NMR (600 MHz, CDCl<sub>3</sub>)**  $\delta$  7.97 (d,  $J$  = 7.9 Hz, 2H), 7.29 (dt,  $J$  = 7.8, 3.8 Hz, 4H), 6.98 – 6.93 (m, 1H), 6.90 (d,  $J$  = 8.1 Hz, 2H), 3.96 (t,  $J$  = 6.2 Hz, 2H), 3.91 (s, 3H), 2.88 (t,  $J$  = 7.7 Hz, 2H), 2.19 – 2.07 (m, 2H).

**<sup>13</sup>C NMR (151 MHz, CDCl<sub>3</sub>)**  $\delta$  167.3, 159.0, 147.2, 129.9, 129.6, 128.7, 128.1, 120.8, 114.6, 66.6, 52.1, 32.4, 30.7.

HRMS calcd for C<sub>17</sub>H<sub>19</sub>O<sub>3</sub> [M+H]<sup>+</sup> 271.1329, found 271.1323.

### Methyl 4-(4-methoxy-4-oxobutyl)benzoate (**40**)<sup>15</sup>

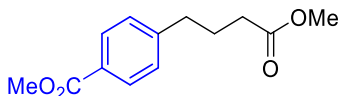

This compound was prepared according to method A using methyl 4-bromobenzoate and methyl 4-bromobutanoate. Purification by flash column chromatograph to afford **40** as a colorless oil (18.7 mg, 79% yield).

**<sup>1</sup>H NMR (600 MHz, CDCl<sub>3</sub>)**  $\delta$  7.95 (d,  $J$  = 8.1 Hz, 2H), 7.24 (d,  $J$  = 8.0 Hz, 2H), 3.90 (s, 3H), 3.66 (s, 3H), 2.70 (t,  $J$  = 7.7 Hz, 2H), 2.33 (t,  $J$  = 7.4 Hz, 2H), 1.97 (p,  $J$  = 7.5 Hz, 2H).

**<sup>13</sup>C NMR (151 MHz, CDCl<sub>3</sub>)**  $\delta$  173.8, 167.2, 147.0, 129.9, 128.6, 128.2, 52.1, 51.7, 35.2, 33.4, 26.2.

### Methyl 4-(3-((4-methoxyphenyl)thio)propyl)benzoate (**41**)

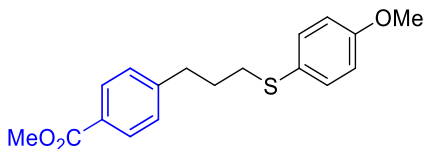

This compound was prepared according to method A using methyl 4-bromobenzoate and (3-bromopropyl)(4-methoxyphenyl)sulfane. Purification by flash column chromatograph to afford **41** as an off-white solid (25.9 mg, 82% yield).

**<sup>1</sup>H NMR (600 MHz, CDCl<sub>3</sub>)**  $\delta$  7.97 – 7.92 (m, 2H), 7.36 – 7.30 (m, 2H), 7.24 – 7.20 (m, 2H), 6.86 – 6.81 (m, 2H), 3.90 (s, 3H), 3.80 (s, 3H), 2.84 – 2.75 (m, 4H), 1.90 (dq,  $J$  = 8.8, 6.8 Hz, 2H).

**<sup>13</sup>C NMR (151 MHz, CDCl<sub>3</sub>)** δ 167.2, 159.1, 147.1, 133.5, 129.9, 128.7, 128.1, 126.3, 114.7, 55.5, 52.1, 35.3, 34.7, 30.5.

HRMS calcd for C<sub>18</sub>H<sub>20</sub>NaO<sub>3</sub>S [M+Na]<sup>+</sup> 339.1025, found 339.1024.

**Methyl 4-(3-(((8*R*,9*S*,13*S*,14*S*)-13-methyl-17-oxo-7,8,9,11,12,13,14,15,16,17-decahydro-6*H*-cyclopenta[*a*]-phenanthren-3-yl)oxy)propyl)benzoate (42)**

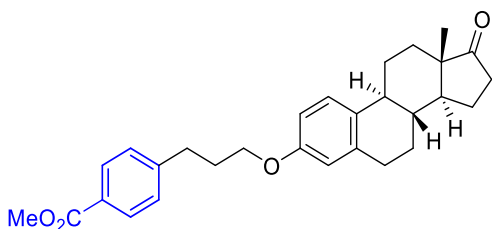

This compound was prepared according to method A using methyl 4-bromobenzoate and (8*R*,9*S*,13*S*,14*S*)-3-(3-bromopropoxy)-13-methyl-6,7,8,9,11,12,13,14,15,16-decahydro-17*H*-cyclopenta[*a*]phenanthren-17-one.

Purification by flash column chromatograph to afford **42** as an off-white solid (34.8 mg, 78% yield).

**<sup>1</sup>H NMR (600 MHz, CDCl<sub>3</sub>)** δ 7.96 (d, *J* = 8.2 Hz, 2H), 7.28 (d, *J* = 8.2 Hz, 2H), 7.19 (d, *J* = 8.5 Hz, 1H), 6.70 (dd, *J* = 8.6, 2.8 Hz, 1H), 6.63 (d, *J* = 2.7 Hz, 1H), 3.93 (t, *J* = 6.2 Hz, 2H), 3.90 (s, 3H), 2.92 – 2.81 (m, 4H), 2.55 – 2.46 (m, 1H), 2.43 – 2.36 (m, 1H), 2.25 (td, *J* = 10.9, 4.4 Hz, 1H), 2.18 – 1.94 (m, 6H), 1.65 – 1.58 (m, 2H), 1.54 – 1.41 (m, 4H), 0.91 (s, 3H).

**<sup>13</sup>C NMR (151 MHz, CDCl<sub>3</sub>)** δ 221.1, 167.3, 157.1, 147.3, 137.9, 132.2, 129.9, 128.7, 128.1, 126.5, 114.7, 112.3, 66.6, 52.1, 50.6, 48.2, 44.1, 38.5, 36.0, 32.4, 31.7, 30.7, 29.8, 26.7, 26.1, 21.7, 14.0.

HRMS calcd for C<sub>29</sub>H<sub>35</sub>O<sub>4</sub> [M+H]<sup>+</sup> 447.2530, found 447.2532.

**Methyl 4-((1,3-dioxolan-2-yl)methyl)benzoate (43)<sup>16</sup>**

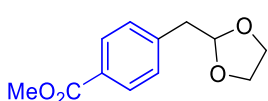

This compound was prepared according to method A using methyl 4-bromobenzoate and 2-(bromomethyl)-1,3-dioxolane. Purification by flash column chromatograph to afford **43** as a colorless oil (18.7 mg, 84% yield).

**<sup>1</sup>H NMR (600 MHz, CDCl<sub>3</sub>)** δ 7.97 (d, *J* = 8.1 Hz, 2H), 7.34 (d, *J* = 8.0 Hz, 2H), 5.09 (t, *J* = 4.6 Hz, 1H), 3.91 (d, *J* = 9.6 Hz, 5H), 3.87 – 3.82 (m, 2H), 3.02 (d, *J* = 4.6 Hz, 2H).

**<sup>13</sup>C NMR (151 MHz, CDCl<sub>3</sub>)** δ 167.2, 141.6, 130.0, 129.7, 128.7, 104.2, 65.2, 52.2, 40.9.

#### Methyl 4-(3-(4-bromophenyl)propyl)benzoate (**44**)

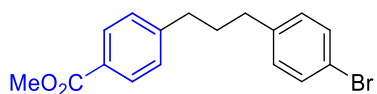

This compound was prepared according to method A using methyl 4-bromobenzoate and 1-bromo-4-(3-iodopropyl)benzene. Purification by flash column chromatograph to afford **44** as a colorless oil (29.5 mg, 89% yield).

**<sup>1</sup>H NMR (600 MHz, CDCl<sub>3</sub>)**  $\delta$  7.97 – 7.93 (m, 2H), 7.45 – 7.37 (m, 2H), 7.25 – 7.20 (m, 2H), 7.08 – 7.01 (m, 2H), 3.90 (s, 3H), 2.71 – 2.66 (m, 2H), 2.61 – 2.56 (m, 2H), 1.97 – 1.91 (m, 2H).

**<sup>13</sup>C NMR (151 MHz, CDCl<sub>3</sub>)**  $\delta$  167.3, 147.6, 141.0, 131.5, 130.3, 129.9, 128.6, 128.0, 119.7, 52.1, 35.4, 34.8, 32.5.

HRMS calcd for C<sub>17</sub>H<sub>18</sub>BrO<sub>2</sub> [M+H]<sup>+</sup> 333.0485, found 333.0477.

#### Methyl 4-(4-phenylbutan-2-yl)benzoate (**45**)<sup>4</sup>

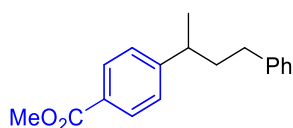

This compound was prepared according to method A (for secondary alkyl bromides) using methyl 4-bromobenzoate and (3-bromobutyl)benzene. Purification by flash column chromatograph to afford **45** as a colorless oil (23.1 mg, 86% yield).

**<sup>1</sup>H NMR (600 MHz, CDCl<sub>3</sub>)**  $\delta$  8.02 – 7.96 (m, 2H), 7.30 – 7.22 (m, 5H), 7.19 – 7.15 (m, 1H), 7.13 – 7.08 (m, 2H), 3.91 (s, 3H), 2.78 (h,  $J = 7.0$  Hz, 1H), 2.55 – 2.43 (m, 2H), 1.99 – 1.88 (m, 2H), 1.28 (d,  $J = 6.9$  Hz, 3H).

**<sup>13</sup>C NMR (151 MHz, CDCl<sub>3</sub>)**  $\delta$  167.3, 152.9, 142.3, 130.0, 128.5, 128.1, 127.3, 125.9, 52.1, 39.8, 39.7, 33.9, 22.4.

#### Methyl 4-cyclohexylbenzoate (**46**)<sup>17</sup>

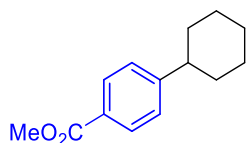

This compound was prepared according to method A (for secondary alkyl bromides) using methyl 4-bromobenzoate and bromocyclohexane. Purification by flash column chromatograph to afford **46** as a colorless oil (12.2 mg, 56% yield).

**<sup>1</sup>H NMR (600 MHz, CDCl<sub>3</sub>)** δ 8.04 – 7.87 (m, 2H), 7.27 (s, 2H), 3.89 (s, 3H), 2.56 (tt, *J* = 11.7, 3.4 Hz, 1H), 1.86 (ddt, *J* = 12.3, 6.4, 2.4 Hz, 4H), 1.76 (dt, *J* = 12.9, 3.1, 1.5 Hz, 1H), 1.48 – 1.35 (m, 4H), 1.30 – 1.22 (m, 1H).

**<sup>13</sup>C NMR (151 MHz, CDCl<sub>3</sub>)** δ 166.6, 152.8, 129.0, 127.1, 126.2, 51.3, 44.0, 33.5, 26.1, 25.4.

**Methyl 4-(tetrahydro-2H-pyran-4-yl)benzoate (47)**<sup>17</sup>

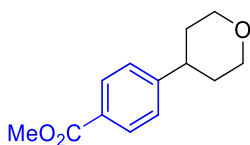

This compound was prepared according to method A (for secondary alkyl bromides) using methyl 4-bromobenzoate and 4-bromotetrahydro-2H-pyran.

Purification by flash column chromatography to afford **47** as an off-white solid (16.7 mg, 76% yield).

**<sup>1</sup>H NMR (600 MHz, CDCl<sub>3</sub>)** δ 8.02 – 7.95 (m, 2H), 7.32 – 7.27 (m, 2H), 4.09 (ddt, *J* = 11.6, 4.4, 1.0 Hz, 2H), 3.90 (s, 3H), 3.53 (td, *J* = 11.7, 2.3 Hz, 2H), 2.82 (tt, *J* = 11.9, 4.1 Hz, 1H).

**<sup>13</sup>C NMR (151 MHz, CDCl<sub>3</sub>)** δ 167.2, 151.2, 130.0, 128.4, 126.9, 68.3, 52.2, 41.8, 33.7.

**Methyl 4-(1-tosylpiperidin-4-yl)benzoate (48)**<sup>4</sup>

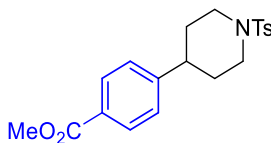

This compound was prepared according to method A (for secondary alkyl bromides) using methyl 4-bromobenzoate and 4-bromo-1-tosylpiperidine.

Purification by flash column chromatography to afford **48** as an off-white solid (18.7 mg, 50% yield).

**<sup>1</sup>H NMR (600 MHz, CDCl<sub>3</sub>)** δ 7.96 (d, *J* = 8.0 Hz, 2H), 7.68 (d, *J* = 8.0 Hz, 2H), 7.35 (d, *J* = 7.9 Hz, 2H), 7.21 (d, *J* = 8.0 Hz, 2H), 3.98 – 3.92 (m, 2H), 3.90 (s, 3H), 2.46 (s, 4H), 2.35 (td, *J* = 11.7, 3.3 Hz, 2H), 1.87 (qd, *J* = 12.3, 10.8, 4.9 Hz, 4H).

**<sup>13</sup>C NMR (151 MHz, CDCl<sub>3</sub>)** δ 167.04, 150.3, 143.72, 133.2, 130.09, 129.80, 128.7, 127.90, 126.89, 52.21, 46.82, 42.05, 32.40, 21.69.

**Methyl 4-(oxetan-3-yl)benzoate (49)**<sup>17</sup>

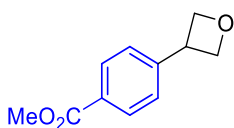

This compound was prepared according to method A (for secondary alkyl bromides) using methyl 4-bromobenzoate and 3-bromooxetane. Purification by flash column chromatograph to afford **49** as an off-white solid (12.5 mg, 65% yield).

**<sup>1</sup>H NMR (600 MHz, CDCl<sub>3</sub>)** δ 8.04 (d, *J* = 8.0 Hz, 2H), 7.47 (d, *J* = 8.0 Hz, 2H), 5.10 (dd, *J* = 8.3, 6.1 Hz, 2H), 4.77 (t, *J* = 6.3 Hz, 2H), 4.34 – 4.22 (m, 1H), 3.92 (s, 3H).

**<sup>13</sup>C NMR (151 MHz, CDCl<sub>3</sub>)** δ 167.0, 146.9, 130.3, 129.1, 127.0, 78.56, 52.3, 40.4.

#### Methyl 4-(2-(cyclohex-1-en-1-yl)ethyl)benzoate (**50**)

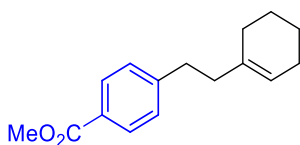

This compound was prepared according to method A (for pyridinium salts) using methyl 4-bromobenzoate and 1-(2-(cyclohex-1-en-1-yl)ethyl)-2,4,6-triphenylpyridin-1-ium tetrafluoroborate. Purification by flash column

chromatograph to afford **50** as a colorless oil (12.7 mg, 52% yield).

**<sup>1</sup>H NMR (600 MHz, CDCl<sub>3</sub>)** δ 8.01 – 7.88 (m, 2H), 7.33 – 7.19 (m, 3H), 5.39 (tt, *J* = 3.7, 1.5 Hz, 1H), 3.90 (s, 3H), 2.82 – 2.71 (m, 2H), 2.23 (t, *J* = 8.1 Hz, 2H), 1.96 (dq, *J* = 6.5, 4.0, 3.0 Hz, 4H), 1.66 – 1.60 (m, 2H), 1.56 – 1.51 (m, 2H).

**<sup>13</sup>C NMR (151 MHz, CDCl<sub>3</sub>)** δ 167.4, 148.3, 136.8, 129.7, 128.6, 127.8, 121.9, 52.1, 39.7, 34.6, 28.6, 25.4, 23.1, 22.6.

HRMS calcd for C<sub>16</sub>H<sub>20</sub>NaO<sub>2</sub> [M+Na]<sup>+</sup> 267.135, found 267.1331.

#### Methyl 4-(2-(6-(2-(tert-butoxy)-2-oxoethyl)-2,2-dimethyl-1,3-dioxan-4-yl)ethyl)benzoate (**51**)

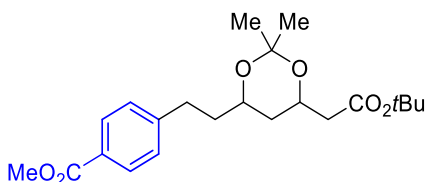

This compound was prepared according to method A (for pyridinium salts) using methyl 4-bromobenzoate and 1-(2-(6-(2-(tert-butoxy)-2-oxoethyl)-2,2-dimethyl-1,3-dioxan-4-yl)ethyl)-2,4,6-triphenylpyridin-1-ium tetrafluoroborate. Purification by

flash column chromatograph to afford **51** as an off-white solid (33.7 mg, 86% yield).

**<sup>1</sup>H NMR (600 MHz, CDCl<sub>3</sub>)** δ 7.99 – 7.92 (m, 2H), 7.26 – 7.22 (m, 2H), 4.20 (dtd, *J* = 11.5, 6.6, 2.4 Hz, 1H), 3.90 (s, 3H), 3.78 (dddd, *J* = 11.0, 8.1, 4.3, 2.5 Hz, 1H), 2.79 (ddd, *J* = 14.2, 9.1, 5.2 Hz, 1H), 2.71 (dt, *J* = 13.9, 8.2 Hz, 1H), 2.42 (dd, *J* = 15.1, 7.0 Hz, 1H), 2.28 (dd, *J* = 15.1, 6.2 Hz, 1H), 1.83 (dtd, *J* = 13.8,

8.6, 5.3 Hz, 1H), 1.70 (dddd,  $J = 13.5, 9.1, 7.5, 4.2$  Hz, 1H), 1.53 (dt,  $J = 12.7, 2.5$  Hz, 1H), 1.43 (s, 9H), 1.41 (s, 3H), 1.39 (s, 3H), 1.21 (dt,  $J = 12.7, 11.5$  Hz, 1H).

**$^{13}\text{C}$  NMR (151 MHz,  $\text{CDCl}_3$ )**  $\delta$  170.4, 167.3, 147.7, 129.8, 128.7, 128.0, 98.9, 80.76, 67.7, 66.3, 52.1, 42.8, 37.6, 36.7, 31.3, 30.3, 28.2, 19.9.

HRMS calcd for  $\text{C}_{22}\text{H}_{32}\text{NaO}_6$   $[\text{M}+\text{Na}]^+$  415.2091, found 415.2091.

#### Methyl 4-((2,2-dimethyl-1,3-dioxolan-4-yl)methyl)benzoate (**52**)

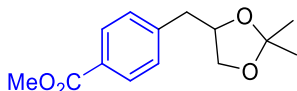

This compound was prepared according to method C using (2,2-dimethyl-1,3-dioxolan-4-yl)methanol (1.5 equiv), CEBO, TBAB (1.5 equiv) in  $\text{CH}_3\text{CN}$  (0.2 mL). After 5 min, to the crude mixture of alkyl bromide was added methyl 4-bromobenzoate. Purification by flash column chromatograph to afford **52** as a colorless oil (12.8 mg, 51% yield).

**$^1\text{H}$  NMR (600 MHz,  $\text{CDCl}_3$ )**  $\delta$  8.07 – 7.91 (m, 2H), 7.29 (d,  $J = 8.0$  Hz, 2H), 4.33 (p,  $J = 6.5$  Hz, 1H), 3.98 (ddd,  $J = 8.2, 5.9, 0.8$  Hz, 1H), 3.90 (d,  $J = 0.8$  Hz, 3H), 3.63 (ddd,  $J = 7.8, 6.8, 0.8$  Hz, 1H), 3.02 (dd,  $J = 13.8, 6.6$  Hz, 1H), 2.85 (dd,  $J = 13.8, 6.4$  Hz, 1H), 1.42 (s, 3H), 1.35 (d,  $J = 0.9$  Hz, 3H).

**$^{13}\text{C}$  NMR (151 MHz,  $\text{CDCl}_3$ )**  $\delta$  167.2, 143.2, 129.9, 129.4, 128.7, 109.5, 69.0, 52.2, 40.2, 27.1, 25.8.

HRMS calcd for  $\text{C}_{14}\text{H}_{19}\text{O}_4$   $[\text{M}+\text{H}]^+$  251.1278, found 251.1281.

#### Sec-butyl 2-(4-(methoxycarbonyl)phenethyl)piperidine-1-carboxylate (**53**)<sup>4</sup>

This compound was prepared according to method C using methyl 4-bromobenzoate and sec-butyl 2-(2-hydroxyethyl)piperidine-1-carboxylate. Purification by flash column chromatograph to afford **53** as a colorless oil (16.3 mg, 47% yield).

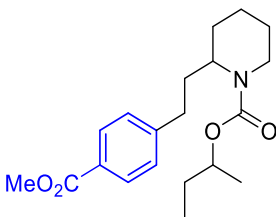

**$^1\text{H}$  NMR (600 MHz,  $\text{CDCl}_3$ )**  $\delta$  7.95 (d,  $J = 8.1$  Hz, 2H), 7.25 (d,  $J = 8.1$  Hz, 2H), 4.76 (dtt,  $J = 12.5, 6.2, 3.2$  Hz, 1H), 4.35 (s, 1H), 4.04 (d,  $J = 20.8$  Hz, 1H), 3.90 (s, 3H), 2.82 (t,  $J = 13.3$  Hz, 1H), 2.72 – 2.54 (m, 2H), 2.05 (tq,  $J = 15.1, 5.8$  Hz, 1H), 1.81 – 1.68 (m, 1H), 1.62 – 1.48 (m, 7H), 1.41 (d,  $J = 12.0$  Hz, 1H), 1.20 (d,  $J = 6.3$  Hz, 3H), 0.90 (q,  $J = 7.4$  Hz, 3H).



**$^{13}\text{C}$  NMR (151 MHz,  $\text{CDCl}_3$ )**  $\delta$  167.3, 155.9, 129.9, 128.5, 128.5, 128.0, 73.0, 52.1, 50.5, 39.0, 33.0, 31.6, 29.3, 28.6, 25.7, 20.0, 19.2, 9.8.

**Methyl 4-(cyclopentylmethyl)benzoate (54)**<sup>17</sup>

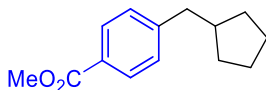

This compound was prepared according to method C using methyl 4-bromobenzoate and cyclopentylmethanol.

Purification by flash column chromatograph to afford **54** as a colorless oil (15.1 mg, 69% yield).

**$^1\text{H}$  NMR (600 MHz,  $\text{CDCl}_3$ )**  $\delta$  7.94 (d,  $J$  = 8.3 Hz, 2H), 7.23 (d,  $J$  = 8.2 Hz, 2H), 3.90 (s, 3H), 2.66 (d,  $J$  = 7.5 Hz, 2H), 2.14 – 2.05 (m, 1H), 1.75 – 1.61 (m, 4H), 1.56 – 1.47 (m, 2H), 1.23 – 1.13 (m, 2H).

**$^{13}\text{C}$  NMR (151 MHz,  $\text{CDCl}_3$ )**  $\delta$  167.4, 148.1, 129.7, 128.9, 127.7, 52.1, 42.3, 41.9, 32.6, 25.0.

**Methyl 4-(2-((4-methylphenyl)sulfonamido)ethyl)benzoate (55)**<sup>18</sup>

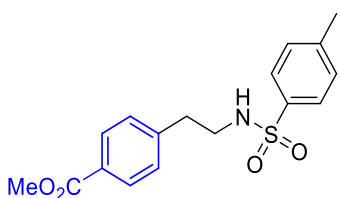

This compound was prepared according to method C using methyl 4-bromobenzoate and *N*-(2-hydroxyethyl)-4-methylbenzenesulfonamide. Purification by flash column chromatograph to afford **55** as an off-white solid (20.7 mg, 62% yield).

**$^1\text{H}$  NMR (600 MHz,  $\text{CDCl}_3$ )**  $\delta$  8.00 – 7.89 (m, 2H), 7.76 – 7.63 (m, 2H), 7.31 – 7.27 (m, 2H), 7.18 – 7.10 (m, 2H), 4.42 (t,  $J$  = 6.3 Hz, 1H), 3.91 (s, 3H), 3.24 (q,  $J$  = 6.8 Hz, 2H), 2.83 (t,  $J$  = 6.9 Hz, 2H), 2.43 (s, 3H).

**Methyl 4-(heptan-4-yl)benzoate (56)**<sup>4</sup>

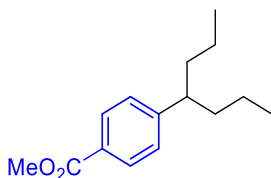

This compound was prepared according to method C using methyl 4-bromobenzoate and heptan-4-ol. Purification by flash column chromatograph to afford **56** as a colorless oil (10.8 mg, 46% yield).

**<sup>1</sup>H NMR (600 MHz, CDCl<sub>3</sub>)** δ 7.98 – 7.92 (m, 2H), 7.21 (d, *J* = 8.2 Hz, 2H), 3.90 (s, 3H), 2.59 (tt, *J* = 9.7, 5.3 Hz, 1H), 1.61 (dddd, *J* = 13.5, 10.0, 6.3, 5.3 Hz, 3H), 1.53 (dtd, *J* = 13.5, 9.5, 5.3 Hz, 2H), 1.21 – 1.05 (m, 3H), 0.83 (t, *J* = 7.3 Hz, 6H).

**<sup>13</sup>C NMR (151 MHz, CDCl<sub>3</sub>)** δ 167.4, 152.2, 129.7, 127.9, 127.9, 52.1, 45.8, 39.1, 20.8, 14.2.

#### Methyl 4-(3-hydroxypropyl)benzoate (**57**)<sup>4</sup>

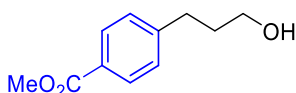

This compound was prepared according to method C using methyl 4-bromobenzoate and propane-1,3-diol. Purification by flash column chromatograph to afford **57** as a colorless oil (7.8 mg, 40% yield).

**<sup>1</sup>H NMR (600 MHz, CDCl<sub>3</sub>)** δ 8.02 – 7.88 (m, 2H), 7.34 – 7.17 (m, 2H), 3.90 (s, 3H), 3.67 (t, *J* = 6.4 Hz, 2H), 2.76 (dd, *J* = 8.7, 6.8 Hz, 2H), 1.98 – 1.85 (m, 2H), 1.72 (s, 1H).

**<sup>13</sup>C NMR (151 MHz, CDCl<sub>3</sub>)** δ 167.3, 147.6, 129.9, 128.6, 128.0, 62.1, 52.1, 33.9, 32.2.

#### Methyl 4-(3-hydroxy-3-methylbutyl)benzoate (**58**)<sup>4</sup>

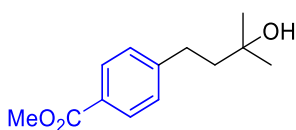

This compound was prepared according to method C using methyl 4-bromobenzoate and 3-methylbutane-1,3-diol. Purification by flash column chromatograph to afford **58** as an off-white solid (13.3 mg, 60% yield).

**<sup>1</sup>H NMR (600 MHz, CDCl<sub>3</sub>)** δ 7.95 (d, *J* = 8.3 Hz, 2H), 7.27 (d, *J* = 8.5 Hz, 2H), 3.90 (s, 3H), 2.86 – 2.68 (m, 2H), 1.89 – 1.74 (m, 2H), 1.30 (s, 6H).

**<sup>13</sup>C NMR (151 MHz, CDCl<sub>3</sub>)** δ 167.3, 148.3, 129.9, 128.5, 127.9, 71.0, 52.1, 45.4, 31.0, 29.5.

#### Methyl 4-(((3*aR*,4*R*,5*R*,6*aS*)-5-hydroxy-2-oxohexahydro-2*H*-cyclopenta[*b*]furan-4-yl)methyl)benzoate (**59**)

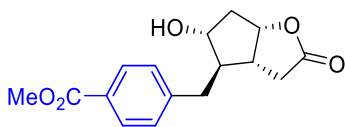

This compound was prepared according to method C using methyl 4-bromobenzoate and (3*aR*,4*S*,5*R*,6*aS*)-5-hydroxy-4-(hydroxymethyl)hexahydro-2*H*-cyclopenta[*b*]furan-2-one. Purification by flash column chromatograph to afford **59** as an off-white solid (16.5 mg, 57% yield).

**<sup>1</sup>H NMR (600 MHz, CDCl<sub>3</sub>)** δ 8.02 – 7.93 (m, 2H), 7.25 – 7.21 (m, 2H), 4.94 (td, *J* = 7.0, 2.5 Hz, 1H), 4.01 (q, *J* = 5.5 Hz, 1H), 3.91 (s, 3H), 2.85 (dd, *J* = 13.8, 6.5 Hz, 1H), 2.65 – 2.50 (m, 3H), 2.37 (ddd, *J* = 15.0, 6.8, 5.8 Hz, 1H), 2.22 – 2.14 (m, 2H), 2.03 (ddd, *J* = 15.0, 5.5, 2.7 Hz, 2H).

**<sup>13</sup>C NMR (151 MHz, CDCl<sub>3</sub>)** δ 177.2, 170.0, 144.6, 130.2, 129.1, 128.8, 83.4, 55.1, 52.3, 42.4, 40.5, 38.8, 35.6.

**Methyl 4-(((3*aR*,4*R*,6*R*,6*aR*)-6-(2,4-dioxo-3,4-dihydropyrimidin-1(2*H*)-yl)-2,2-dimethyltetrahydrofuro[3,4-*d*][1,3]dioxol-4-yl)methyl)benzoate (60)<sup>4</sup>**

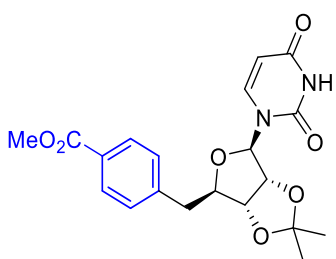

This compound was prepared according to method C using methyl 4-bromobenzoate and 1-((3*aR*,4*R*,6*R*,6*aR*)-6-(hydroxymethyl)-2,2-dimethyltetrahydrofuro[3,4-*d*][1,3]dioxol-4-yl)pyrimidine-2,4(1*H*,3*H*)-dione. Purification by flash column chromatograph to afford **60** as a colorless oil (14.5 mg, 36% yield).

**<sup>1</sup>H NMR (600 MHz, CDCl<sub>3</sub>)** δ 8.10 – 8.03 (m, 2H), 7.75 (s, 1H), 7.23 (d, *J* = 8.2 Hz, 2H), 6.11 (s, 1H), 4.63 (d, *J* = 5.5 Hz, 1H), 4.49 (d, *J* = 5.6 Hz, 1H), 4.41 (dd, *J* = 4.3, 1.8 Hz, 1H), 3.93 (s, 3H), 3.63 (d, *J* = 11.8 Hz, 1H), 3.57 (td, *J* = 11.4, 4.7 Hz, 1H), 1.77 (ddd, *J* = 13.7, 11.0, 4.2 Hz, 1H).

**<sup>13</sup>C NMR (151 MHz, CDCl<sub>3</sub>)** δ 168.5, 166.5, 150.6, 137.5, 130.7, 130.6, 129.7, 113.3, 86.1, 83.6, 81.2, 80.0, 54.8, 52.5, 51.0, 31.8, 26.0, 24.9.

**Methyl 4-((3*aR*,5*S*,6*S*,6*aR*)-5-((*R*)-2,2-dimethyl-1,3-dioxolan-4-yl)-2,2-dimethyltetrahydrofuro[2,3-*d*][1,3]dioxol-6-yl)benzoate (61)<sup>4</sup>**

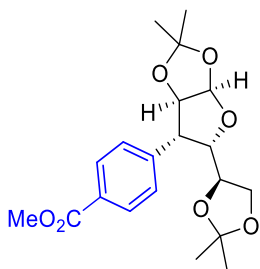

This compound was prepared according to method C using methyl 4-bromobenzoate and (3*aR*,5*S*,6*S*,6*aR*)-5-((*R*)-2,2-dimethyl-1,3-dioxolan-4-yl)-2,2-dimethyltetrahydrofuro[2,3-*d*][1,3]dioxol-6-ol. Purification by flash column chromatograph to afford **61** as an off-white solid (22.3 mg, 59% yield).

**<sup>1</sup>H NMR (600 MHz, CDCl<sub>3</sub>)** δ 7.99 – 7.90 (m, 2H), 7.36 – 7.29 (m, 2H), 6.00 (d, *J* = 3.7 Hz, 1H), 4.58 (d, *J* = 3.7 Hz, 1H), 4.30 (dd, *J* = 7.2, 3.9 Hz, 1H), 4.22 (d, *J* = 3.9 Hz, 1H), 3.90

(s, 3H), 3.71 (ddd,  $J = 10.0, 7.2, 2.9$  Hz, 1H), 3.09 (dd,  $J = 14.4, 2.9$  Hz, 1H), 2.86 (dd,  $J = 14.4, 9.8$  Hz, 1H), 1.60 (s, 2H), 1.50 (s, 3H), 1.33 (d,  $J = 7.9$  Hz, 6H), 1.13 (s, 3H).

**$^{13}\text{C}$  NMR (151 MHz,  $\text{CDCl}_3$ )**  $\delta$  167.3, 144.0, 129.6, 129.4, 128.4, 112.4, 106.5, 101.1, 84.2, 83.2, 75.1, 72.5, 52.1, 39.8, 27.4, 26.7, 24.1, 23.8.

### 1-Dodecyl-2-methylbenzene (**64**)<sup>20</sup>

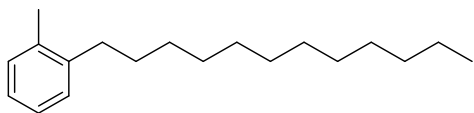

This compound was prepared according to method A (for electron-rich aryl iodides) using 1-iodo-2-methylbenzene and 1-bromododecane. Purification by flash column

chromatograph to afford **64** a colorless oil (22.5 mg, 86% yield)

**$^1\text{H}$ -NMR (600 MHz,  $\text{CDCl}_3$ )**  $\delta$  7.19 – 7.05 (m, 4H), 2.62 – 2.55 (m, 2H), 2.31 (s, 3H), 1.62 – 1.51 (m, 2H), 1.41 – 1.21 (m, 19H), 0.89 (t,  $J = 7.0$  Hz, 3H).

**$^{13}\text{C}$  NMR (151 MHz,  $\text{CDCl}_3$ )**  $\delta$  141.1, 135.9, 130.0, 128.7, 125.8, 125.7, 33.3, 31.9, 30.3, 29.7, 29.7, 29.7, 29.6, 29.6, 29.6, 29.4, 22.7, 19.3, 14.1.

### Unsuccessful Examples:

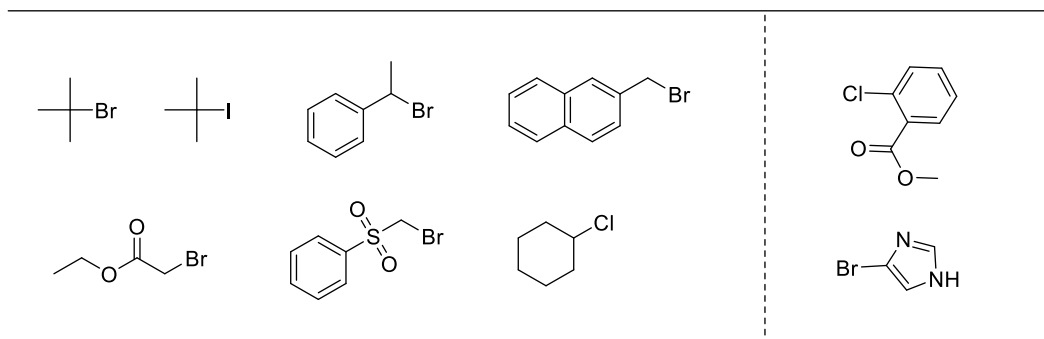

#### Part 4. Homogeneous Reaction conditions

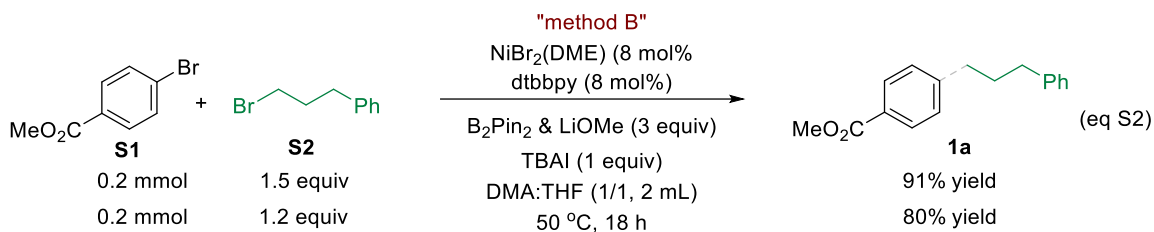

Method B for homogeneous reaction of S1 and S2: To a flame-dried tube charged with a stir bar was added 4-bromobenzoate (43 mg, 0.2 mmol, 1.0 equiv), NiBr<sub>2</sub>(DME) (5.0 mg, 8 mol %) and dtbbpy (4.3 mg, 8 mol %). The flask was transferred into an N<sub>2</sub>-filled glovebox, B<sub>2</sub>pin<sub>2</sub> (152.4 mg, 0.6 mmol, 3 equiv), TBAI (74 mg, 0.2 mmol, 1 equiv) and LiOMe (22.8 mg, 0.6 mmol, 3 equiv) were added. The flask was sealed, removed from the glovebox and charged with DMA/THF (v/v=1:1, 2 mL). The mixture was stirred vigorously, alkyl bromide (59.7 mg, 0.6 mmol, 1.5 equiv) was added to the flask. The mixture was stirred vigorously at 50 °C for 24 h (detected by GCMS). After that, the mixture was quenched with water (10 mL) and extracted with EtOAc (3 x 10 mL) and the combined organic layers were concentrated under reduced pressure. The residue was purified by column chromatography on silica gel (eluted with 0-3% EtOAc/Petroleum ether) to give product **1a** (46 mg, 91%).

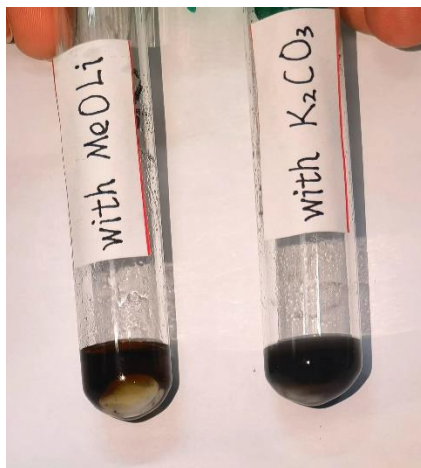

## Part 5. Initial Test of a Three-Component Reaction of Alkyl Halide/Alkene/Aryl Halides

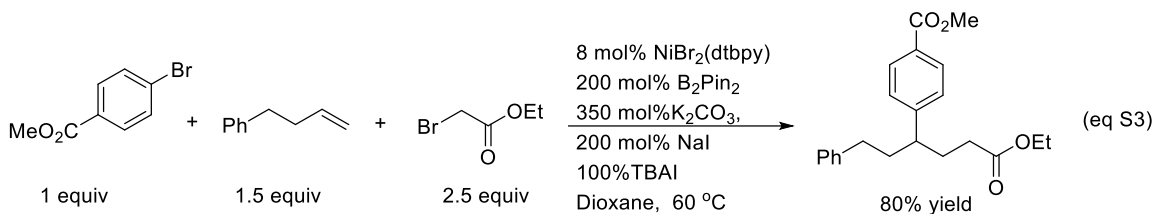

To a flame-dried tube charged with a stir bar was added 4-bromobenzoate (22 mg, 0.1 mmol, 1.0 equiv) and NiBr<sub>2</sub>(dtbbpy) (4.0 mg, 8 mol %). The flask was transferred into an N<sub>2</sub>-filled glovebox, B<sub>2</sub>pin<sub>2</sub> (50.8 mg, 0.2 mmol, 2 equiv), TBAI (37 mg, 0.1 mmol, 1 equiv), NaI (30 mg, 0.2 mmol, 2.0 equiv) and K<sub>2</sub>CO<sub>3</sub> (49.5 mg, 0.35 mmol, 3.5 equiv) were added. The tube was sealed, removed from the glovebox and charged with dioxane (1.0 mL). The mixture was stirred vigorously, but-3-en-1-ylbenzene (19.9 mg, 0.15 mmol, 1.5 equiv) and alkyl bromide (41.8 mg, 0.25 mmol, 2.5 equiv) were added to the tube. The mixture was stirred vigorously at 60 °C for 48 h. After that, the reaction mixture was quenched with water (10 mL), extracted with EtOAc (3 x 15 mL). The combined organic layers were washed with brine (2 x 10 mL), dried with MgSO<sub>4</sub>, filtered, and concentrated under reduced pressure. The residue was purified by chromatography on silica gel, eluting with ethyl acetate/petroleum ether to give **1c** (28.4 mg, 80% yield).

### Methyl 4-(6-ethoxy-6-oxo-1-phenylhexan-3-yl)benzoate (**1c**)

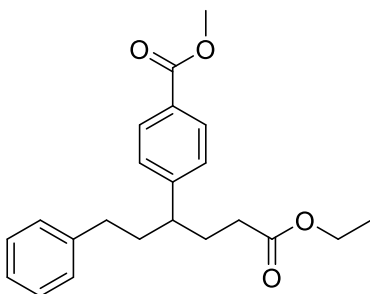

**<sup>1</sup>H-NMR (600 MHz, CDCl<sub>3</sub>)** δ 8.00 (d, *J* = 8.3 Hz, 2H), 7.28 – 7.23 (m, 4H), 7.19 – 7.14 (m, 1H), 7.10 – 7.05 (m, 2H), 4.05 (qd, *J* = 7.2, 3.0 Hz, 2H), 3.92 (s, 3H), 2.64 (tt, *J* = 9.5, 4.6 Hz, 1H), 2.44 (t, *J* = 7.9 Hz, 2H), 2.14 – 1.83 (m, 6H), 1.20 (t, *J* = 7.1 Hz, 3H).

**<sup>13</sup>C-NMR (151 MHz, CDCl<sub>3</sub>)** δ 173.3, 167.0, 149.8, 141.8, 129.9, 128.5, 128.3, 128.3, 127.8, 125.8, 60.3, 52.0, 44.9, 38.1, 33.5, 32.2, 31.6, 14.1.

## Part 6. Mechanistic consideration

### 1. Suzuki coupling with method A

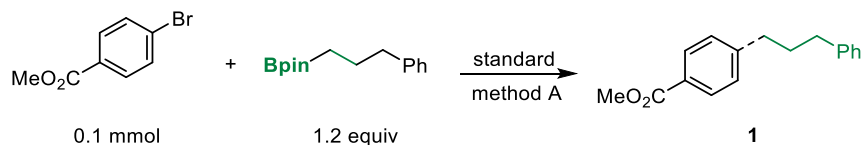

To a flame-dried tube charged with a stir bar was added methyl 4-bromobenzoate (0.1 mmol, 1.0 equiv), NiBr<sub>2</sub>(dtbbpy) (4 mg, 8 mol %). The tube was transferred into an N<sub>2</sub>-filled glovebox, B<sub>2</sub>pin<sub>2</sub> (38 mg, 0.15 mmol, 1.5 equiv), NaI (7.5 mg, 0.05 mmol, 0.5 equiv) and K<sub>2</sub>CO<sub>3</sub> (25 mg, 0.18 mmol, 1.8 equiv) were added. The tube was sealed, removed from the glovebox and charged with DMA (0.5 mL). The mixture was stirred vigorously, 4,4,5,5-tetramethyl-2-(3-phenylpropyl)-1,3,2-dioxaborolane (0.12 mmol, 1.2 equiv) was added to the tube. The mixture was stirred vigorously at 60 °C for 24 h. After that, the reaction mixture was quenched with water (2 mL), extracted with EtOAc (2 mL) and analyzed by GCMS. Trace of **1** was detected.

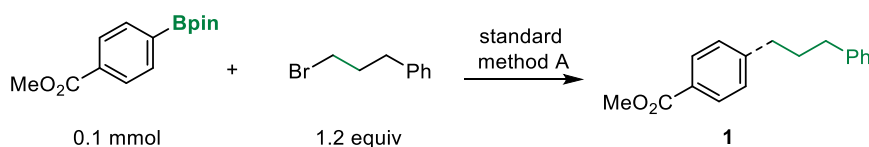

To a flame-dried tube with a stir bar was added methyl 4-(4,4,5,5-tetramethyl-1,3,2-dioxaborolan-2-yl)benzoate (0.1 mmol, 1.0 equiv), NiBr<sub>2</sub>(dtbbpy) (4 mg, 8 mol %). The tube was transferred into an N<sub>2</sub>-filled glovebox, B<sub>2</sub>pin<sub>2</sub> (38 mg, 0.15 mmol, 1.5 equiv), NaI (7.5 mg, 0.05 mmol, 0.5 equiv) and K<sub>2</sub>CO<sub>3</sub> (25 mg, 0.18 mmol, 1.8 equiv) were added. The tube was sealed, removed from the glovebox and charged with DMA (0.5 mL). The mixture was stirred vigorously, (4-bromobutyl)benzene (0.12 mmol, 1.2 equiv) was added to the tube. The mixture was stirred vigorously at 60 °C for 24 h. After that, the reaction was quenched with water (2 mL), extracted with EtOAc (2 mL) and analyzed by GCMS. Trace of **1** was detected.

### 2. Radical clock reaction

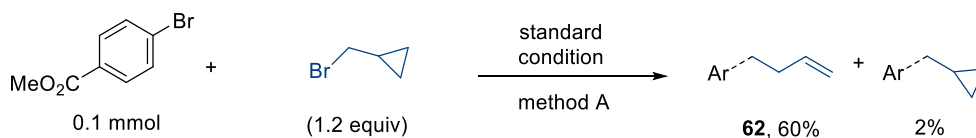

To a flame-dried tube charged with a stir bar was added methyl 4-bromobenzoate (21.5 mg, 0.1 mmol, 1.0

equiv), NiBr<sub>2</sub>(dtbbpy) (4 mg, 8 mol %). The tube was transferred into an N<sub>2</sub>-filled glovebox, B<sub>2</sub>pin<sub>2</sub> (38 mg, 0.15 mmol, 1.5 equiv), NaI (7.5 mg, 0.05 mmol, 0.5 equiv) and K<sub>2</sub>CO<sub>3</sub> (25 mg, 0.18 mmol, 1.8 equiv) were added. The tube was sealed, removed from the glovebox and charged with DMA (0.5 mL). The mixture was stirred vigorously, (bromomethyl)cyclopropane (0.12 mmol, 1.2 equiv) was added to the tube. The mixture was stirred vigorously at 60 °C for 24 h. After that, the reaction mixture was quenched with water (10 mL), extracted with EtOAc (3 x 15 mL). The combined organic layers were washed with brine (2 x 10 mL), dried with MgSO<sub>4</sub>, filtered, and concentrated under reduced pressure. The residue was purified by chromatography on silica gel, eluting with ethyl acetate/petroleum ether to give the target molecular. The yield was determined by <sup>1</sup>H NMR (using 2,5-dimethylfuran as the internal standard).

### 3. Radical-chain experiment

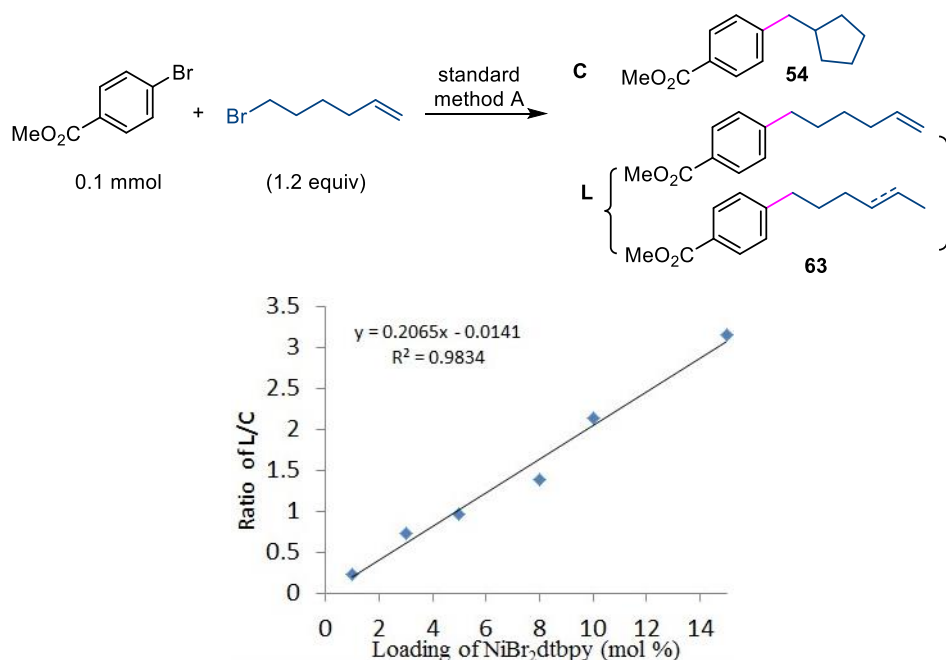

**Figure S0.** Linear Dependence of the ratio of L/C on the concentration of (dtbbpy)NiBr<sub>2</sub>.

(1) Similar to the literature procedure,<sup>5-6</sup> the following solution was prepared.

Solution 1: NiBr<sub>2</sub>(dtbbpy) (48.4 mg, 0.1 mmol) was dissolved in 2 mL of DMA giving a Ni solution of 0.05 M. For each catalyst loading, namely 1 mol %, 3.0 mol %, 5 mol %, 8 mol %, 10 mol % and 15 mol %, the corresponding volumes of solution **1** were 20 μL, 60 μL, 100 μL, 160 μL, 200 μL and 300 μL, respectively.

(2) To a flame-dried tube equipped with a stir bar was added a methyl 4-bromobenzoate (21.5 mg, 0.1 mmol,



1.0 equiv). The tube was transferred into an N<sub>2</sub>-filled glovebox, to which B<sub>2</sub>pin<sub>2</sub> (38 mg, 0.15 mmol, 1.5 equiv), NaI (7.5 mg, 0.05 mmol, 0.5 equiv) and K<sub>2</sub>CO<sub>3</sub> (25 mg, 0.18 mmol, 1.8 equiv) were added. After a measured volume of solution **1** containing NiBr<sub>2</sub>(dtbbpy) in DMA was injected via a syringe, didodecane (internal standard, 22 μL, 0.1 mmol) and 6-bromohex-1-ene (0.13 mmol, 1.2 equiv) were injected via syringes. The reaction mixture was adjusted to 0.5 mL by addition of corresponding volumes of DMA. Then the mixture was allowed to stir at 60 °C for 24 h under N<sub>2</sub> atmosphere. The reaction was quenched by 2 mL of H<sub>2</sub>O, followed by extraction with 2 mL of diethyl ether. The organic layer was taken and transferred to a GC sampling tube via a pipette, and analyzed by GC.

Following the reaction conditions for method A on a 0.10 mmol scale using different catalyst loading (1 mol%, 3 mol%, 5 mol, 8 mol%, 10 mol% and 15 mol%). The results are in favor of a radical chain mechanism as a linear dependence of ratios of L/C on the catalyst loading was observed.

#### 4. Reduction of (dtbbpy)Ni(II)Br<sub>2</sub> (Ni-a) to Ni(0) and preparation of Ni-b

(1) In situ formation of Ni-b

a. In the presence of alkyl-Br:

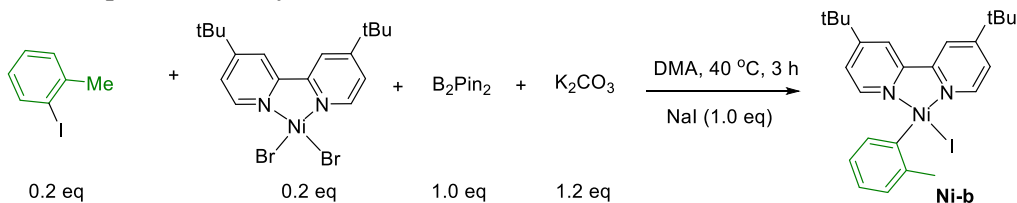

To a flame-dried tube with a stir bar was added NiBr<sub>2</sub>(dtbbpy) (9.7 mg, 20 mol %). The tube was transferred into an N<sub>2</sub>-filled glovebox, B<sub>2</sub>pin<sub>2</sub> (25 mg, 0.1 mmol, 1.0 equiv), NaI (15 mg, 1.0 equiv) and K<sub>2</sub>CO<sub>3</sub> (18 mg, 1.2 equiv) were added. The tube was sealed, removed from the glovebox and charged with DMA (0.5 mL). The mixture was stirred vigorously, methyl 1-iodo-2-methylbenzene (21.8 mg, 0.1 mmol, 1.0 equiv) and 1-bromododecane (1.2 equiv) were added to the tube. The mixture was stirred vigorously at 40 °C for 3 h. After that, the reaction mixture was filtered through a syringe filter in N<sub>2</sub>-filled glovebox and the resultant homogenous solution was used to obtain a non-deuterated solvent (non-D) <sup>1</sup>H NMR spectrum (Figure S1-a).

b. in the absence of alkyl-Br

To a flame-dried tube with a stir bar was added  $\text{NiBr}_2(\text{dtbbpy})$  (9.7 mg, 0.02 mmol). The tube was transferred into an  $\text{N}_2$ -filled glovebox,  $\text{B}_2\text{Pin}_2$  (25 mg, 0.1 mmol, 1.0 equiv),  $\text{NaI}$  (15 mg, 1.0 equiv) and  $\text{K}_2\text{CO}_3$  (18 mg, 1.2 equiv) were added. The tube was sealed, removed from the glovebox and charged with DMA (0.5 mL). The mixture was stirred vigorously, methyl 1-iodo-2-methylbenzene (4.4 mg, 0.02 mmol, 0.2 equiv) was added to the tube. The mixture was stirred vigorously at 40 °C for 3 h. After that, the reaction mixture was filtered through a syringe filter in  $\text{N}_2$ -filled glovebox and the resultant homogenous solution was used directly to obtain a non-deuterated solvent (non-D)  $^1\text{H}$  NMR spectrum (Figure S1-b).

### c. preformed Ni-b in DMA

Based on the  $^1\text{H}$  NMR spectrum, **Ni-b** is formed whose characteristic peaks are in agreement with those for the pre-prepared **Ni-b** complex in non-D DMA (Figure S1-c).<sup>6</sup>

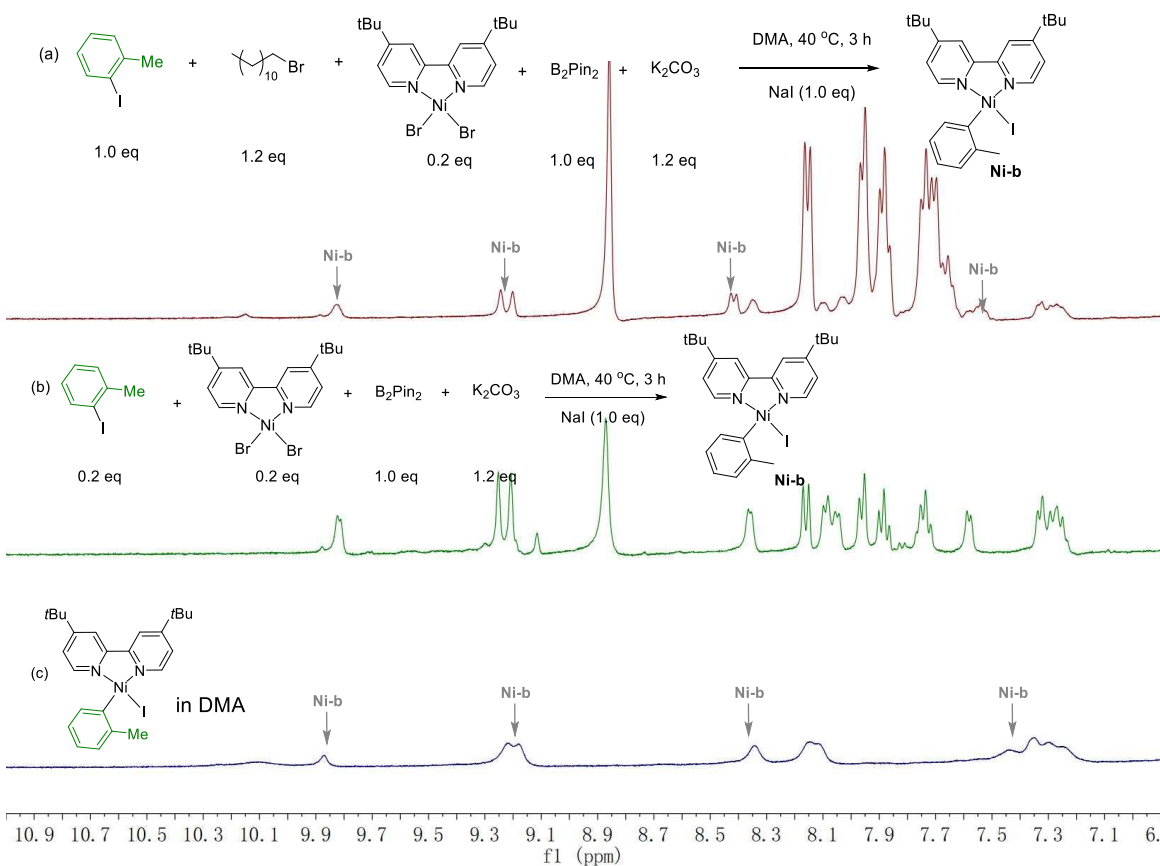

**Figure S1**  $^1\text{H}$  NMR spectra of the reaction mixture of  $(\text{dtbbpy})\text{NiBr}_2$ ,  $\text{B}_2\text{Pin}_2$ ,  $\text{Ar}^1\text{-I}$ , in the presence or absence of  $n\text{C}_{12}\text{H}_{25}\text{Br}$ . (a) in the presence of  $n\text{C}_{12}\text{H}_{25}\text{Br}$ ; (b) in the absence of  $n\text{C}_{12}\text{H}_{25}\text{Br}$ ; (c) pre-prepared **Ni-b** in DMA. Note: Full spectra of the reaction mixture and Ni complexes are available on Page S115-S116.

We also attempted to quantify the yields of Ni-b using triazine as the internal standard. A characteristic peak of triazine in DMA using non-D NMR technique was set at 9.96 ppm (Figure S2). The molar ratio of triazine to Ni-b was determined by the ratio of the peak of triazine at 9.96 to that of the doublet of Ni-b from 9.2-9.3 ppm (Figure S3). Accordingly, the yields for the reactions at Figure 5e (also as below in Figure S3) were determined to be 12% (with  $n\text{C}_{12}\text{H}_{25}\text{Br}$ ) and 51% (without  $n\text{C}_{12}\text{H}_{25}\text{Br}$ ), respectively. Full spectra of the reaction mixture and Ni complexes of Figures S2-S4 are available on Page S116-S118.

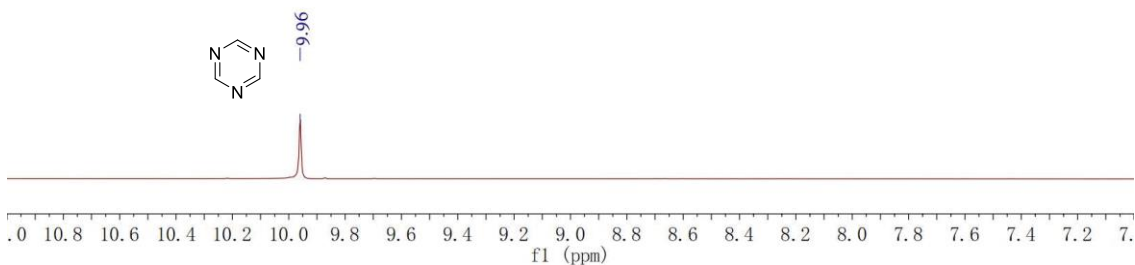

**Figure S2.** The  $^1\text{H}$  NMR peak of triazine in DMA obtained with a non-D NMR technique.

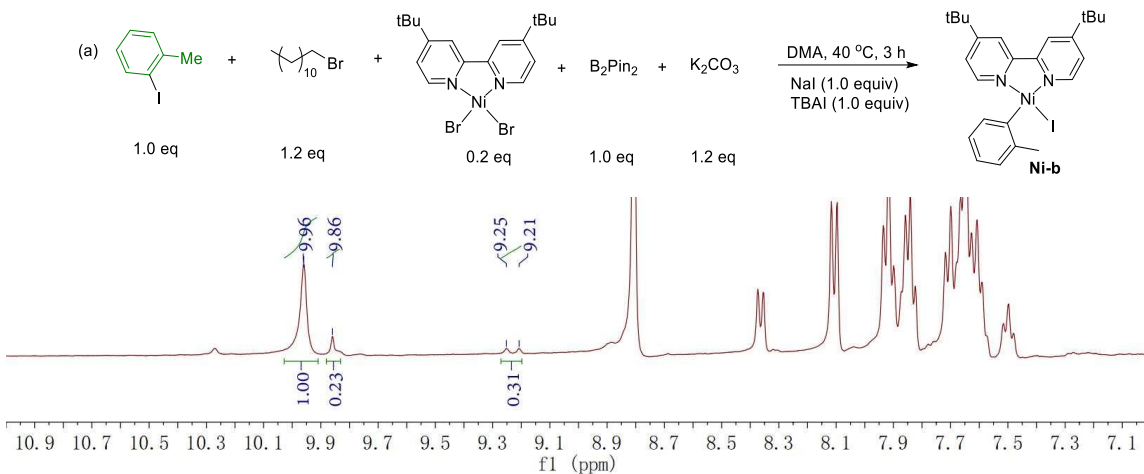

**Figure S3.**  $^1\text{H}$  NMR spectra of the reaction mixture of  $(\text{dtbbpy})\text{NiBr}_2$ ,  $\text{B}_2\text{Pin}_2$ ,  $\text{Ar}^1\text{-I}$ , in the presence or absence of  $n\text{C}_{12}\text{H}_{25}\text{Br}$ . Note: 1,3,5-triazine was added after reaction the reaction was run for 3 hours.

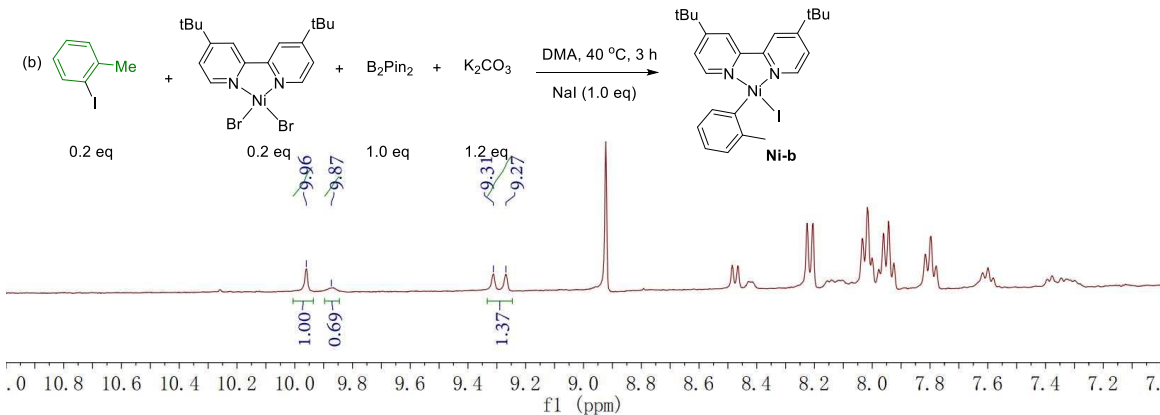

**Figure S4.**  $^1\text{H}$  NMR spectra of the reaction mixture of  $(\text{dtbbpy})\text{NiBr}_2$ ,  $\text{B}_2\text{Pin}_2$ ,  $\text{Ar}^1\text{-I}$ , in the presence or absence of  $n\text{C}_{12}\text{H}_{25}\text{Br}$ . Note: 1,3,5-triazine was added after reaction the reaction was run for 3 hours.

(2) In situ formation of Ni-c in the presence or absence of alkyl-Br

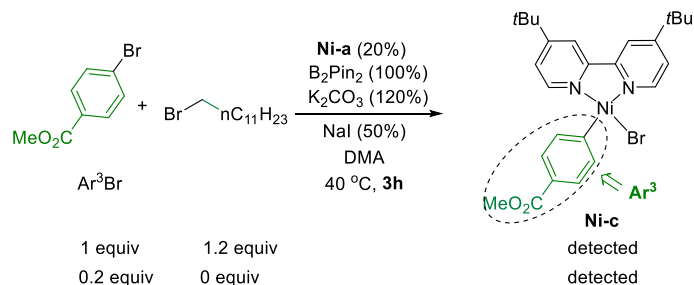

To a flame-dried tube with a stir bar was added 4-bromobenzoate (0.1 mmol, 1.0 equiv) and  $\text{NiBr}_2(\text{dtbbpy})$  (9.7 mg, 20 mol %). The tube was transferred into an  $\text{N}_2$ -filled glovebox,  $\text{B}_2\text{pin}_2$  (25 mg, 0.1 mmol, 1.0 equiv), NaI (15 mg, 1.0 equiv) and  $\text{K}_2\text{CO}_3$  (18 mg, 1.2 equiv) were added. The tube was sealed, removed from glovebox and charged with DMA (0.5 mL). After 1-bromododecane (1.2 equiv if applicable) was added to the tube, the mixture was stirred vigorously at 40 °C for 3 h. After that, a solution was obtained for (non-D)  $^1\text{H}$  NMR studies upon filtering the reaction mixture through a syringe filter in glovebox.

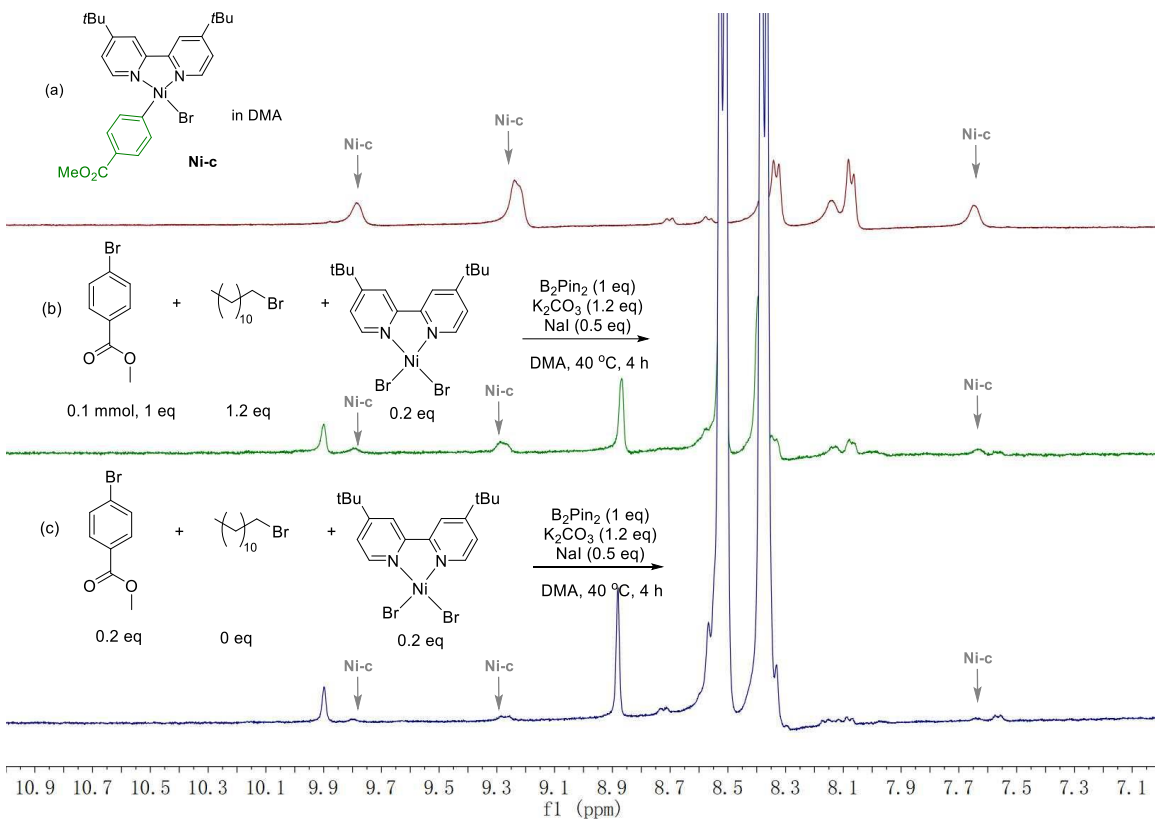

**Figure S5.**  $^1\text{H}$  NMR spectra of the reaction mixture of  $(\text{dtbbpy})\text{NiBr}_2$ ,  $\text{B}_2\text{Pin}_2$ ,  $\text{Ar}^2\text{-Br}$ , in the presence  $n\text{C}_{12}\text{H}_{25}\text{Br}$ . (a) pre-prepared Ni-c in DMA; (b) 0.2 equiv of **S2** and  $n\text{C}_{12}\text{H}_{25}\text{Br}$ ; (c) 1 equiv of **S2** and 1.2 equiv of  $n\text{C}_{12}\text{H}_{25}\text{Br}$ . Note: Full spectra of the reaction mixture and Ni complexes are available on Page S118-S119

Based on the  $^1\text{H}$  NMR spectrum, **Ni-c** formed in the absence (Figure S5-a) and presence (Figure S5-b) of alkyl bromide whose characteristic peaks are in agreement with those for the pre-prepared **Ni-c** complex (Figure S2-c) in non-D DMA.

(3) Reduction of  $(\text{dtbbpy})\text{Ni}(\text{II})\text{Br}_2$  (**Ni-a**) to  $\text{Ni}(0)$

To a flame-dried tube equipped with a stir bar was added  $\text{NiBr}_2(\text{dtbbpy})$  (9.7 mg, 20 mol %). The tube was transferred into an  $\text{N}_2$ -filled glovebox,  $\text{B}_2\text{pin}_2$  (25 mg, 0.1 mmol, 1.0 equiv),  $\text{NaI}$  (15 mg, 1.0 equiv) and  $\text{K}_2\text{CO}_3$  (18 mg, 1.2 equiv) were added. The tube was sealed, removed from the glovebox and charged with DMA (0.5 mL). The mixture was stirred vigorously. After COD (1.0 equiv) was added to the reaction mixture, it was stirred vigorously at  $40^\circ\text{C}$  for 3 h. After that, the reaction mixture was filtered through a syringe filter in  $\text{N}_2$ -filled glovebox and the resultant homogenous solution was used directly to obtain a non-deuterated solvent (non-D)  $^1\text{H}$  NMR spectrum.

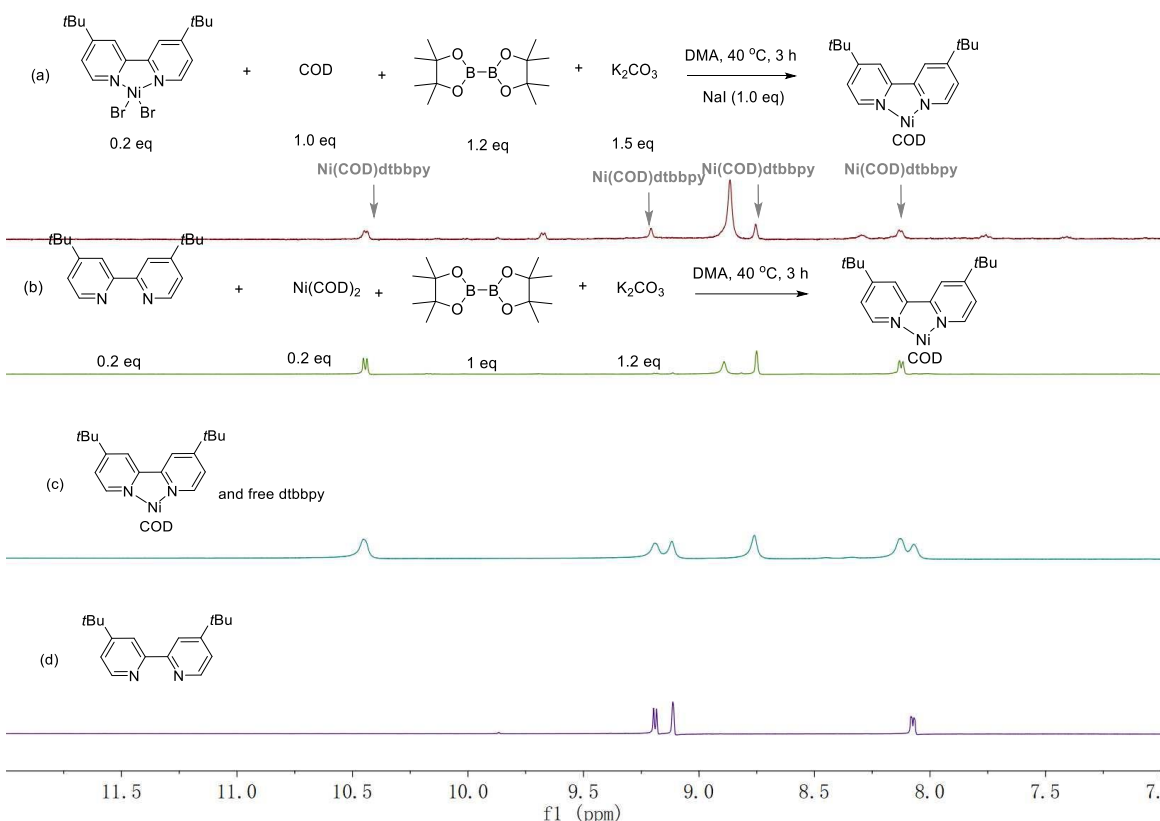

**Figure S6** Reduction of  $(\text{dtbbpy})\text{NiBr}_2$  with  $\text{B}_2\text{Pin}_2$  in the absence of  $\text{Ar}^1\text{-I}$ . (a) reaction of  $(\text{dtbbpy})\text{NiBr}_2$  with  $\text{B}_2\text{Pin}_2$  and COD; (b) reaction of  $(\text{dtbbpy})\text{Ni}(0)(\text{COD})$  with  $\text{B}_2\text{Pin}_2$ ; (c)  $(\text{dtbbpy})\text{Ni}(0)(\text{COD})$  in DMA; (d)  $\text{dtbbpy}$  in DMA. Note: Full spectra of the reaction mixture and Ni complexes are available on Page S119-S121.

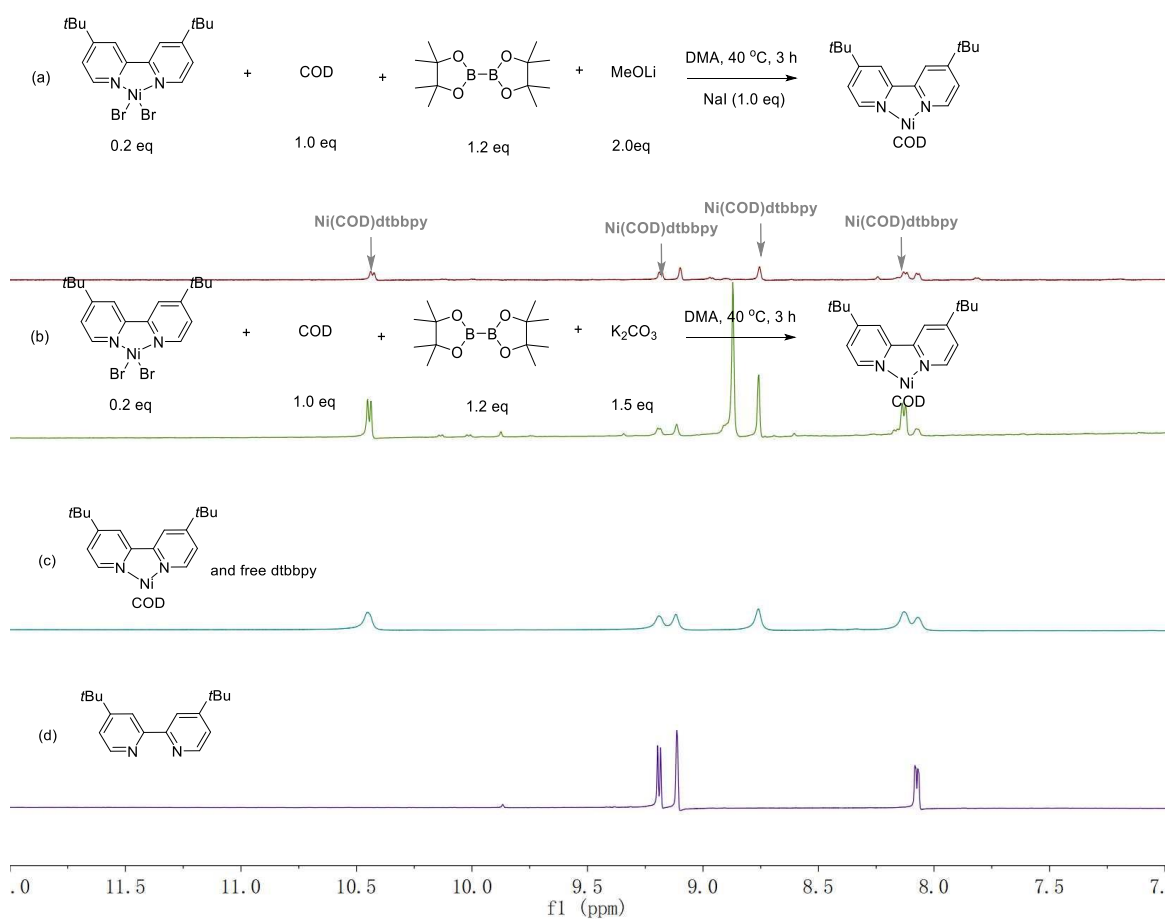

**Figure S7.** Similar to the conditions run in Figure S6. (a) reaction of (dtbbpy)NiBr<sub>2</sub> with B<sub>2</sub>Pin<sub>2</sub>, MeOLi, NaI and COD; (b) reaction of (dtbbpy)NiBr<sub>2</sub> with B<sub>2</sub>Pin<sub>2</sub>, K<sub>2</sub>CO<sub>3</sub> and COD; (c) (dtbbpy)Ni(0)(COD) in DMA; (d) dtbbpy in DMA.

## 5. Stoichiometric competition reaction

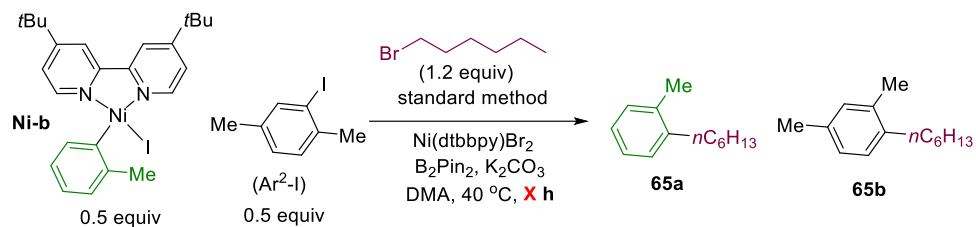

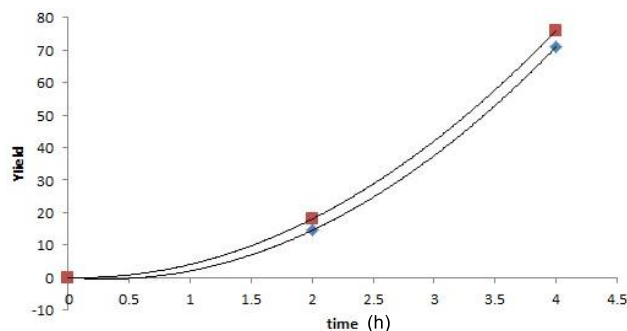

To a flame-dried tube with a stir bar was added  $\text{NiBr}_2(\text{dtbbpy})$  (4 mg, 8 mol %). The tube was transferred into an  $\text{N}_2$ -filled glovebox,  $\text{B}_2\text{pin}_2$  (38 mg, 0.15 mmol, 1.5 equiv),  $\text{NaI}$  (30 mg, 2.0 equiv), **Ni-b** (27.2 mg, 0.05 mmol) and  $\text{K}_2\text{CO}_3$  (25 mg, 1.8 equiv) were added. The tube was sealed, removed from the glovebox and charged with DMA (0.5 mL). The mixture was stirred vigorously, 1-iodo-2,4-dimethylbenzene (11.6 mg, 0.05 mmol) and 1-bromohexane (1.2 equiv) were added to the tube. The mixture was stirred vigorously at 40 °C for 2 h or 4 h. The reaction was quenched by 2 mL of  $\text{H}_2\text{O}$ , followed by extraction with 2 mL of diethyl ether. The organic layer was taken and transferred to a GC sampling tube via a pipette, and analyzed by GC.

#### 6. The stability of Ni-b in DMA in the presence of $\text{B}_2\text{Pin}_2$

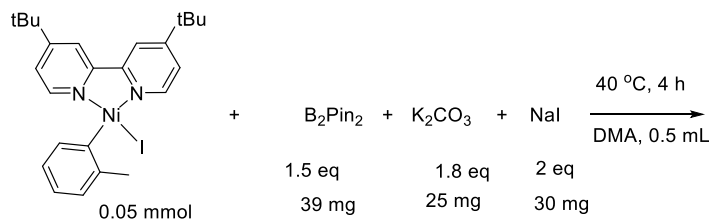

To a flame-dried tube with a stir bar was transferred into an  $\text{N}_2$ -filled glovebox,  $\text{B}_2\text{pin}_2$  (39 mg, 0.15 mmol, 1.5 equiv),  $\text{NaI}$  (30 mg, 2.0 equiv), **Ni-b** (27.2 mg, 0.05 mmol),  $\text{NiBr}_2(\text{dtbbpy})$  (4 mg, 8 mol %, if needed) and  $\text{K}_2\text{CO}_3$  (25 mg, 1.8 equiv) were added. The tube was sealed, removed from the glovebox and charged with DMA (0.5 mL). The mixture was stirred vigorously at 40 °C for 4 h. After that, the reaction mixture was filtered through a syringe filter in  $\text{N}_2$ -filled glovebox and the resultant homogenous solution was used directly to obtain a non-deuterated solvent (non-D)  $^1\text{H}$  NMR spectrum.

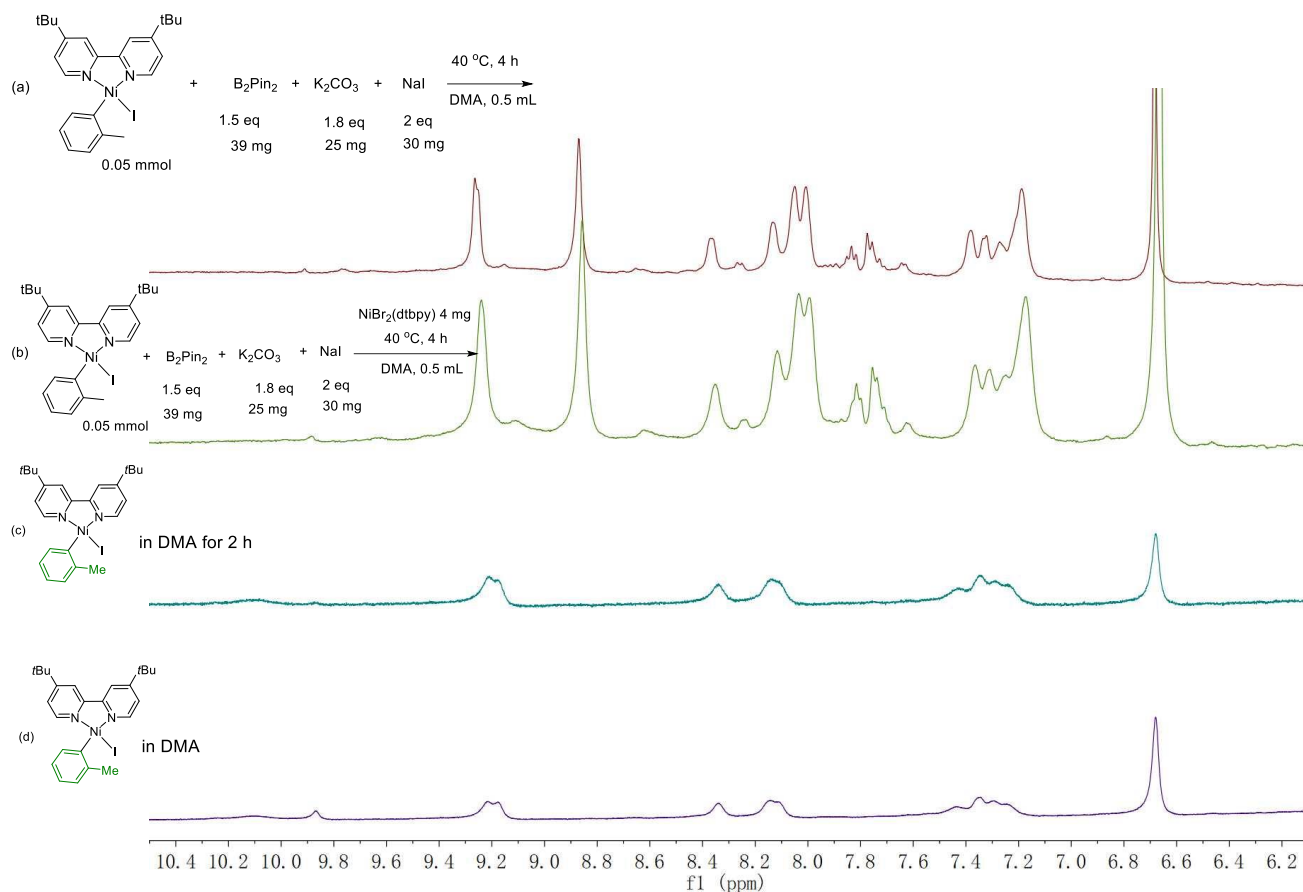

**Figure S8.**  $^1\text{H}$  NMR spectra of the stability of **Ni-b** in DMA in the presence of  $\text{B}_2\text{Pin}_2/\text{K}_2\text{CO}_3/\text{NaI}$ . (a) without  $(\text{dtbpy})\text{NiBr}_2$ ; (b) with  $(\text{dtbpy})\text{NiBr}_2$ ; (c) **Ni-b** in DMA for 2 hours at 40 °C; (d) **Ni-b** in DMA for 10 min at rt. Note: Full spectra of the reaction mixture and Ni complexes are available on Page S121-S122.

### 7. $^1\text{H}$ NMR spectra of the reaction mixture of $[\text{Ni-d}]_2$ with $\text{Ar}^1\text{-I}$ and $\text{B}_2\text{Pin}_2$

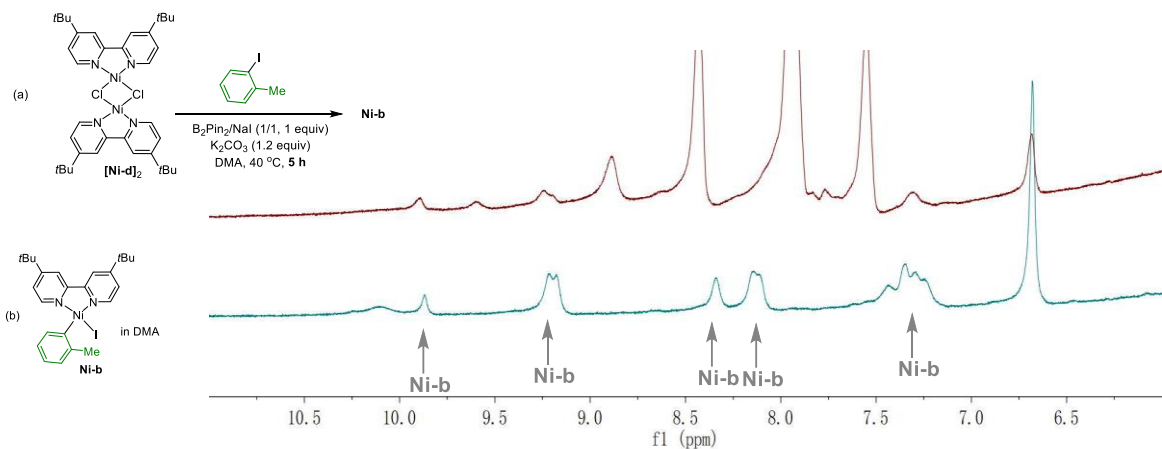



**Figure S9** Reduction of Ni(I) complex  $[\text{Ni-d}]_2$  with  $\text{B}_2\text{Pin}_2$  in the presence of  $\text{Ar}^1\text{-I}$ . (a) A mixture of  $[\text{Ni-d}]_2$  and  $\text{B}_2\text{Pin}_2$  and  $\text{Ar}^1\text{-I}$ ; (b) **Ni-b** in DMA. Note: Full spectra of the reaction mixture and Ni complexes are available on Page S106-S114.

We observed that the reaction of  $[(\text{dtbbpy})\text{Ni}^1\text{Cl}]_2$  (**Ni-d**) with  $\text{Ar}^1\text{I}$  produced the complex **Ni-b** in detectable NMR yield (Figure S5). Although the detail of this transformation is not clear, it suggests that  $\text{L}_n\text{Ni}^1$  can be consumed upon treatment with  $\text{ArX}$  in the presence of  $\text{B}_2\text{Pin}_2$ .

## Part 7. Kinetic studies<sup>19</sup>

### 1. General Method for Kinetic Studies:

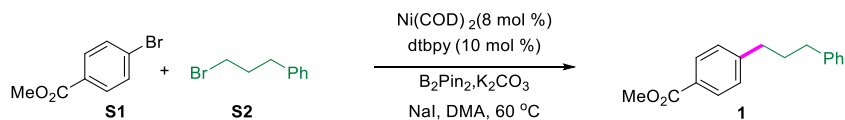

- Tube 1: To a flame-dried tube equipped with a stir bar was loaded with 4-bromobenzoate (86 mg, 0.4 mmol, 1.0 equiv),  $\text{B}_2\text{pin}_2$  (152.4 mg, 0.6 mmol, 1.5 equiv),  $\text{K}_2\text{CO}_3$  (99.5 mg, 0.72 mmol, 1.8 equiv), and sodium iodide (30 mg, 0.2 mmol, 0.5 equiv). The tube was sealed with a rubber septum, purged with  $\text{N}_2$ .
- Tube 2: To a second flame-dried flask equipped with a stir bar were added  $\text{Ni}(\text{COD})_2$  (44 mg, 0.16 mmol) and  $\text{dtbbpy}$  (53.7 mg, 0.2 mmol). The tube was sealed with a rubber septum, and purged with  $\text{N}_2$ , to which anhydrous DMA (10 mL) was added and the mixture was stirred at r.t. for 1 h.
- To the tube 1 was added to 2 mL of the Ni solution by a syringe, followed by addition of **S2** (95.6 mg, 0.48 mmol, 1.2 equiv) and dodecane (47  $\mu\text{L}$ ) as an internal standard. The tube was slowly shaken twice to wash down any solids from the walls then placed on a stir plate (at a rate of 1500 rpm). At the appropriate time points, approximately 50  $\mu\text{L}$  of the solution was taken by a syringe (Note: the syringe and its needle were pre-flushed with  $\text{N}_2$ ), which was loaded onto a short silica plug (~ a height of 1 cm) in a plastic pipette packed with cotton, washed with EtOAc (~2 mL) to give a solution that was directly used for GC-MS analysis.

(d) All data runs obtained from the GC-FID instrument were appropriately integrated for the product and the dodecane standard. The integrated data points were further processed by normalizing each product area value by its corresponding standard area value. The normalized areas were then converted to concentration by using calculated response factors obtained from preparing known mixtures of the standard and purified reaction product. Each reaction was analyzed and graphed to show the product concentration (M) as a function of reaction time (min). All data points were plotted with black markers (●) as shown below, while only the data points included in the linear fit are shown with red markers (●). The best-fit linear regression line is shown and the  $y=mx+b$  equation is given.

*Note:* The molar ratio of  $[K_2CO_3] / [B_2Pin_2]$  is 6:5 throughout the kinetic studies.

(e) Tracking the reaction progress for the coupling of **S1** and **S2** with method A:

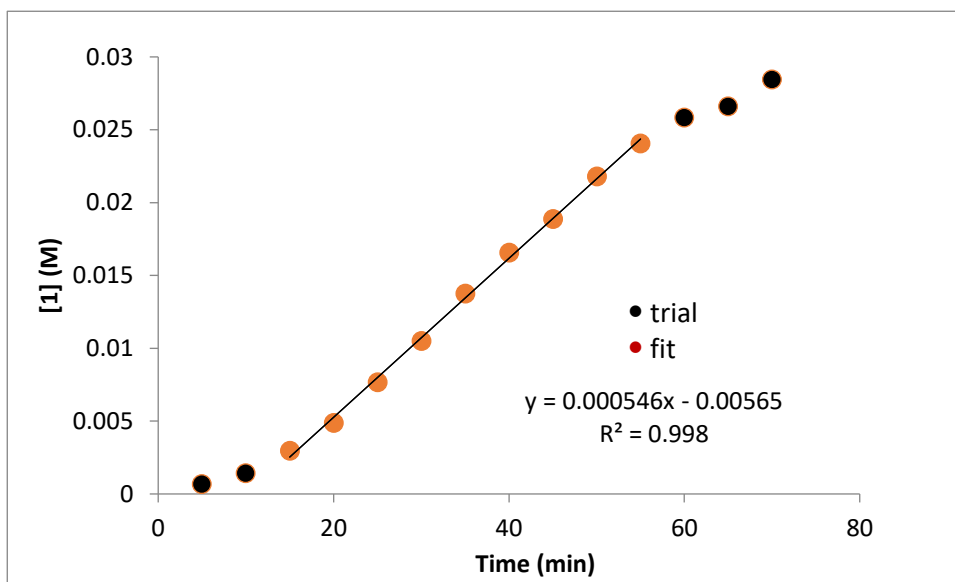

**Figure S10.** Results of standard reaction conditions runs with linear fit regions highlighted:  $[S1]_0 = 0.2M$ ,  $[S2]_0 = 0.24 M$ ,  $[L \cdot Ni] = 0.016 M$ ,  $[B_2Pin_2] = 0.3 M$ .

## 2. Variation of the concentrations of $[L_n\text{-Ni}]$

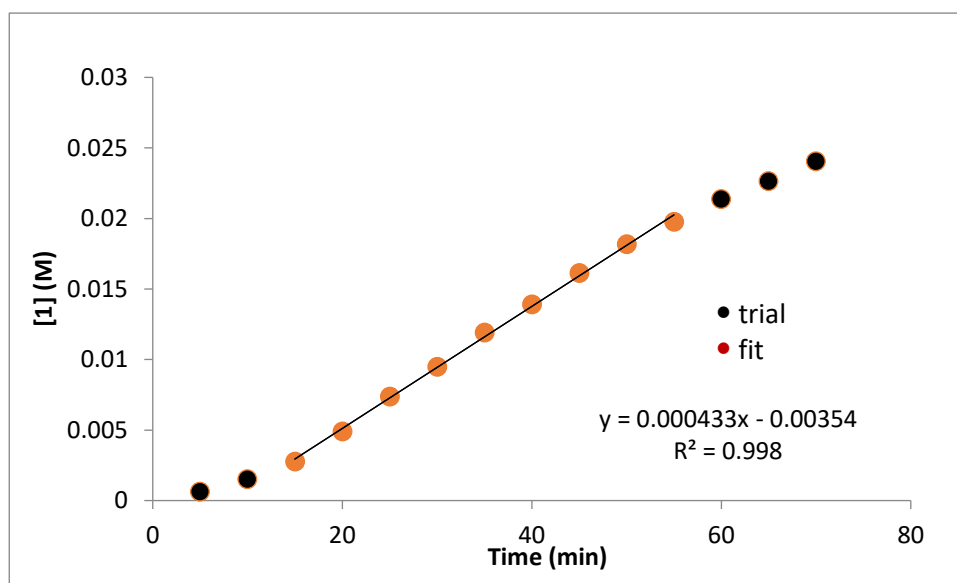

Figure S11.  $[S1]_0 = 0.2$  M,  $[S2]_0 = 0.24$  M,  $[L\cdot Ni] = 0.08$  M,  $[B_2Pin_2] = 0.3$  M.

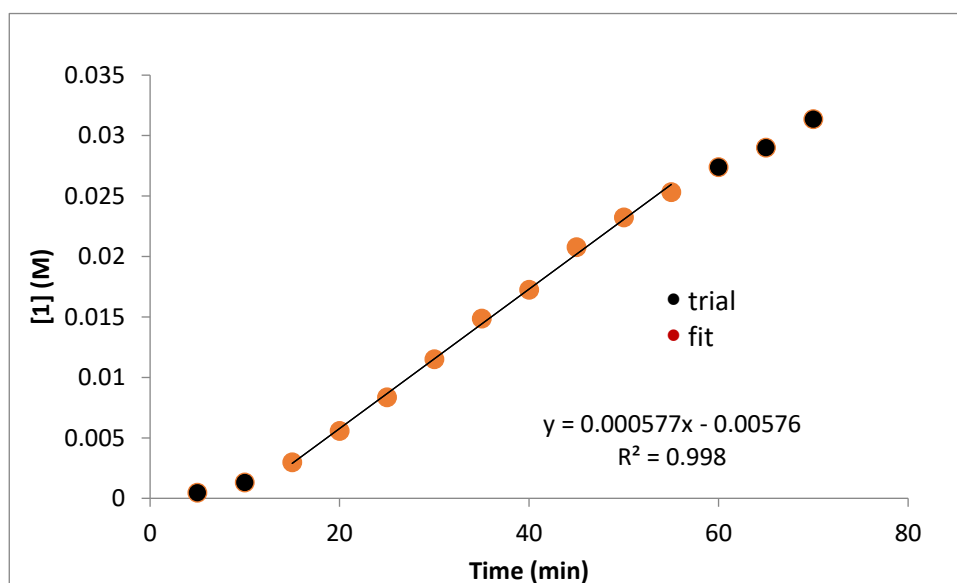

Figure S12.  $[S1]_0 = 0.2$  M,  $[S2]_0 = 0.24$  M,  $[L\cdot Ni] = 0.32$  M,  $[B_2Pin_2] = 0.3$  M.

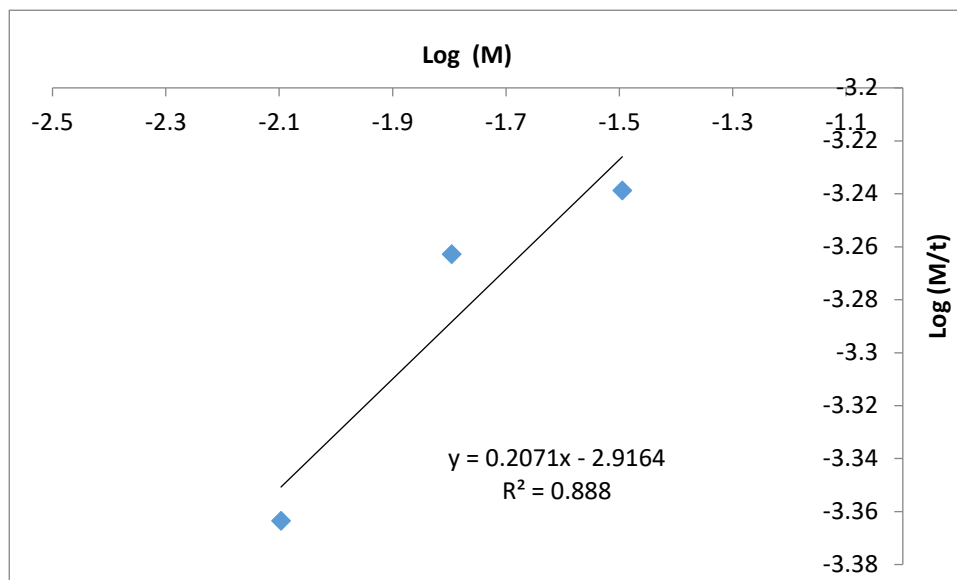

Figure S13. Reaction order of [Ni] for the C(sp<sup>3</sup>)-C(sp<sup>2</sup>) coupling reaction.

### 3. Variation of the concentrations of [B<sub>2</sub>Pin<sub>2</sub> + K<sub>2</sub>CO<sub>3</sub>]

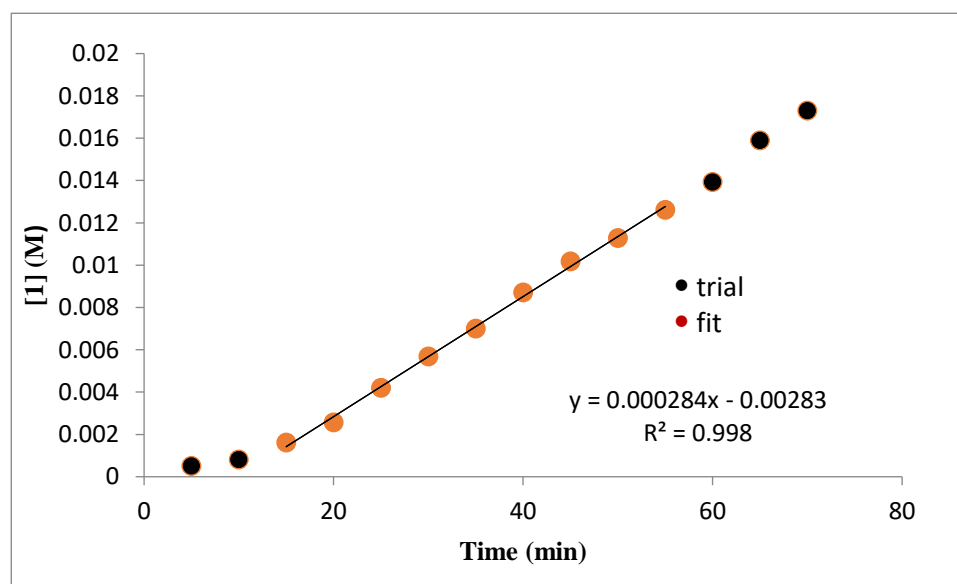

Figure S14. [S1]<sub>0</sub> = 0.2 M, [S2]<sub>0</sub> = 0.24 M, [L·Ni] = 0.16 M, [B<sub>2</sub>Pin<sub>2</sub>] = 0.2 M.

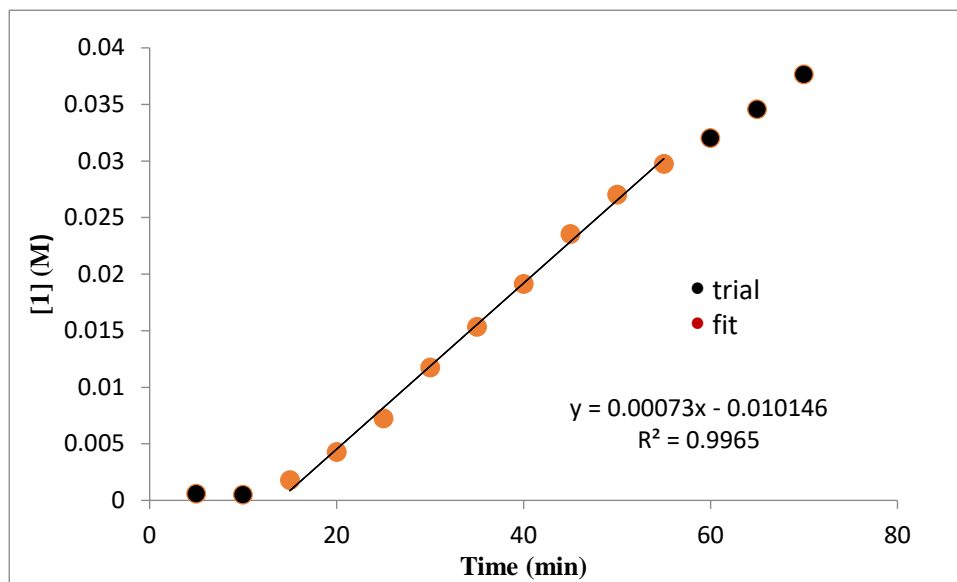

Figure S15.  $[S1]_0 = 0.2$  M,  $[S2]_0 = 0.24$  M,  $[L \cdot Ni] = 0.16$  M,  $[B_2Pin_2] = 0.4$  M.

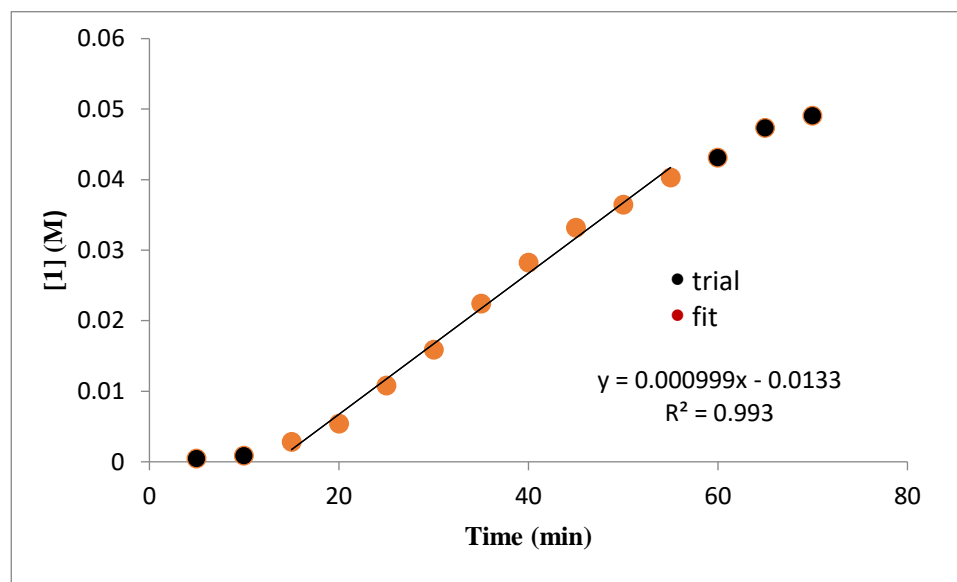

Figure S16.  $[S1]_0 = 0.2$  M,  $[S2]_0 = 0.24$  M,  $[L \cdot Ni] = 0.16$  M,  $[B_2Pin_2] = 0.6$  M.

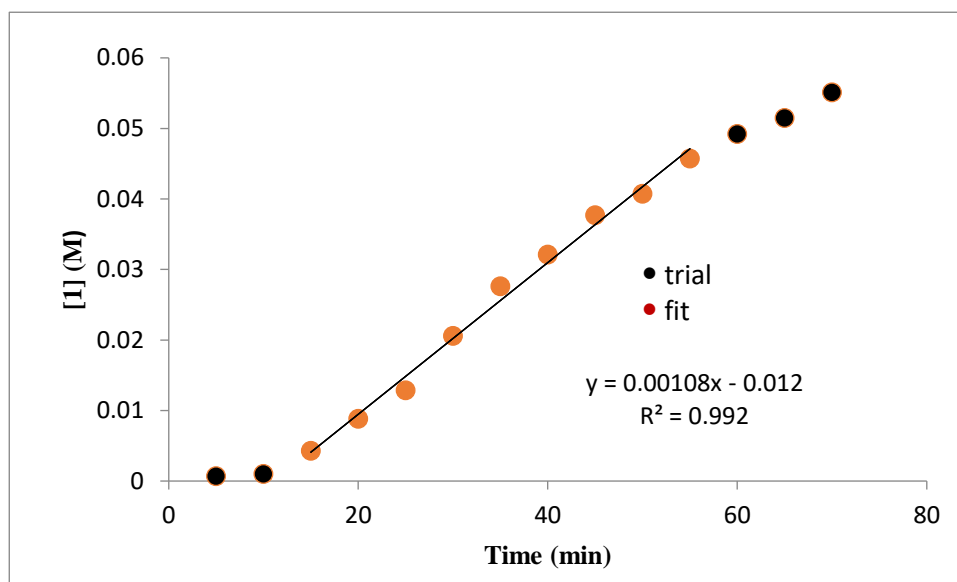

Figure S17.  $[S1]_0 = 0.2$  M,  $[S2]_0 = 0.24$  M,  $[L \cdot Ni] = 0.16$  M,  $[B_2Pin_2] = 0.8$  M.

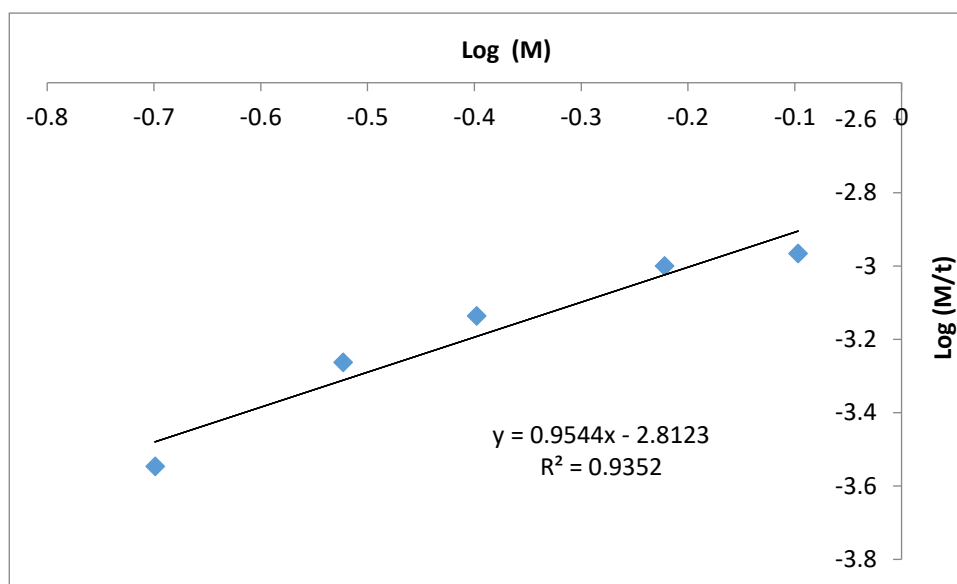

Figure S18. Reaction order of  $[B_2Pin_2]$  for the  $C(sp^3)-C(sp^2)$  coupling reaction.

#### 4. Variation of the concentrations of [S1]

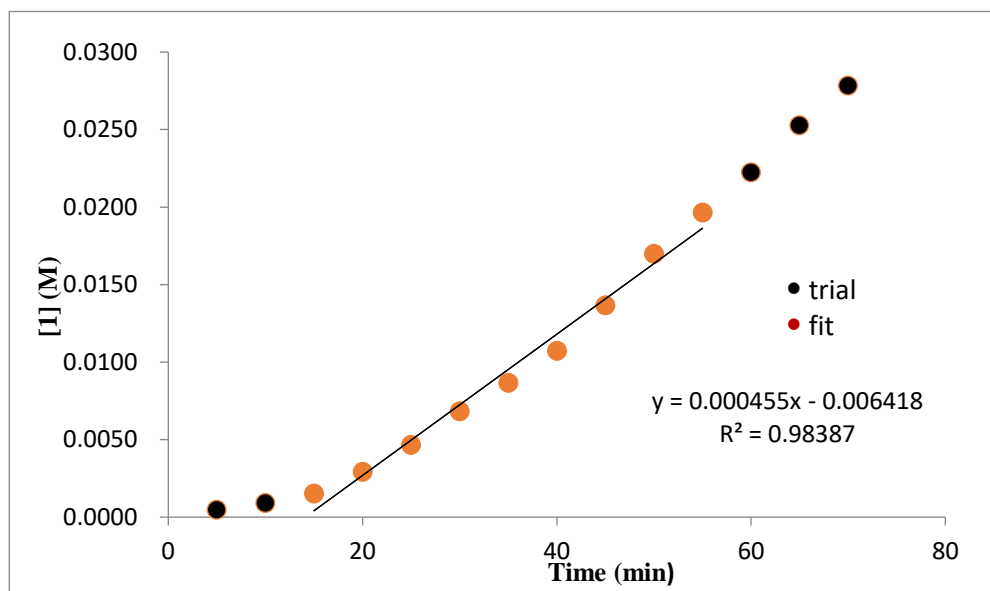

Figure S19.  $[S1]_0 = 0.3$  M,  $[S2]_0 = 0.24$  M,  $[L \cdot Ni] = 0.16$  M,  $[B_2Pin_2] = 0.3$  M.

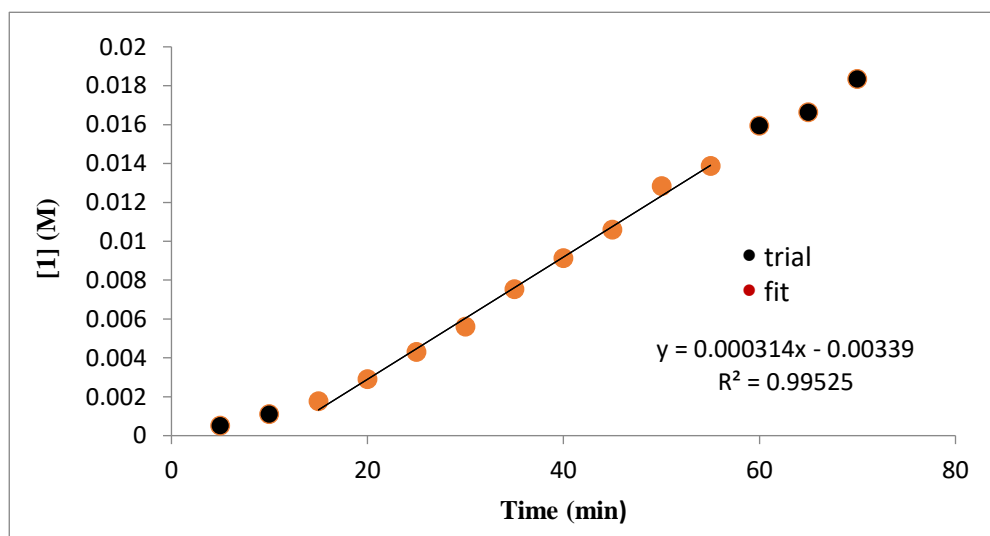

Figure S20.  $[S1]_0 = 0.4$  M,  $[S2]_0 = 0.24$  M,  $[L \cdot Ni] = 0.16$  M,  $[B_2Pin_2] = 0.3$  M.

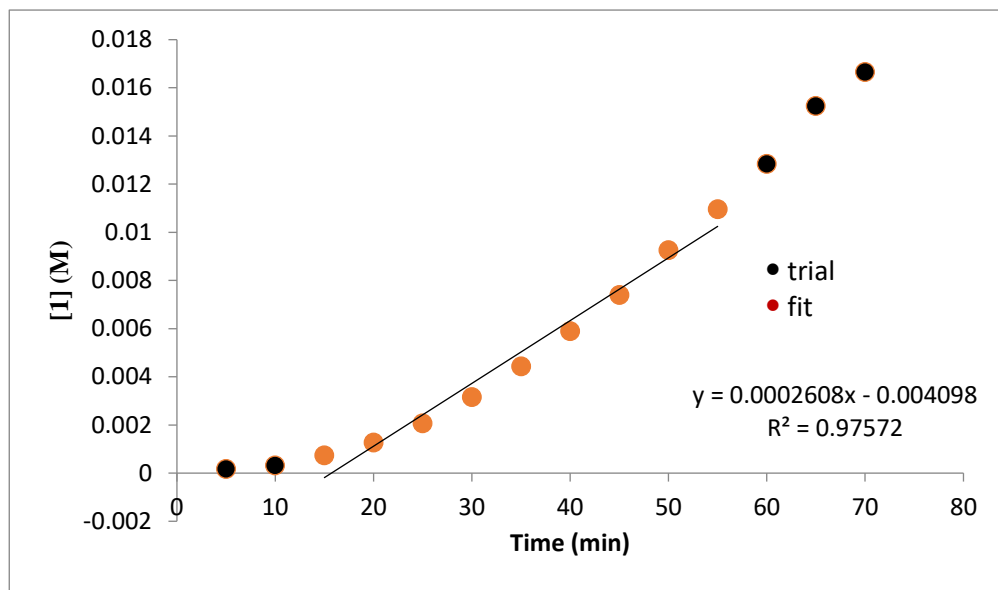

Figure S21.  $[S1]_0 = 0.6 \text{ M}$ ,  $[S2]_0 = 0.24 \text{ M}$ ,  $[L \cdot Ni] = 0.16 \text{ M}$ ,  $[B_2Pin_2] = 0.3 \text{ M}$ .

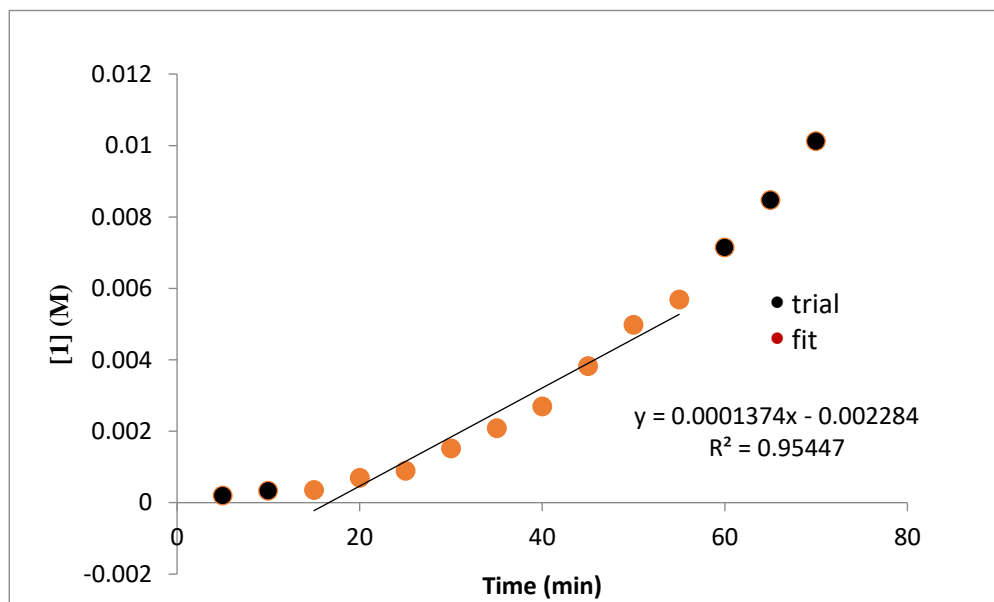

Figure S22.  $[S1]_0 = 0.8 \text{ M}$ ,  $[S2]_0 = 0.24 \text{ M}$ ,  $[L \cdot Ni] = 0.16 \text{ M}$ ,  $[B_2Pin_2] = 0.3 \text{ M}$ .



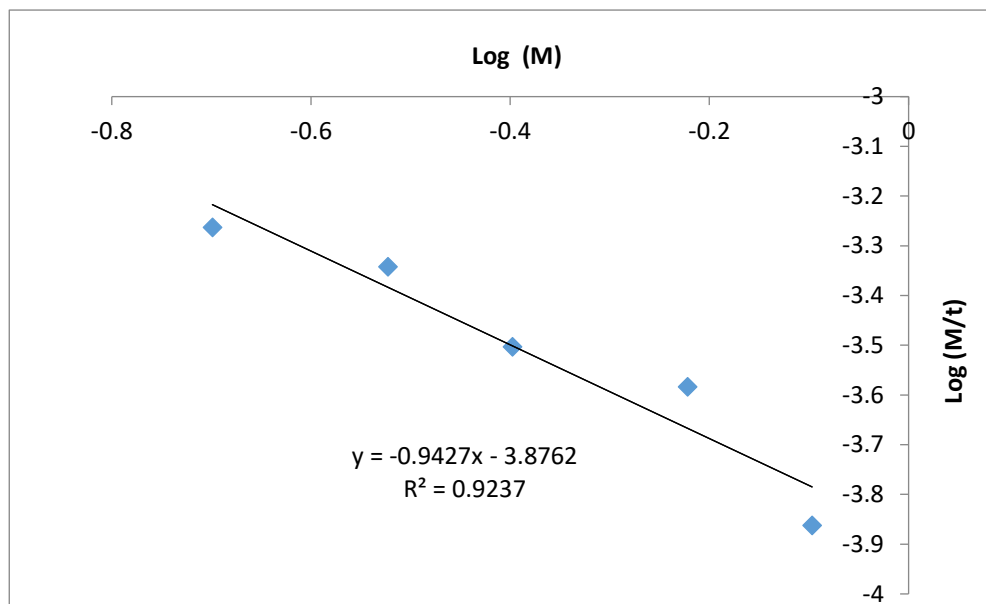

Figure S23. Reaction order of [S1] for the C(sp<sup>3</sup>)-C(sp<sup>2</sup>) coupling reaction.

#### 5. Variation of the concentrations of [S2]

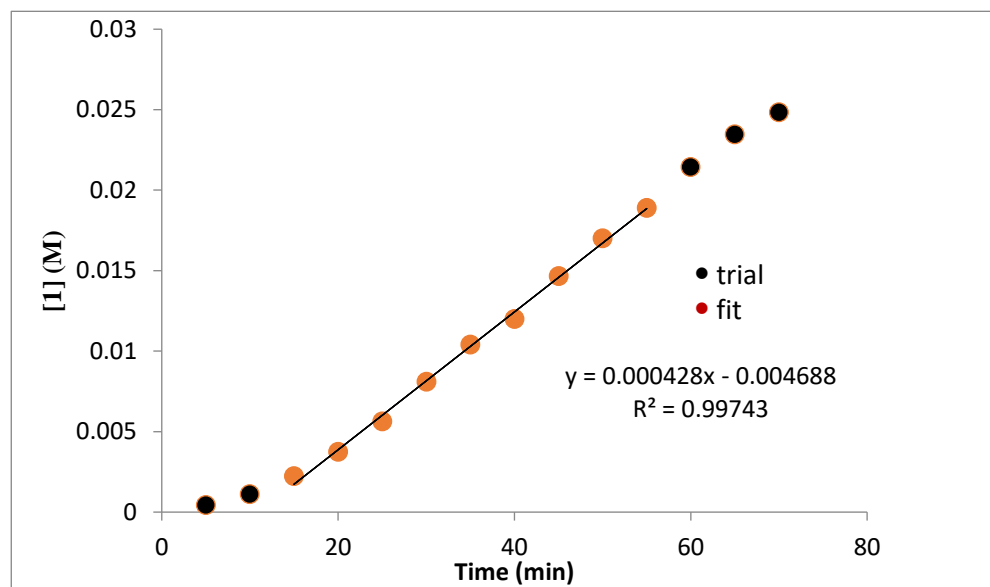

Figure S24. [S1]<sub>0</sub> = 0.2 M, [S2]<sub>0</sub> = 0.36 M, [L·Ni] = 0.16 M, [B<sub>2</sub>Pin<sub>2</sub>] = 0.3 M.

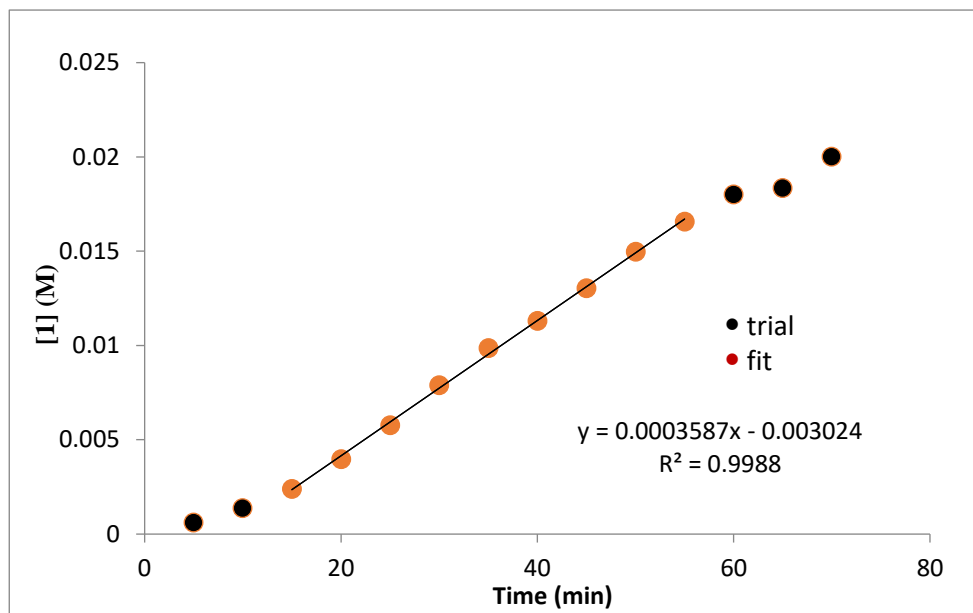

Figure S25.  $[S1]_0 = 0.2$  M,  $[S2]_0 = 0.48$  M,  $[L \cdot Ni] = 0.16$  M,  $[B_2Pin_2] = 0.3$  M.

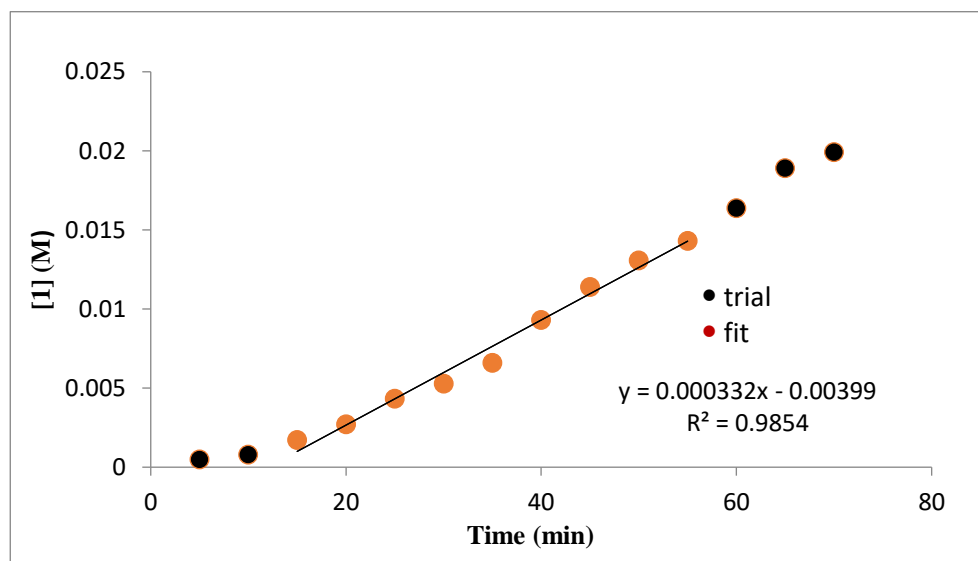

Figure S26.  $[S1]_0 = 0.2$  M,  $[S2]_0 = 0.72$  M,  $[L \cdot Ni] = 0.16$  M,  $[B_2Pin_2] = 0.3$  M.

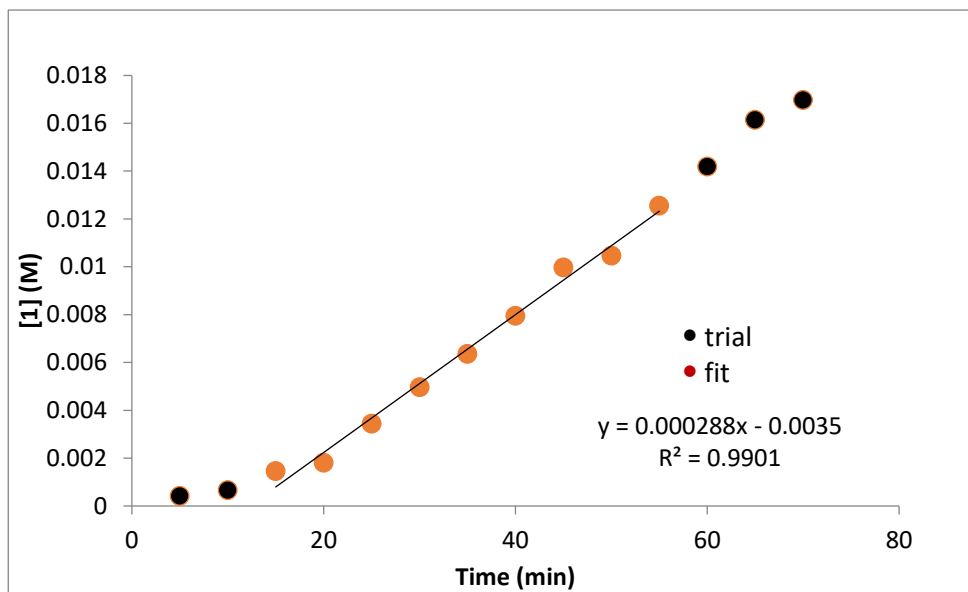

Figure S27.  $[S1]_0 = 0.2 \text{ M}$ ,  $[S2]_0 = 0.96 \text{ M}$ ,  $[L \cdot Ni] = 0.16 \text{ M}$ ,  $[B_2Pin_2] = 0.3 \text{ M}$ .

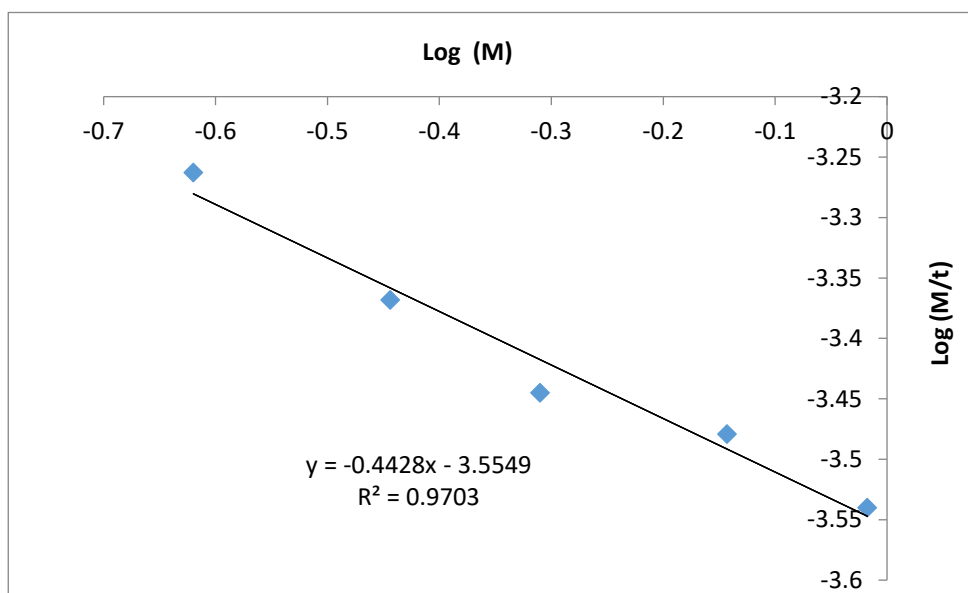

Figure S28. Reaction order of [S2] for the C(sp<sup>3</sup>)-C(sp<sup>2</sup>) coupling reaction.

## II. Reference

1. Anka-Lufford, L. L.; Huihui, K. M.; Gower, N. J.; Ackerman, L. K.; and Weix, D. J. Nickel-Catalyzed Cross-Electrophile Coupling with Organic Reductants in Non-Amide Solvents. *Chem. Eur. J.* **2016**, *22*, 11564.
2. Jezorek, R. L.; Zhang, N.; Leowanawat, P.; Bunner, M. H.; Gutsche, N.; Pesti, A. K. R.; Olsen, J. T.; Percec, V. Air Stable Nickel Precatalysts for Fast and Quantitative Cross Coupling of Aryl Sulfamates with Aryl Neopentylglycolboronates at Room Temperature. *Org. Lett.* **2014**, *16*, 6326.
3. Basch, C. H.; Liao, J. N.; Xu, J. Y.; Piane, J. J.; Watson, M. P. Harnessing Alkyl Amines as Electrophiles for Nickel-Catalyzed Cross Couplings via C–N Bond Activation. *J. Am. Chem. Soc.* **2017**, *139*, 5313.
4. Lin, Q.; Ma, G.; Gong, H. Ni-catalyzed Formal Cross-Electrophile Coupling of Alcohols with Aryl Halides. *Acc. Catal.* **2021**, *11*, 14102.
5. Zhao, C.; Jia, X.; Wang, X.; Gong, H. Ni-Catalyzed Reductive Coupling of Alkyl Acids with Unactivated Tertiary Alkyl and Glycosyl Halides. *J. Am. Chem. Soc.* **2014**, *136*, 17645.
6. Biswas, S.; Weix, D. J. Mechanism and Selectivity in Nickel-Catalyzed Cross-Electrophile Coupling of Aryl Halides with Alkyl Halides. *J. Am. Chem. Soc.* **2013**, *135*, 16192.
7. Perkins, R. J.; Hughes, A. J.; Weix, D. J.; Hansen, E. C. Metal-Reductant-Free Electrochemical Nickel-Catalyzed Couplings of Aryl and Alkyl Bromides in Acetonitrile. *Org. Process Res. Dev.* **2019**, *23*, 1746.
8. Kondolff, I.; Doucet, H.; Santelli, M. Direct Method for Carbon–Carbon Bond Formation: The Functional Group Tolerant Cobalt-Catalyzed Alkylation of Aryl Halides. *Chem. Eur. J.* **2010**, *16*, 5848.
9. Amatore, M.; Gosmini, C. Direct Method for Carbon–Carbon Bond Formation: The Functional Group Tolerant Cobalt-Catalyzed Alkylation of Aryl Halide. *Chem. Eur. J.* **2010**, *16*, 5848.
10. Zeng, Y.; Qian, B.; Li, Y.; Bao, H. A Metal-Free Approach for Brønsted Acid Promoted C–H Alkylation of Heteroarenes with Alkyl Peroxides. *Synthesis* **2018**, *50*, 3250.
11. Lv, L.; Li, C-J. Ruthenium catalyzed  $\beta$ -selective alkylation of vinylpyridines with aldehydes/ketones via  $N_2H_4$  mediated deoxygenative couplings. *Chem. Sci.* **2021**, *12*, 2870.

12. Hansen, E. C.; Li, C.; Yang, S.; Pedro, D.; Weix, D. J. Coupling of Challenging Heteroaryl Halides with Alkyl Halides via Nickel-Catalyzed Cross-Electrophile Coupling. *J. Org. Chem.* **2017**, *82*, 7085.
13. Duan, J.; Du, Y.-F.; Pang, X.; Shu, X.-Z. Ni-catalyzed cross-electrophile coupling between vinyl/aryl and alkyl sulfonates: synthesis of cycloalkenes and modification of peptides. *Chem. Sci.* **2019**, *10*, 8706.
14. Wang, J.; Eehalt, L. E.; Huang, Z.; Beleh, O. M.; Guzei, I. A.; Weix, D. J. Formation of C(sp<sup>2</sup>)-C(sp<sup>3</sup>) Bonds Instead of Amide C-N Bonds from Carboxylic Acid and Amine Substrate Pools by Decarbonylative Cross-Electrophile Coupling. *J. Am. Chem. Soc.* **2023**, *145*, 9951.
15. Luo, S.; Peng, M.; Querard, P.; Li, C.-C.; Li, C.-J. Copper-Catalyzed Conjugate Addition of Carbonyls as Carbanion Equivalent via Hydrazones. *J. Org. Chem.* **2021**, *86*, 13111.
16. Kondolff, I.; Doucet, H.; Santelli, M. Direct Synthesis of Protected Arylacetaldehydes by Tetrakis(phosphane)palladium-Catalyzed Arylation of Ethyleneglycol Vinyl Ether. *Eur. J. Org. Chem.* **2006**, 765.
17. Luridiana, A.; Mazzarella, D.; Capaldo, L.; Rincón, J. A.; García-Losada, P.; Mateos, C.; Frederick, M. O.; Nuño, M.; Jan Buma, W.; Noël, T. The Merger of Benzophenone HAT Photocatalysis and Silyl Radical-Induced XAT Enables Both Nickel-Catalyzed Cross-Electrophile Coupling and 1,2-Dicarbofunctionalization of Olefins. *ACS Catal.* **2022**, *12*, 11216.
18. Yang, G.; Wang, Y.; Qiu, Y. Electroreductive Cross-Electrophile Coupling of Aziridines and Aryl Bromides. *Chem. Eur. J.* **2023**, *29*, e202300959.
19. Turro, R.F.; Wahlman, J. L. H.; Tong, Z. J.; Chen, X.; Yang, M.; Chen, E. P.; Hong, X.; Hadt, R. G.; Houk, K. N.; Yang, Y.-F.; Reisman, S. E. Mechanistic Investigation of Ni-Catalyzed Reductive Cross-Coupling of Alkenyl and Benzyl Electrophiles. *J. Am. Chem. Soc.* **2023**, *145*, 14705.
20. Sun, C.-L.; Krause, H.; Fürstner, A. A Practical Procedure for Iron-Catalyzed Cross-Coupling Reactions of Sterically Hindered Aryl-Grignard Reagents with Primary Alkyl Halides. *Adv. Synth. Catal.* **2014**, *356*, 1281.

### III. NMR Data

#### 1a, <sup>1</sup>H-NMR (600 MHz, CDCl<sub>3</sub>)

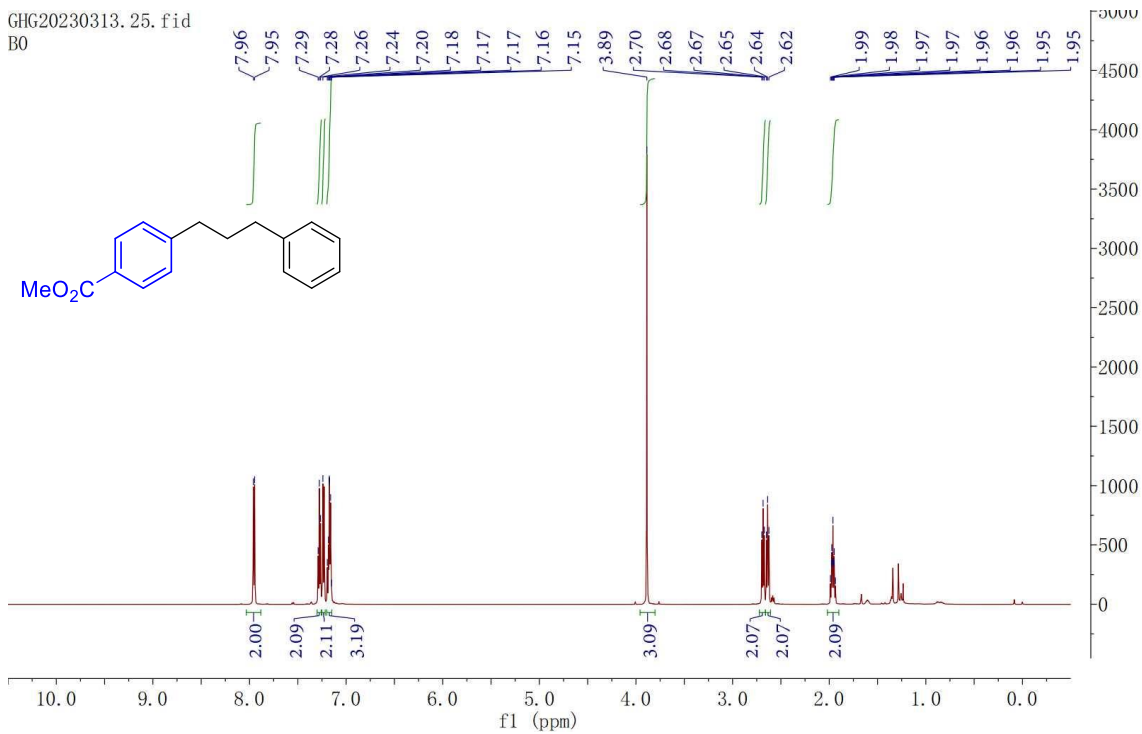

#### 1a, <sup>13</sup>C NMR (151 MHz, CDCl<sub>3</sub>)

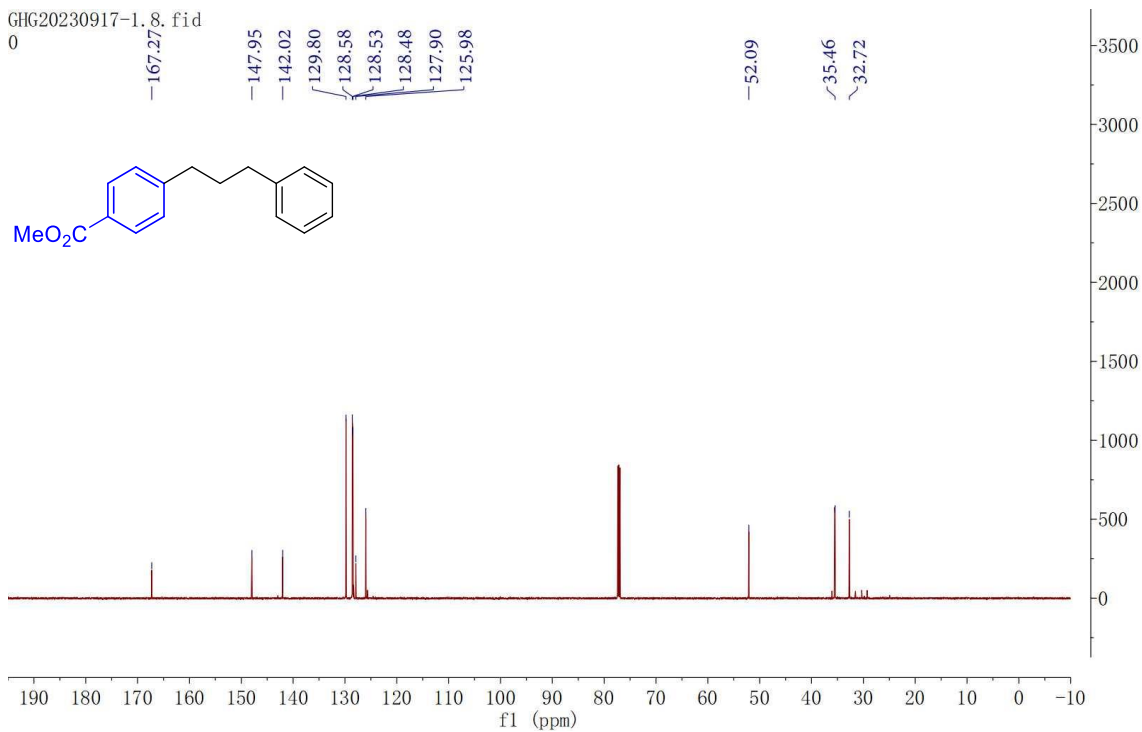

### 1b, <sup>1</sup>H-NMR (600 MHz, CDCl<sub>3</sub>)

GHG20230314.13.fid  
SW1

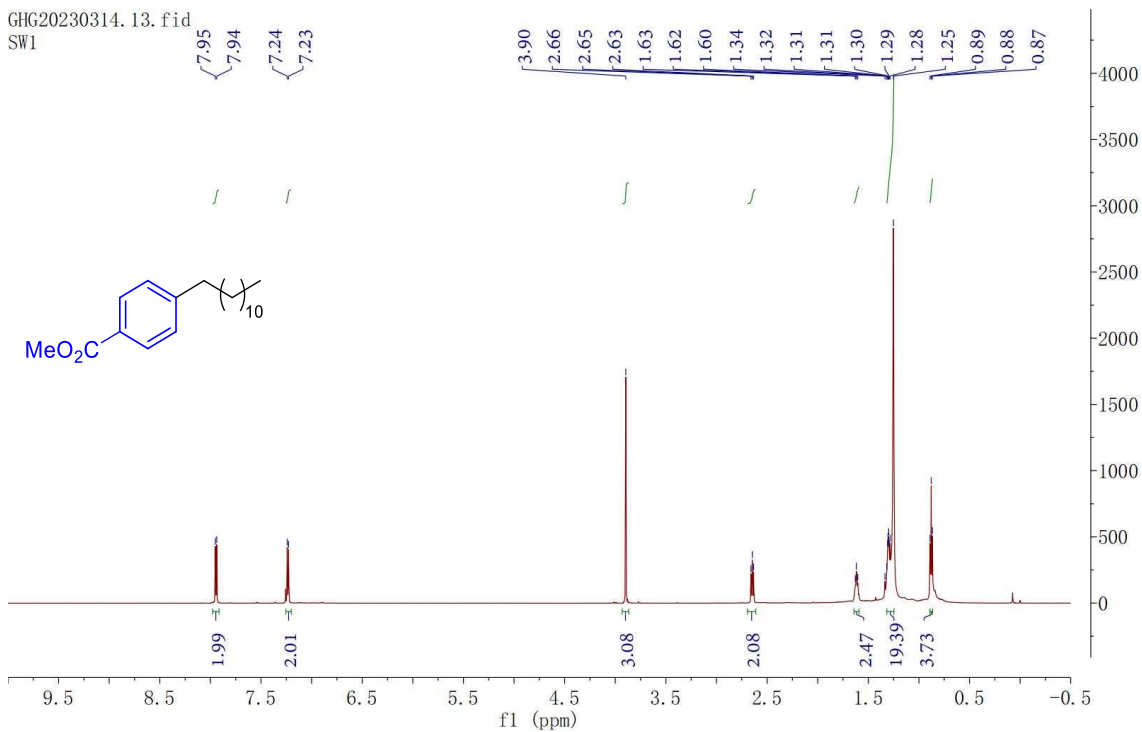

### 1b, <sup>13</sup>C NMR (151 MHz, CDCl<sub>3</sub>)

GHG20231119.10.fid  
42

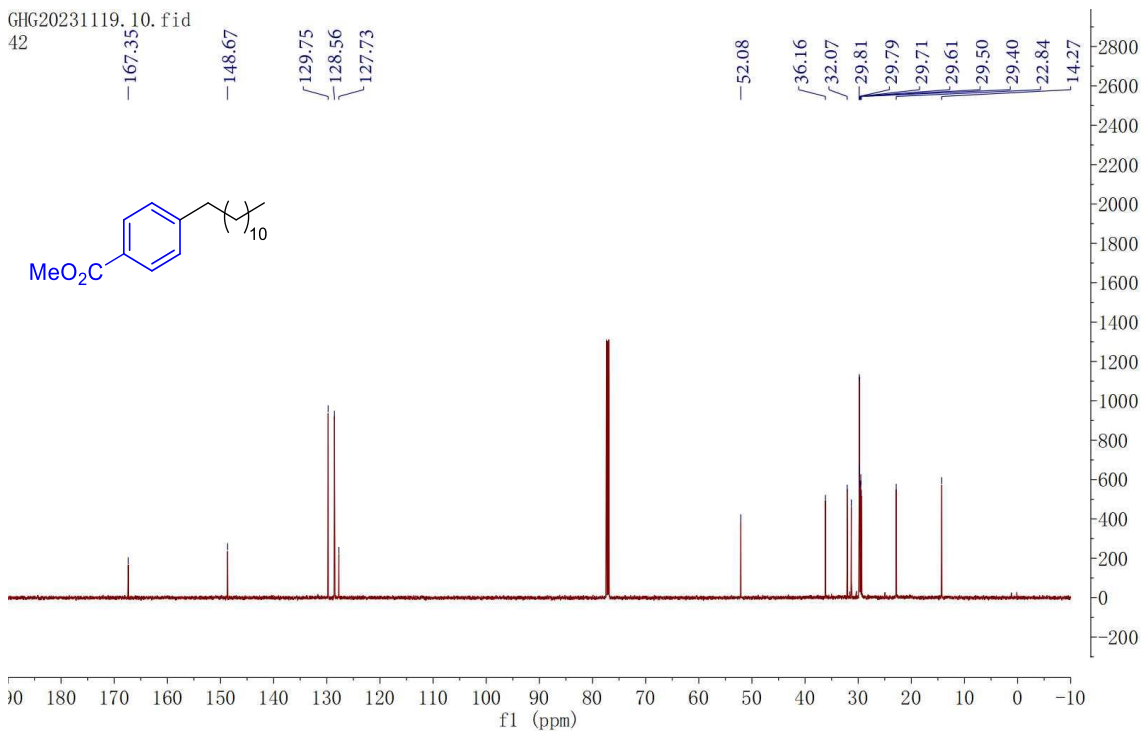

### 2, <sup>1</sup>H-NMR (600 MHz, CDCl<sub>3</sub>)

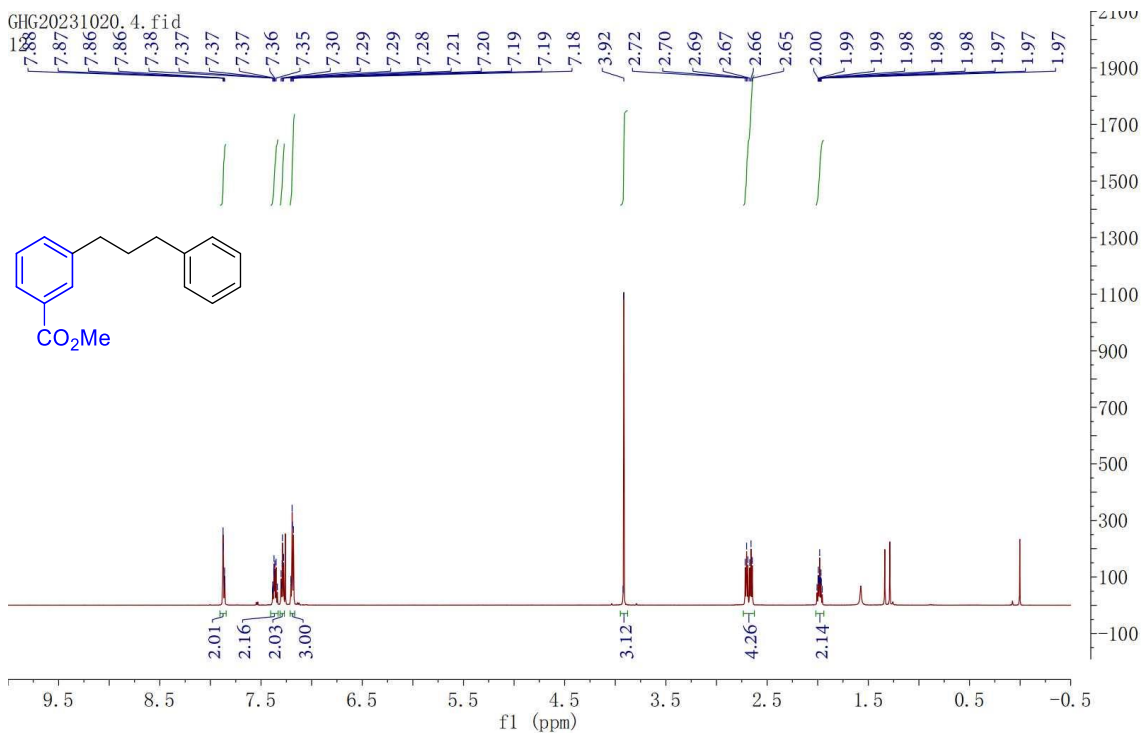

### 3, <sup>1</sup>H-NMR (600 MHz, CDCl<sub>3</sub>)

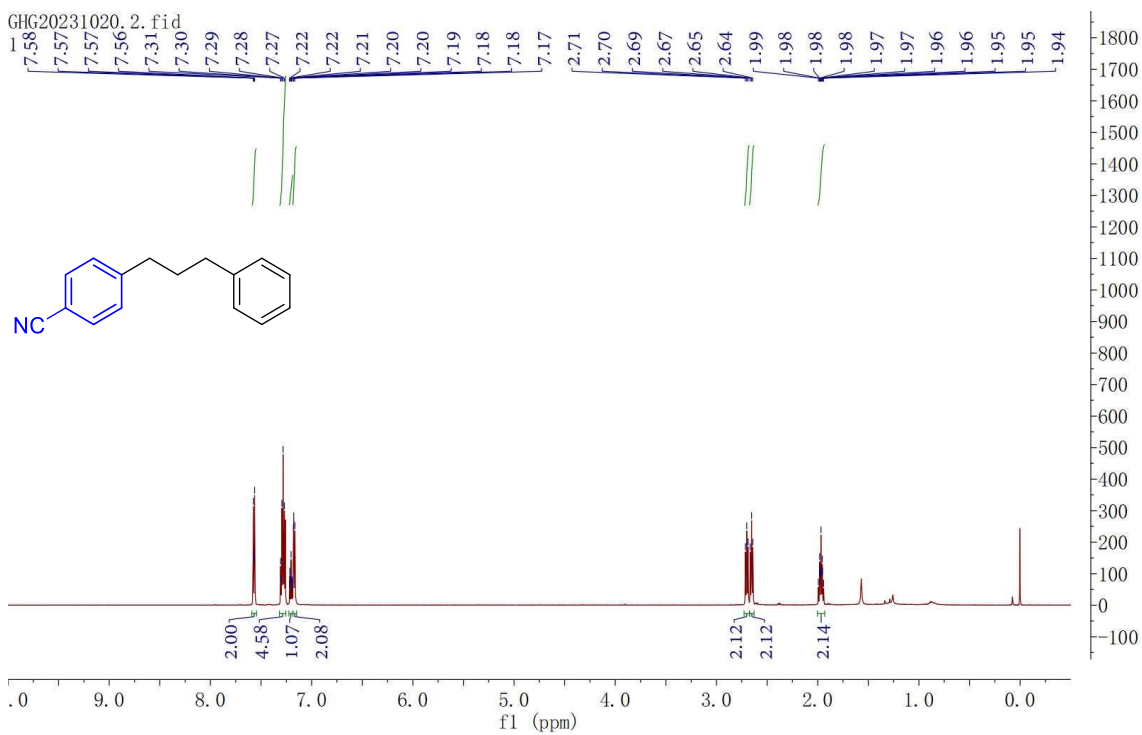



### 3, <sup>13</sup>C NMR (151 MHz, CDCl<sub>3</sub>)

GHG20230917-1. 9. fid  
1

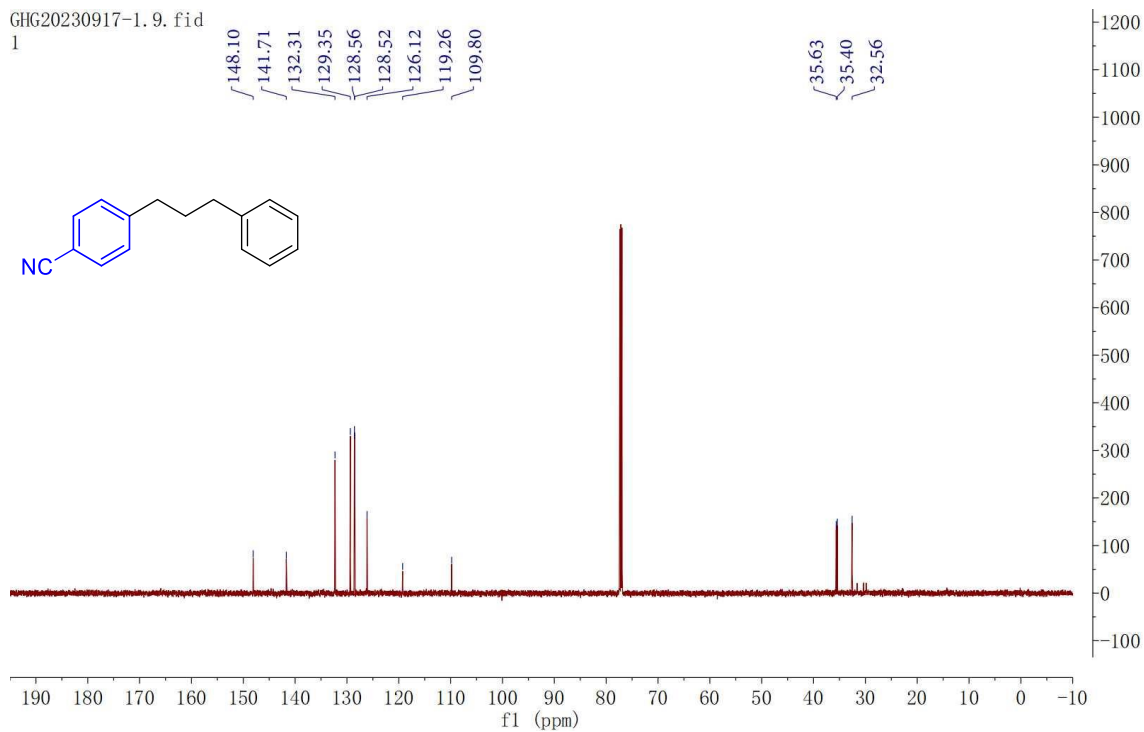

### 4, <sup>1</sup>H-NMR (600 MHz, CDCl<sub>3</sub>)

GHG20230311. 3. fid  
B29

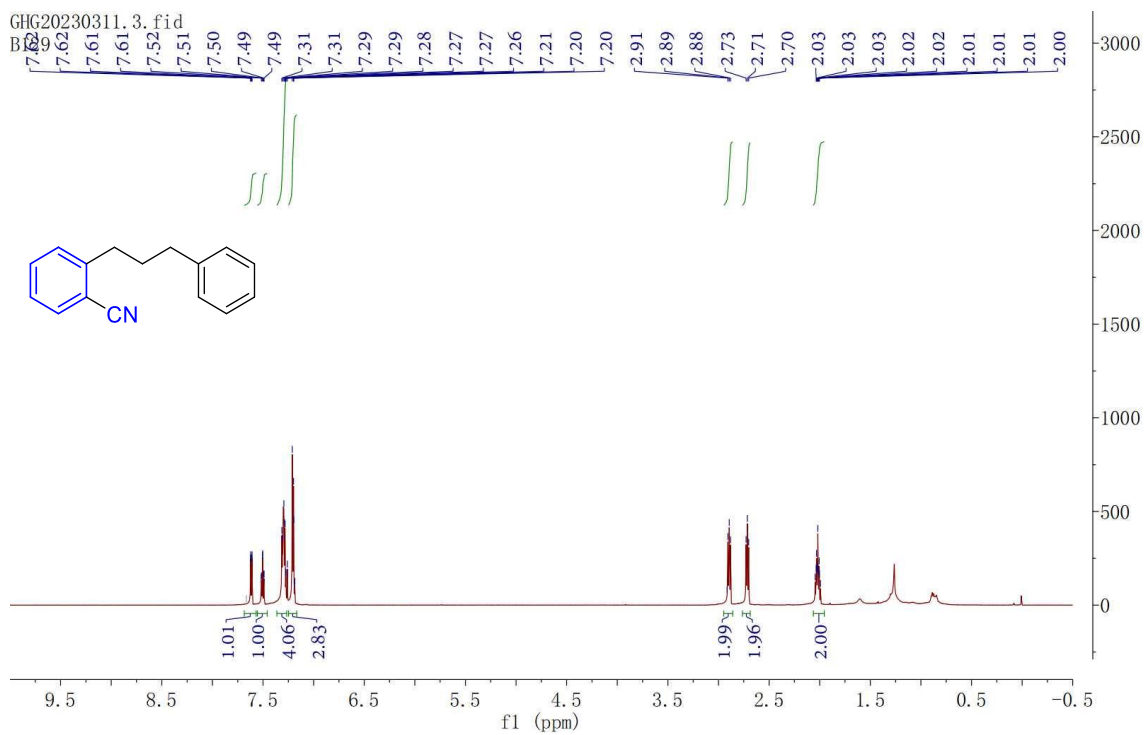

#### 4, <sup>13</sup>C NMR (151 MHz, CDCl<sub>3</sub>)

SDL20230920.16.fid  
129

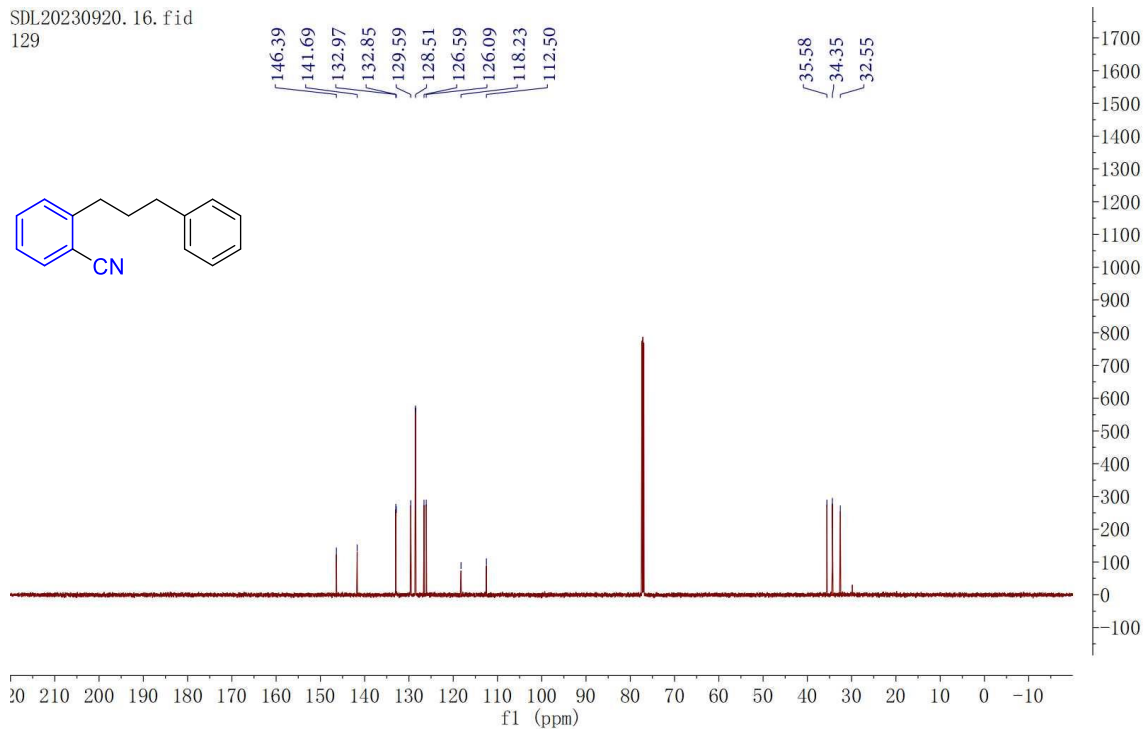

#### 5, <sup>1</sup>H-NMR (600 MHz, CDCl<sub>3</sub>)

CHG20230313.1.fid  
B124

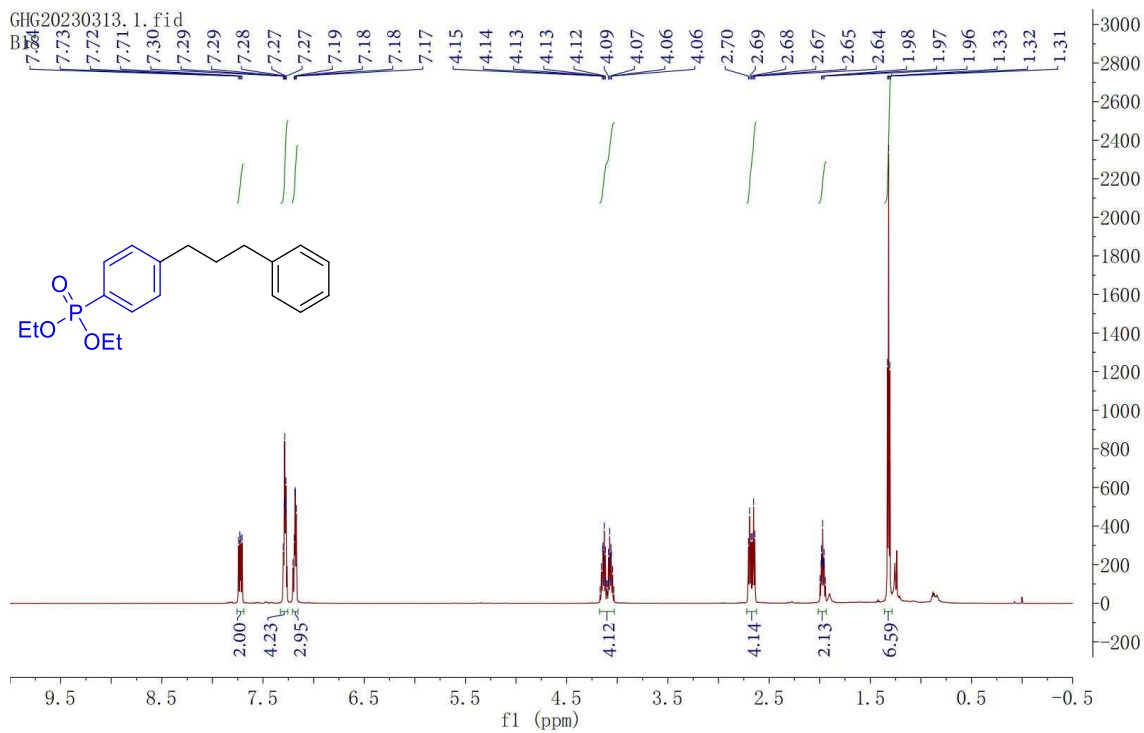

### 5, <sup>13</sup>C NMR (151 MHz, CDCl<sub>3</sub>)

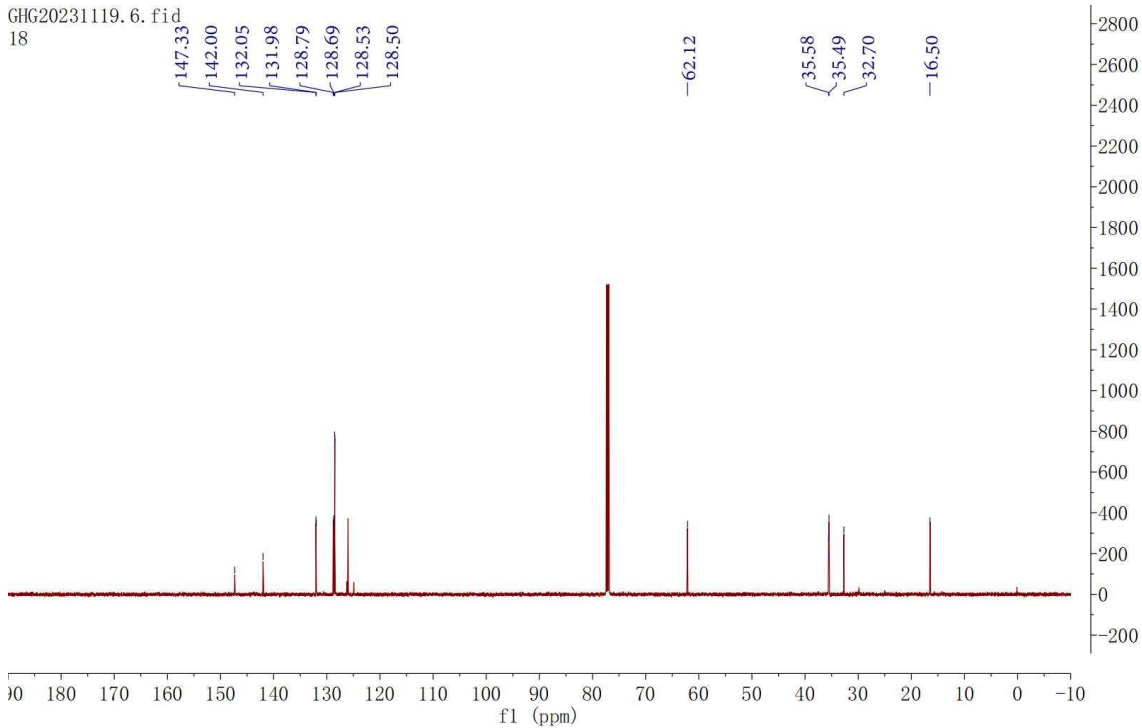

### 6, <sup>1</sup>H-NMR (600 MHz, CDCl<sub>3</sub>)

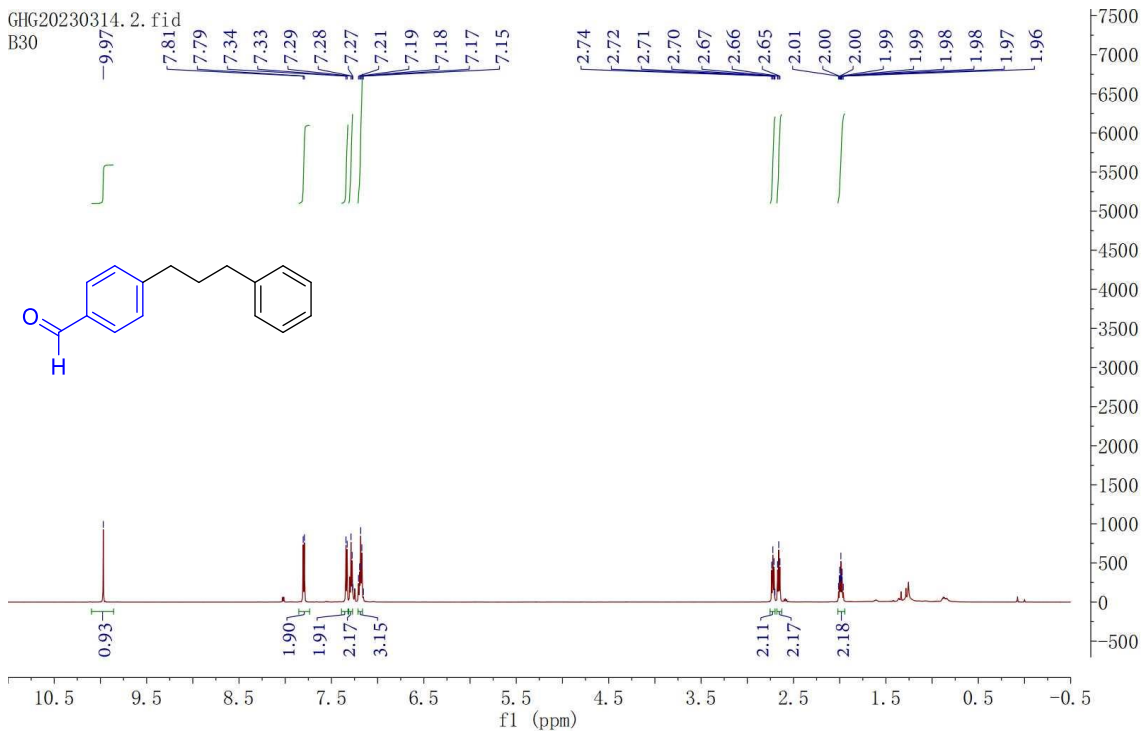

7, <sup>1</sup>H-NMR (600 MHz, CDCl<sub>3</sub>)

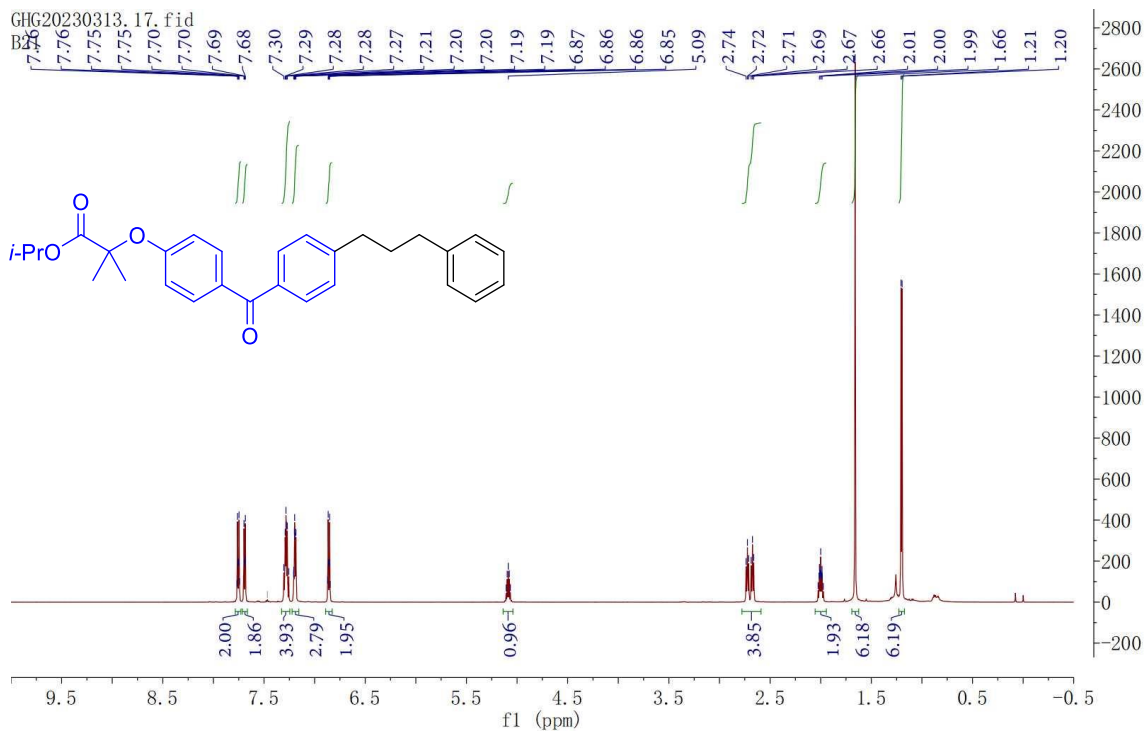

7, <sup>13</sup>C NMR (151 MHz, CDCl<sub>3</sub>)

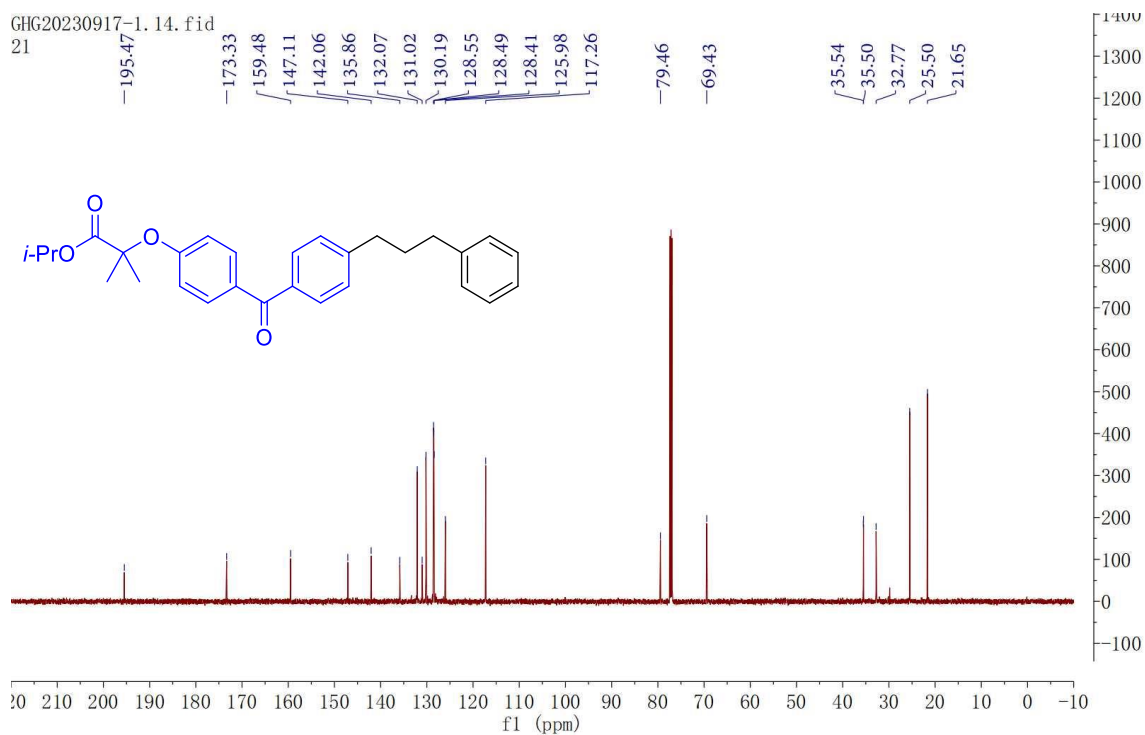

### 8, <sup>1</sup>H-NMR (600 MHZ, CDCl<sub>3</sub>)

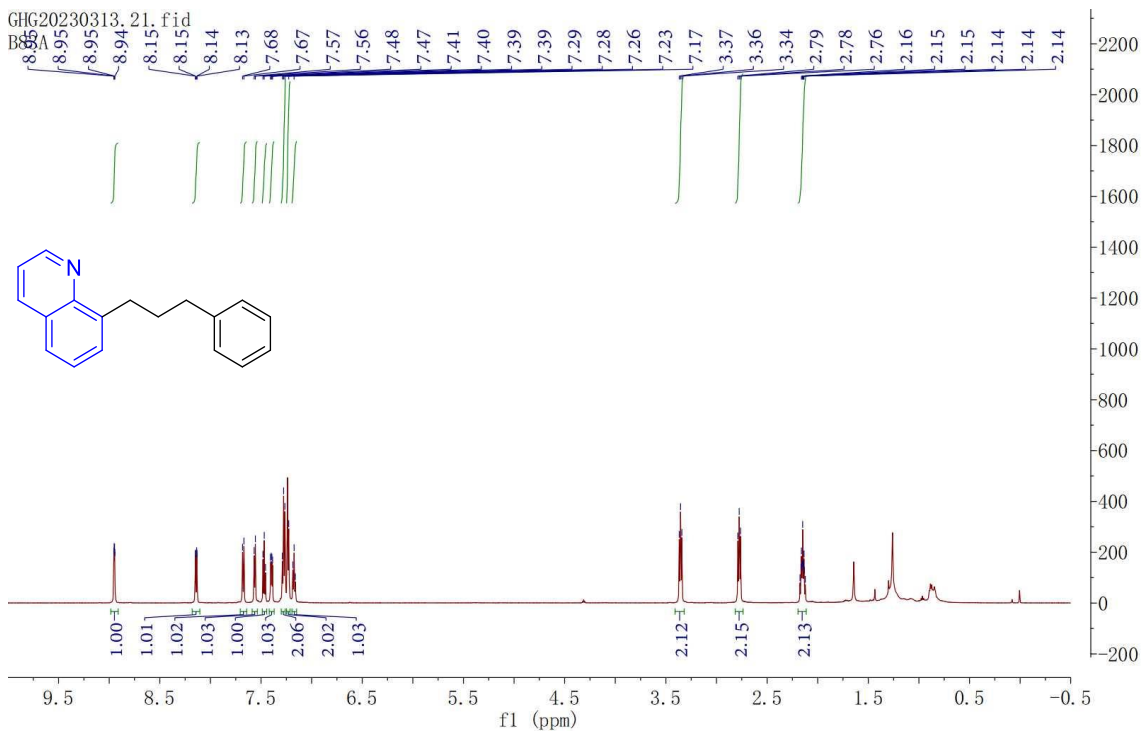

### 9, <sup>1</sup>H-NMR (600 MHZ, CDCl<sub>3</sub>)

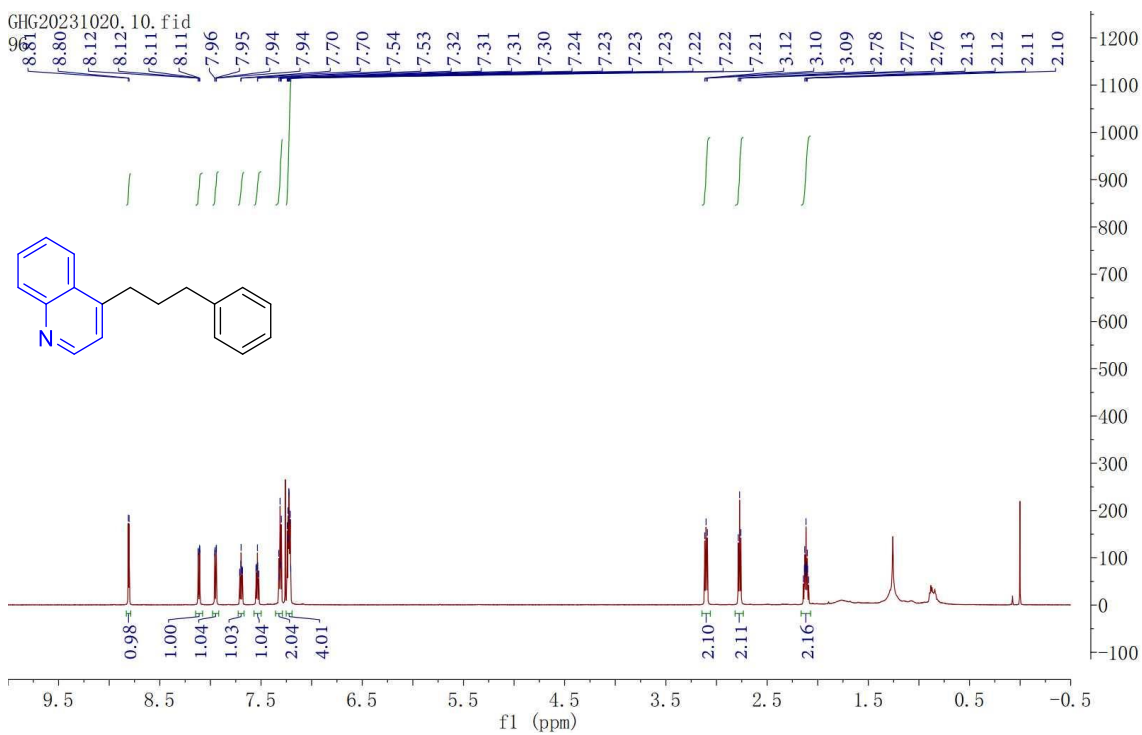

### 9, <sup>13</sup>C NMR (151 MHz, CDCl<sub>3</sub>)

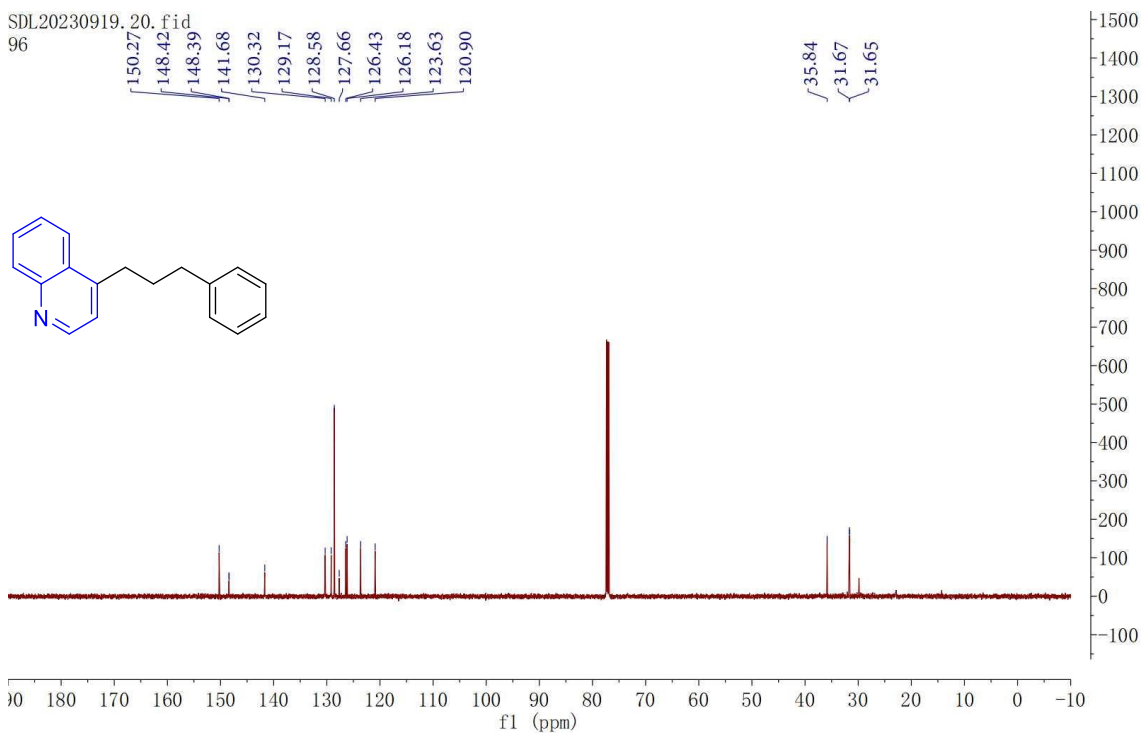

### 10, <sup>1</sup>H-NMR (600 MHz, CDCl<sub>3</sub>)

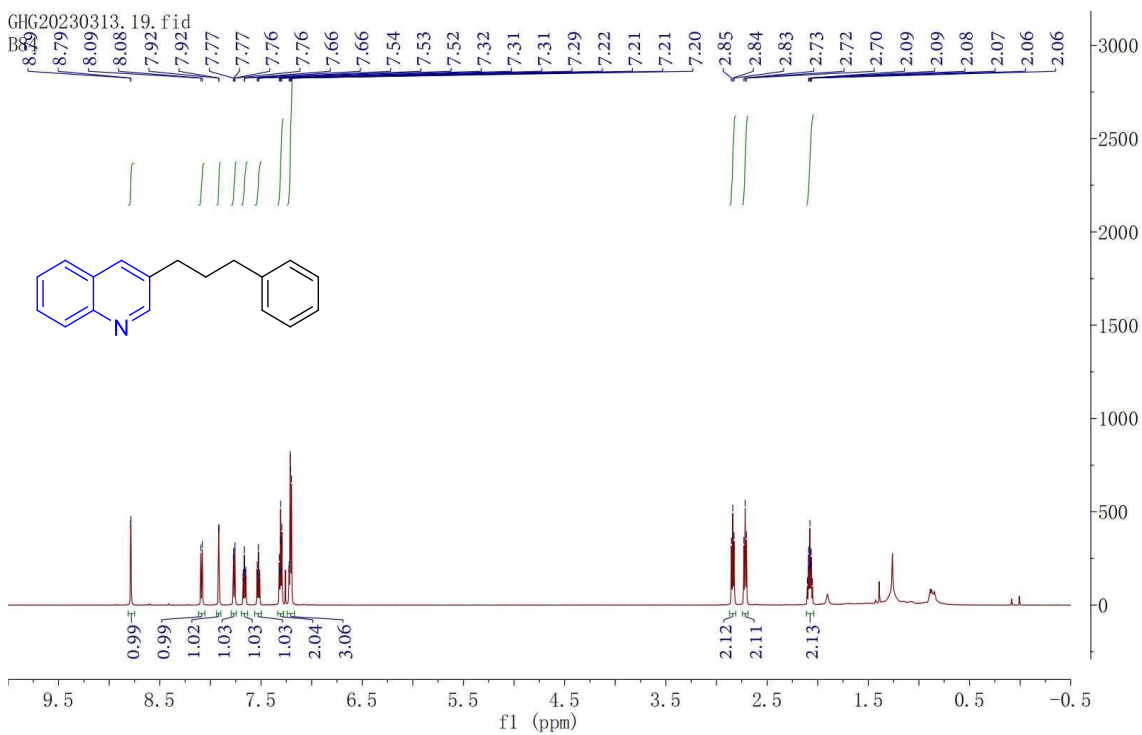

### 10, <sup>13</sup>C NMR (151 MHz, CDCl<sub>3</sub>)

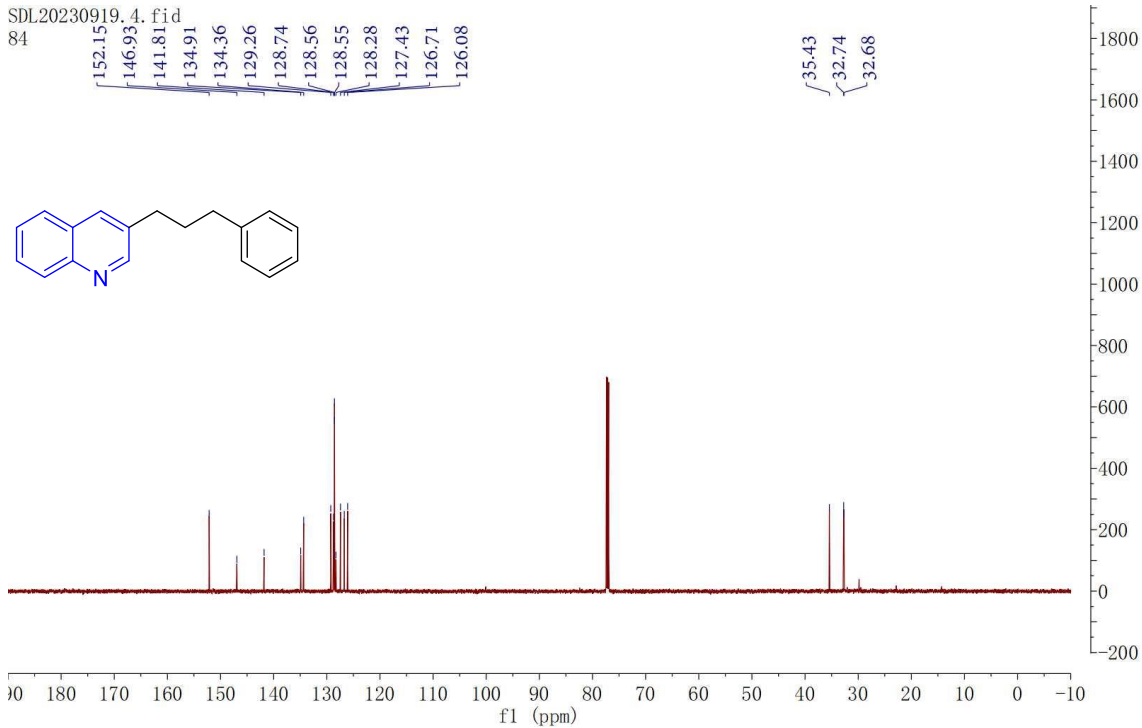

### 11, <sup>1</sup>H-NMR (600 MHz, CDCl<sub>3</sub>)

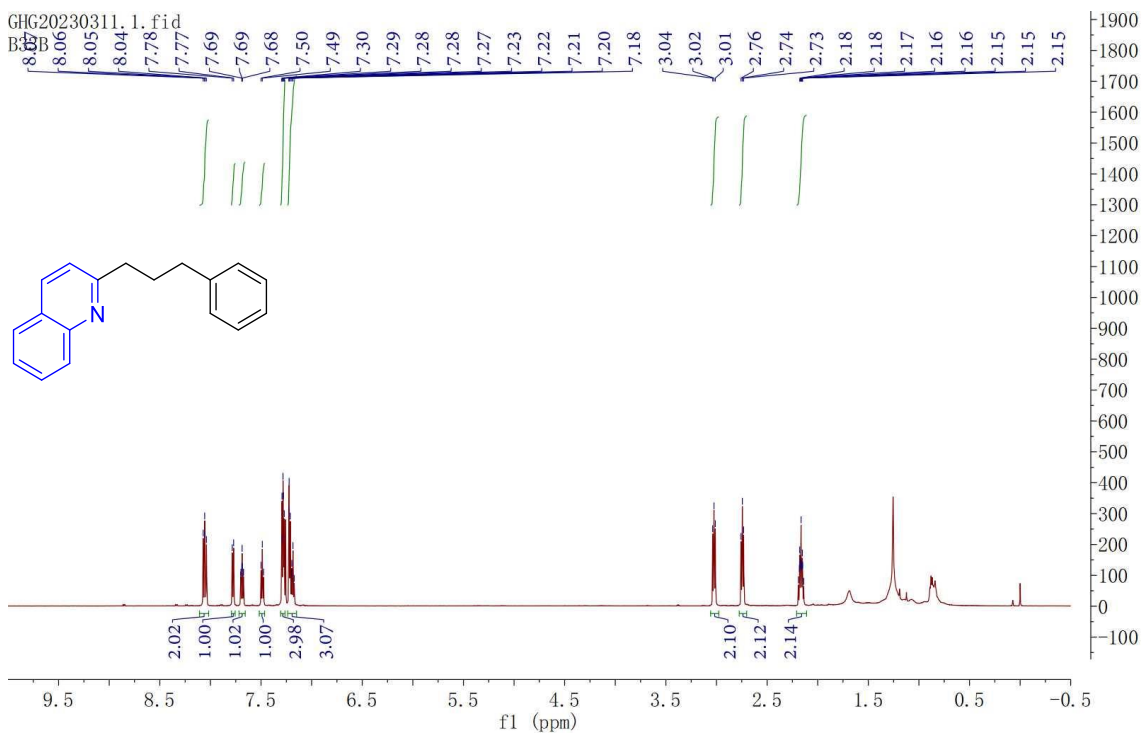

## 12, <sup>1</sup>H-NMR (600 MHz, CDCl<sub>3</sub>)

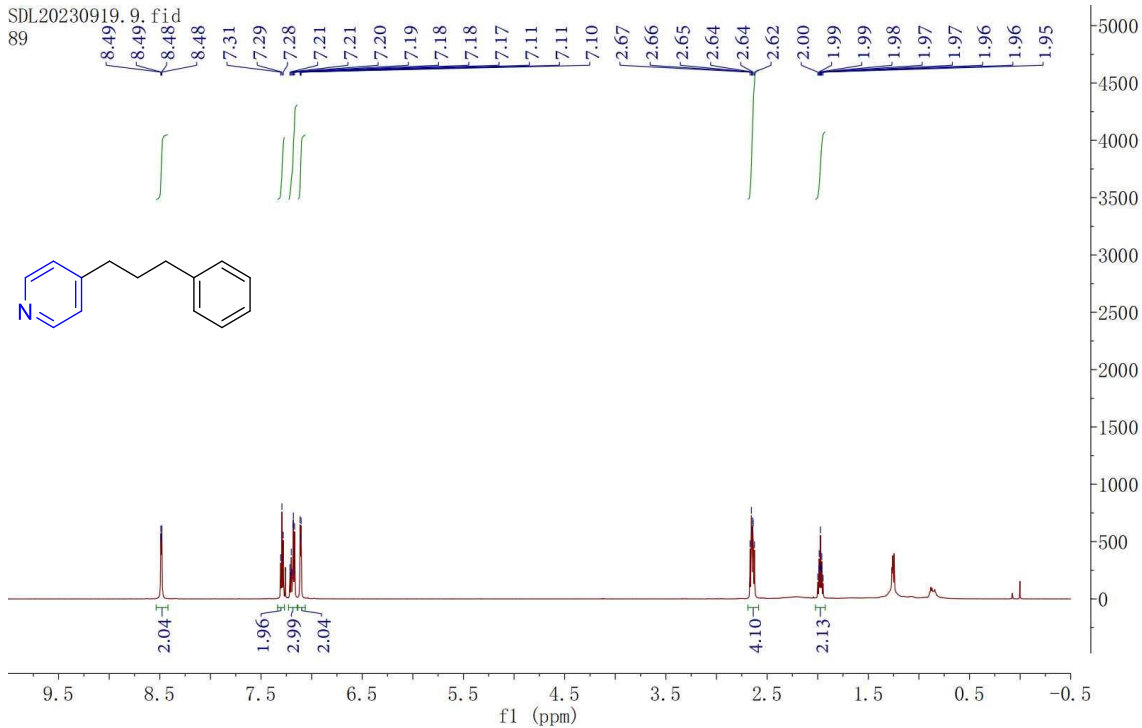

## 12, <sup>13</sup>C NMR (151 MHz, CDCl<sub>3</sub>)

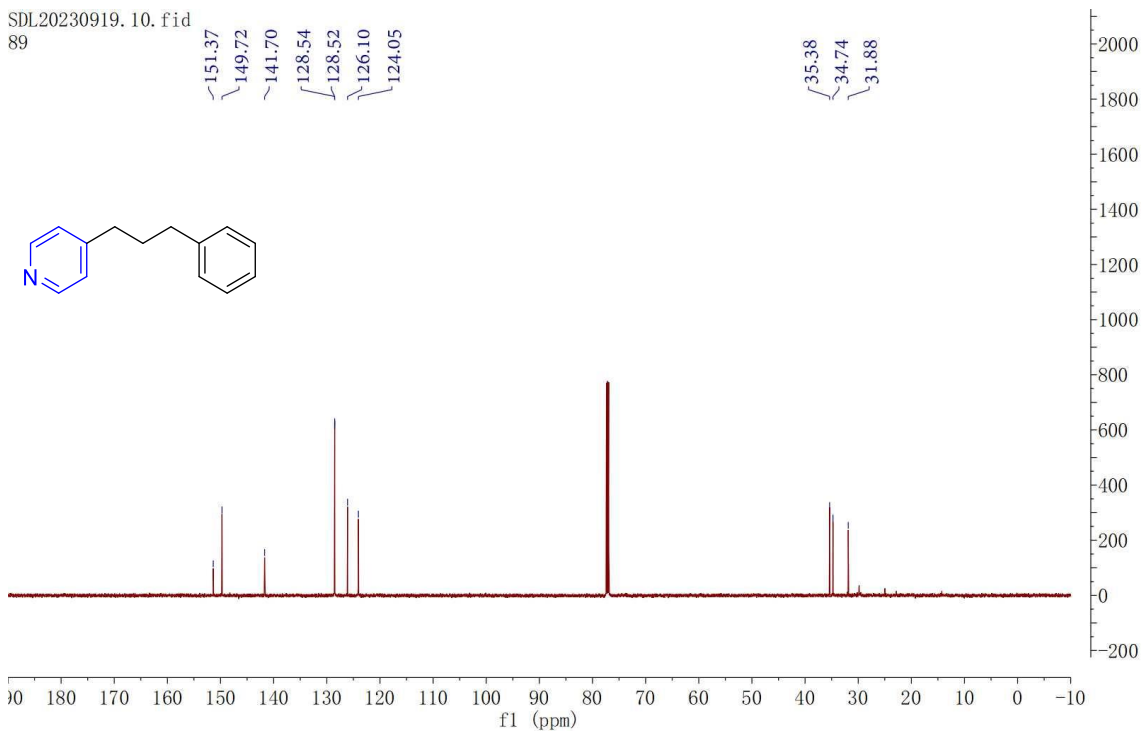



**13, <sup>1</sup>H-NMR (600 MHz, CDCl<sub>3</sub>)**

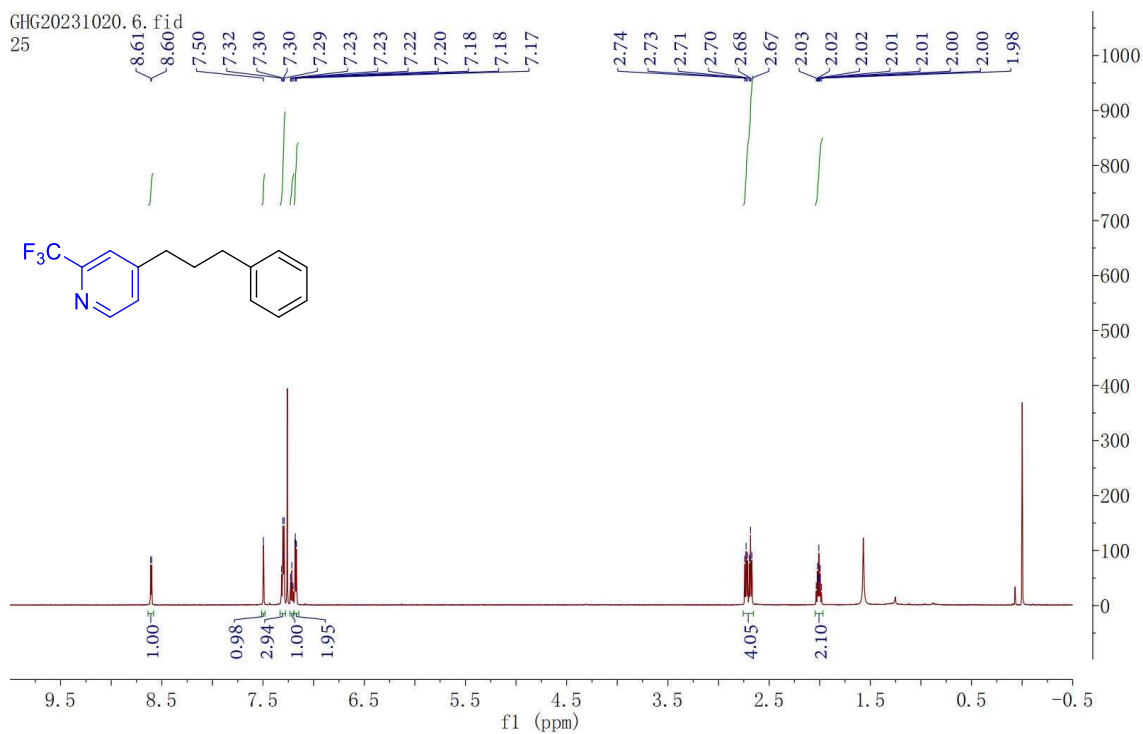

**13, <sup>13</sup>C NMR (151 MHz, CDCl<sub>3</sub>)**

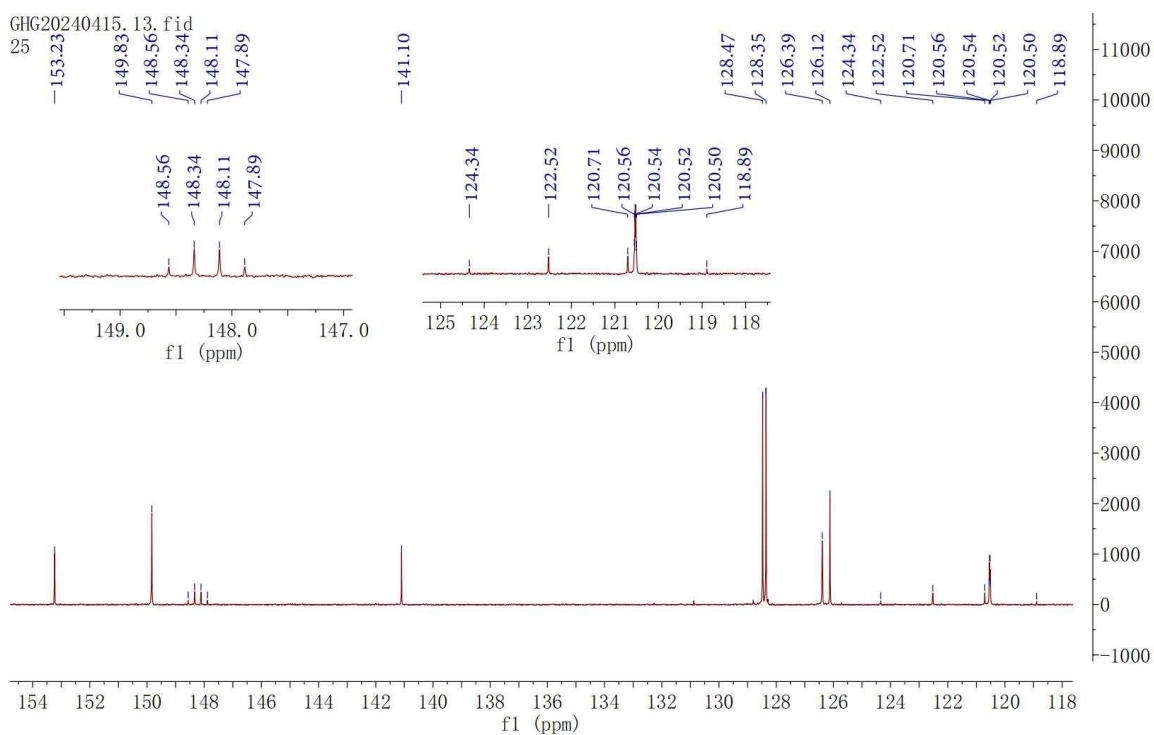

### 14, <sup>1</sup>H-NMR (600 MHz, CDCl<sub>3</sub>)

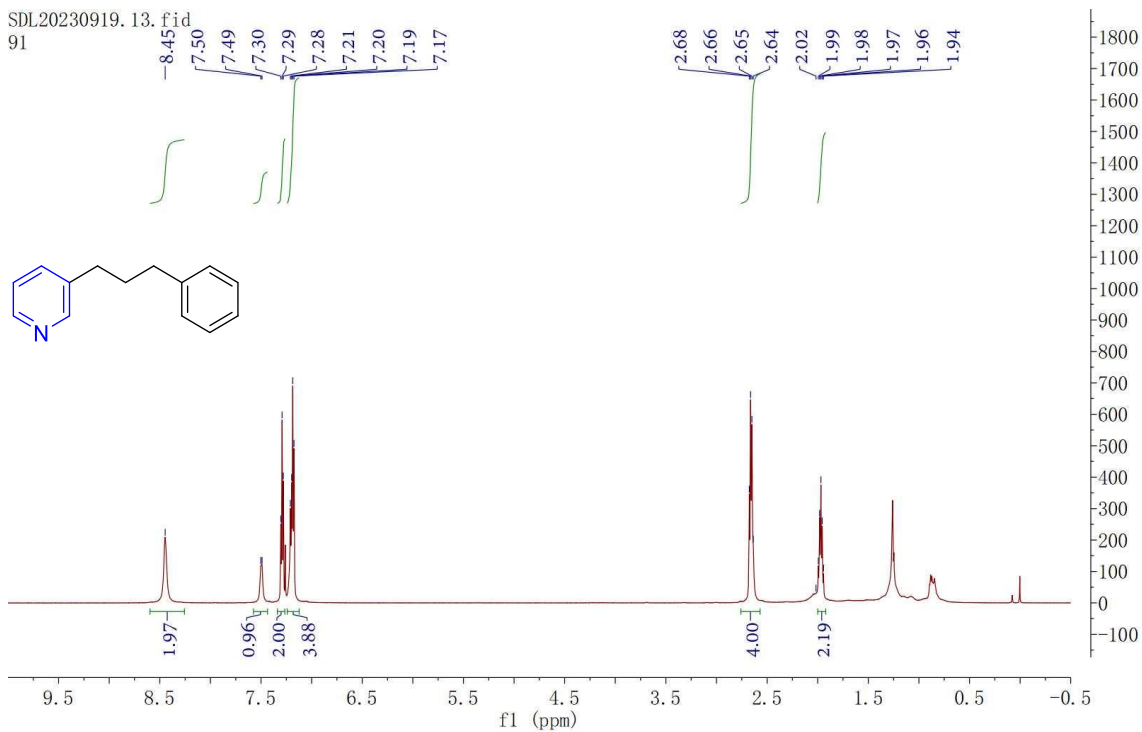

### 14, <sup>13</sup>C NMR (151 MHz, CDCl<sub>3</sub>)

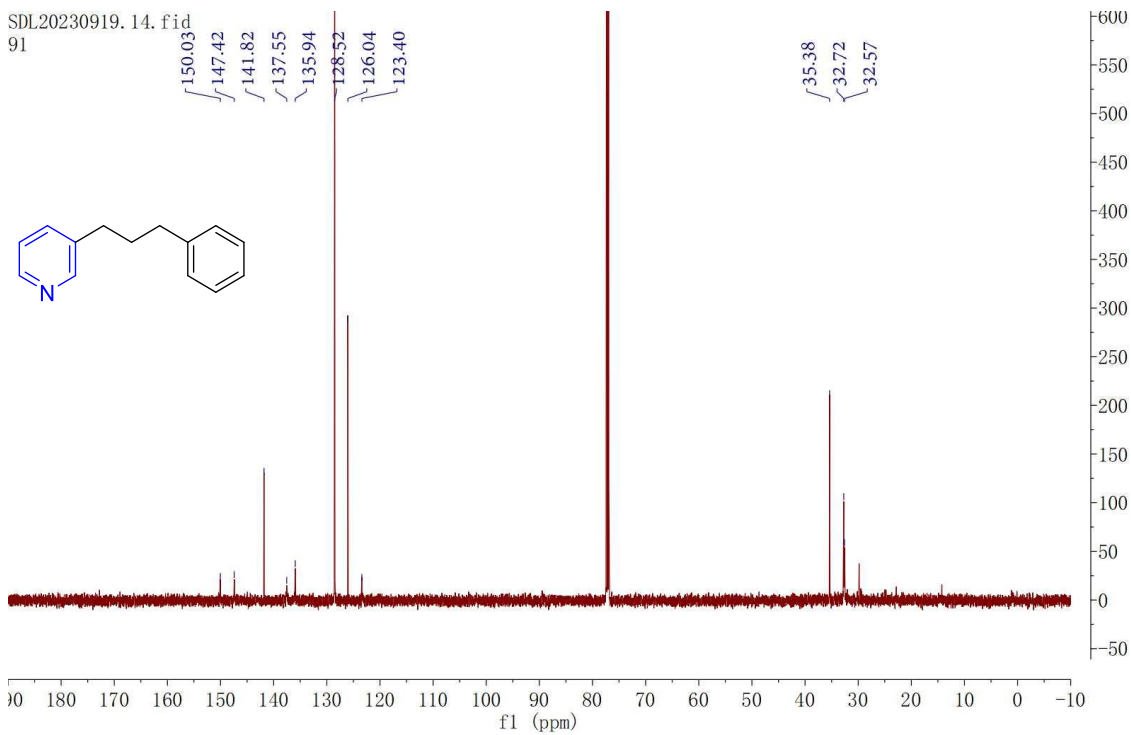

### 15, <sup>1</sup>H-NMR (600 MHz, CDCl<sub>3</sub>)

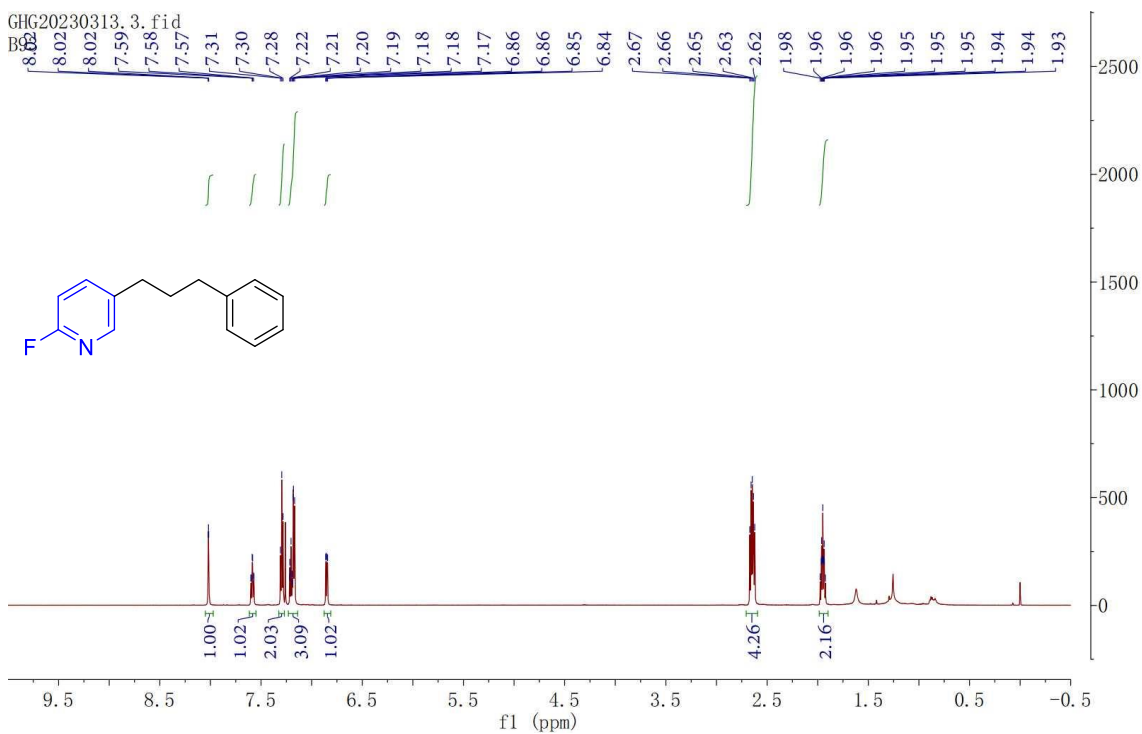

### 16, <sup>1</sup>H-NMR (600 MHz, CDCl<sub>3</sub>)

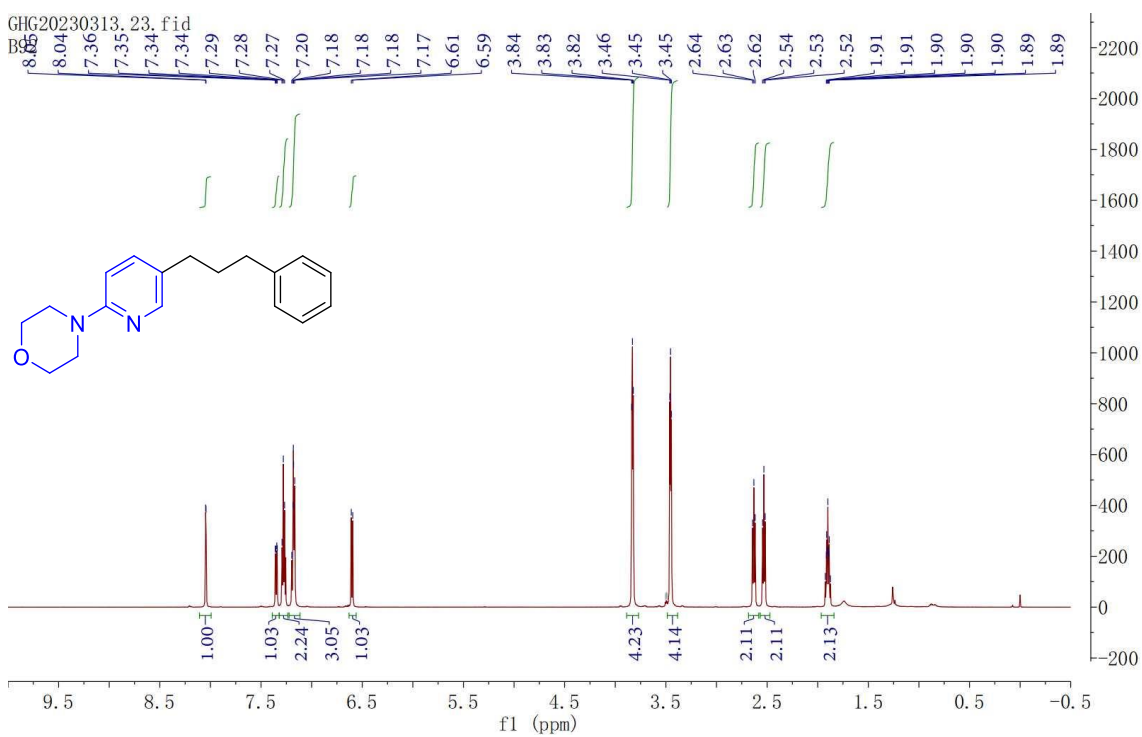

16, <sup>13</sup>C NMR (151 MHz, CDCl<sub>3</sub>)

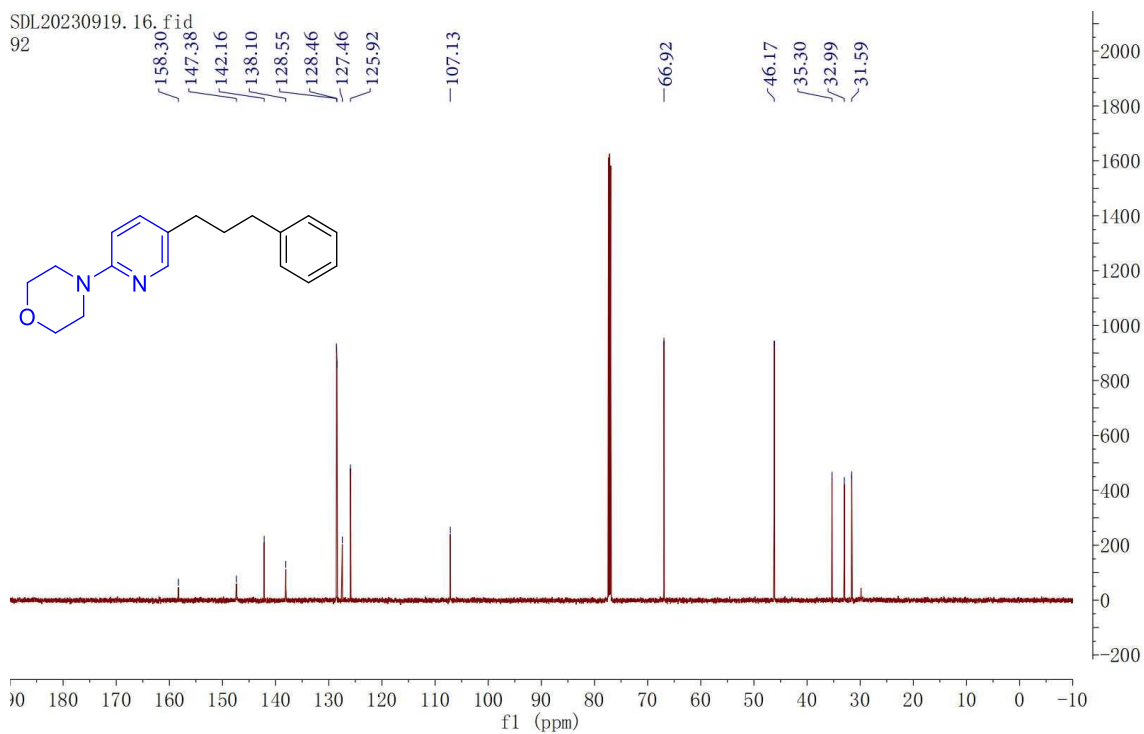

17, <sup>1</sup>H-NMR (600 MHz, CDCl<sub>3</sub>)

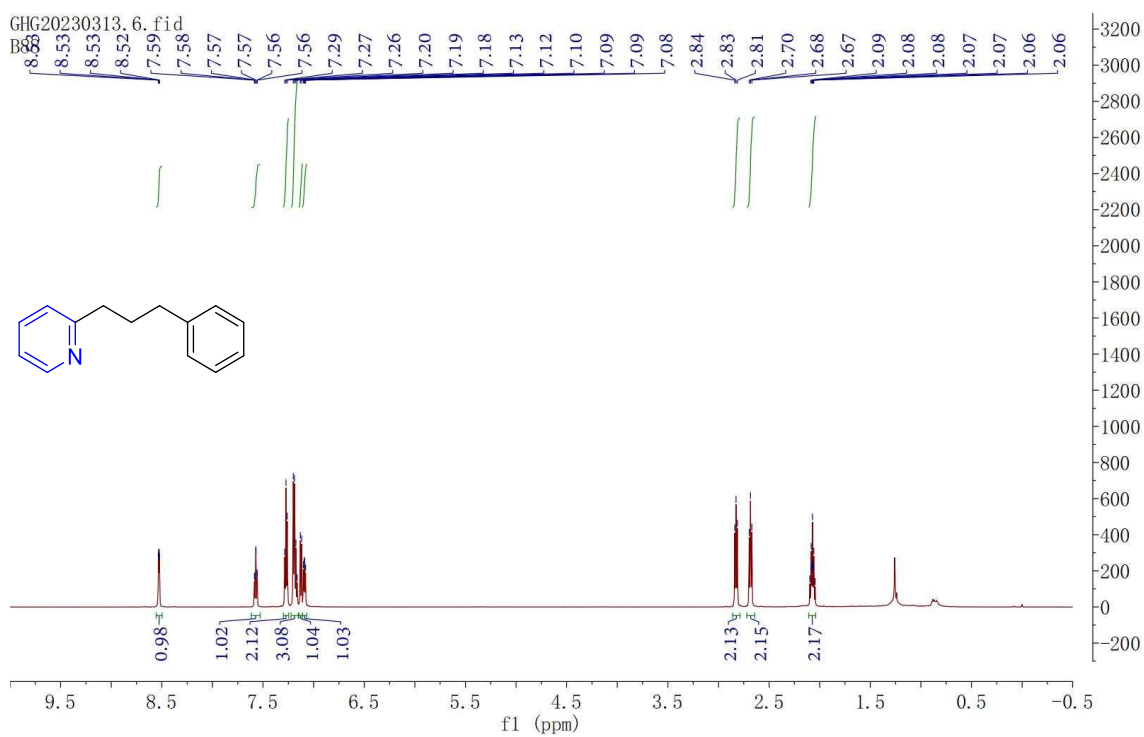

17, <sup>13</sup>C NMR (151 MHz, CDCl<sub>3</sub>)

SDL20230919. 8. fid  
88

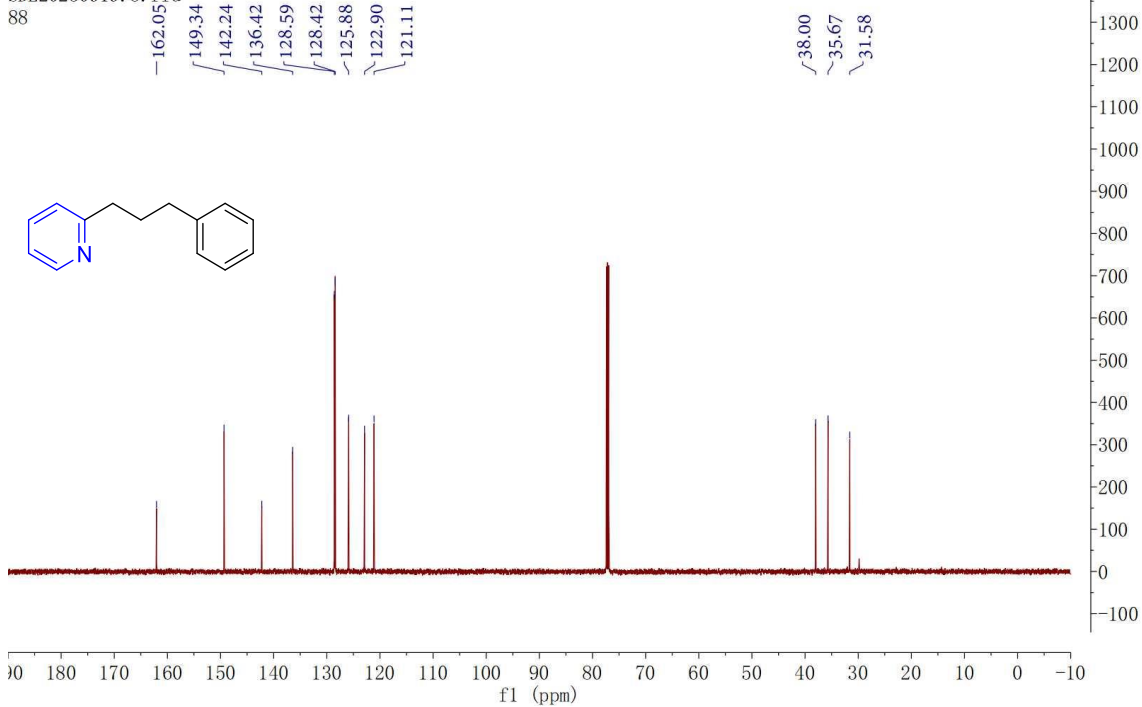

18, <sup>1</sup>H-NMR (600 MHz, CDCl<sub>3</sub>)

CYX20231006. 13. fid  
98

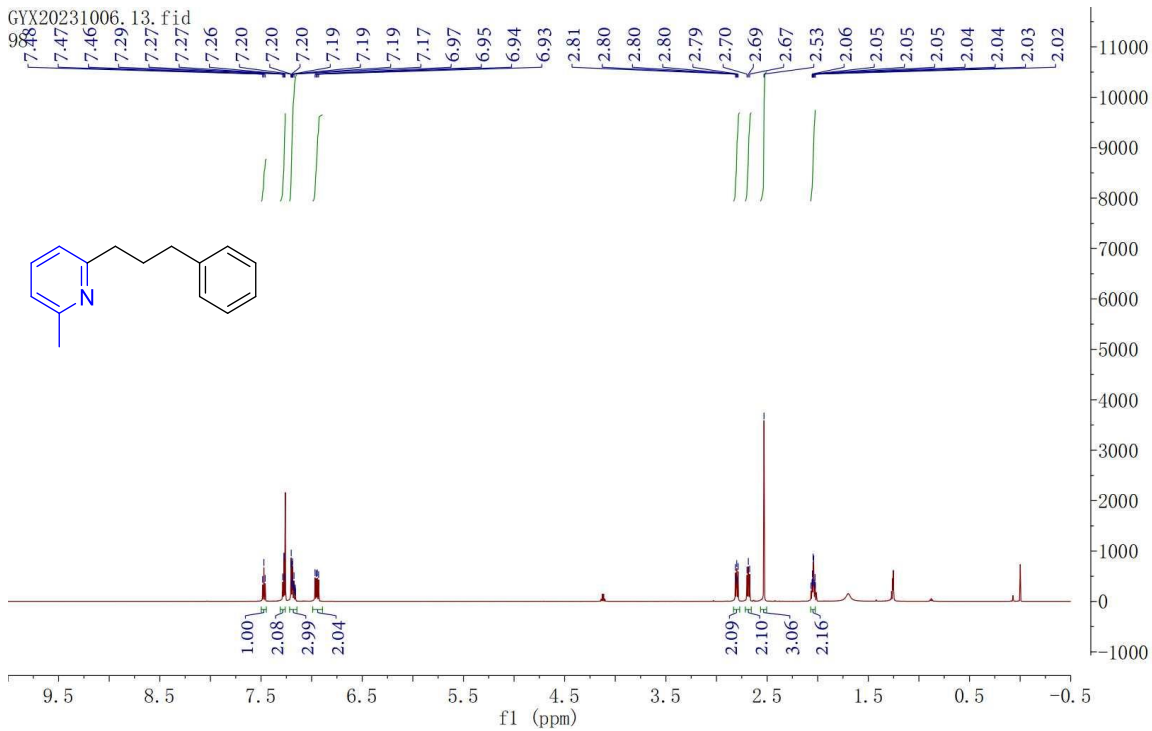

### 18, <sup>13</sup>C NMR (151 MHz, CDCl<sub>3</sub>)

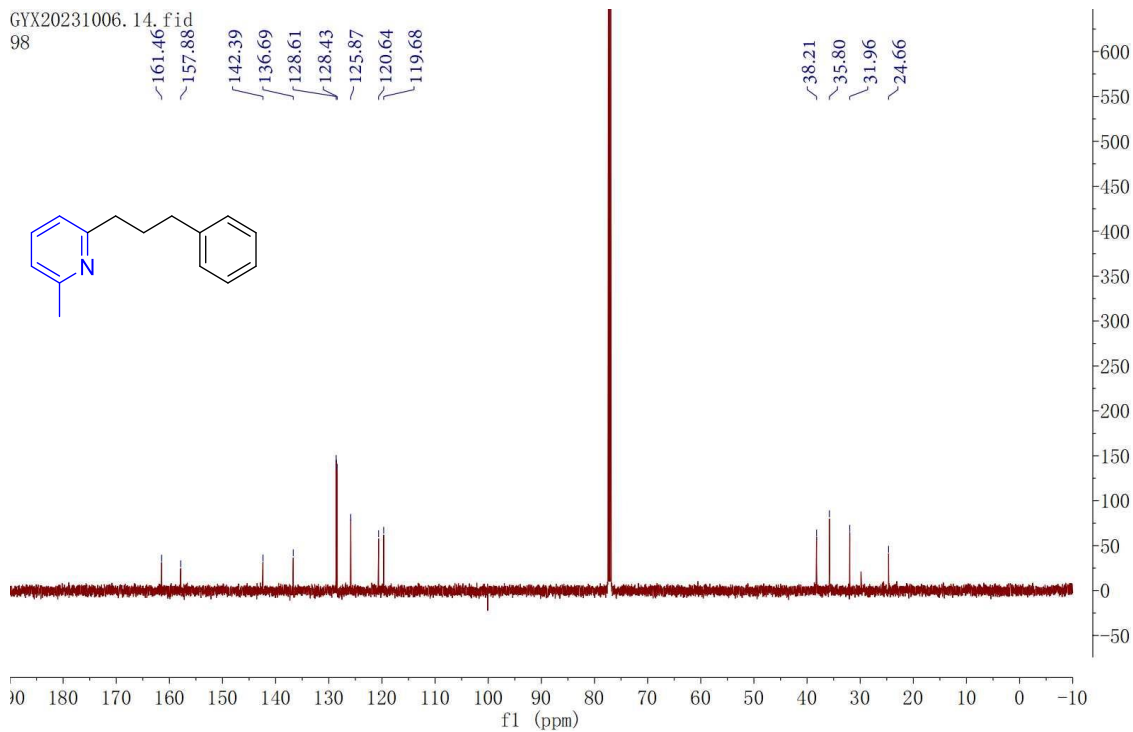

### 19, <sup>1</sup>H-NMR (600 MHz, CDCl<sub>3</sub>)

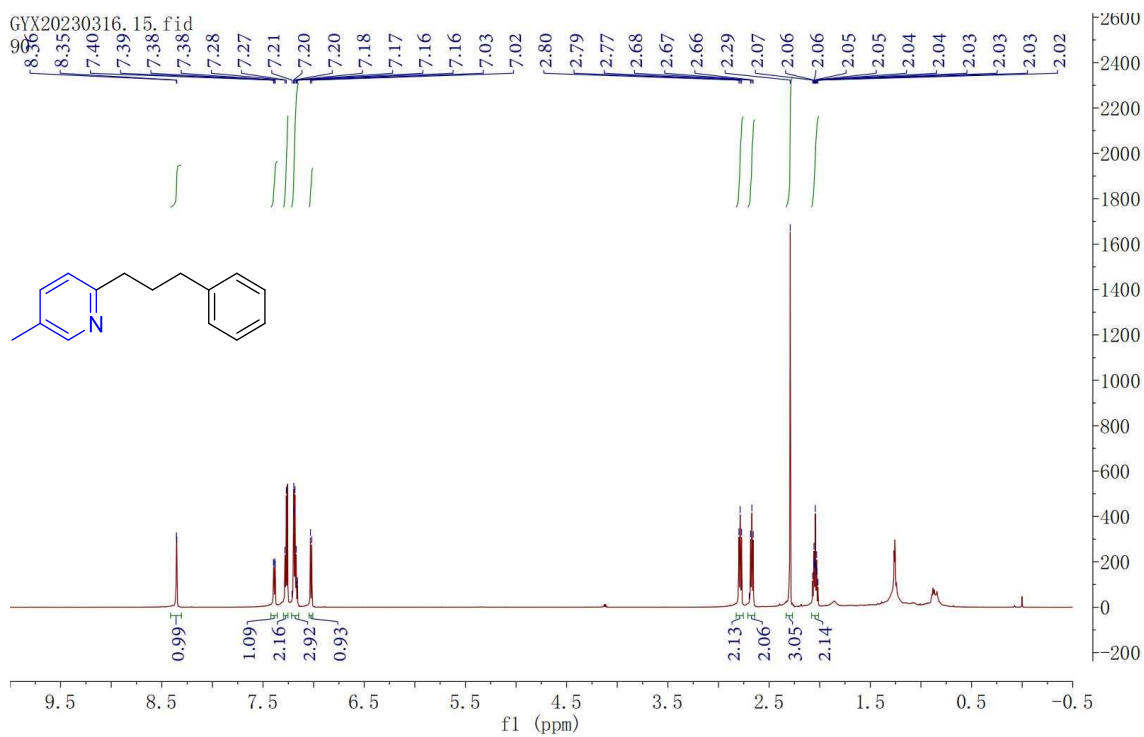

19, <sup>13</sup>C NMR (151 MHz, CDCl<sub>3</sub>)

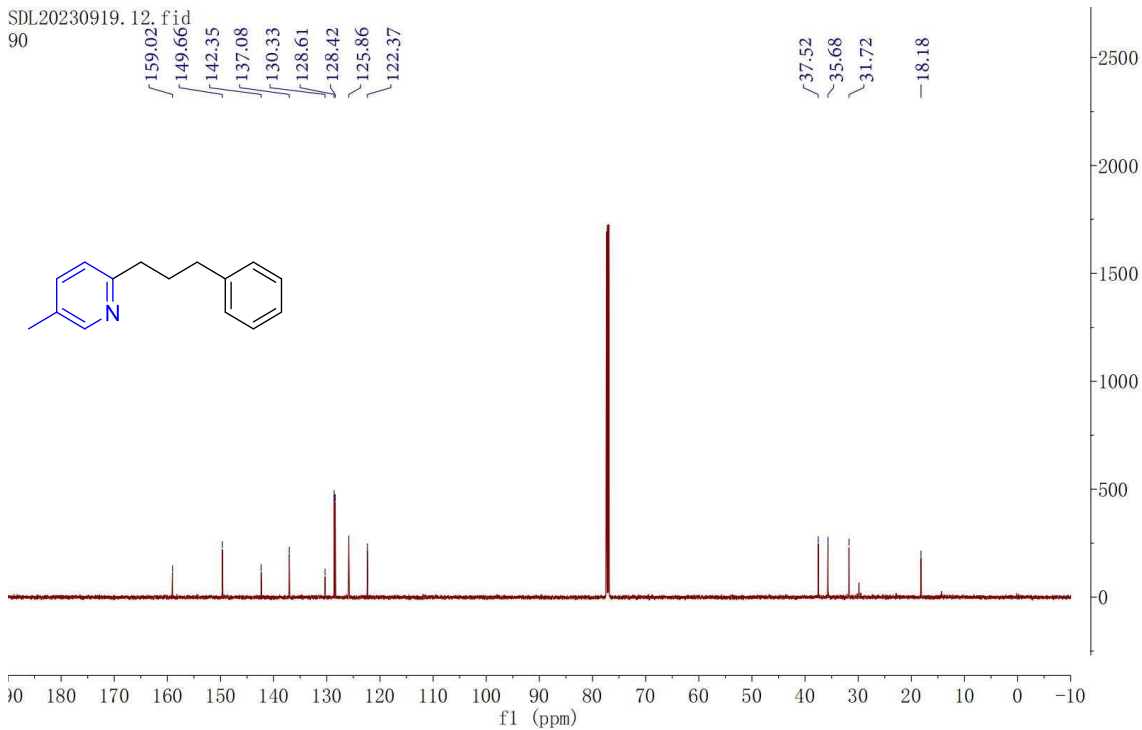

20, <sup>1</sup>H-NMR (600 MHz, CDCl<sub>3</sub>)

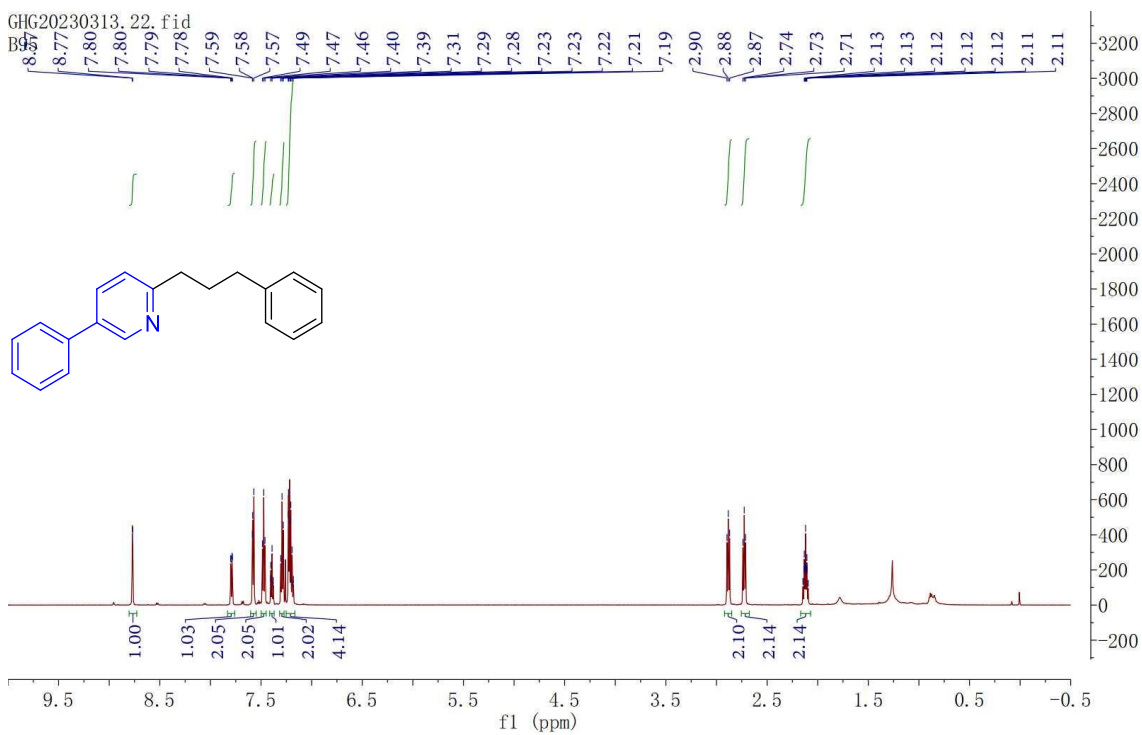

### 20, <sup>13</sup>C NMR (151 MHz, CDCl<sub>3</sub>)

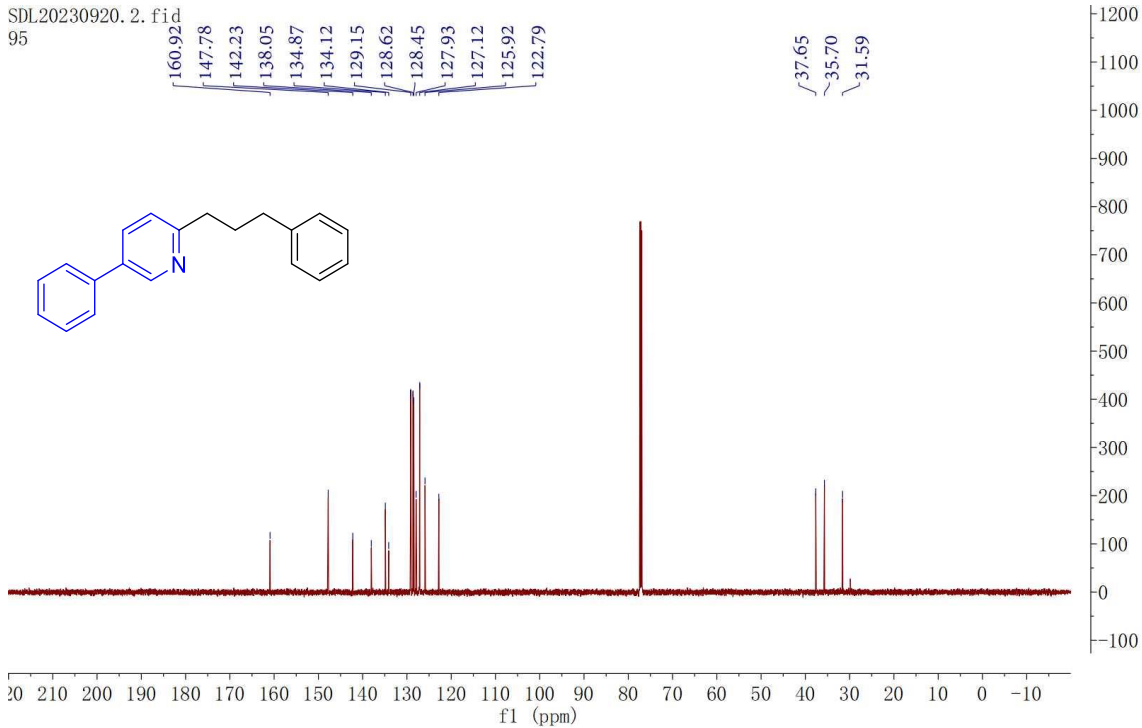

### 21, <sup>1</sup>H-NMR (600 MHz, CDCl<sub>3</sub>)

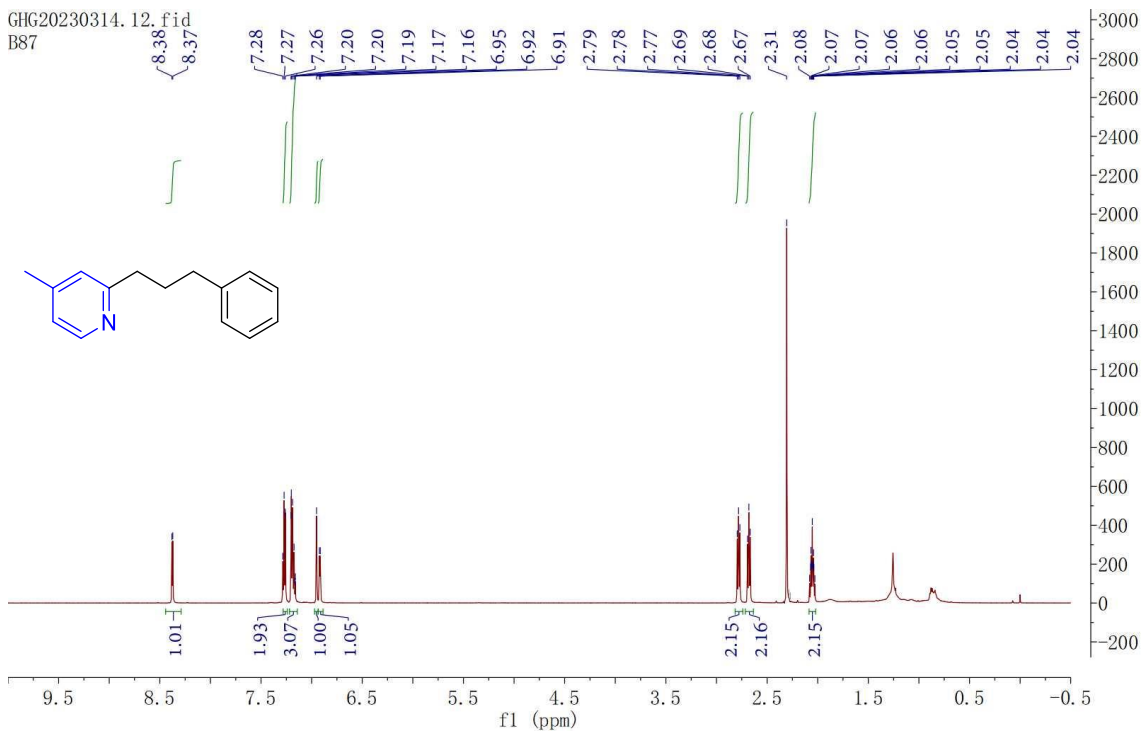



### 21, <sup>13</sup>C NMR (151 MHz, CDCl<sub>3</sub>)

SDL20230919.6.fid  
87

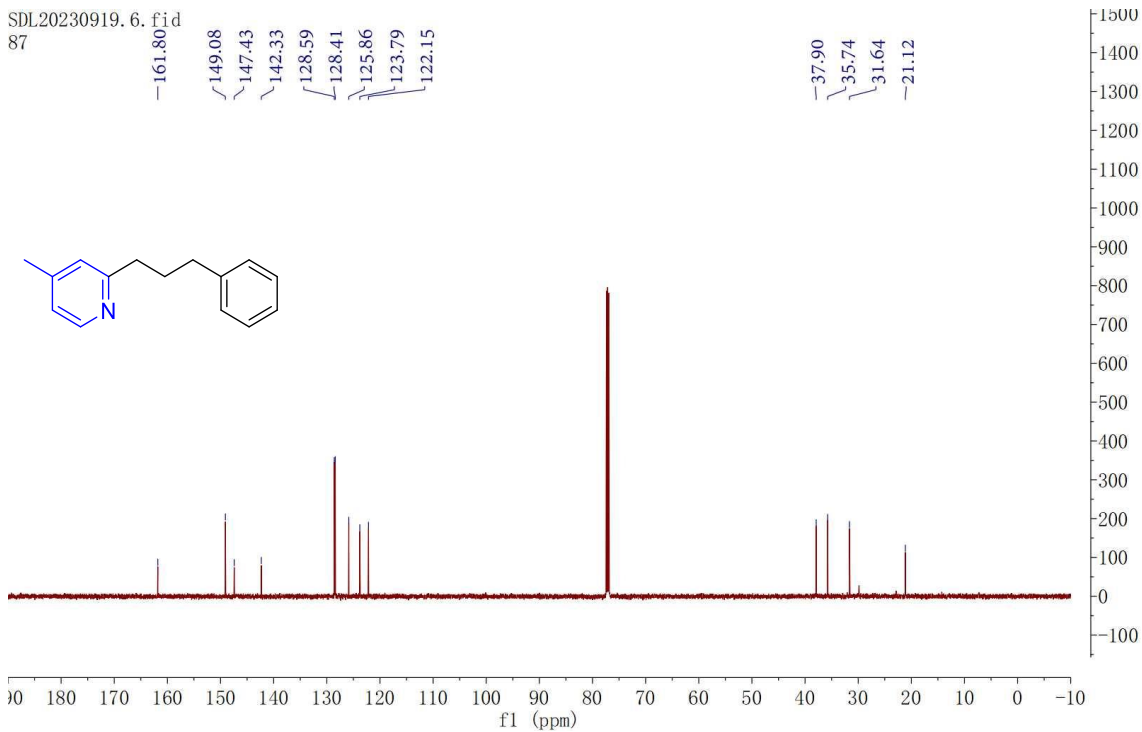

### 22, <sup>1</sup>H-NMR (600 MHz, CDCl<sub>3</sub>)

CHG20231020.8.fid  
368

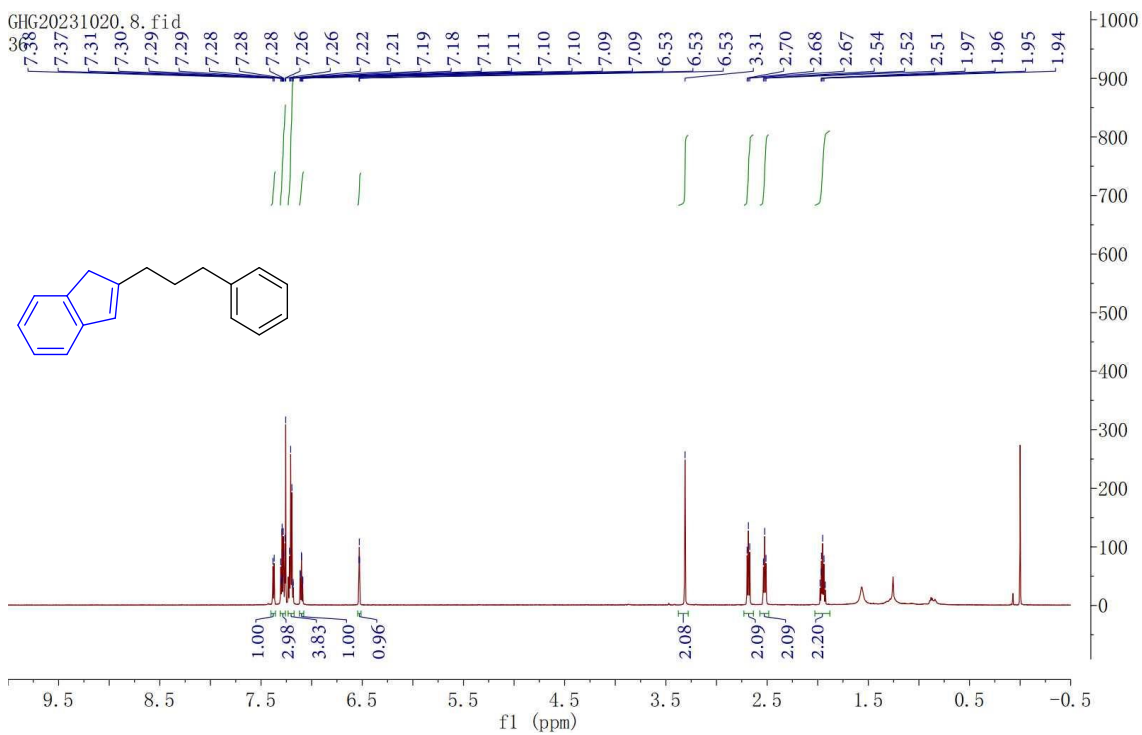

23, <sup>1</sup>H-NMR (600 MHz, CDCl<sub>3</sub>)

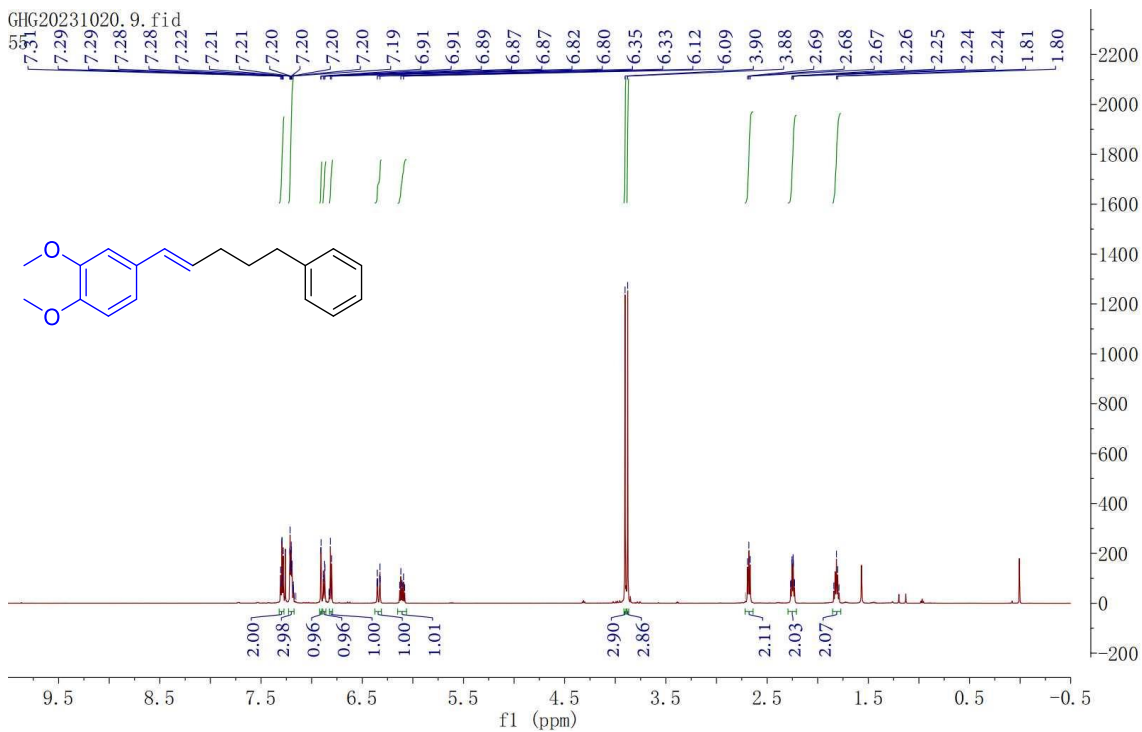

23, <sup>13</sup>C NMR (151 MHz, CDCl<sub>3</sub>)

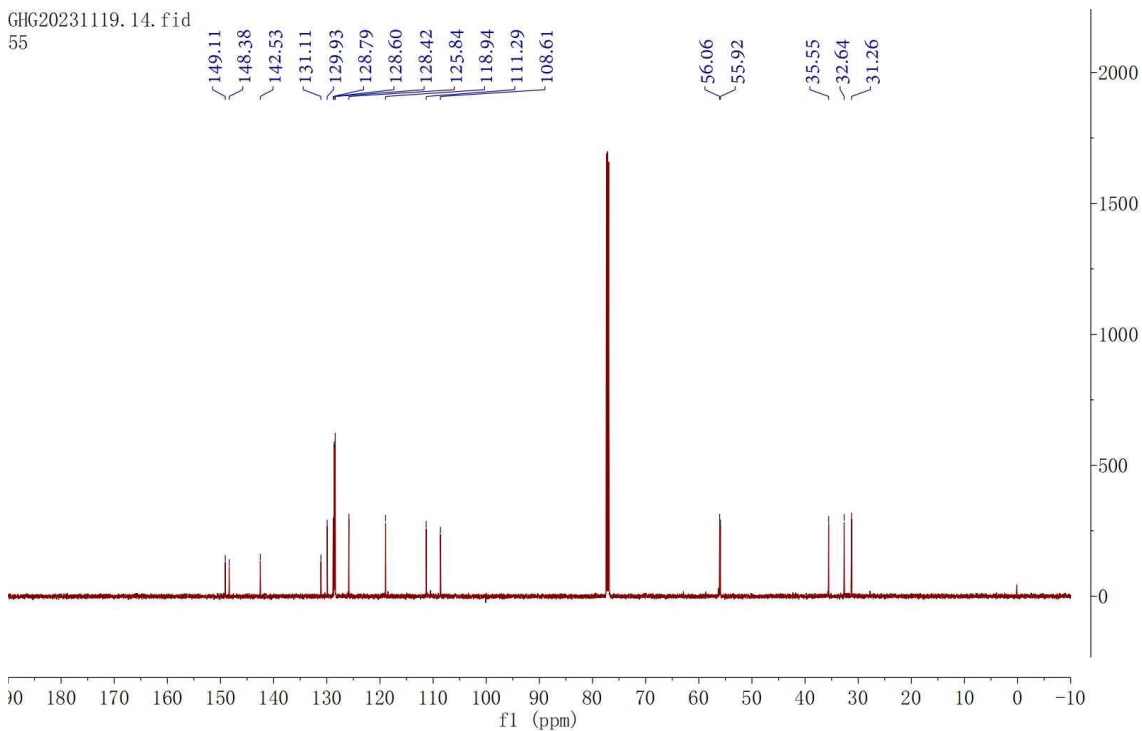

24, <sup>1</sup>H-NMR (600 MHz, CDCl<sub>3</sub>)

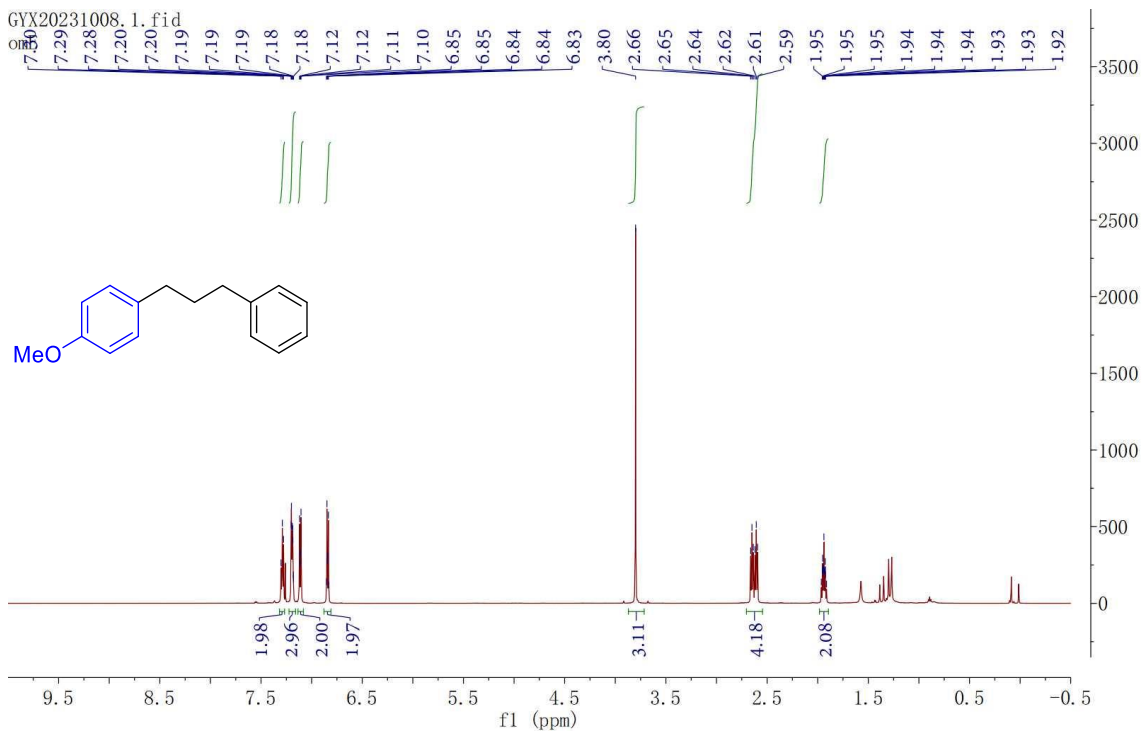

25, <sup>1</sup>H-NMR (600 MHz, CDCl<sub>3</sub>)

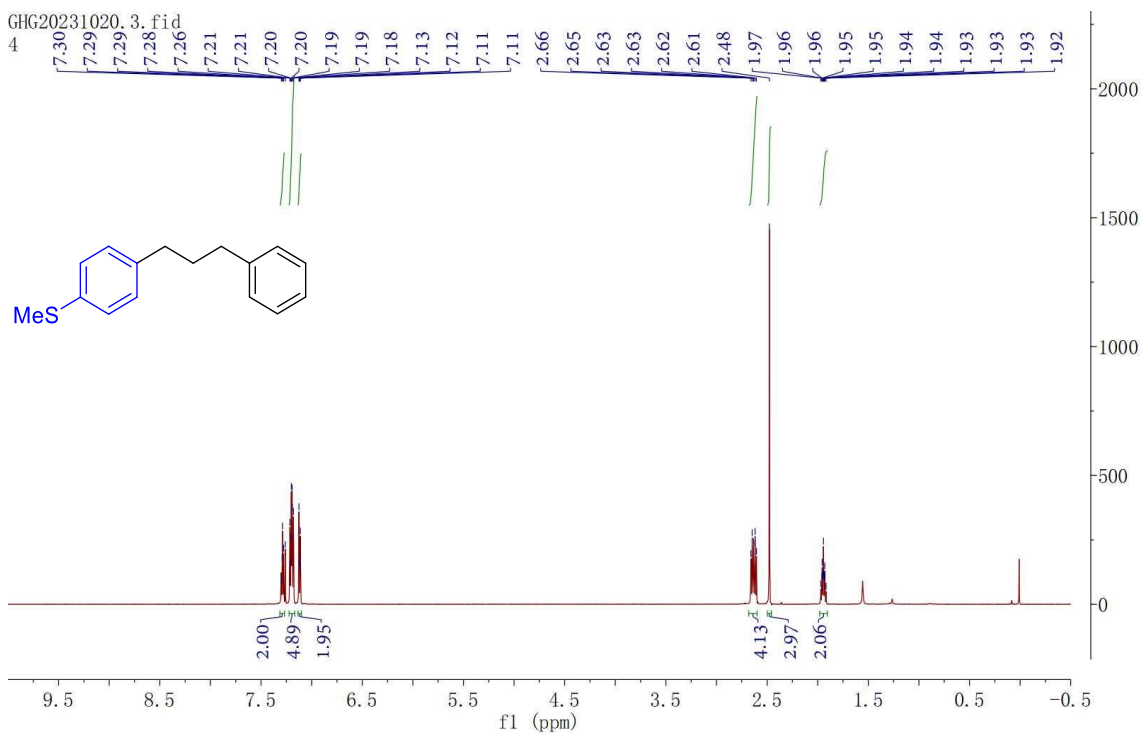

### 25, <sup>13</sup>C NMR (151 MHz, CDCl<sub>3</sub>)

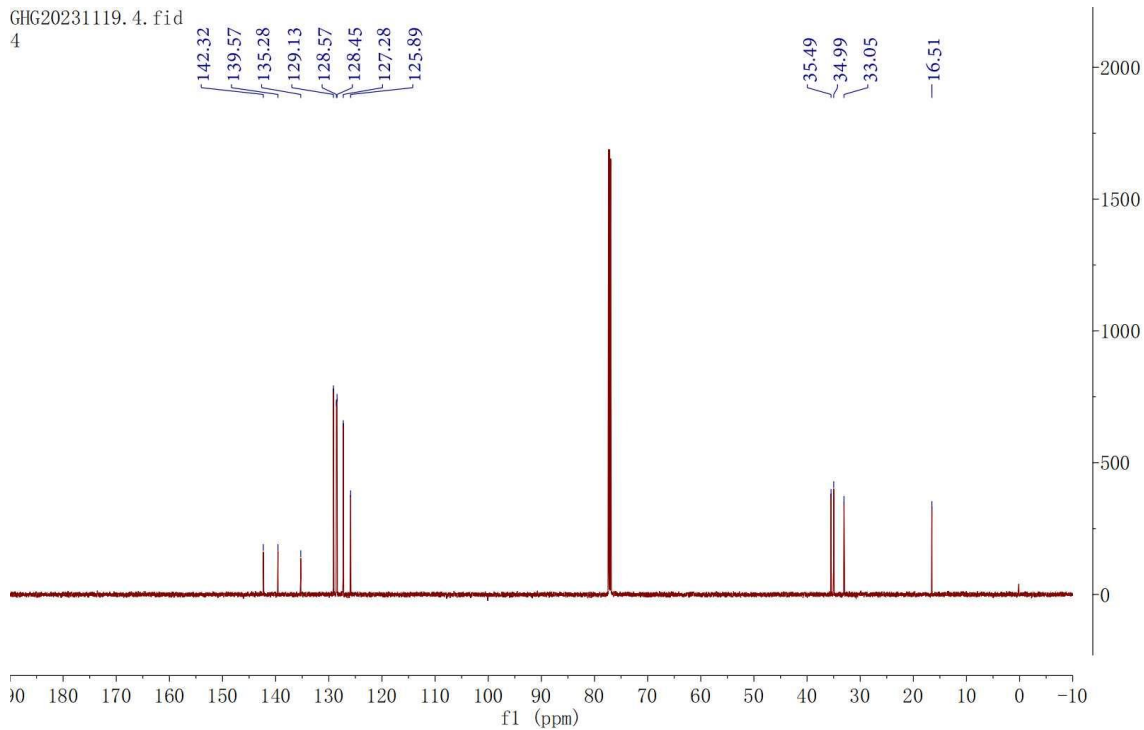

### 26, <sup>1</sup>H-NMR (600 MHz, CDCl<sub>3</sub>)

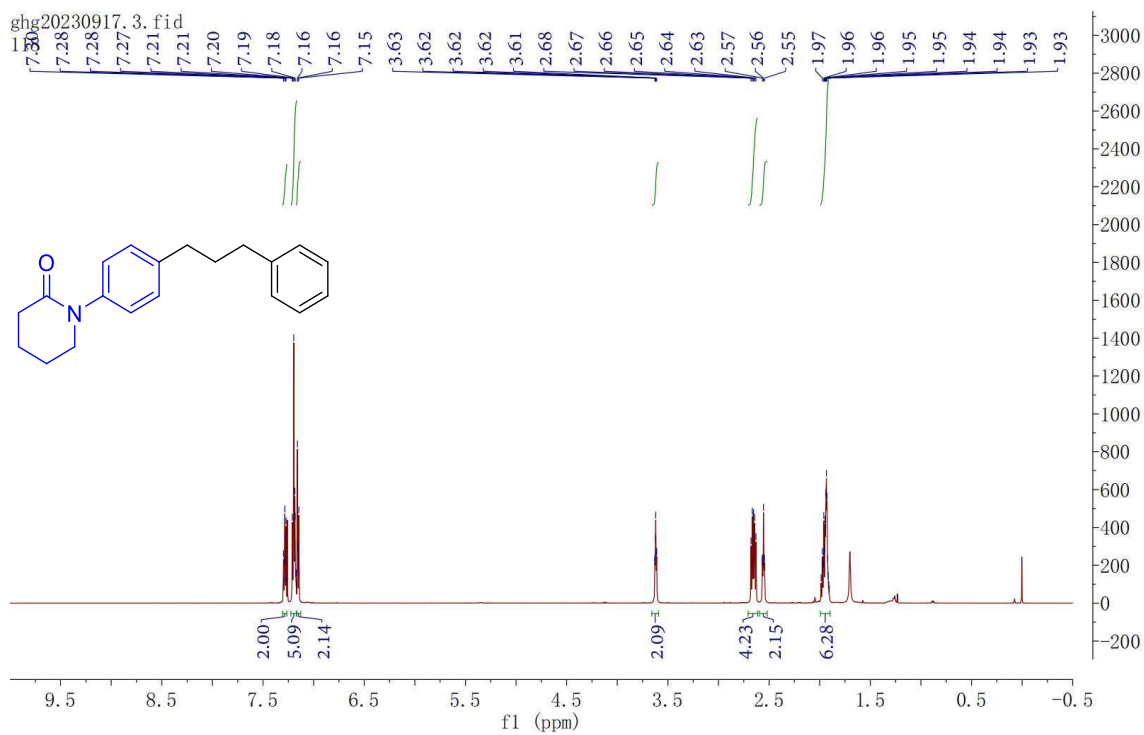

### 27, <sup>1</sup>H-NMR (600 MHz, CDCl<sub>3</sub>)

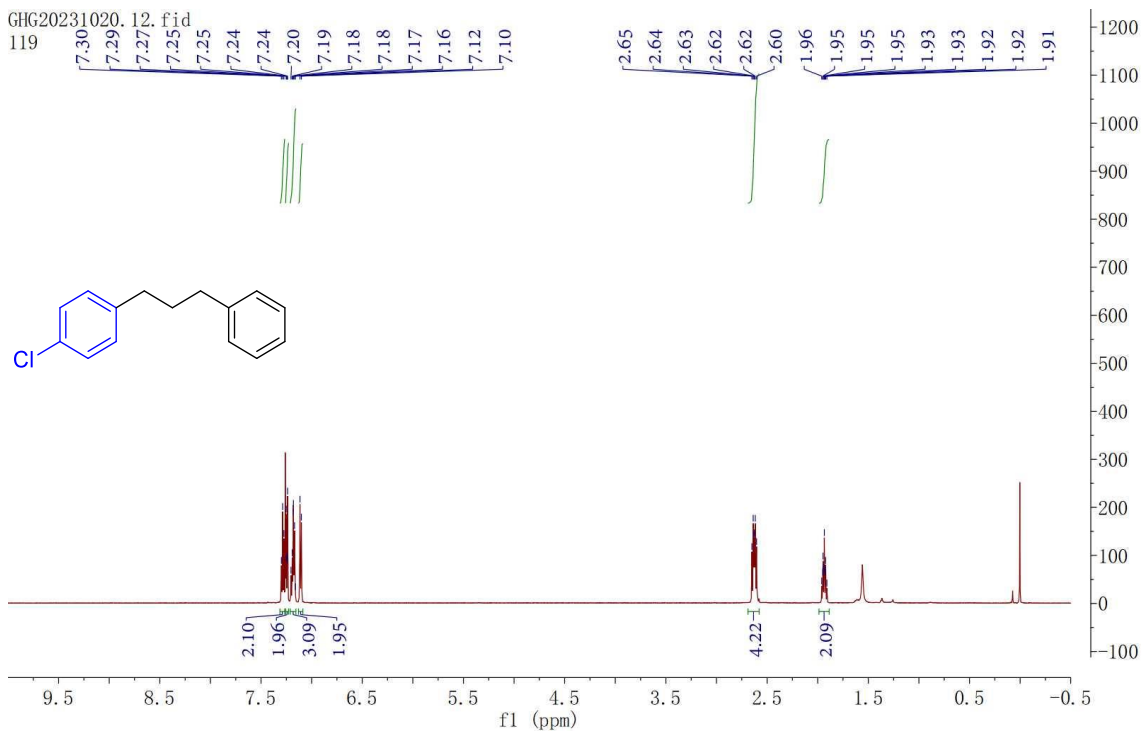

### 27, <sup>13</sup>C NMR (151 MHz, CDCl<sub>3</sub>)

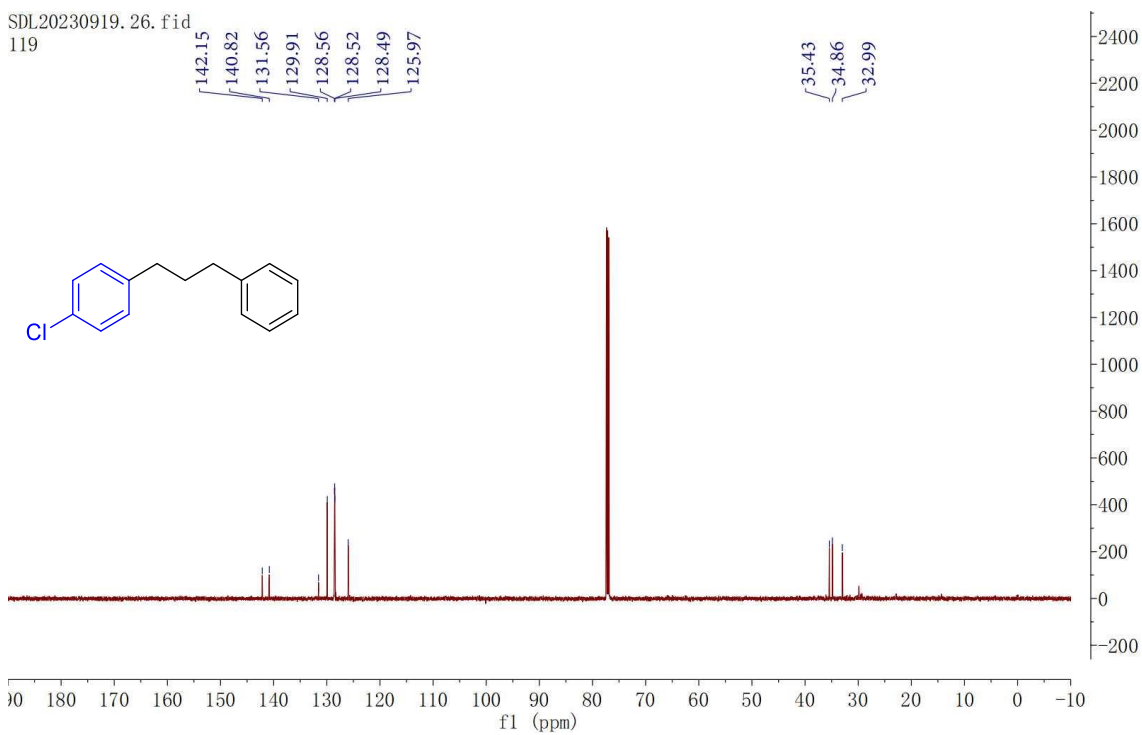

### 28, <sup>1</sup>H-NMR (600 MHz, CDCl<sub>3</sub>)

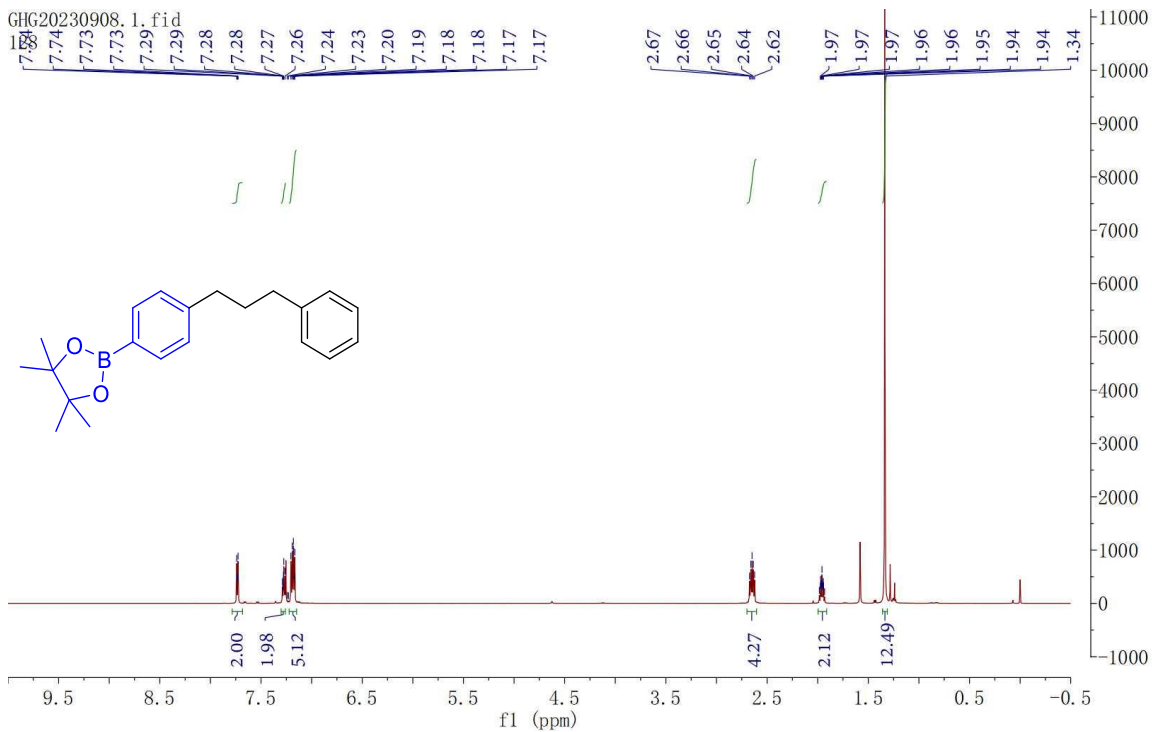

### 28, <sup>13</sup>C NMR (151 MHz, CDCl<sub>3</sub>)

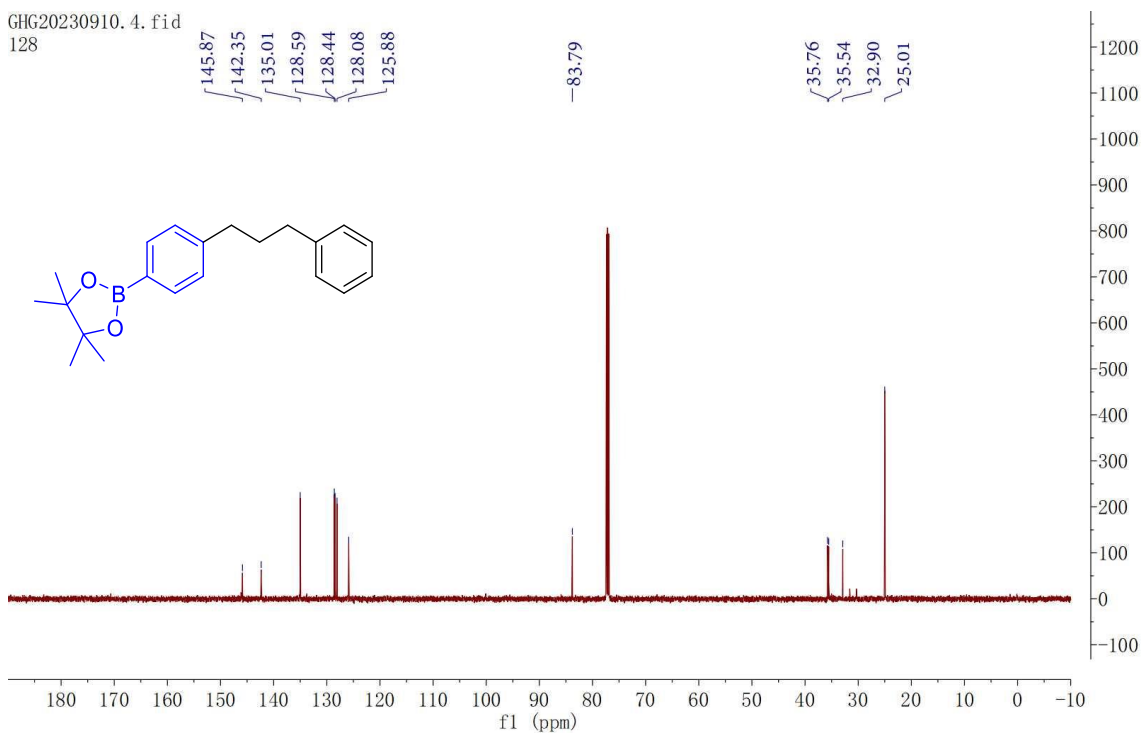

29, <sup>1</sup>H-NMR (600 MHz, CDCl<sub>3</sub>)

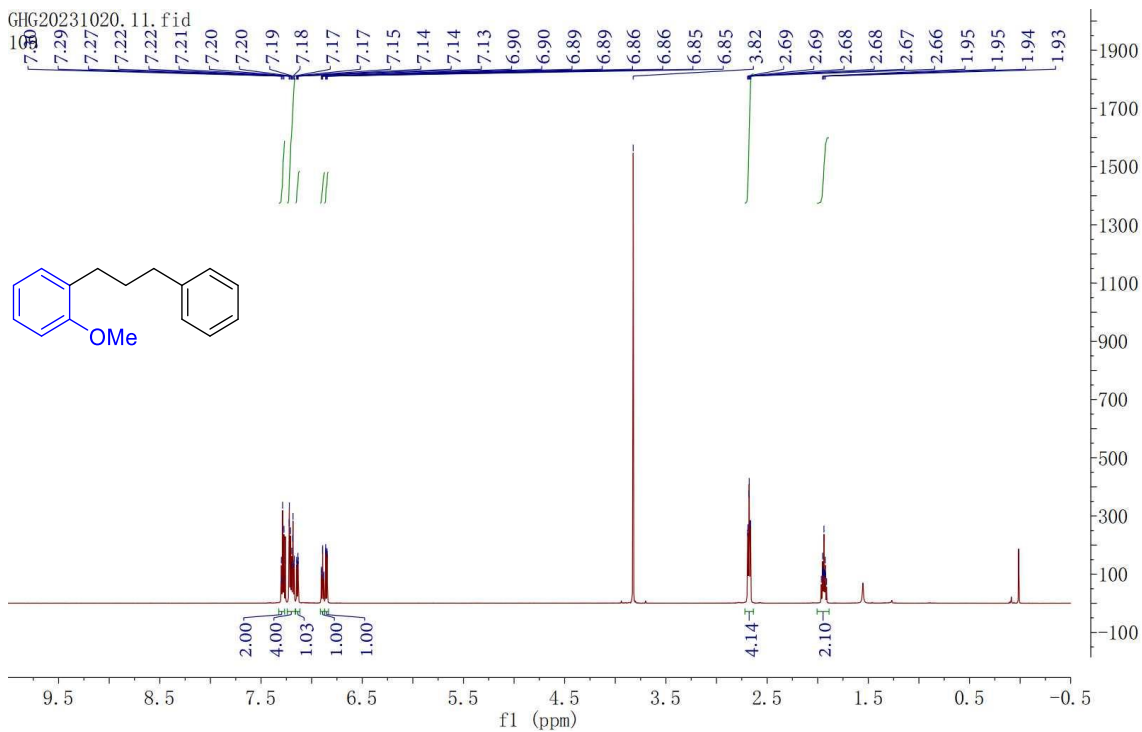

29, <sup>13</sup>C NMR (151 MHz, CDCl<sub>3</sub>)

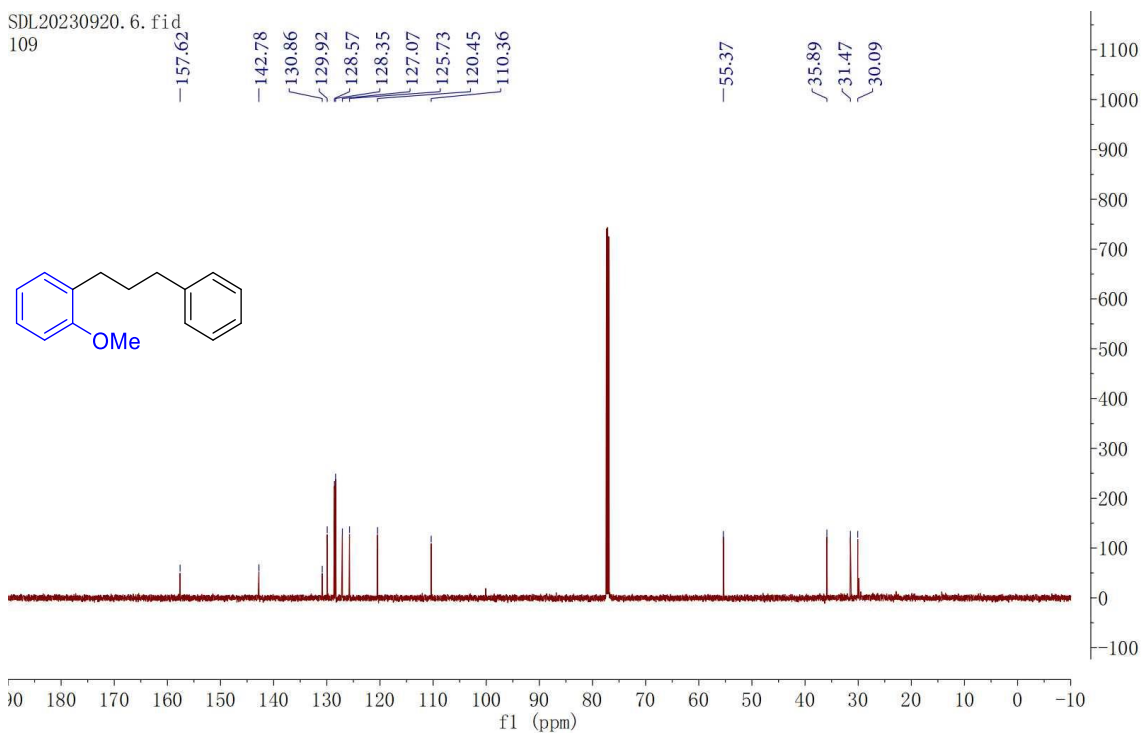

**30, <sup>1</sup>H-NMR (600 MHz, CDCl<sub>3</sub>)**

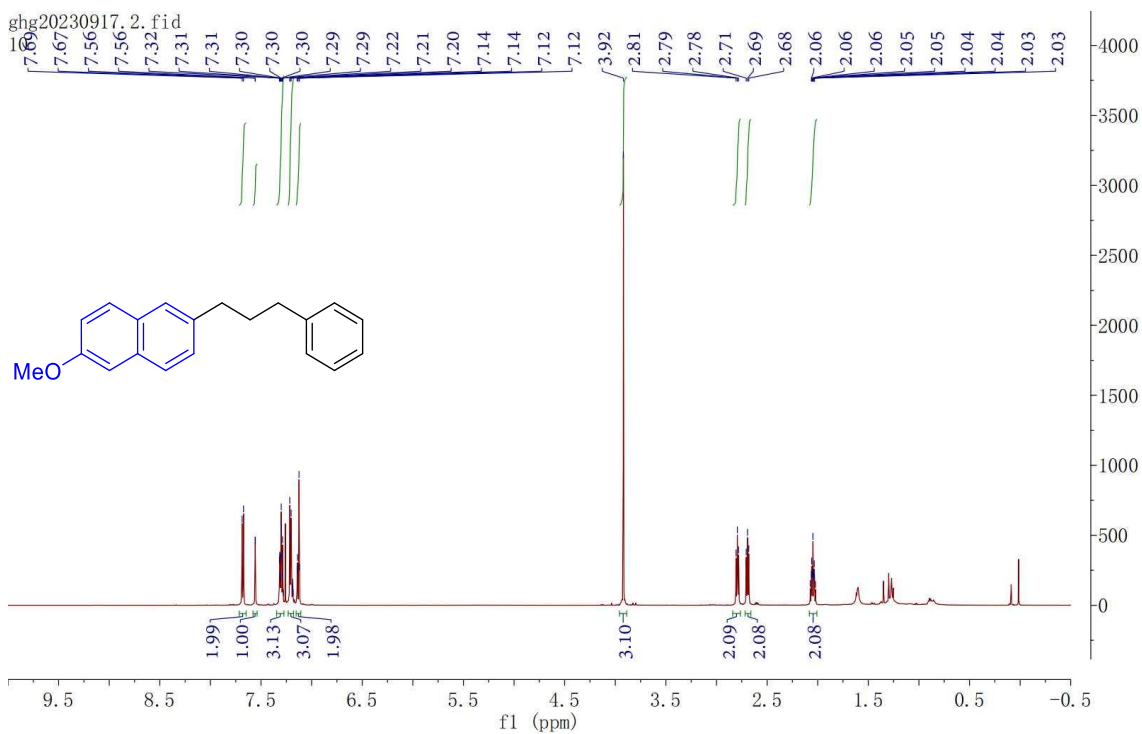

**30, <sup>13</sup>C NMR (151 MHz, CDCl<sub>3</sub>)**

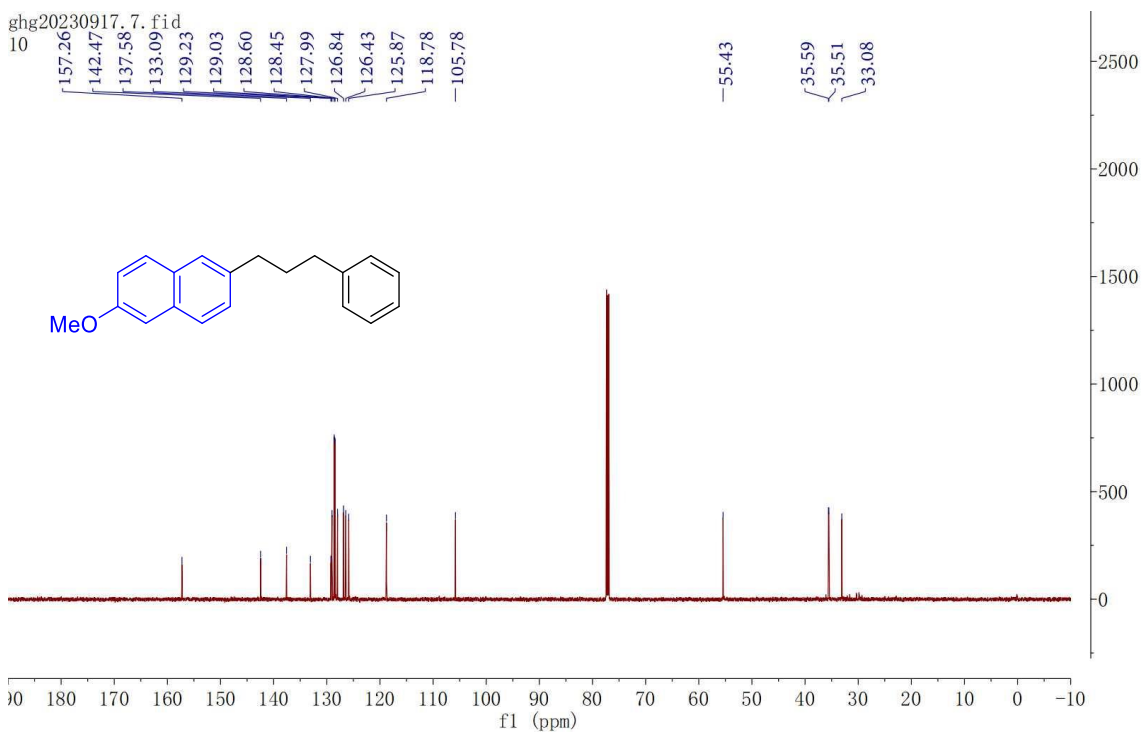



31, <sup>1</sup>H-NMR (600 MHz, CDCl<sub>3</sub>)

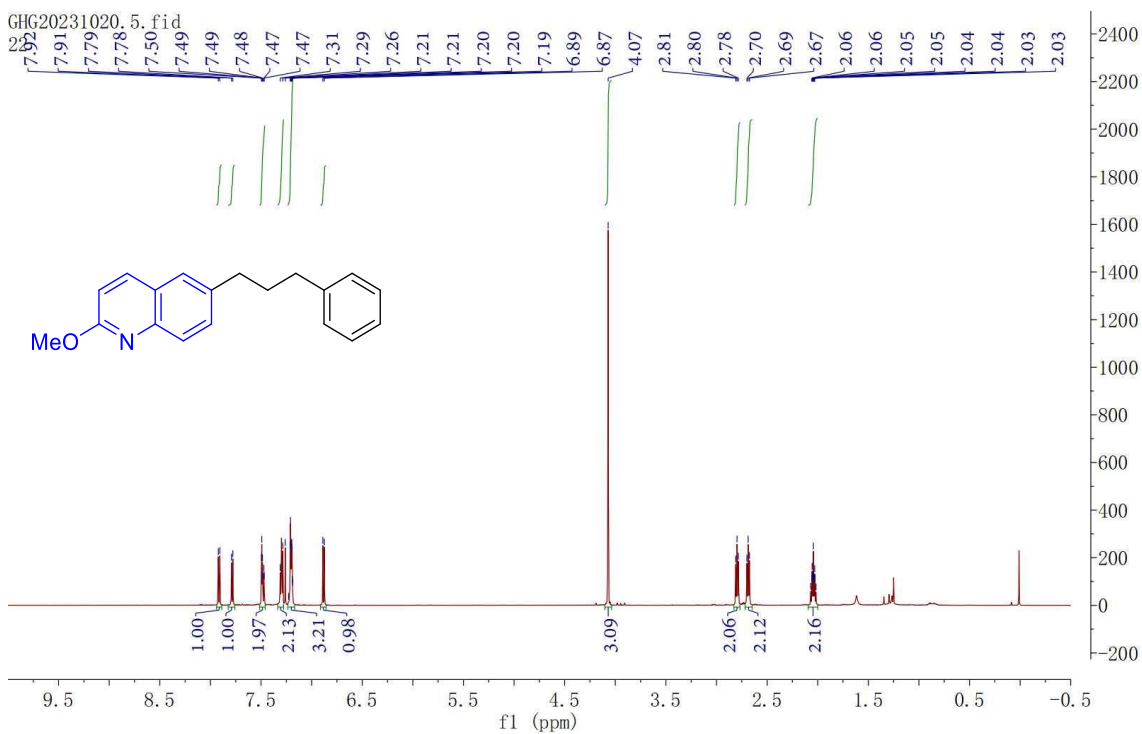

31, <sup>13</sup>C NMR (151 MHz, CDCl<sub>3</sub>)

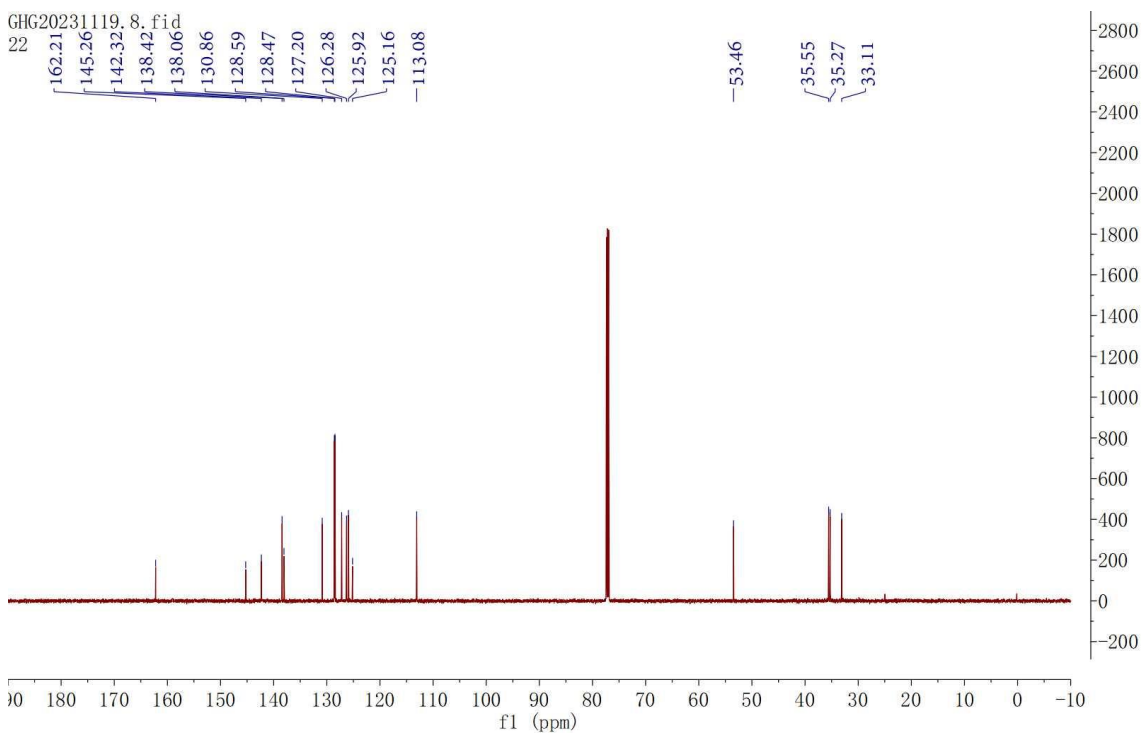

### 32, <sup>1</sup>H-NMR (600 MHz, CDCl<sub>3</sub>)

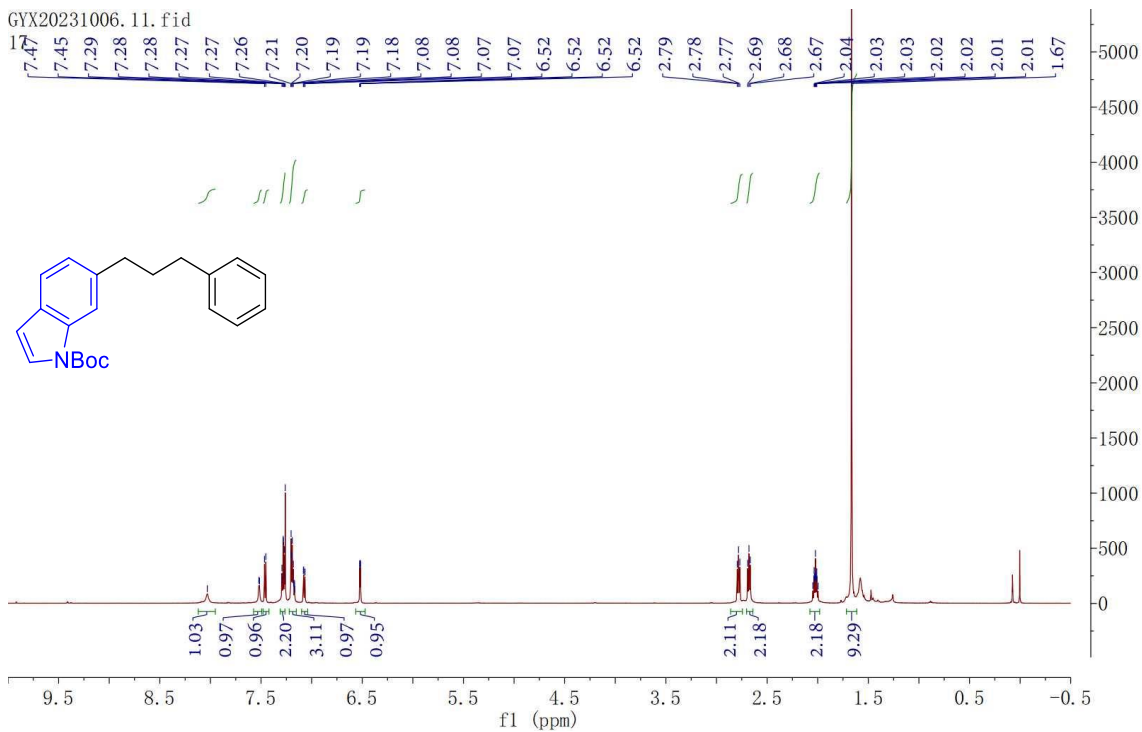

### 32, <sup>13</sup>C NMR (151 MHz, CDCl<sub>3</sub>)

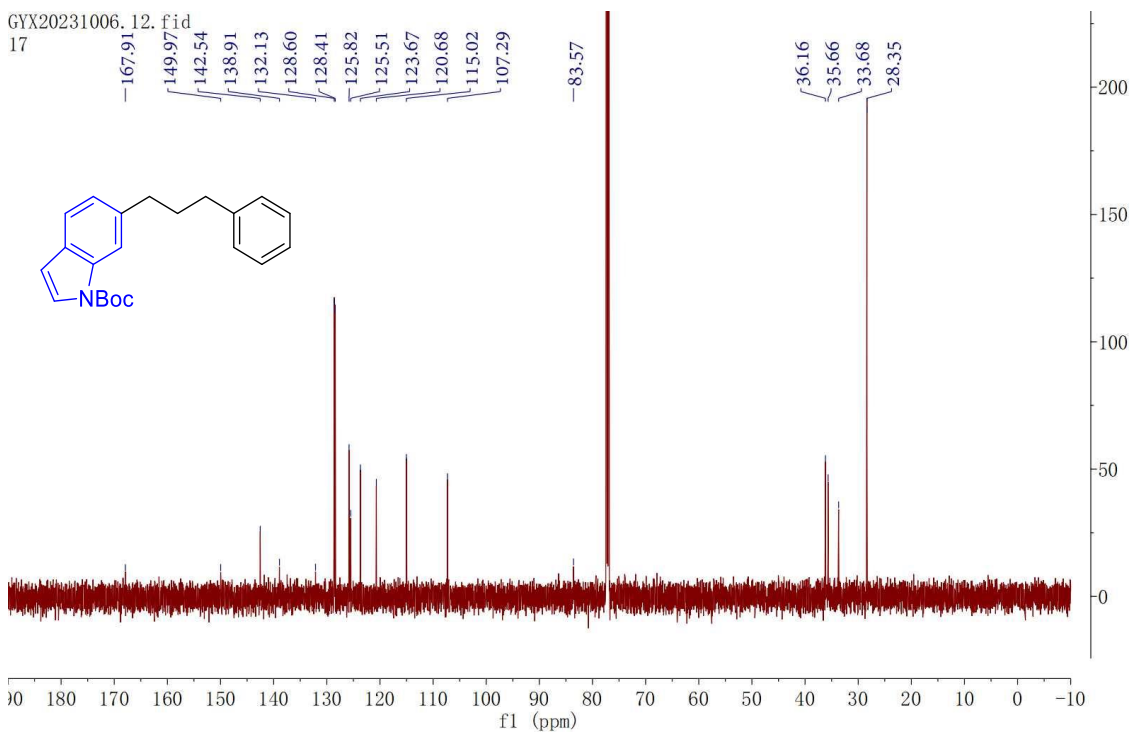

**33, <sup>1</sup>H-NMR (600 MHz, CDCl<sub>3</sub>)**

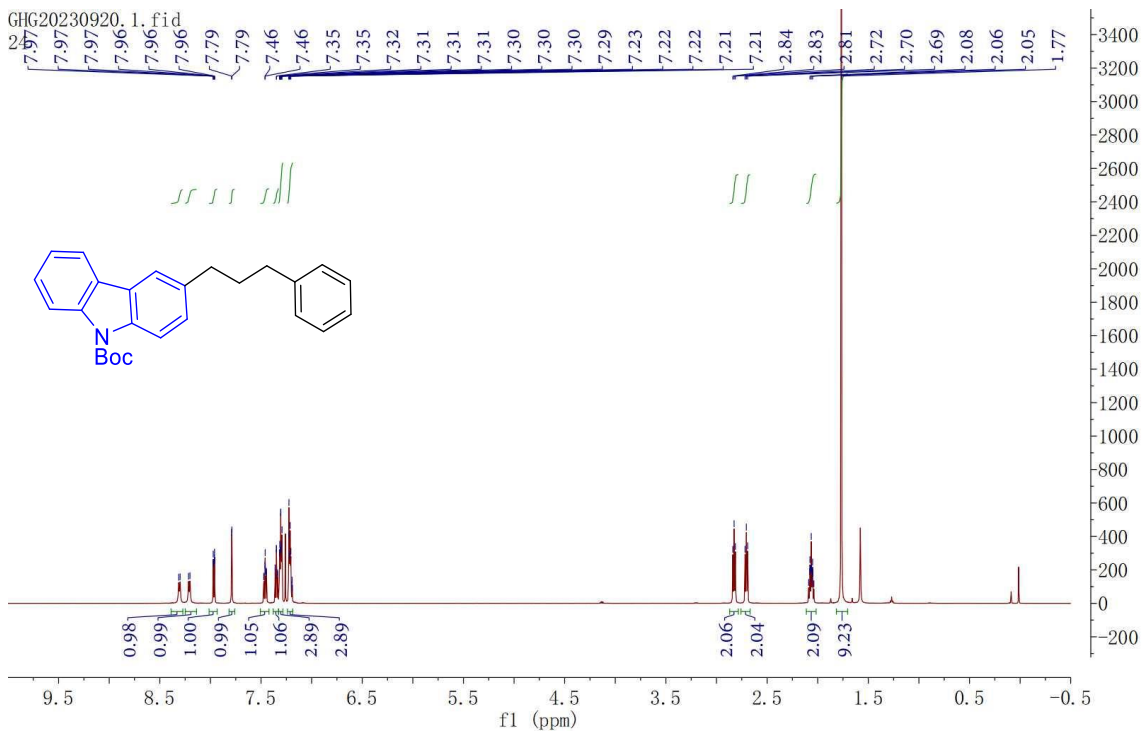

**33, <sup>13</sup>C NMR (151 MHz, CDCl<sub>3</sub>)**

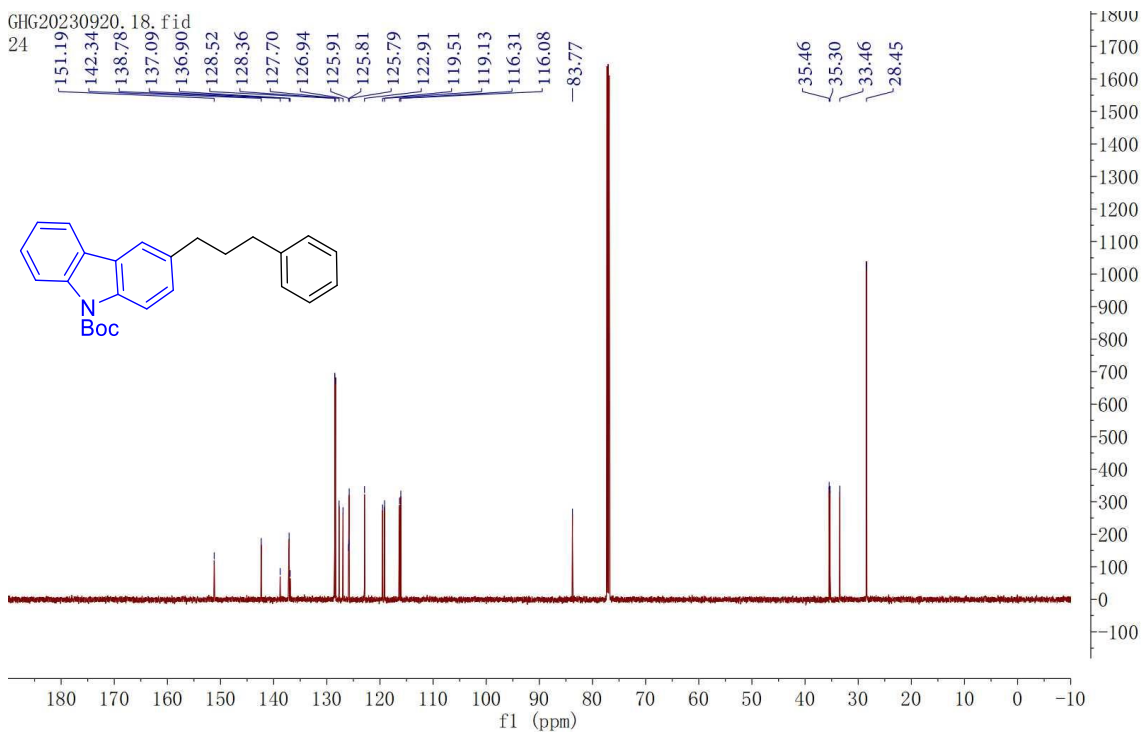

### 34, <sup>1</sup>H-NMR (600 MHz, CDCl<sub>3</sub>)

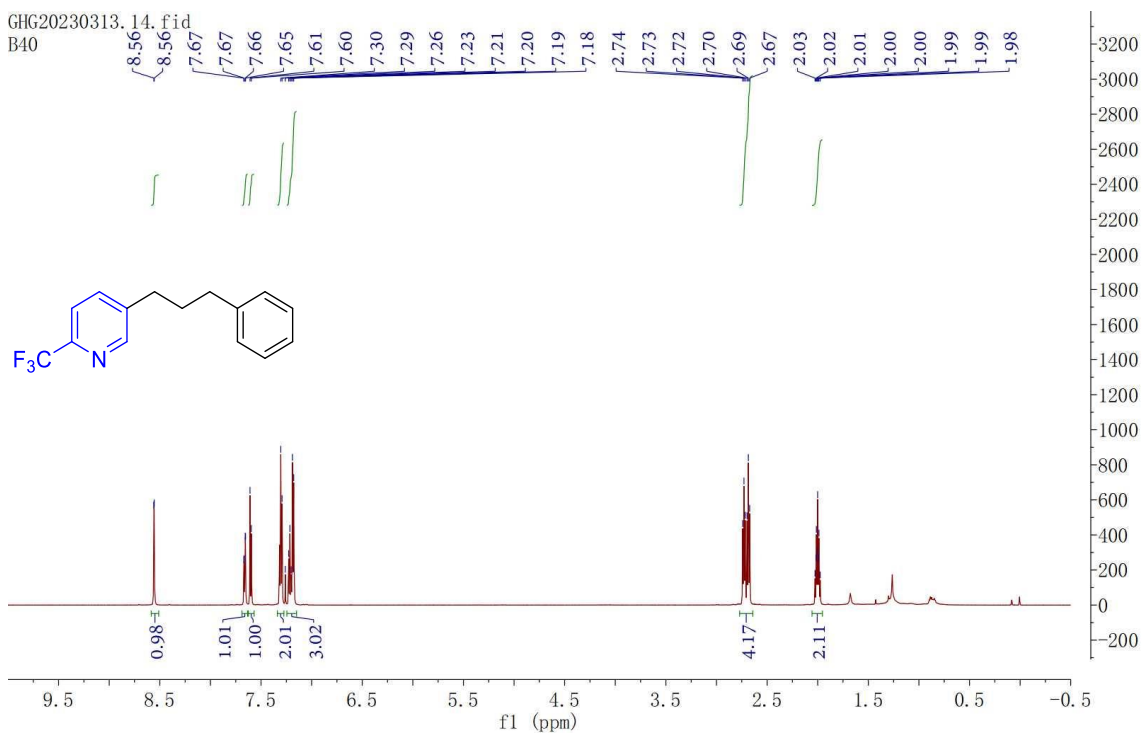

### 35, <sup>1</sup>H-NMR (600 MHz, CDCl<sub>3</sub>)

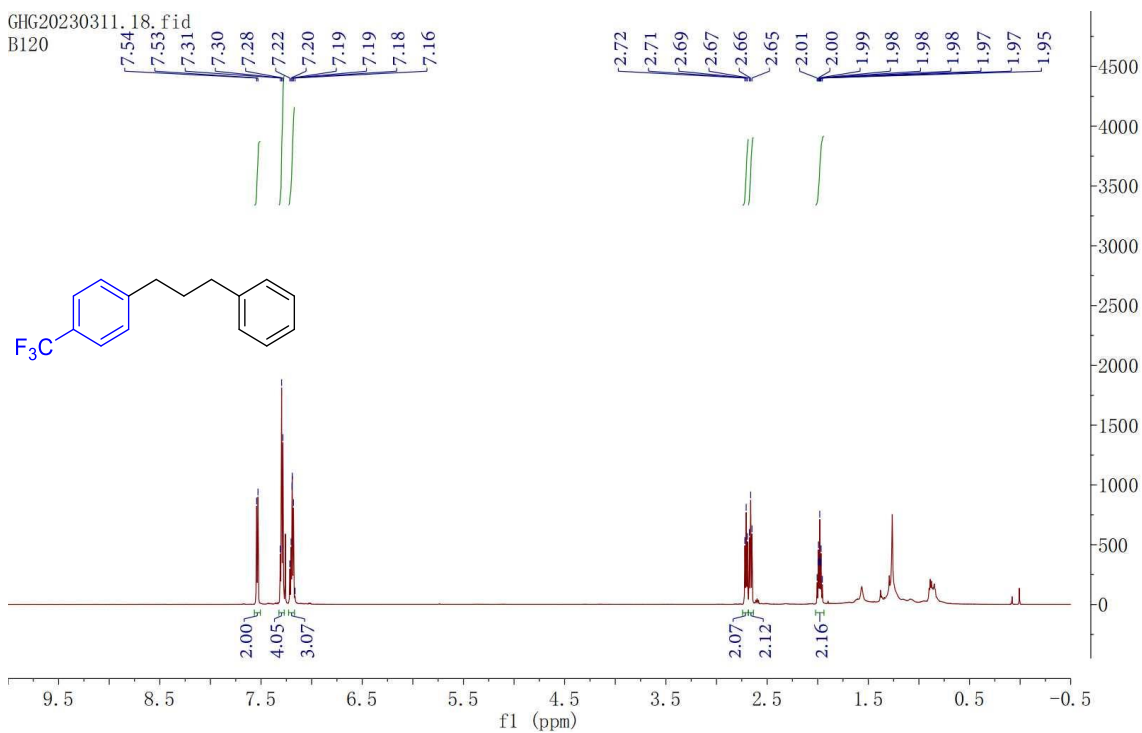

36, <sup>1</sup>H-NMR (600 MHz, CDCl<sub>3</sub>)

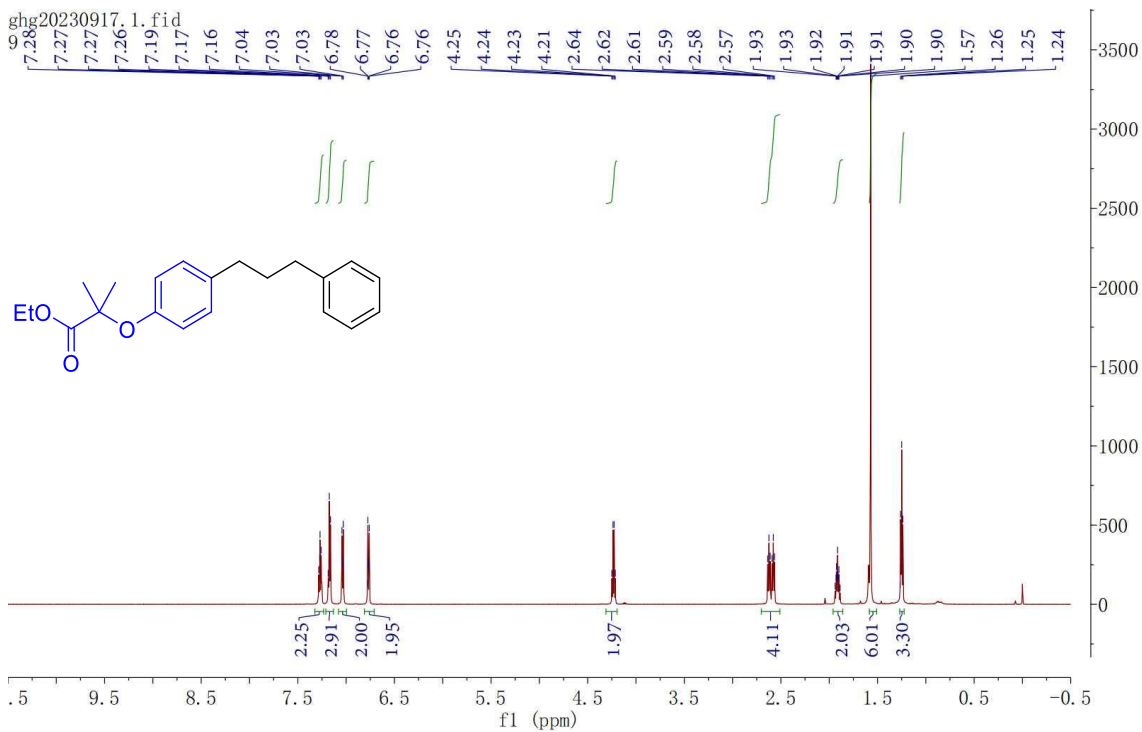

36, <sup>13</sup>C NMR (151 MHz, CDCl<sub>3</sub>)

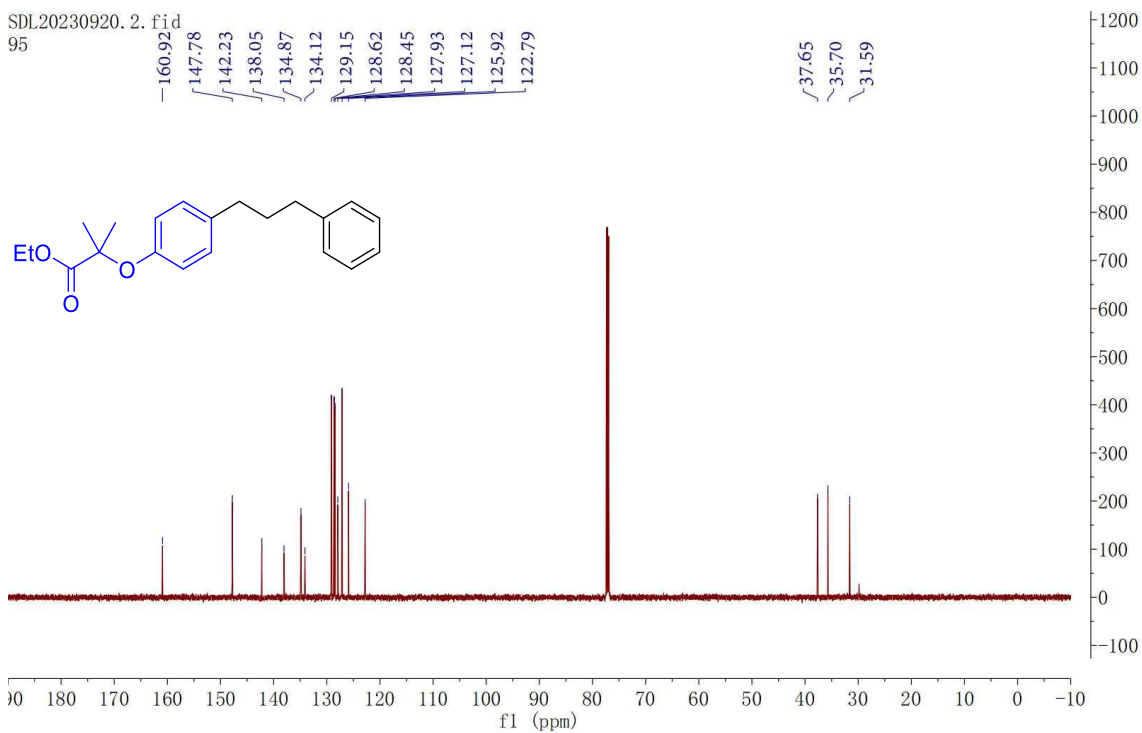

### 37, <sup>1</sup>H-NMR (600 MHz, CDCl<sub>3</sub>)

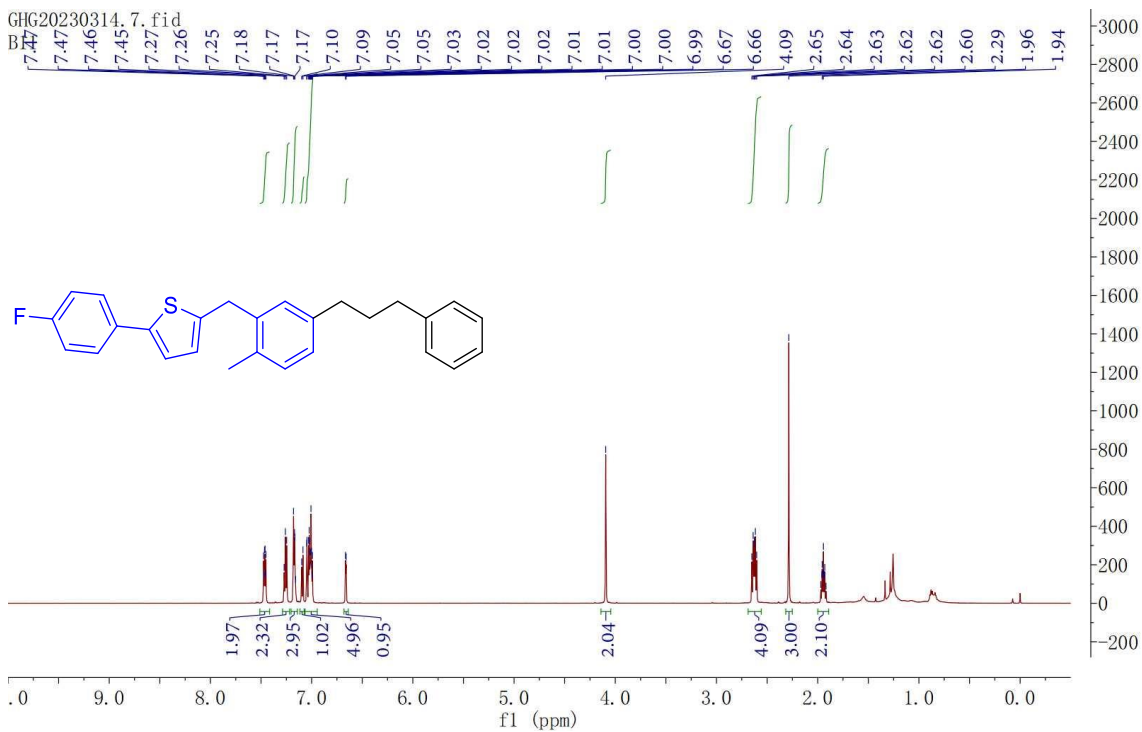

### 37, <sup>13</sup>C NMR (151 MHz, CDCl<sub>3</sub>)

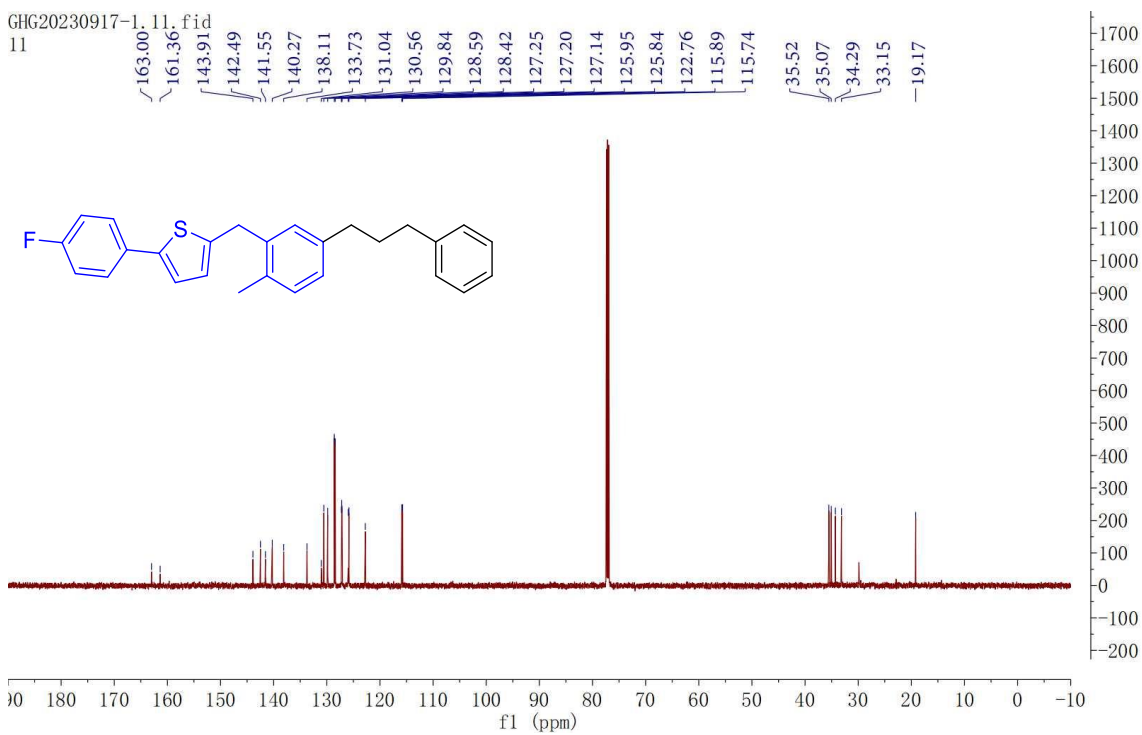

38, <sup>1</sup>H-NMR (600 MHz, CDCl<sub>3</sub>)

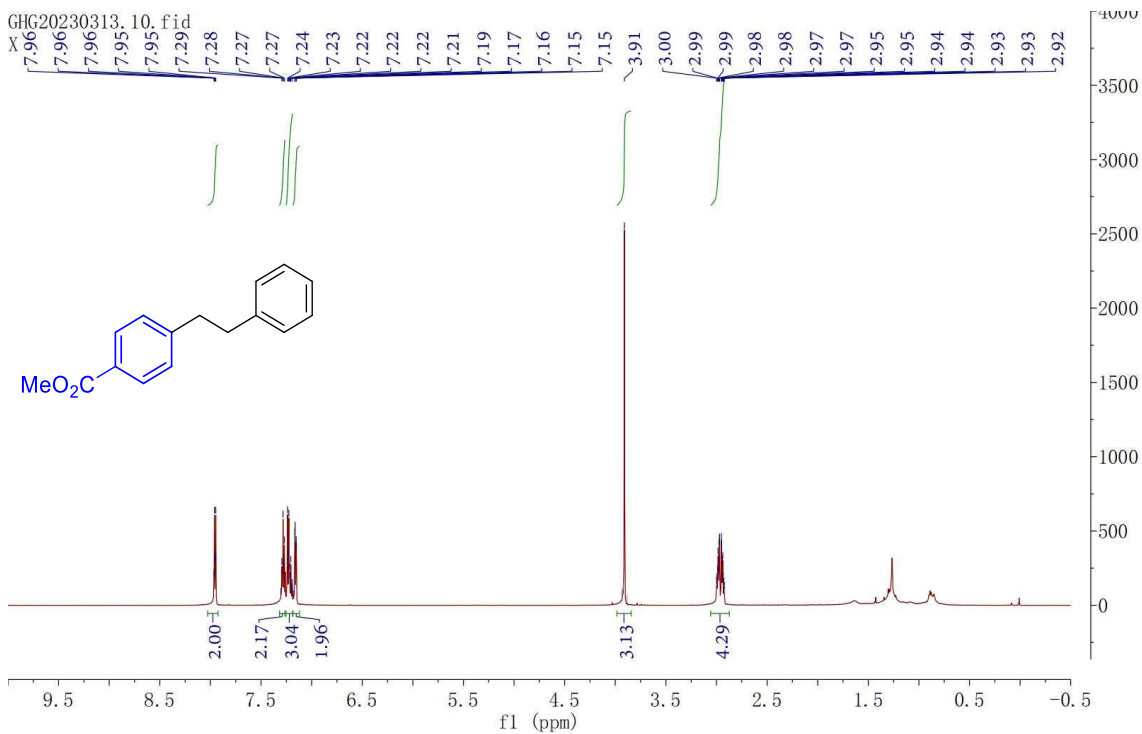

38, <sup>13</sup>C NMR (151 MHz, CDCl<sub>3</sub>)

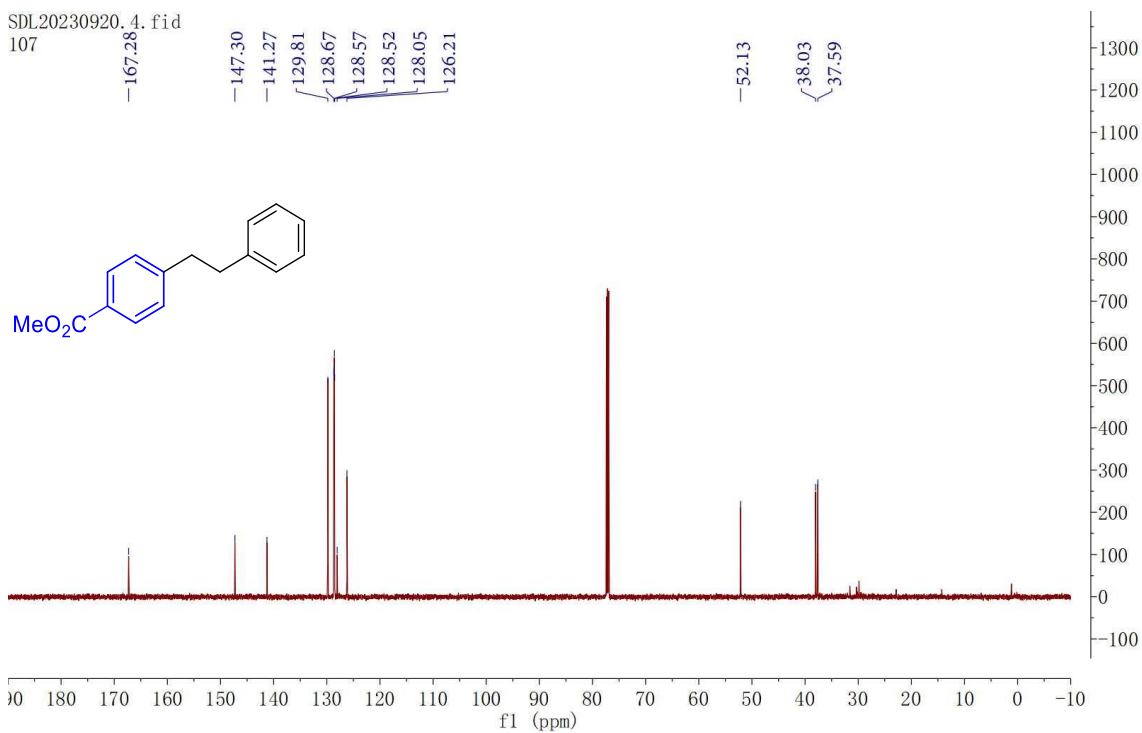

### 39, <sup>1</sup>H-NMR (600 MHz, CDCl<sub>3</sub>)

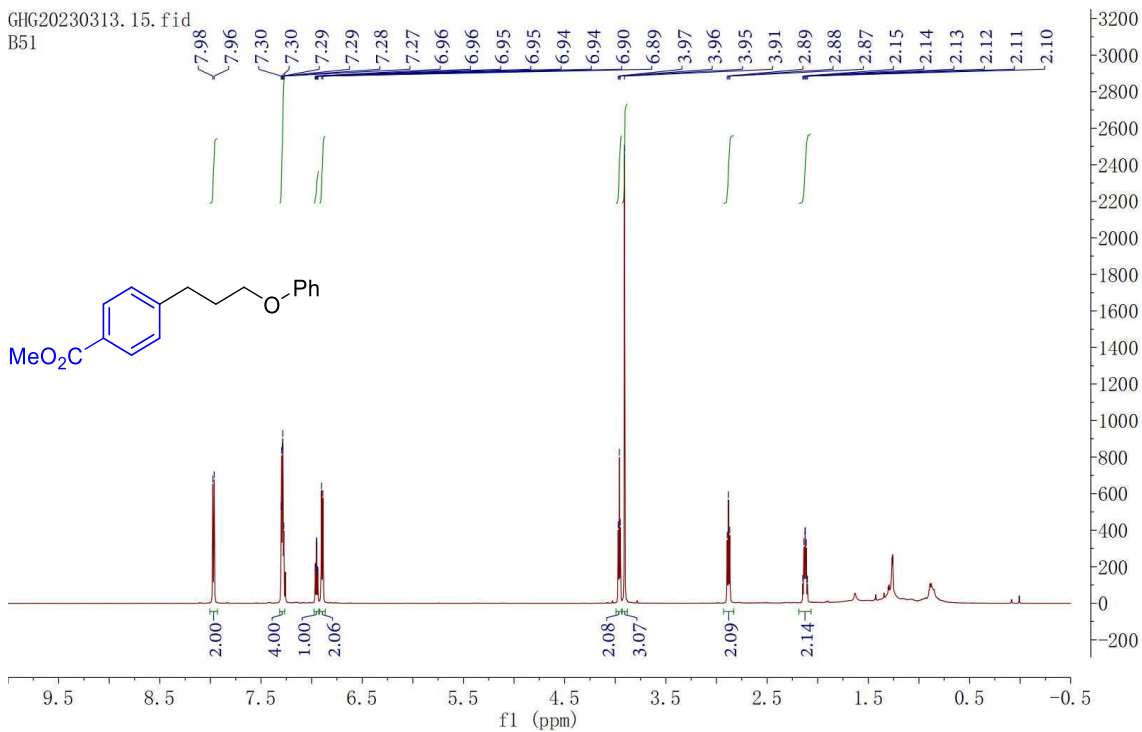

### 40, <sup>1</sup>H-NMR (600 MHz, CDCl<sub>3</sub>)

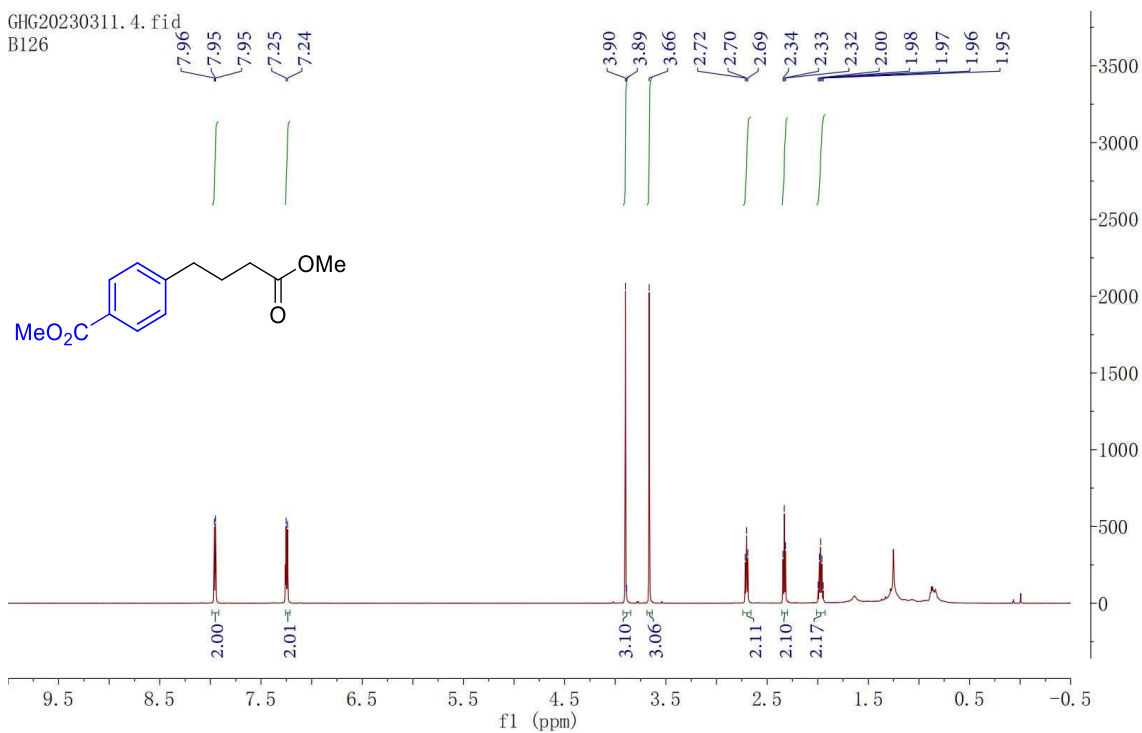



**40, <sup>13</sup>C NMR (151 MHz, CDCl<sub>3</sub>)**

SDL20230920\_14.fid  
126

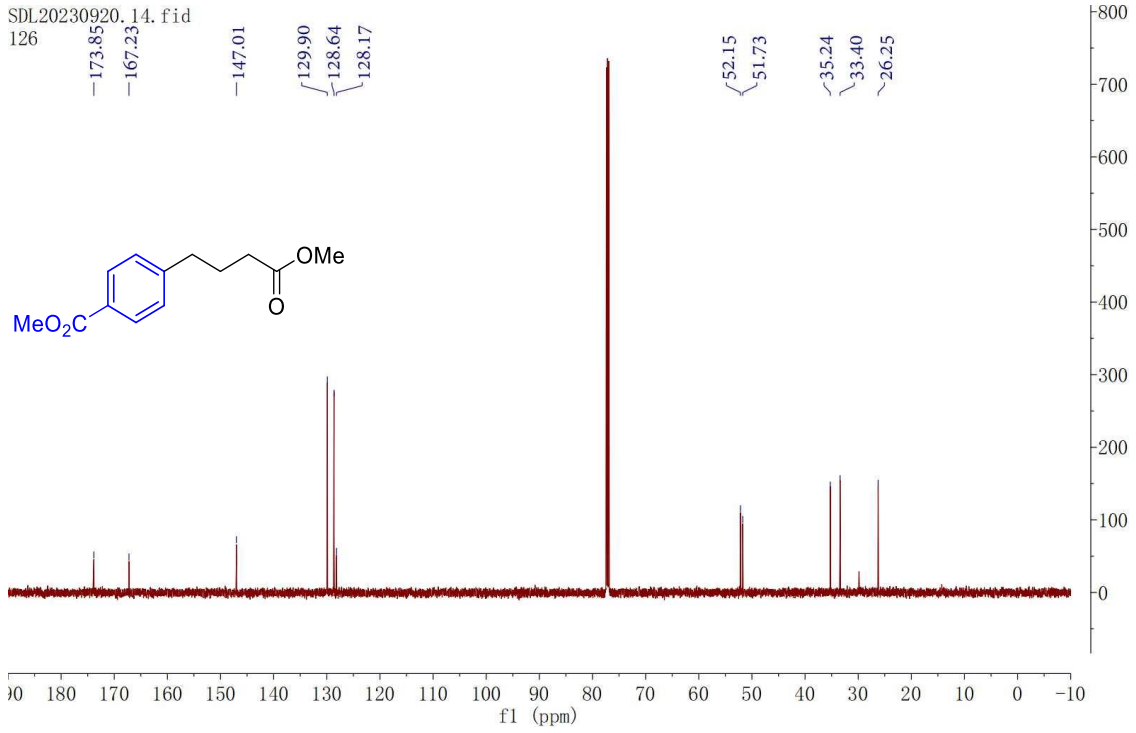

**41, <sup>1</sup>H-NMR (600 MHz, CDCl<sub>3</sub>)**

GYX20231006\_15.fid  
105

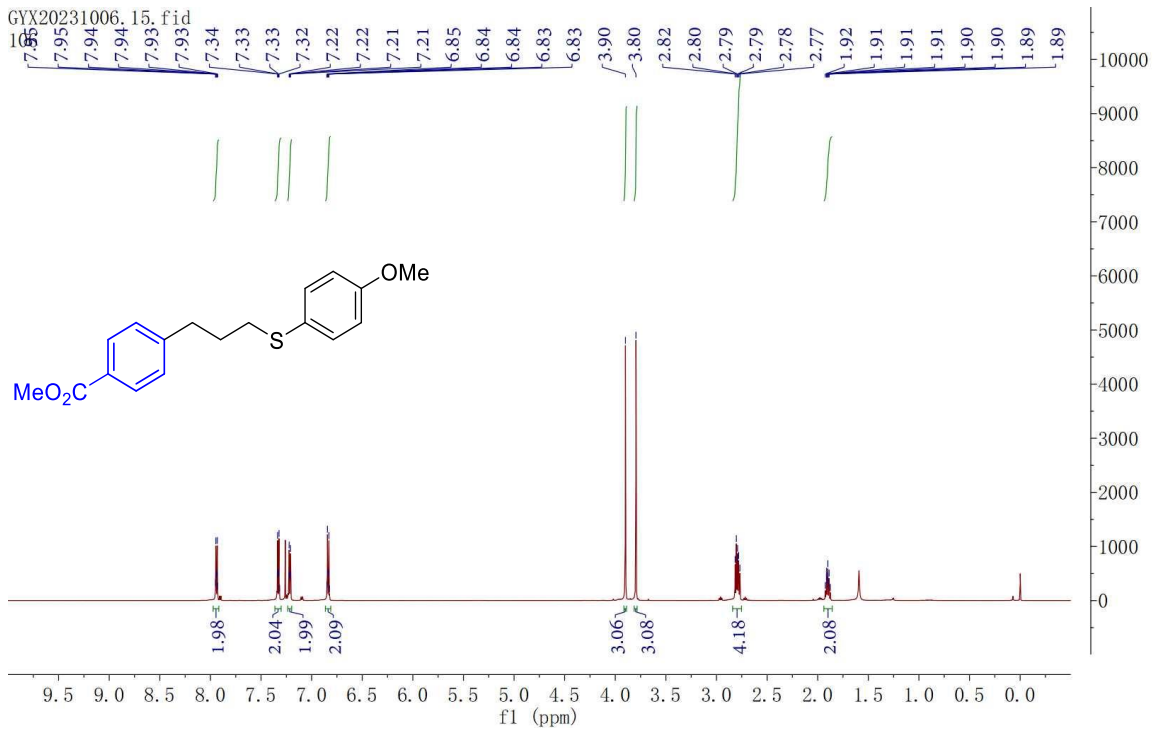

### 41, <sup>13</sup>C NMR (151 MHz, CDCl<sub>3</sub>)

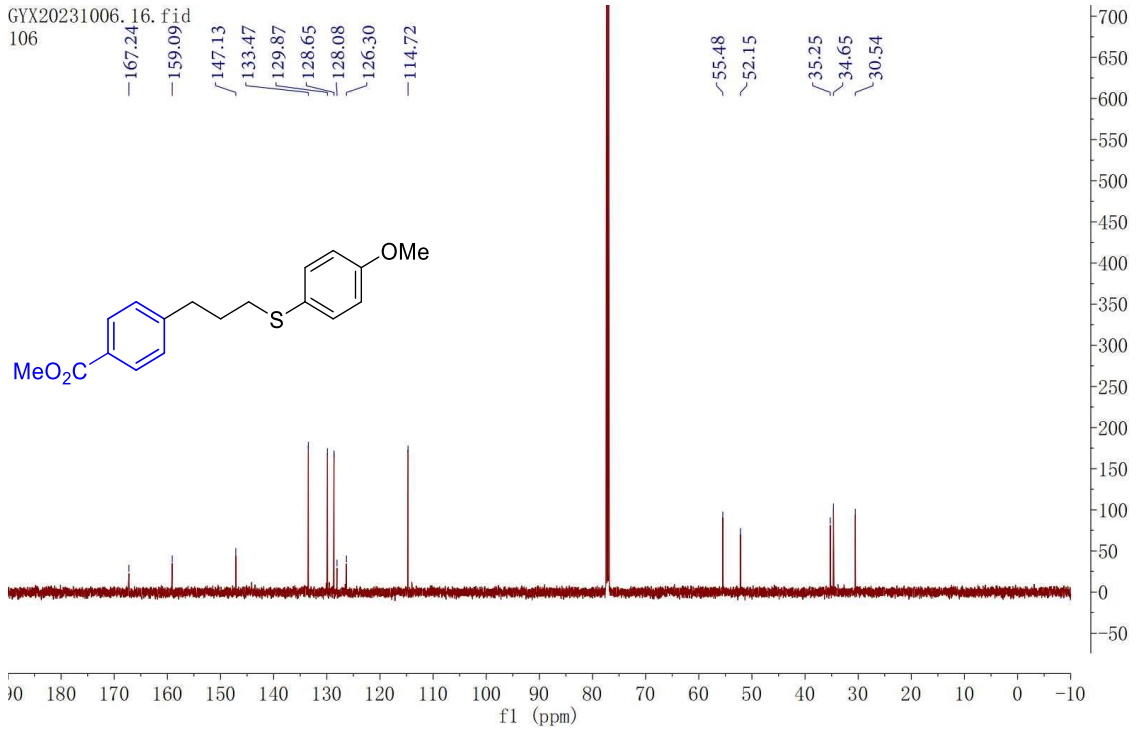

### 42, <sup>1</sup>H-NMR (600 MHz, CDCl<sub>3</sub>)

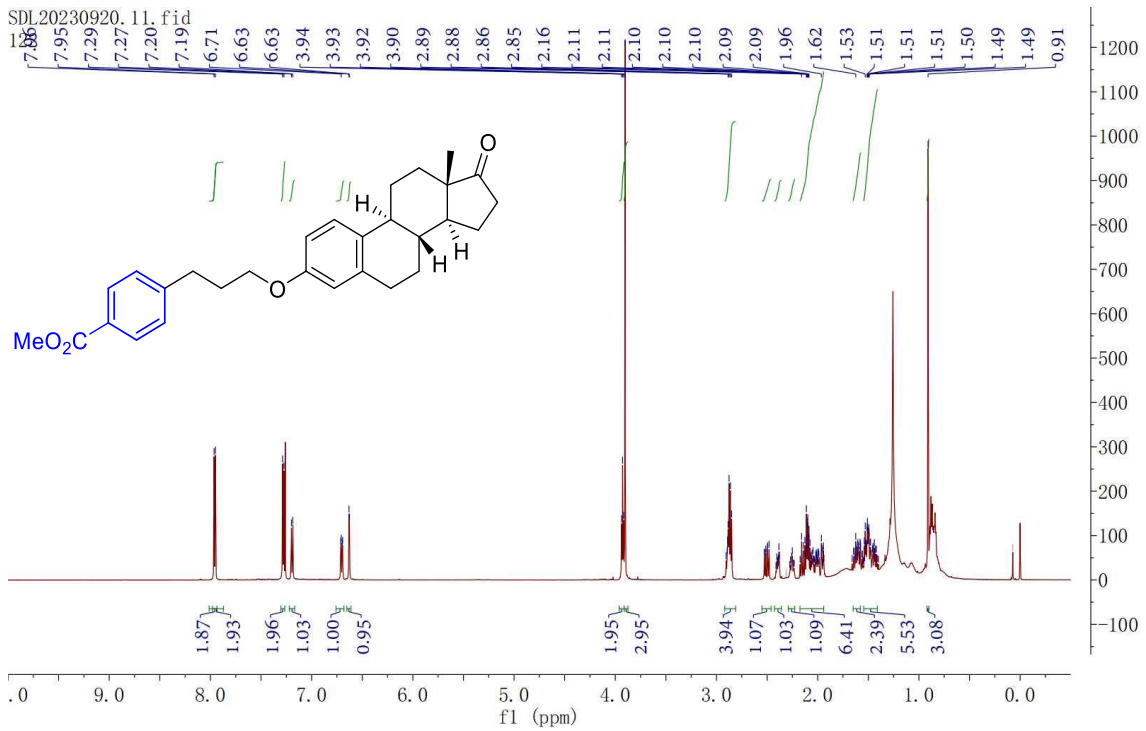

### 42, <sup>13</sup>C NMR (151 MHz, CDCl<sub>3</sub>)

GHG20231119. 12. fid  
122

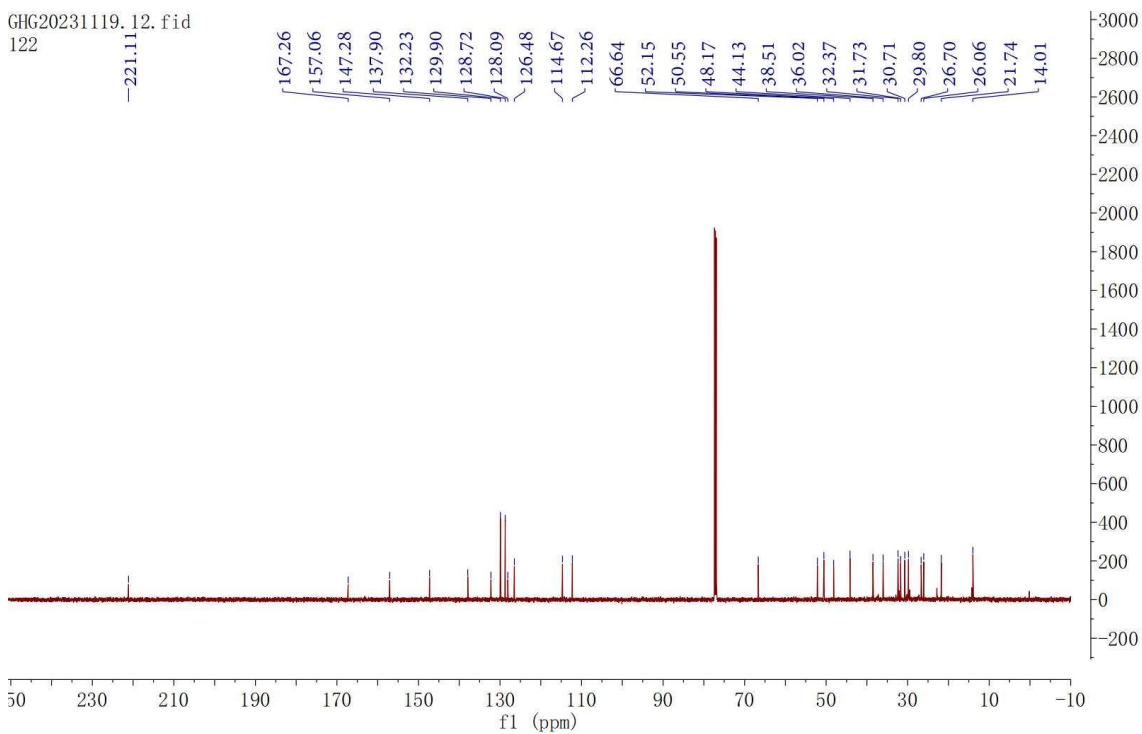

### 43, <sup>1</sup>H-NMR (600 MHz, CDCl<sub>3</sub>)

GHG20230313. 4. fid  
B113

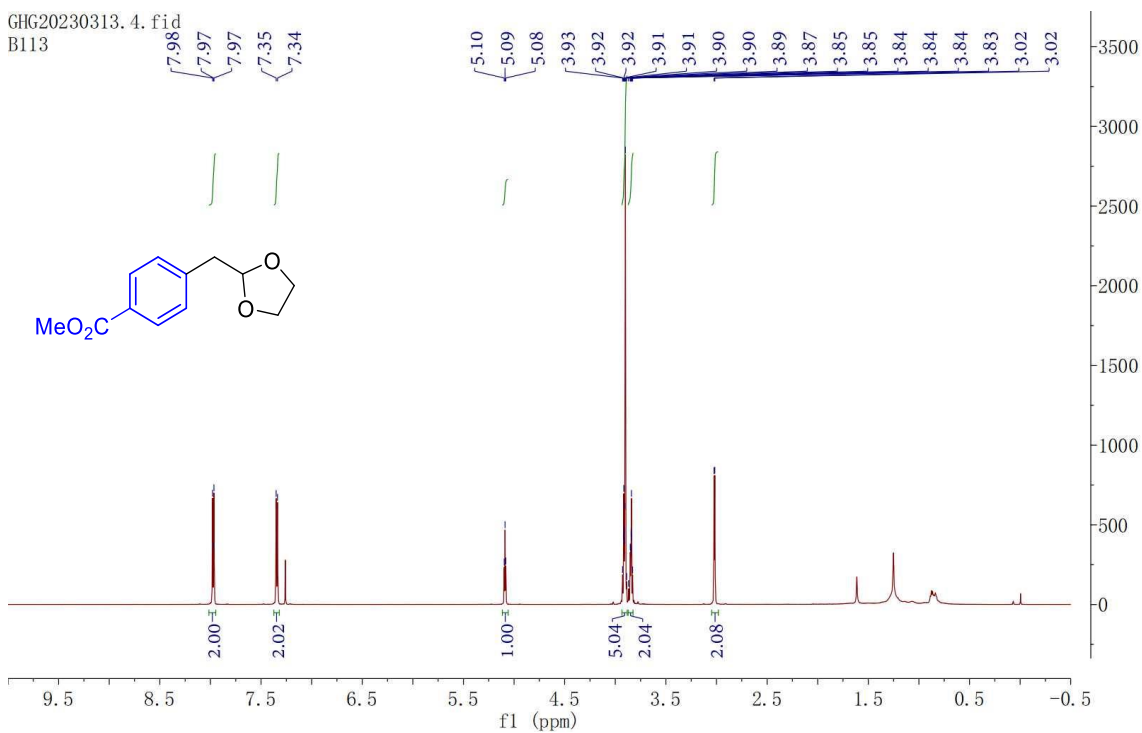

43, <sup>13</sup>C NMR (151 MHz, CDCl<sub>3</sub>)

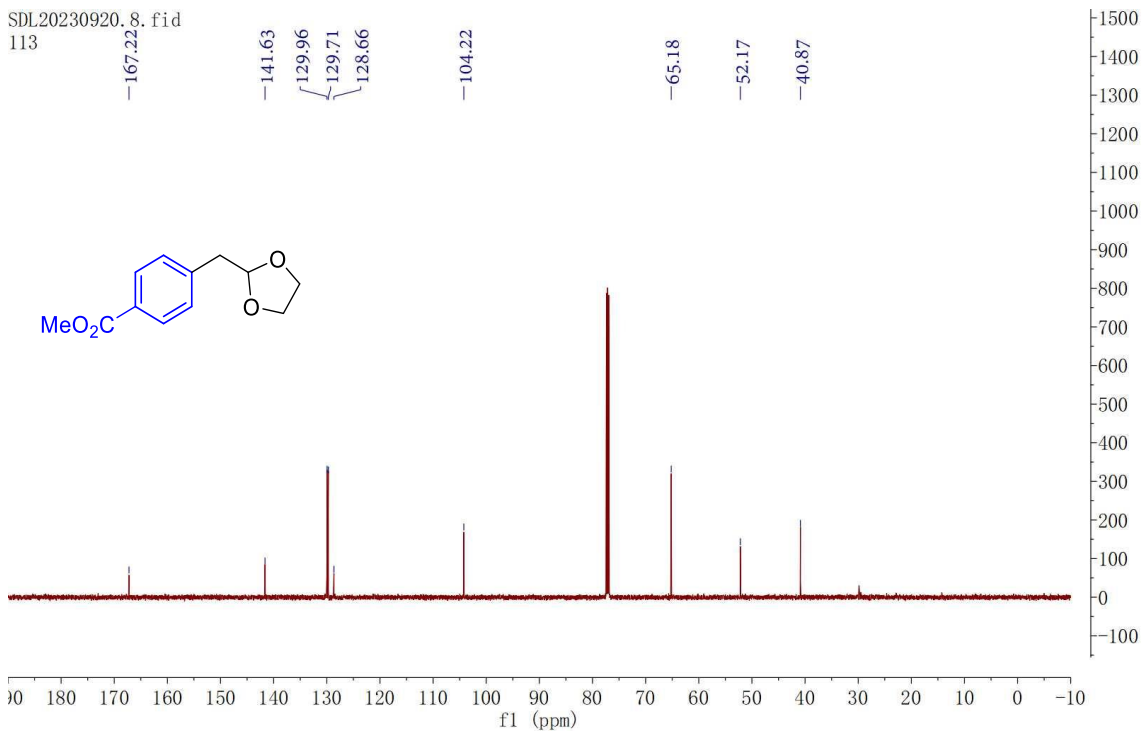

44, <sup>1</sup>H-NMR (600 MHz, CDCl<sub>3</sub>)

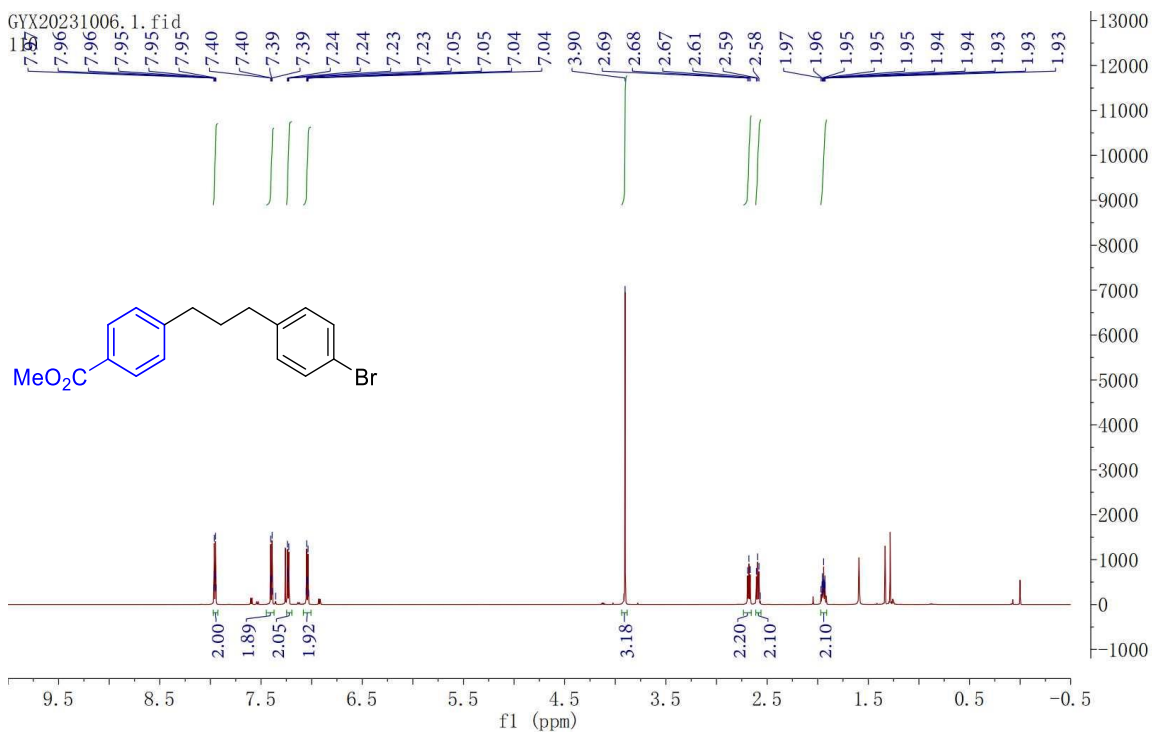

44, <sup>13</sup>C NMR (151 MHz, CDCl<sub>3</sub>)

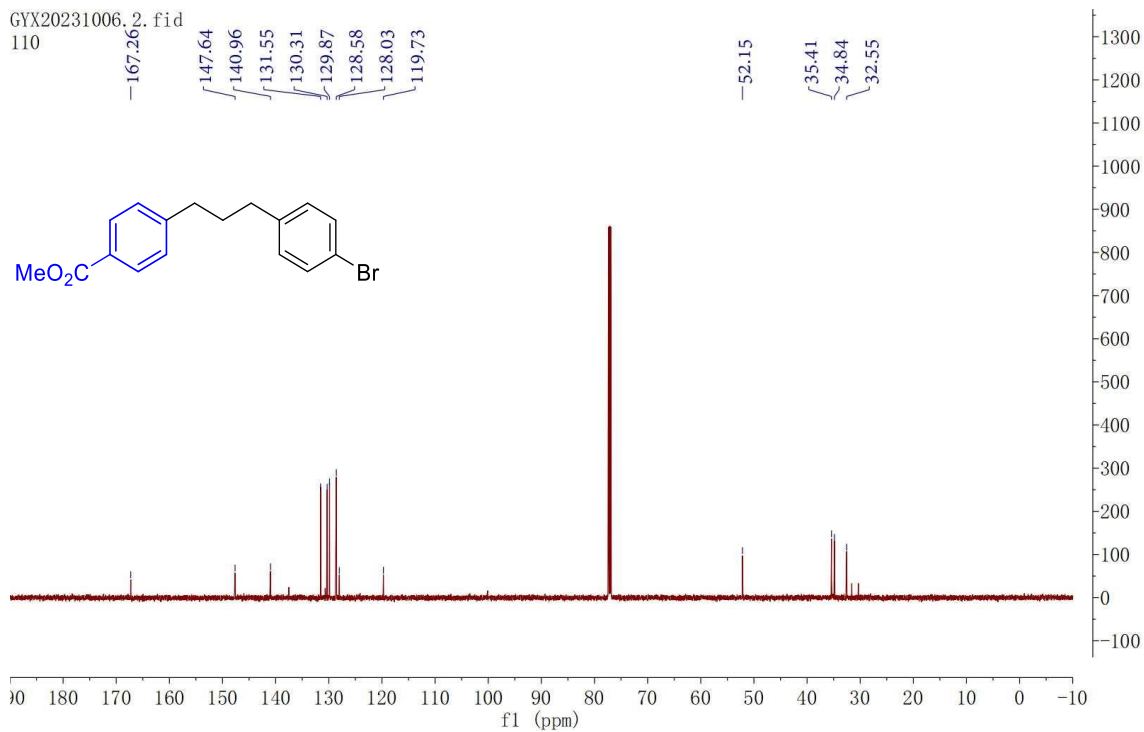

45, <sup>1</sup>H-NMR (600 MHz, CDCl<sub>3</sub>)

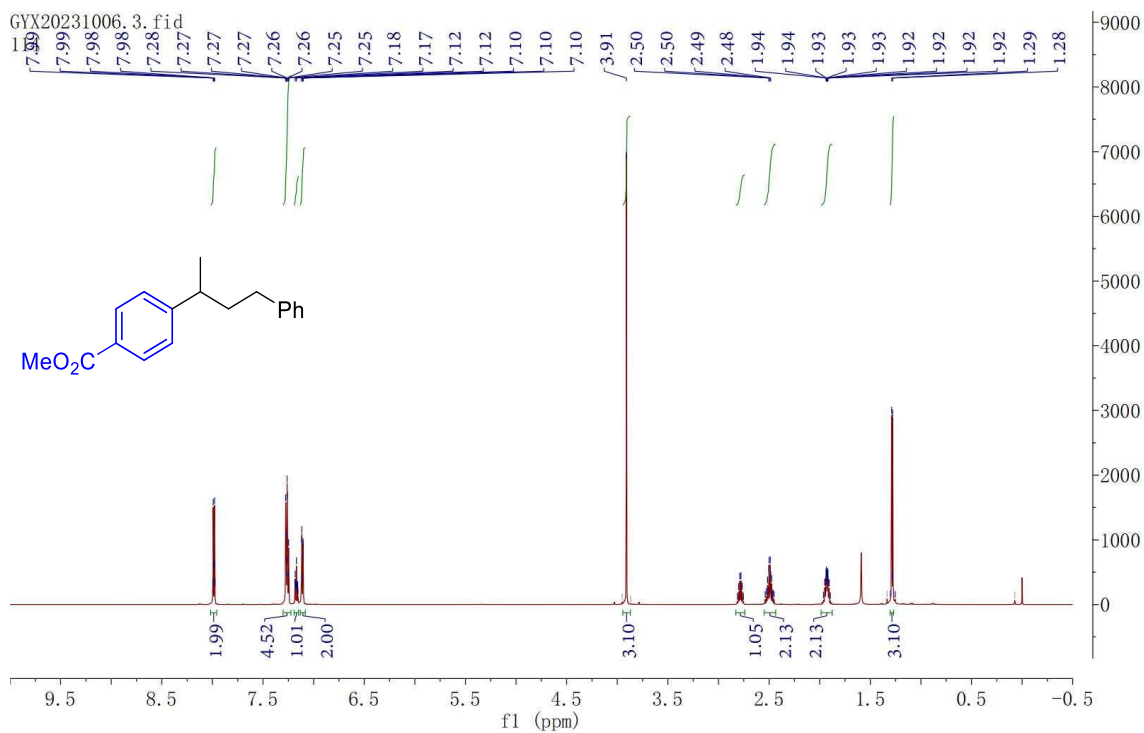

45, <sup>13</sup>C NMR (151 MHz, CDCl<sub>3</sub>)

GYX20231006.4.fid  
114

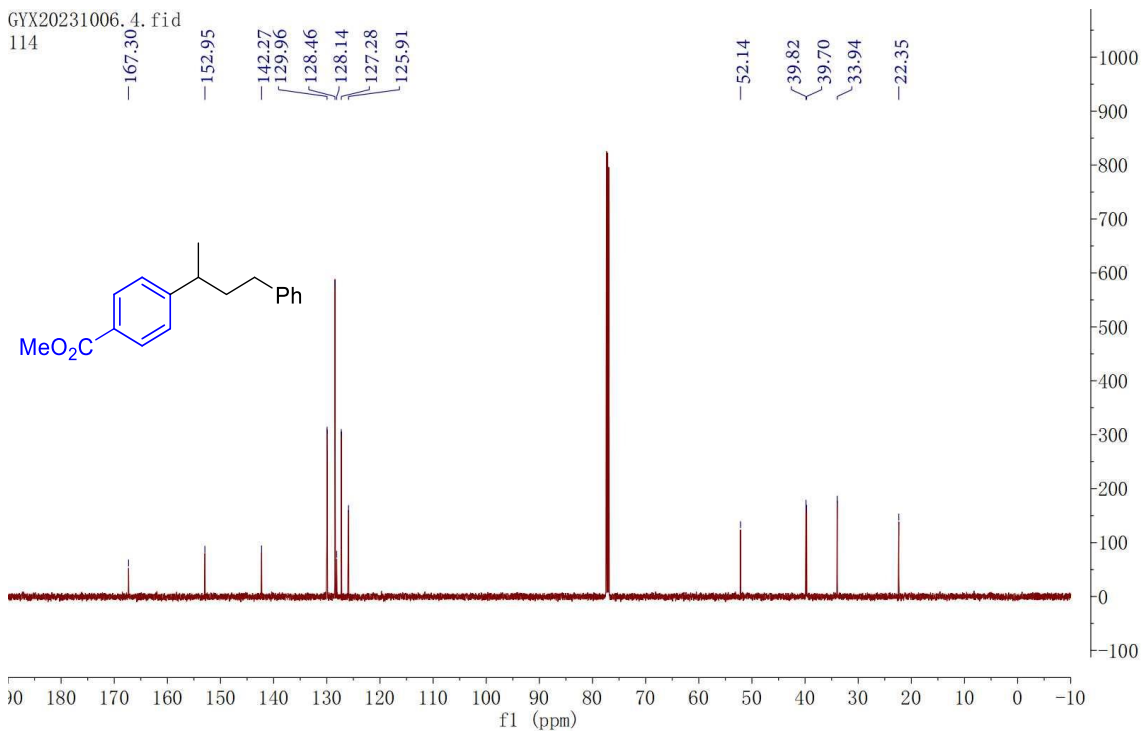

46, <sup>1</sup>H-NMR (600 MHz, CDCl<sub>3</sub>)

GHG20230711.6.fid  
46

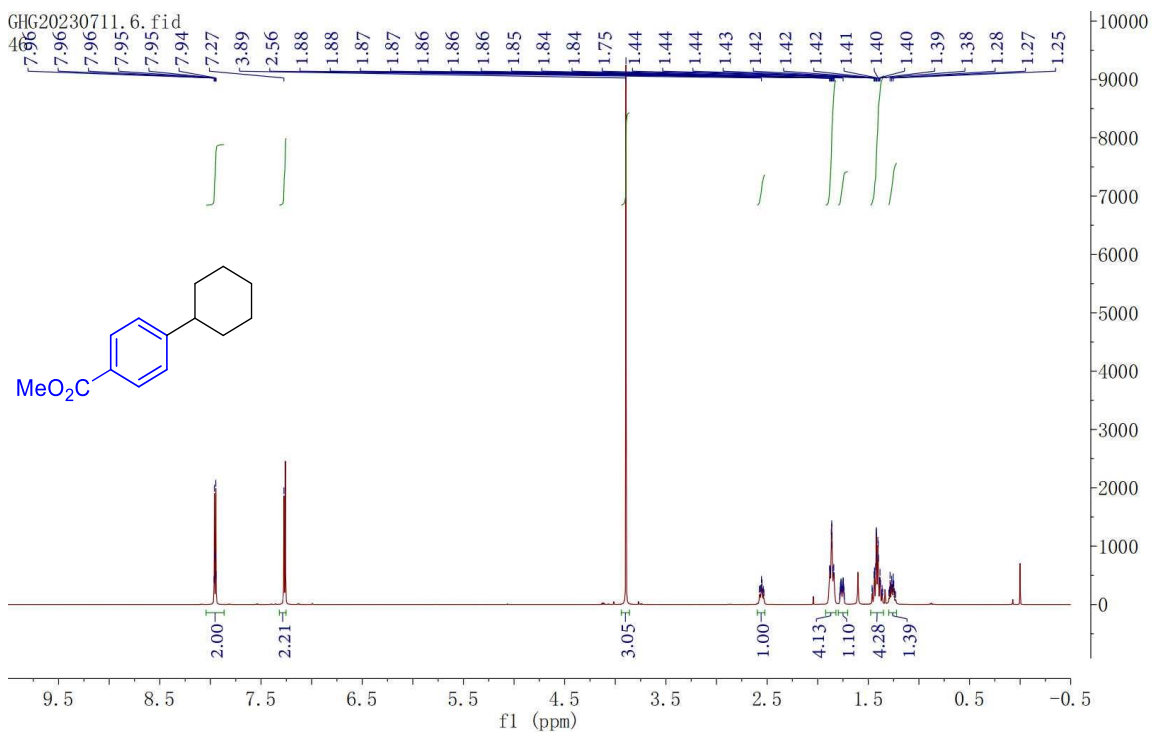

46, <sup>13</sup>C NMR (151 MHz, CDCl<sub>3</sub>)

SDL20230919\_28.fid  
49

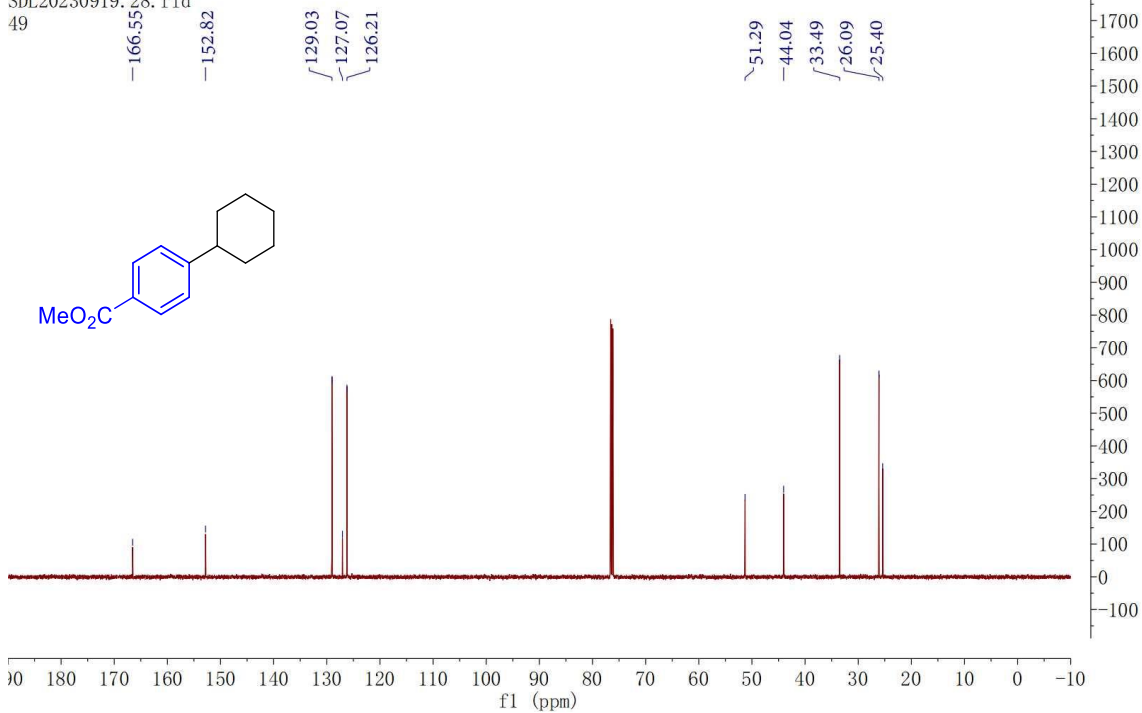

47, <sup>1</sup>H-NMR (600 MHz, CDCl<sub>3</sub>)

GHG20231020\_13.fid  
S15

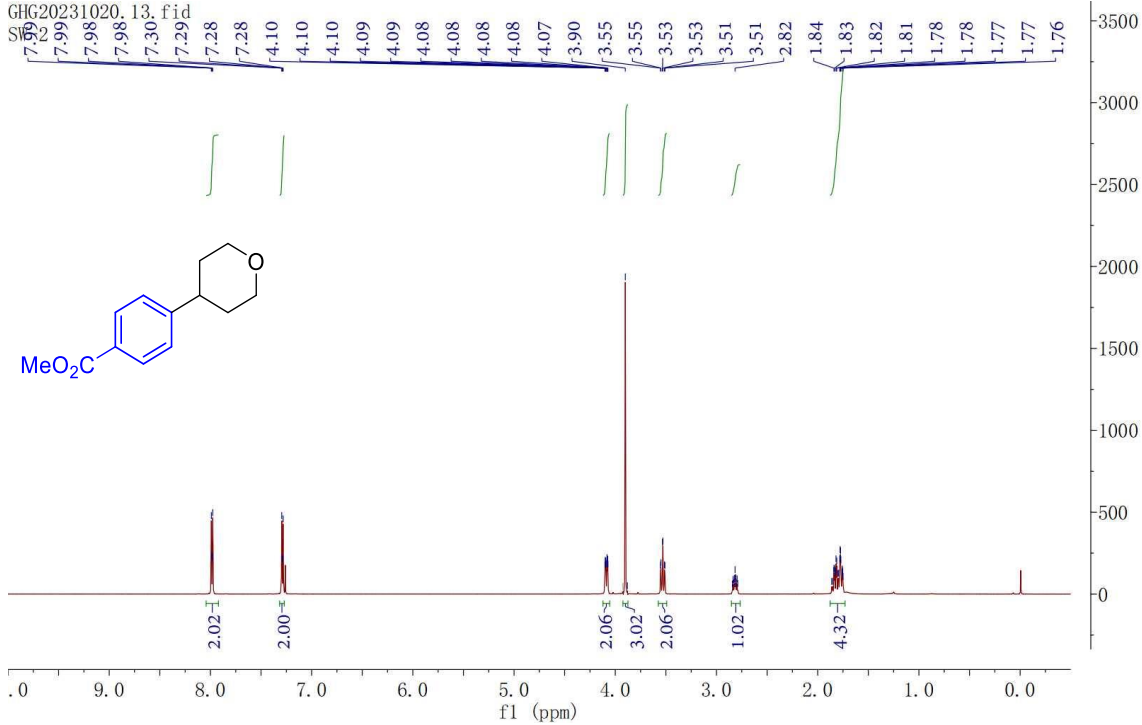

47, <sup>13</sup>C NMR (151 MHz, CDCl<sub>3</sub>)

SDL20230919\_34.fid  
SW-2

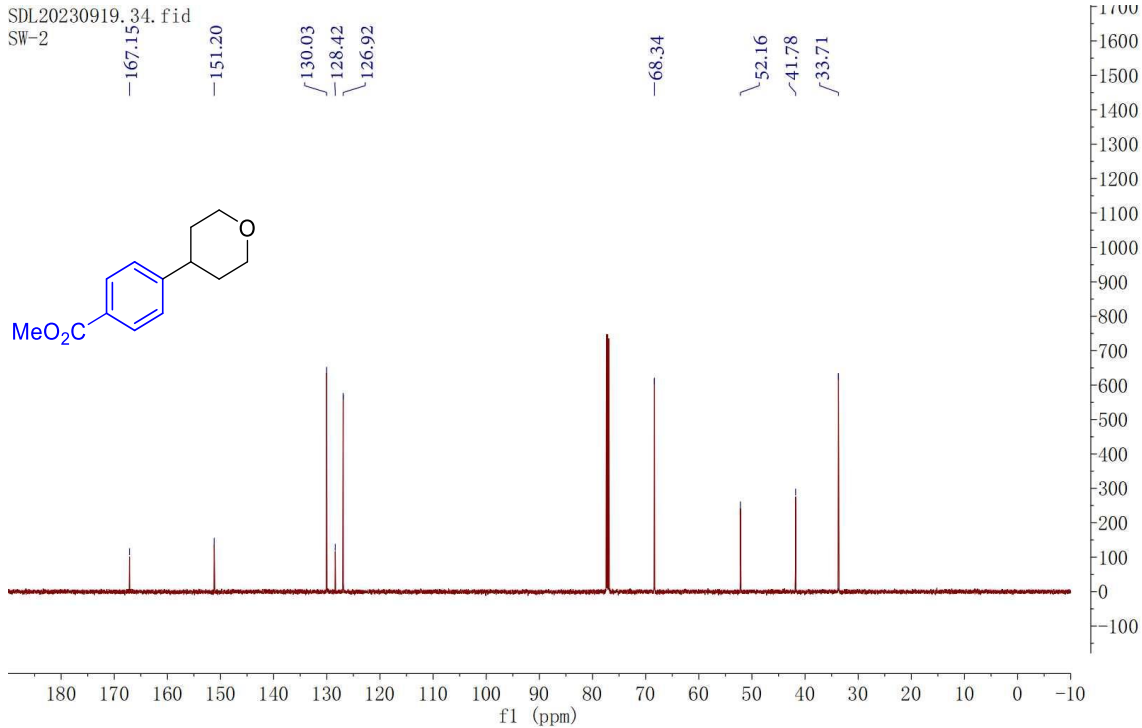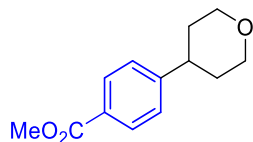

48, <sup>1</sup>H-NMR (600 MHz, CDCl<sub>3</sub>)

GHG20230313\_13.fid  
B-2

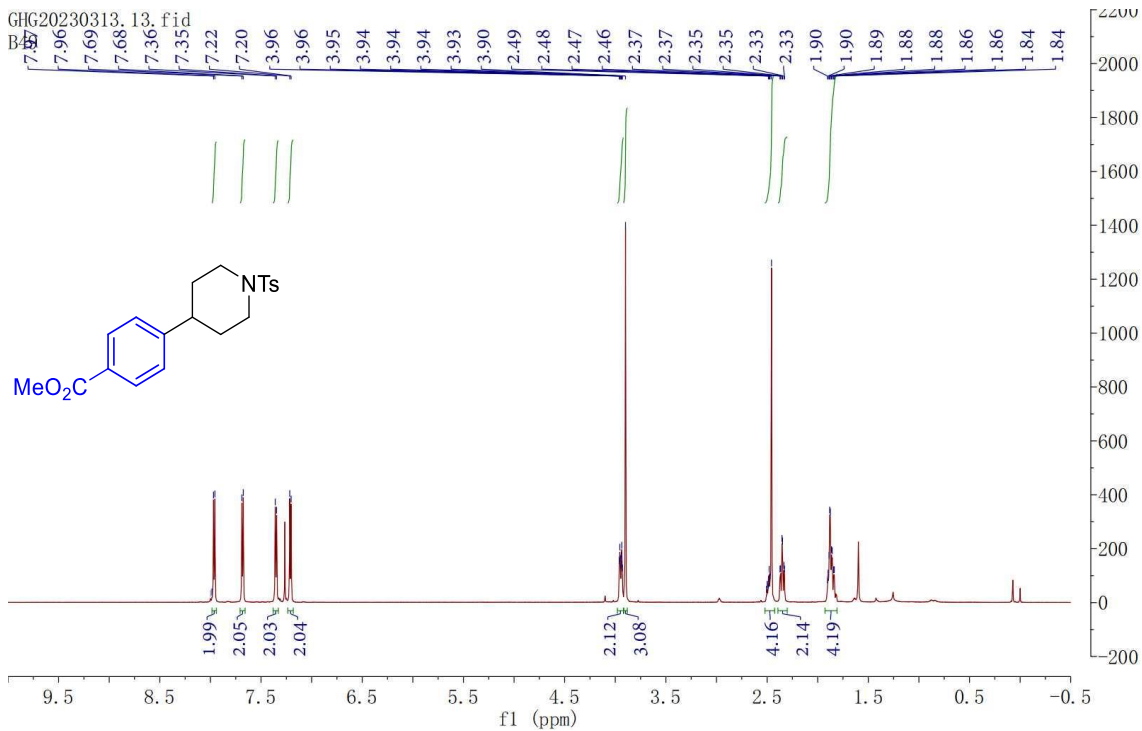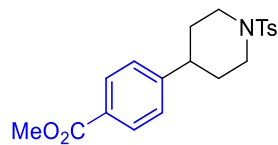



### 48, <sup>13</sup>C NMR (151 MHz, CDCl<sub>3</sub>)

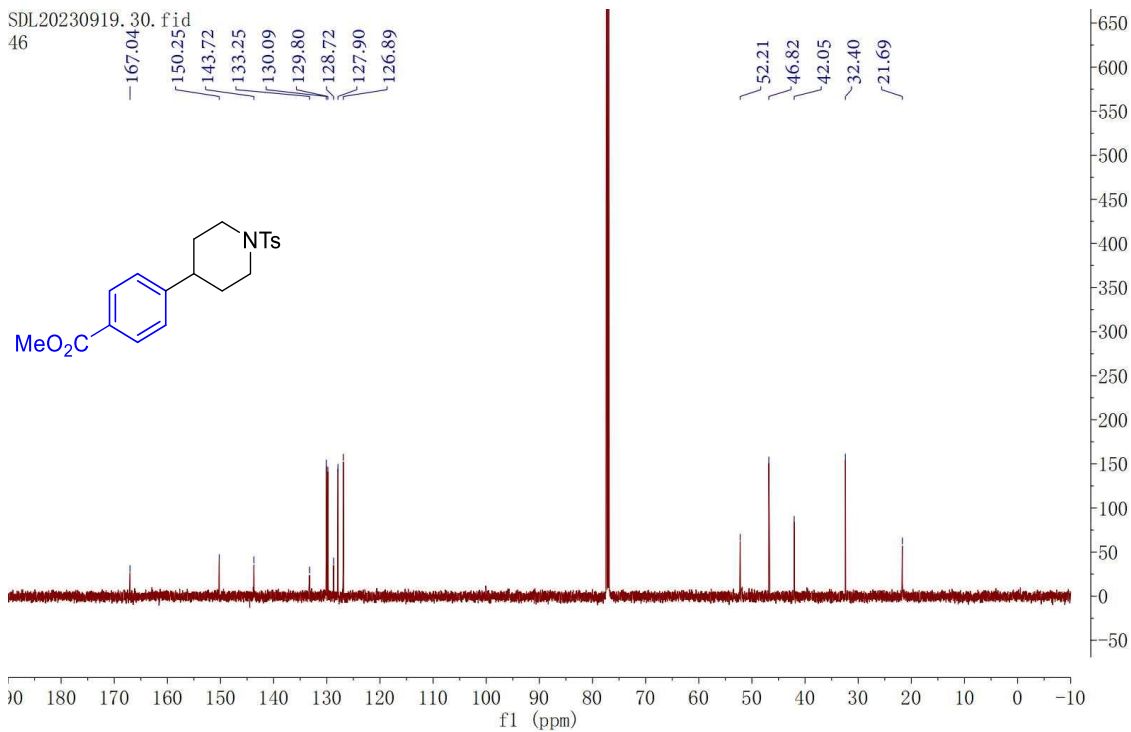

### 49, <sup>1</sup>H-NMR (600 MHz, CDCl<sub>3</sub>)

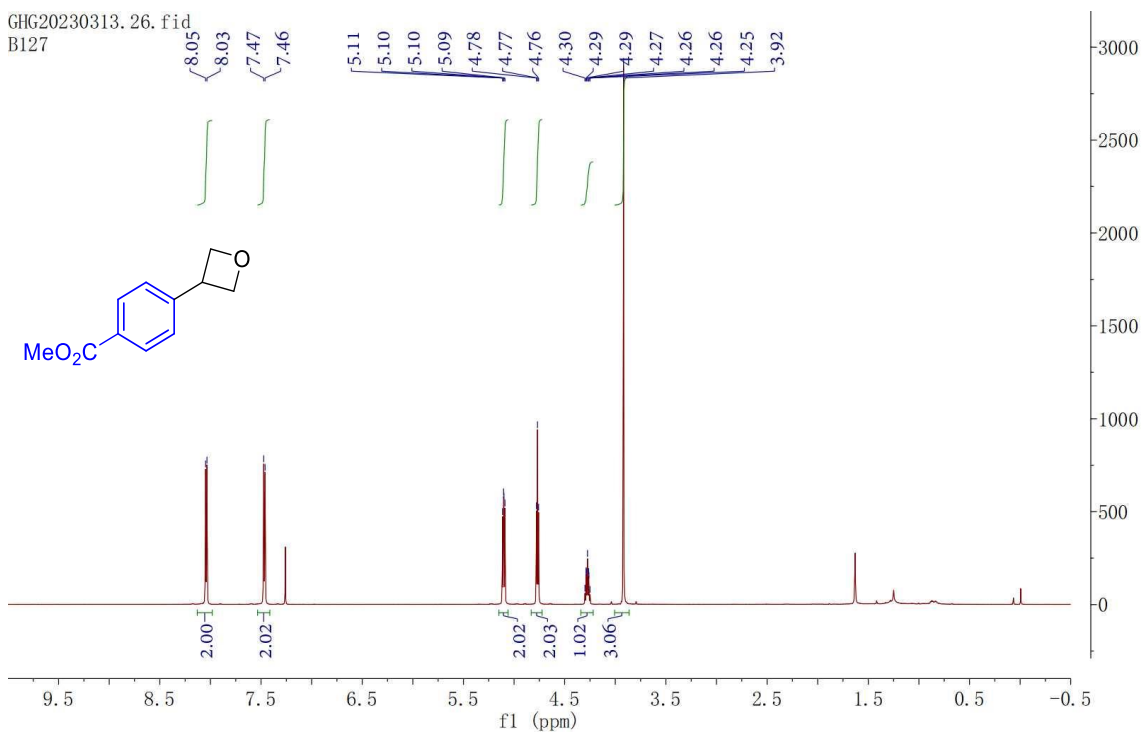

### 49, <sup>13</sup>C NMR (151 MHz, CDCl<sub>3</sub>)

SDL20230920\_20.fid  
127

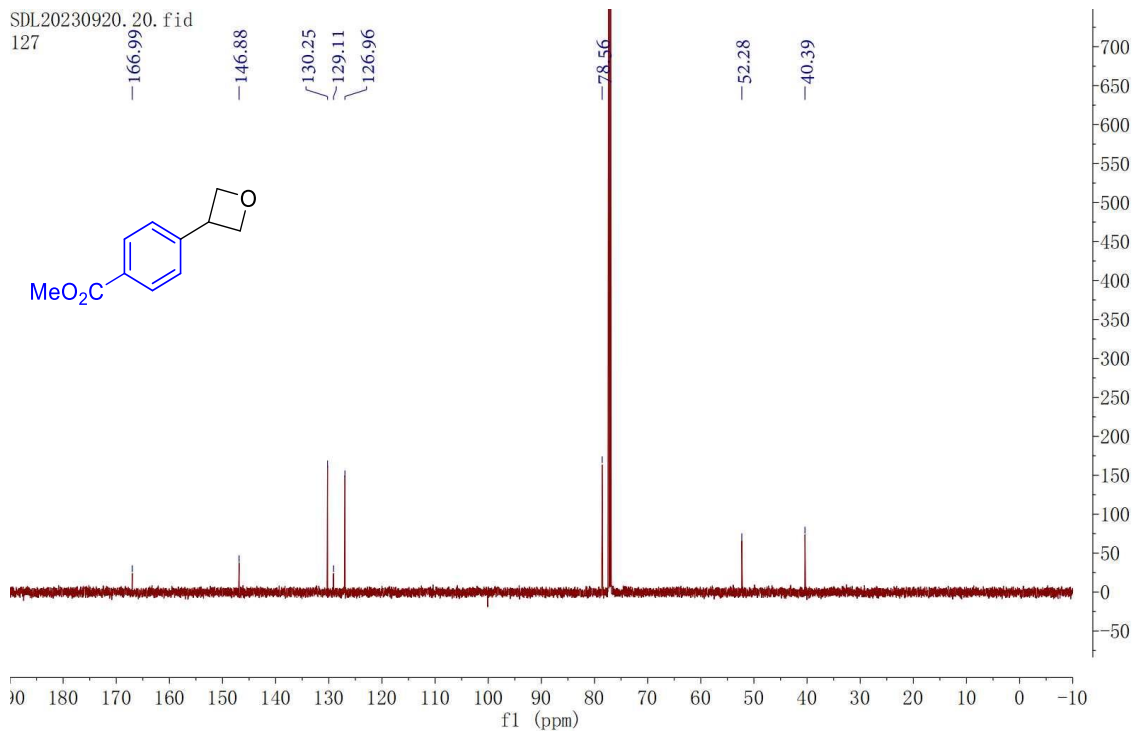

### 50, <sup>1</sup>H-NMR (600 MHz, CDCl<sub>3</sub>)

GYX20231006\_9.fid

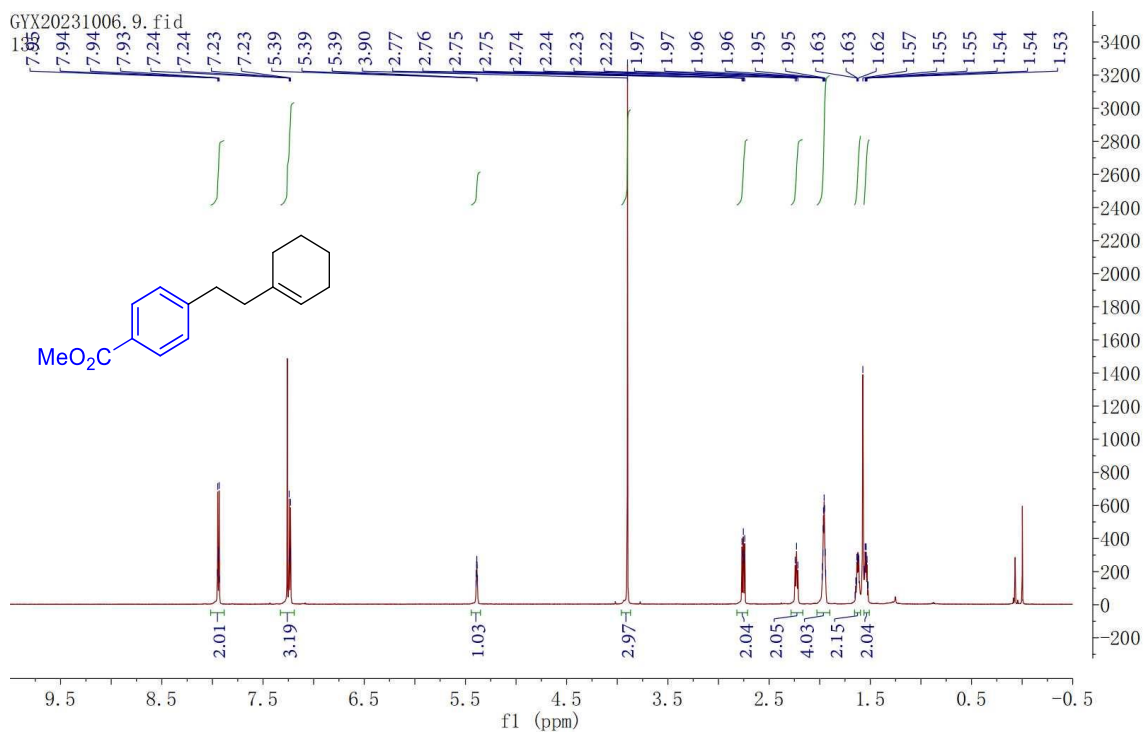

### 50, <sup>13</sup>C NMR (151 MHz, CDCl<sub>3</sub>)

GYX20231006.10.fid  
133

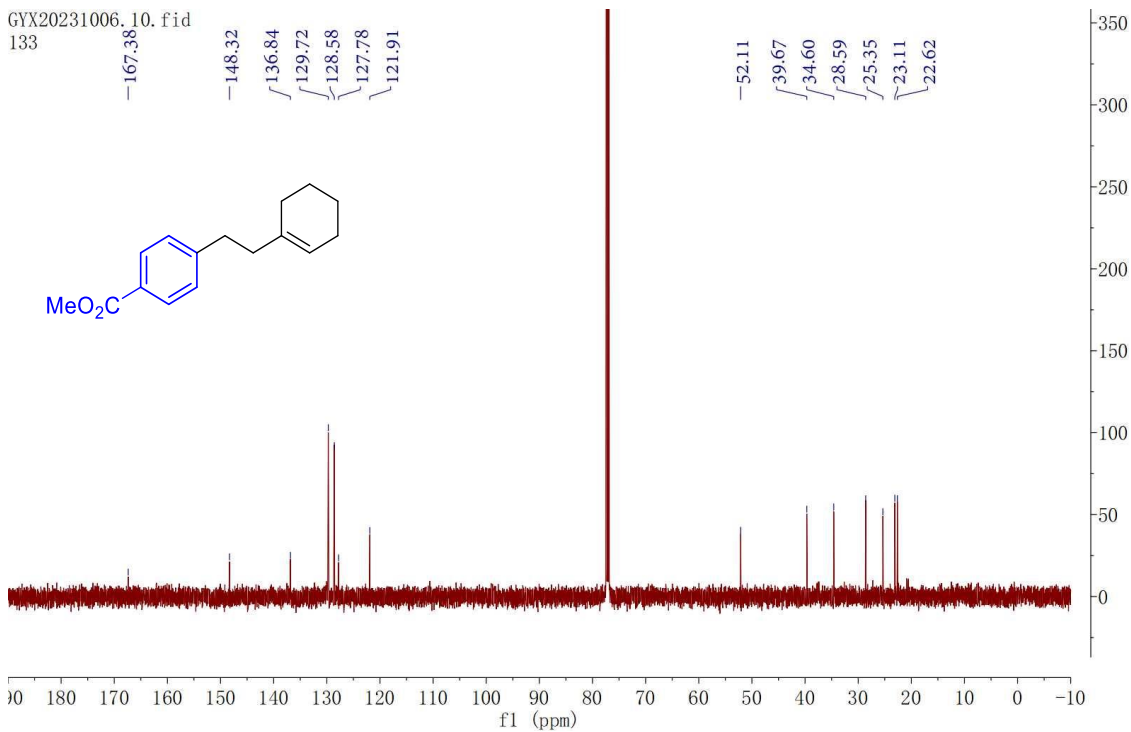

### 51, <sup>1</sup>H-NMR (600 MHz, CDCl<sub>3</sub>)

SDL20230920.17.fid  
135

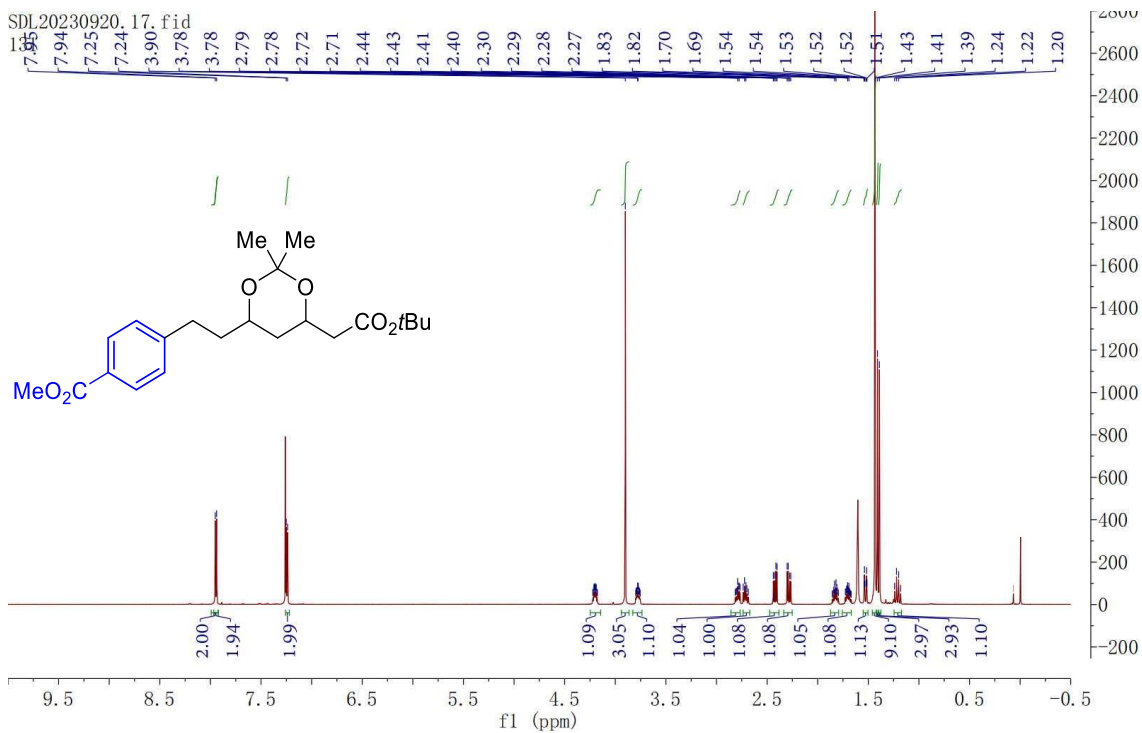

**51, <sup>13</sup>C NMR (151 MHz, CDCl<sub>3</sub>)**

SDL20230920.18.fid  
131

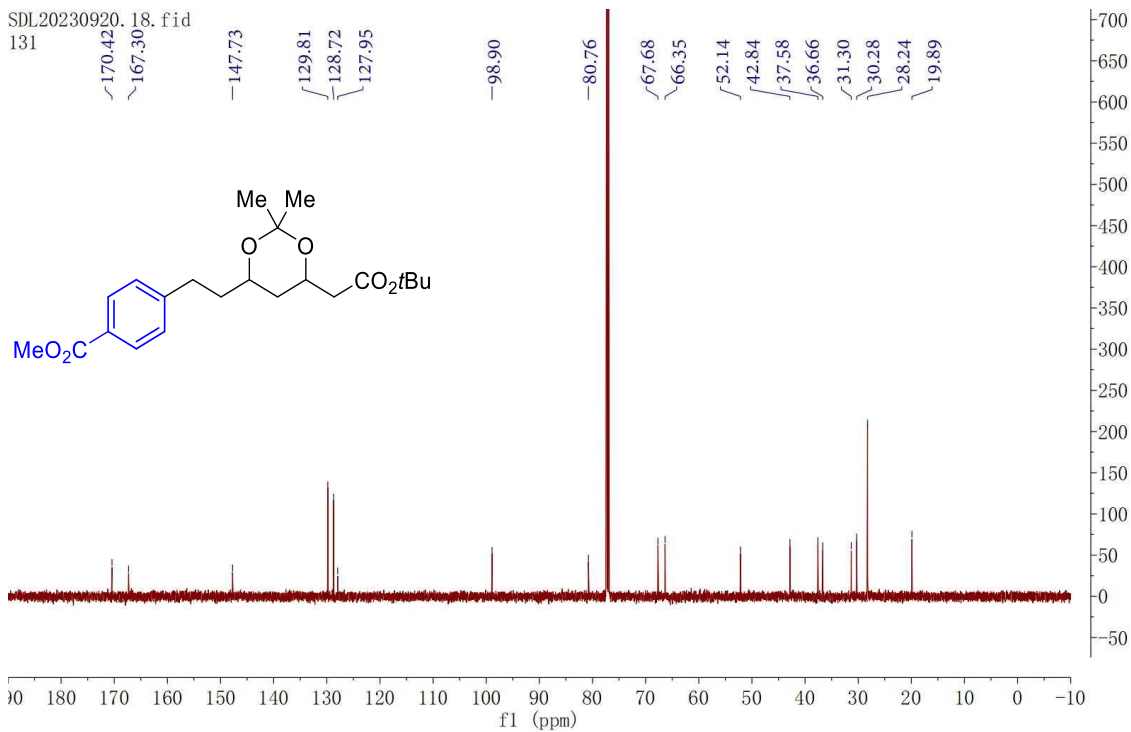

**52, <sup>1</sup>H-NMR (600 MHz, CDCl<sub>3</sub>)**

CHG20230713/5

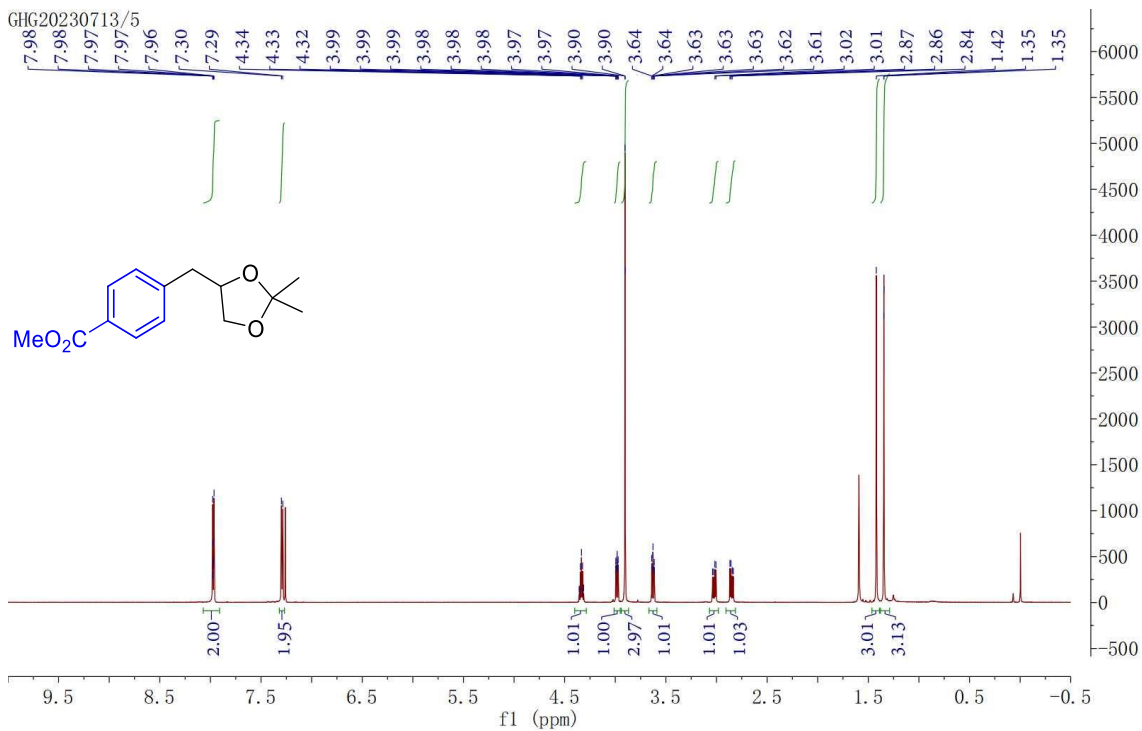

**52, <sup>13</sup>C NMR (151 MHz, CDCl<sub>3</sub>)**

SDL20230920\_40.fid  
161

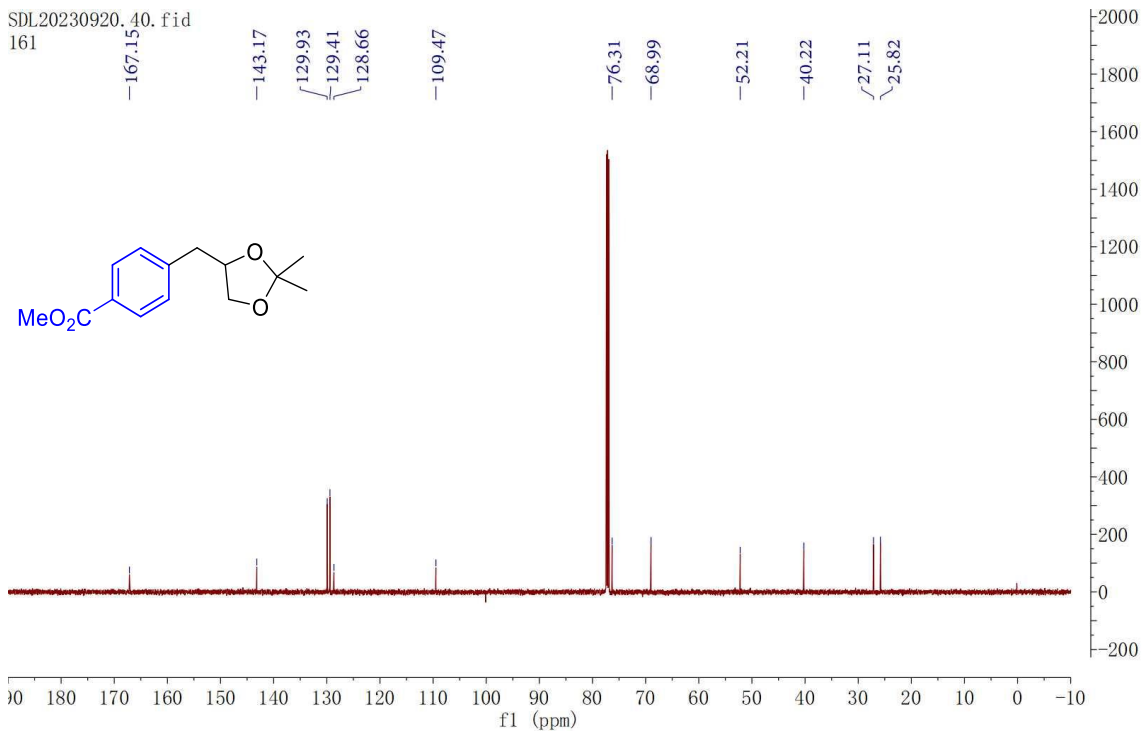

**53, <sup>1</sup>H-NMR (600 MHz, CDCl<sub>3</sub>)**

GHG20230713/7

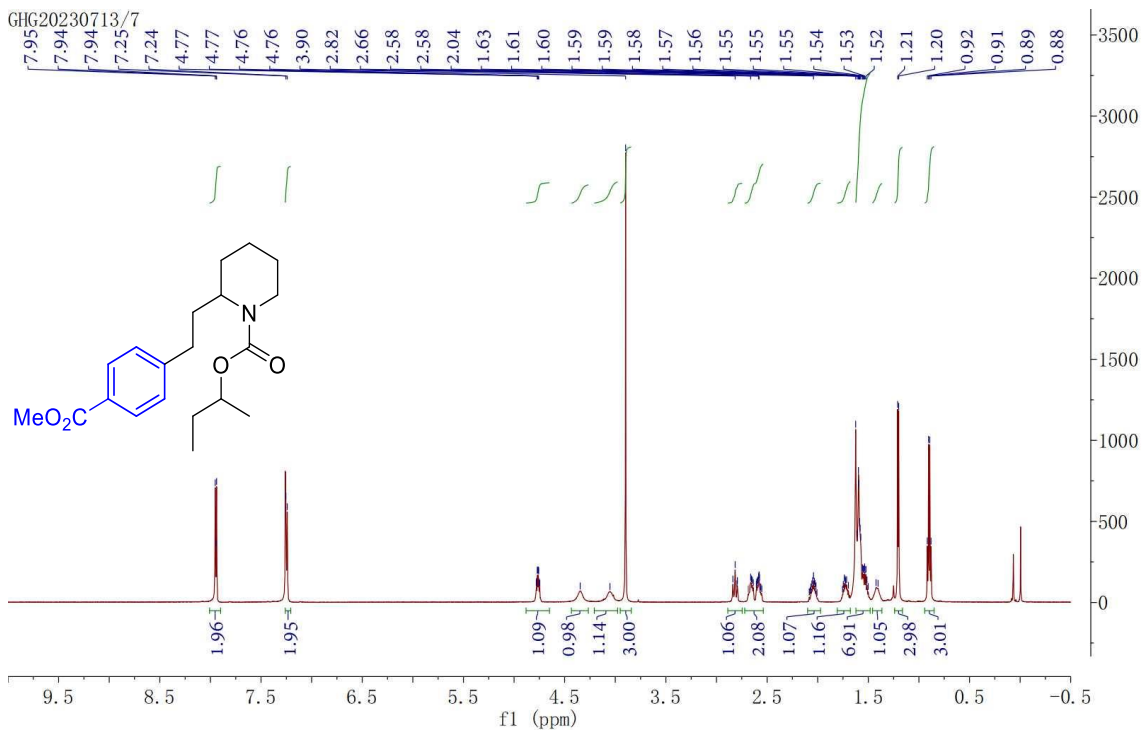

### 53, <sup>13</sup>C NMR (151 MHz, CDCl<sub>3</sub>)

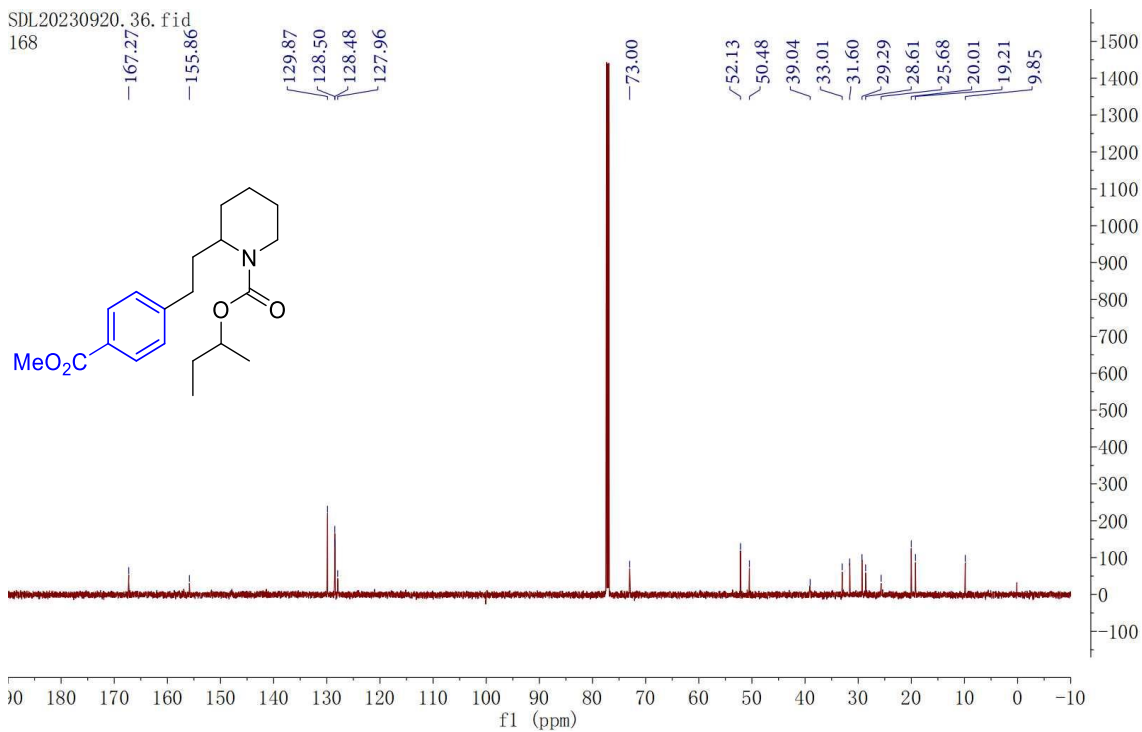

### 54, <sup>1</sup>H-NMR (600 MHz, CDCl<sub>3</sub>)

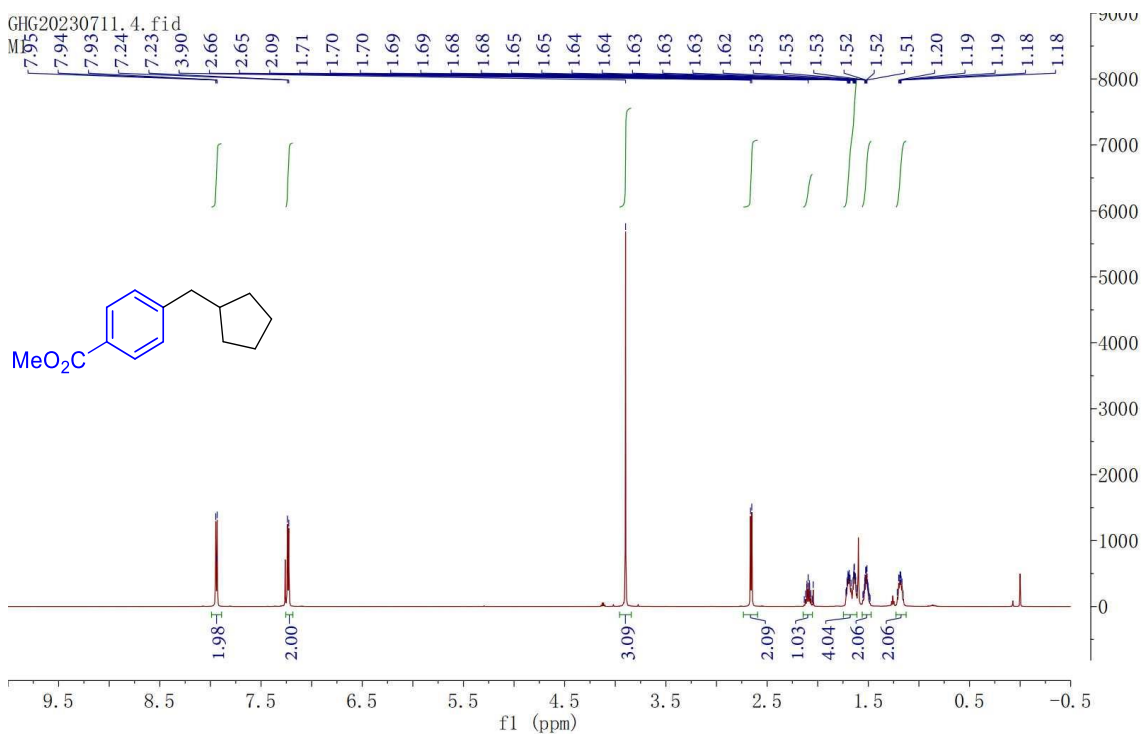

54, <sup>13</sup>C NMR (151 MHz, CDCl<sub>3</sub>)

SDL20230920\_42.fid  
M1

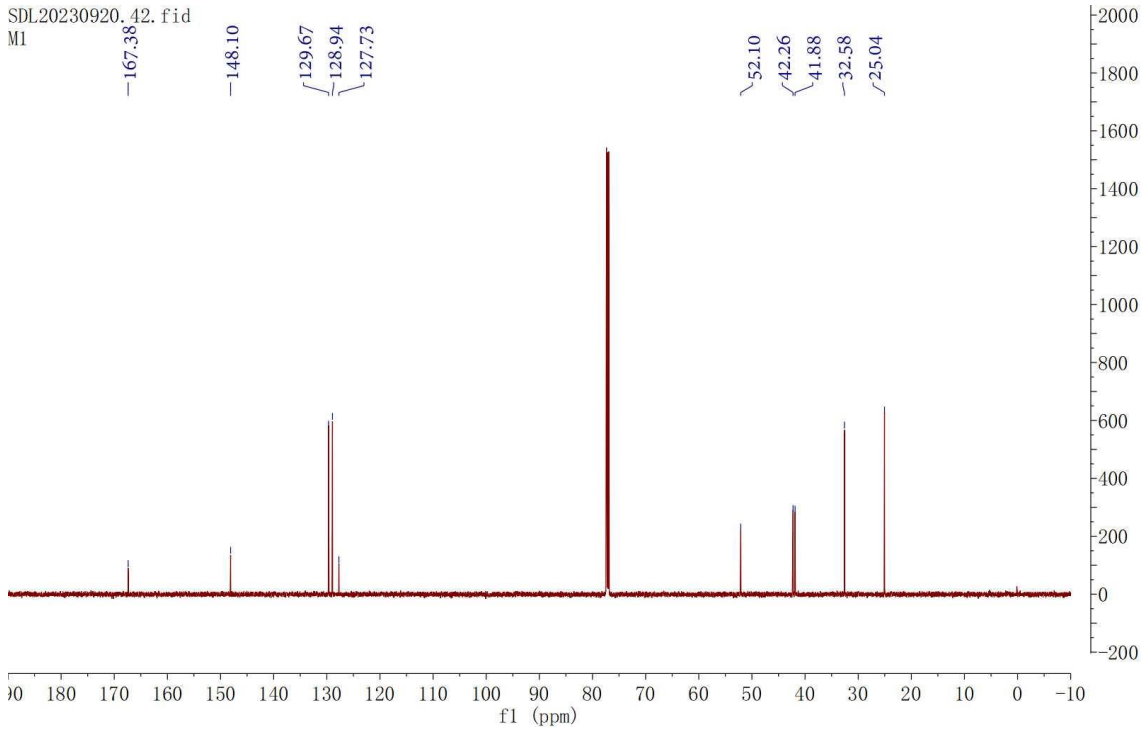

55, <sup>1</sup>H-NMR (600 MHz, CDCl<sub>3</sub>)

GHG20230713/8

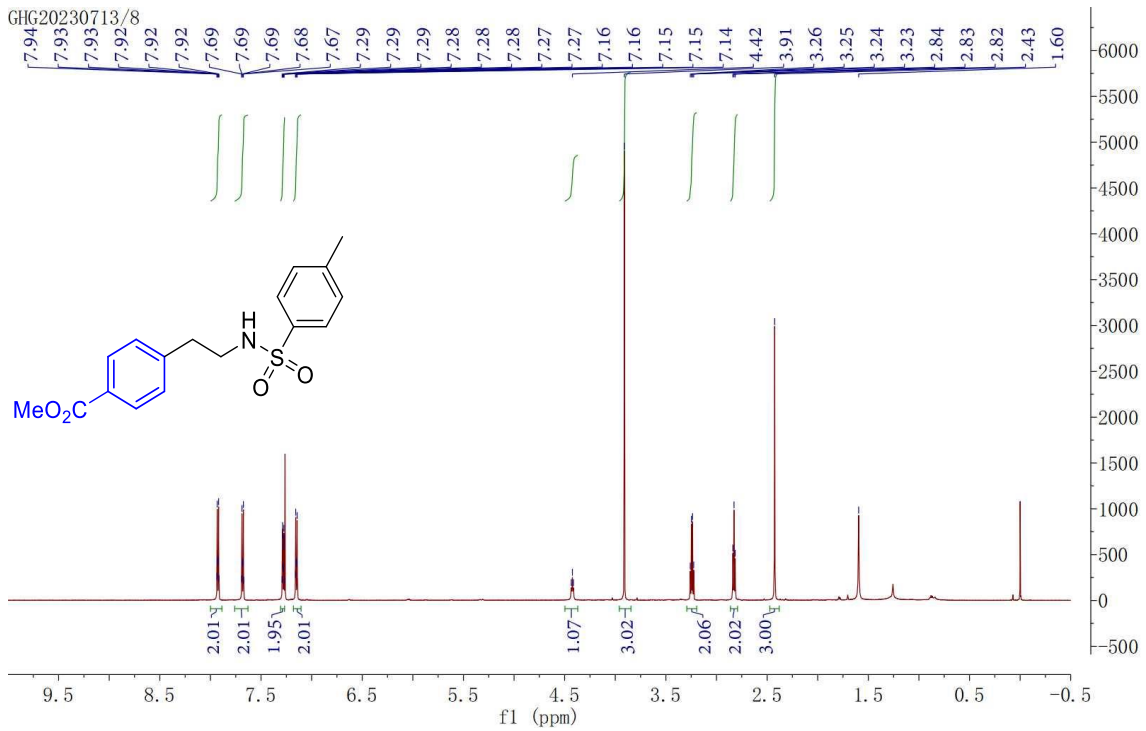

### 56, <sup>1</sup>H-NMR (600 MHz, CDCl<sub>3</sub>)

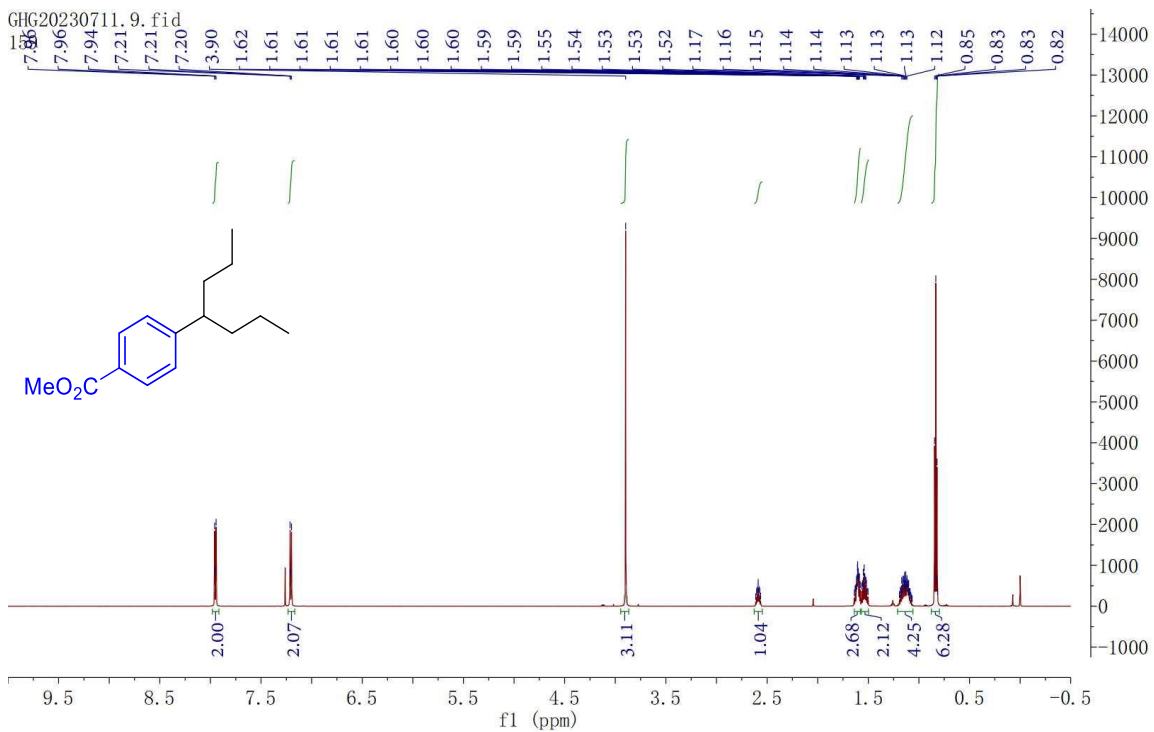

### 56, <sup>13</sup>C NMR (151 MHz, CDCl<sub>3</sub>)

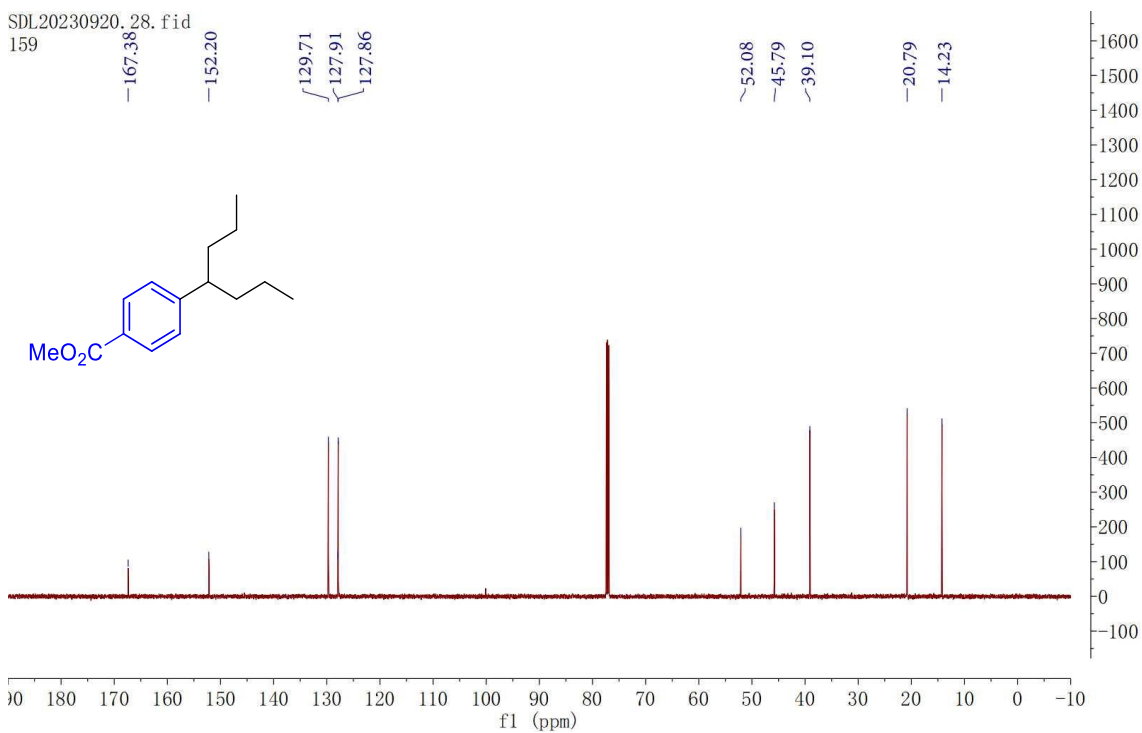



### 57, <sup>1</sup>H-NMR (600 MHz, CDCl<sub>3</sub>)

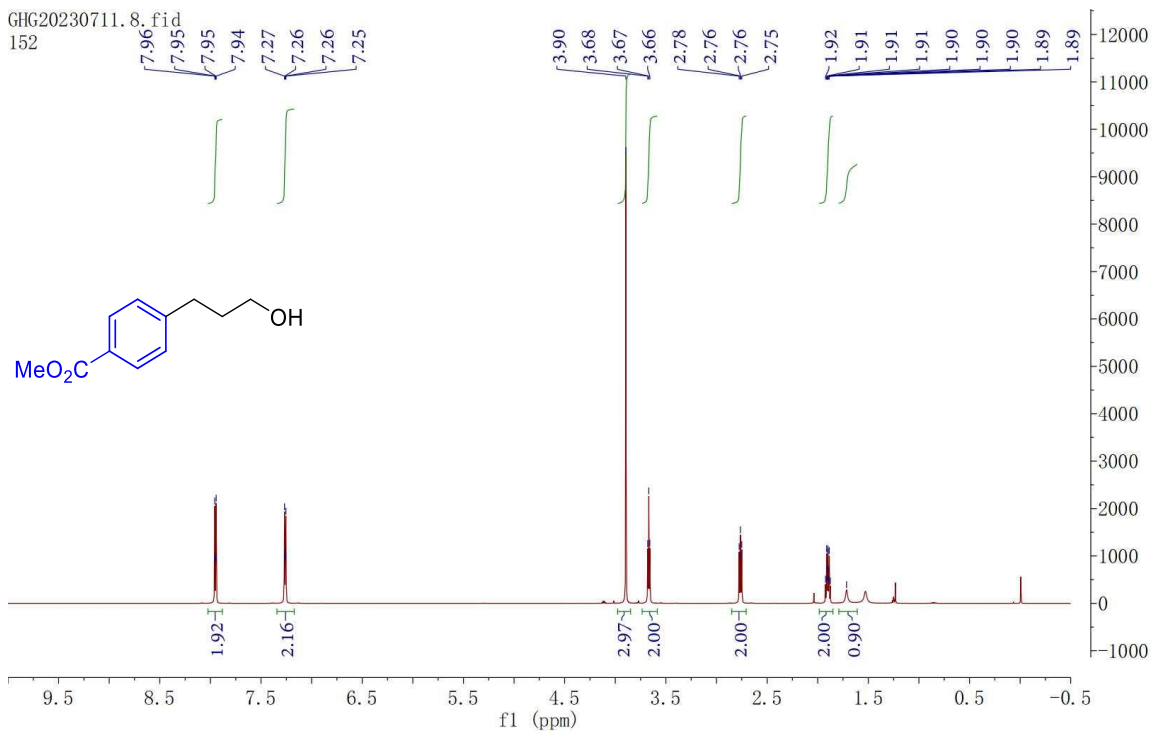

### 57, <sup>13</sup>C NMR (151 MHz, CDCl<sub>3</sub>)

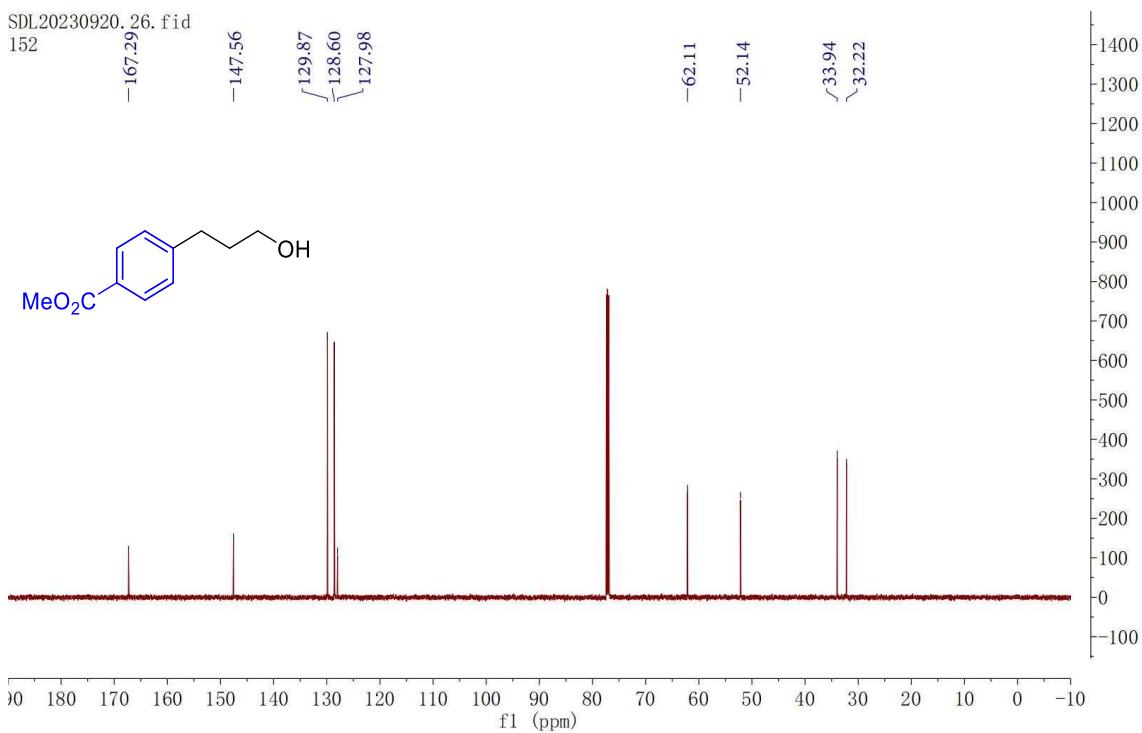

### 58, <sup>1</sup>H-NMR (600 MHz, CDCl<sub>3</sub>)

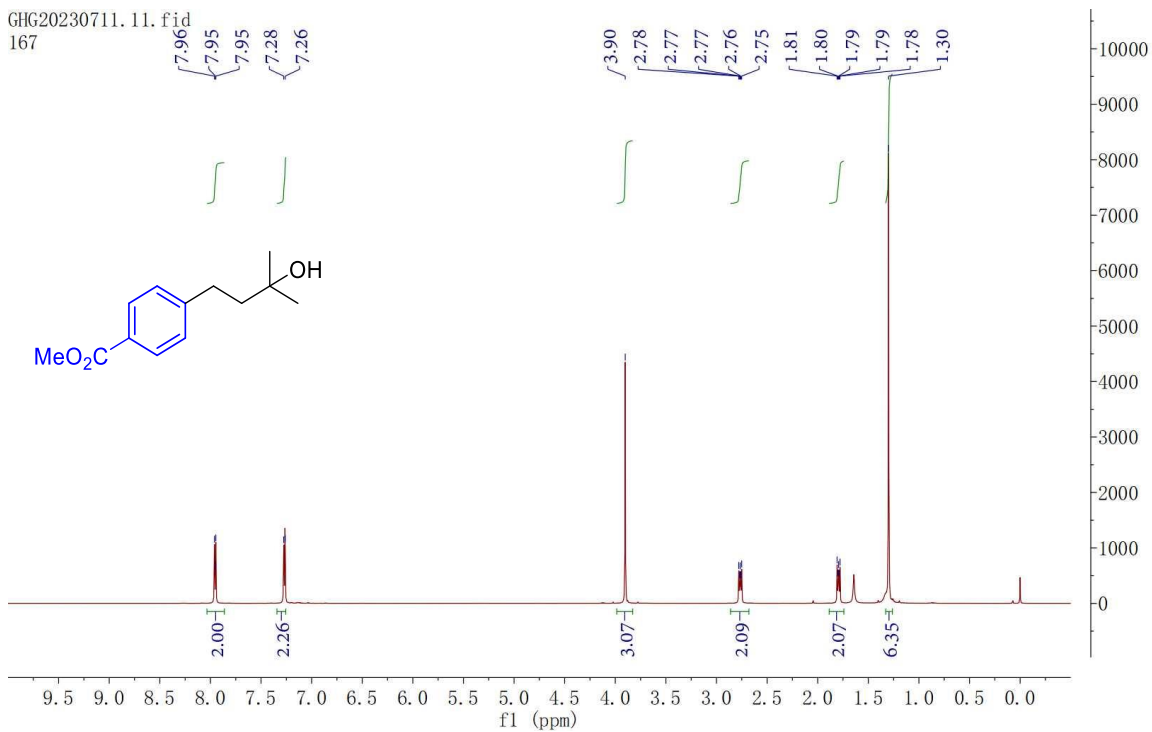

### 58, <sup>13</sup>C NMR (151 MHz, CDCl<sub>3</sub>)

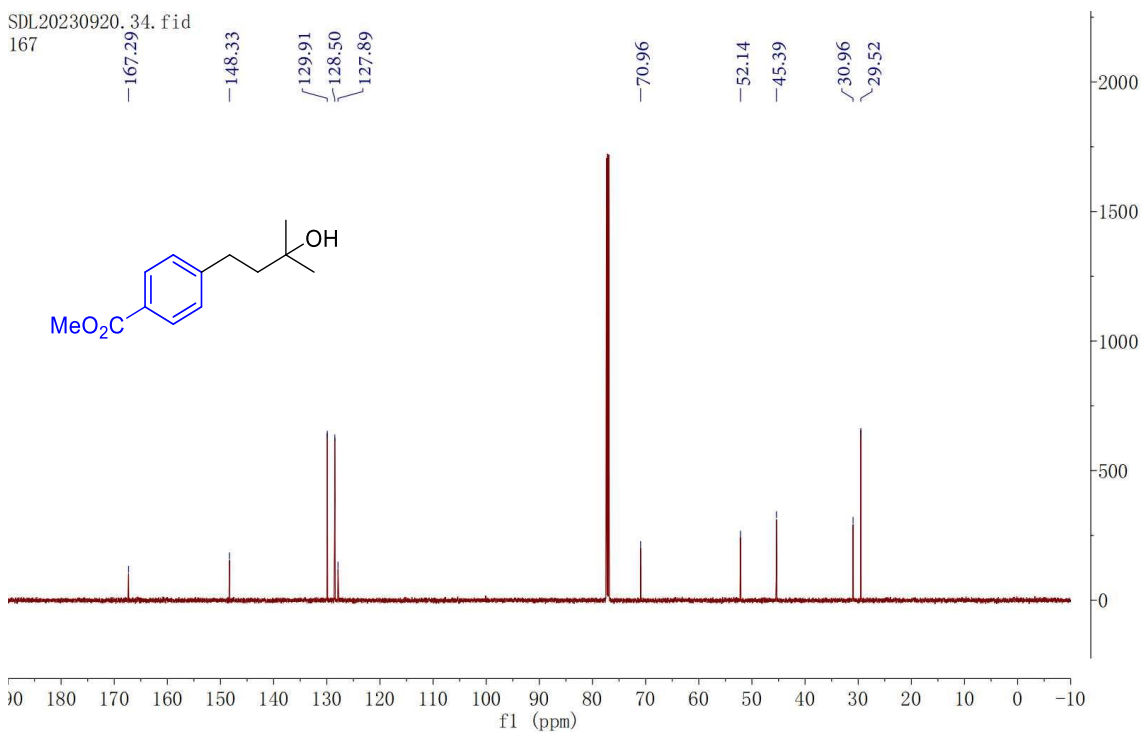

### 59, <sup>1</sup>H-NMR (600 MHz, CDCl<sub>3</sub>)

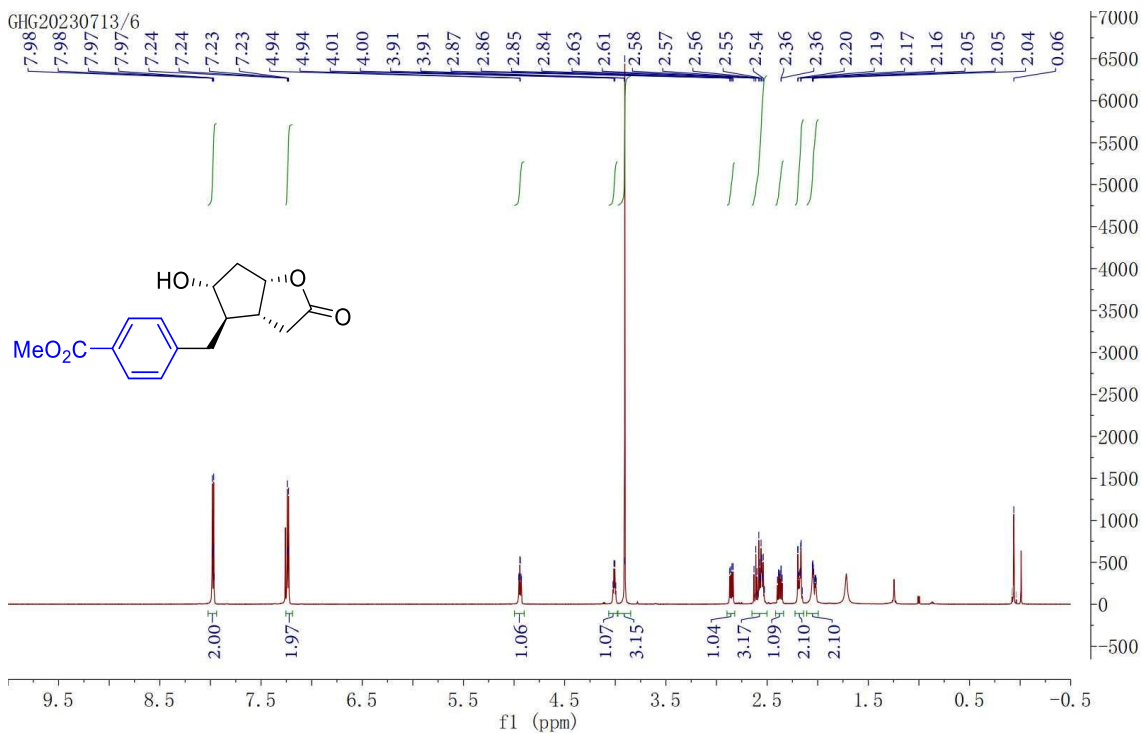

### 59, <sup>13</sup>C NMR (151 MHz, CDCl<sub>3</sub>)

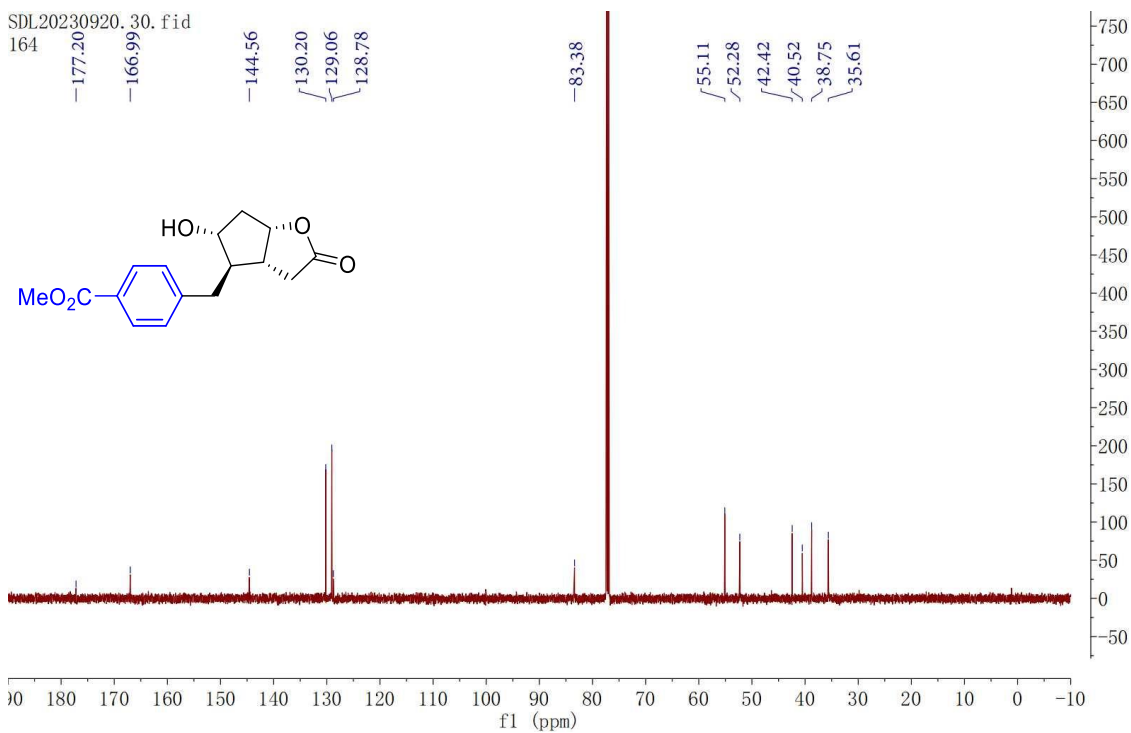

### 60, <sup>1</sup>H-NMR (600 MHz, CDCl<sub>3</sub>)

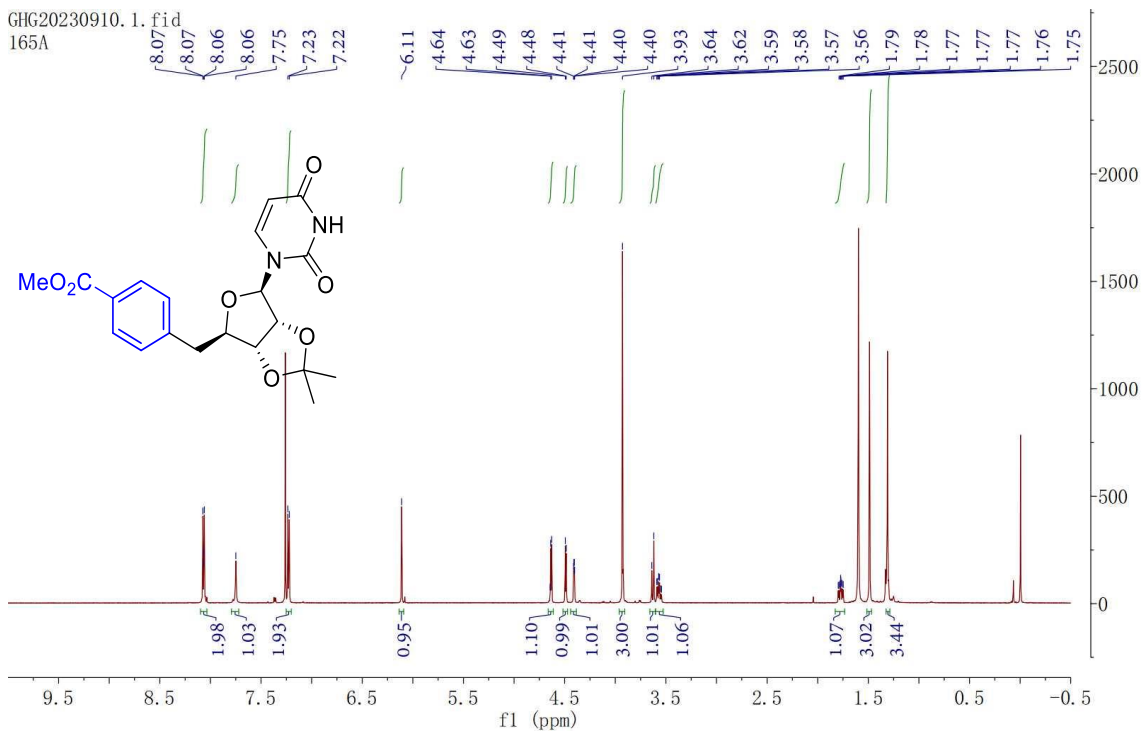

### 60, <sup>13</sup>C NMR (151 MHz, CDCl<sub>3</sub>)

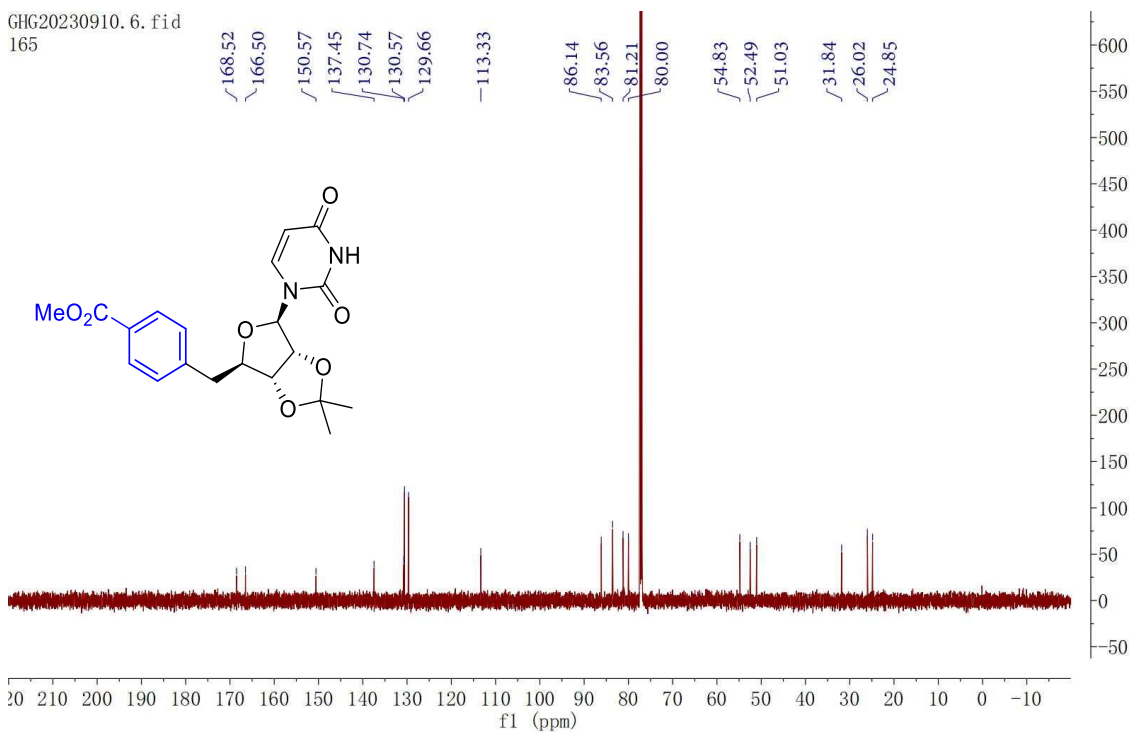

**61, <sup>1</sup>H-NMR (600 MHz, CDCl<sub>3</sub>)**

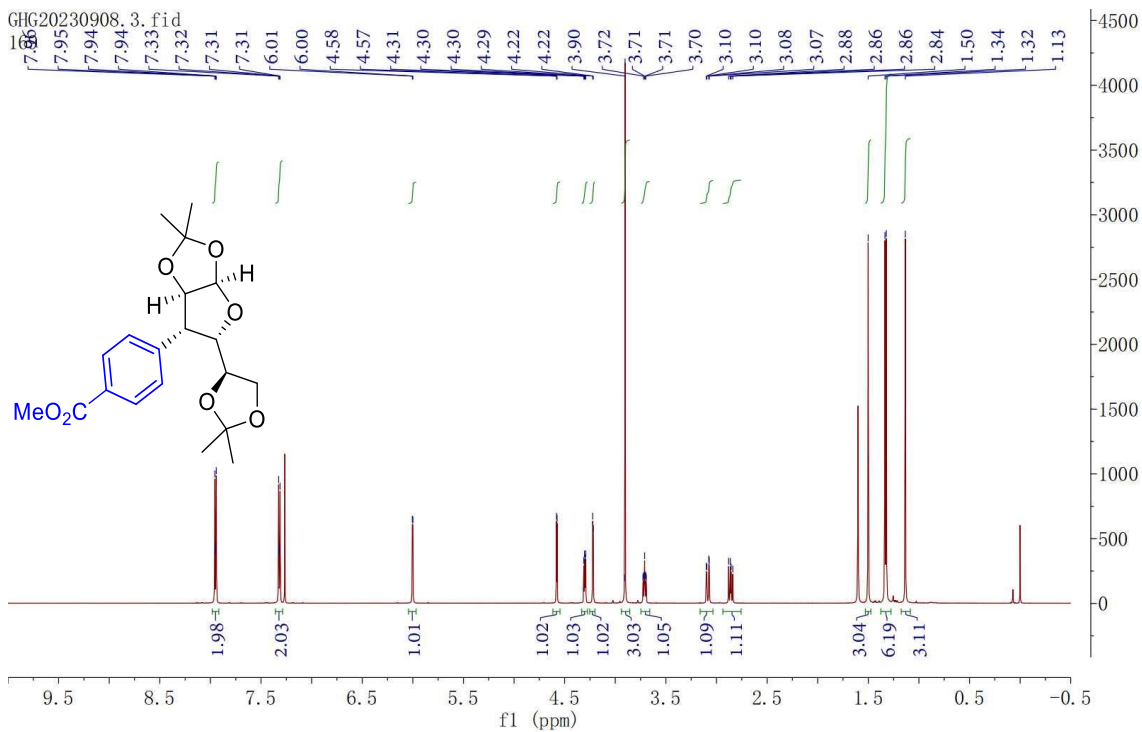

**61, <sup>13</sup>C NMR (151 MHz, CDCl<sub>3</sub>)**

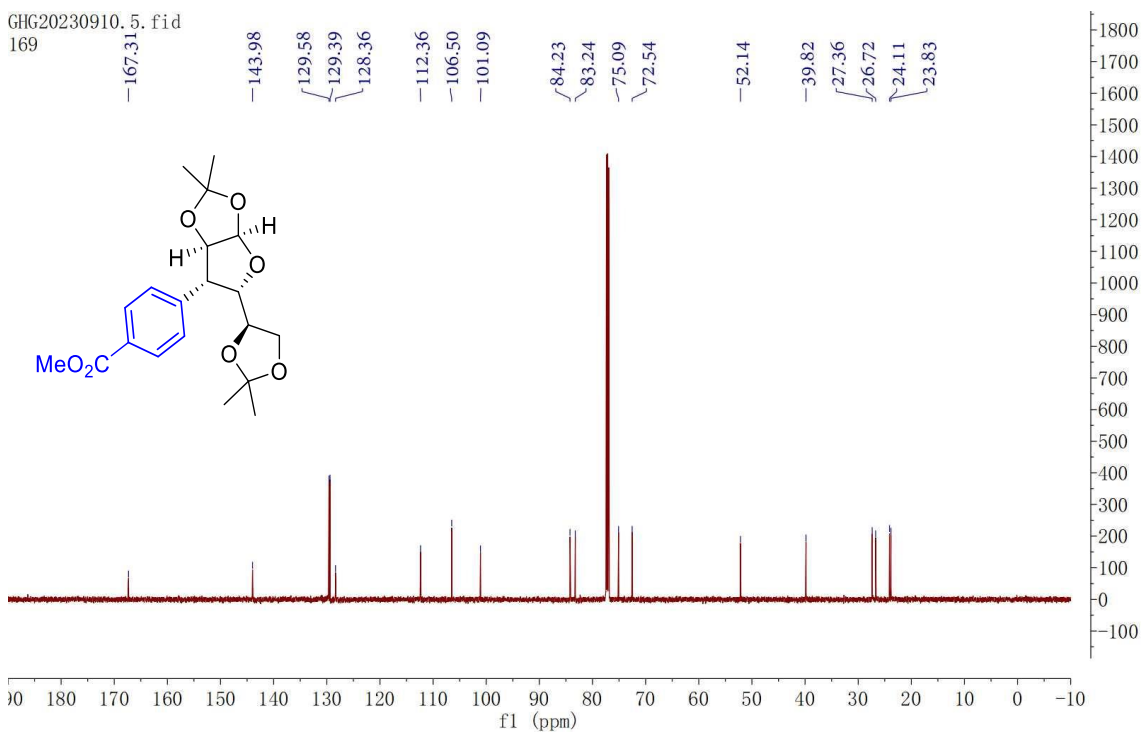

**1c, <sup>1</sup>H-NMR (600 MHz, CDCl<sub>3</sub>)**

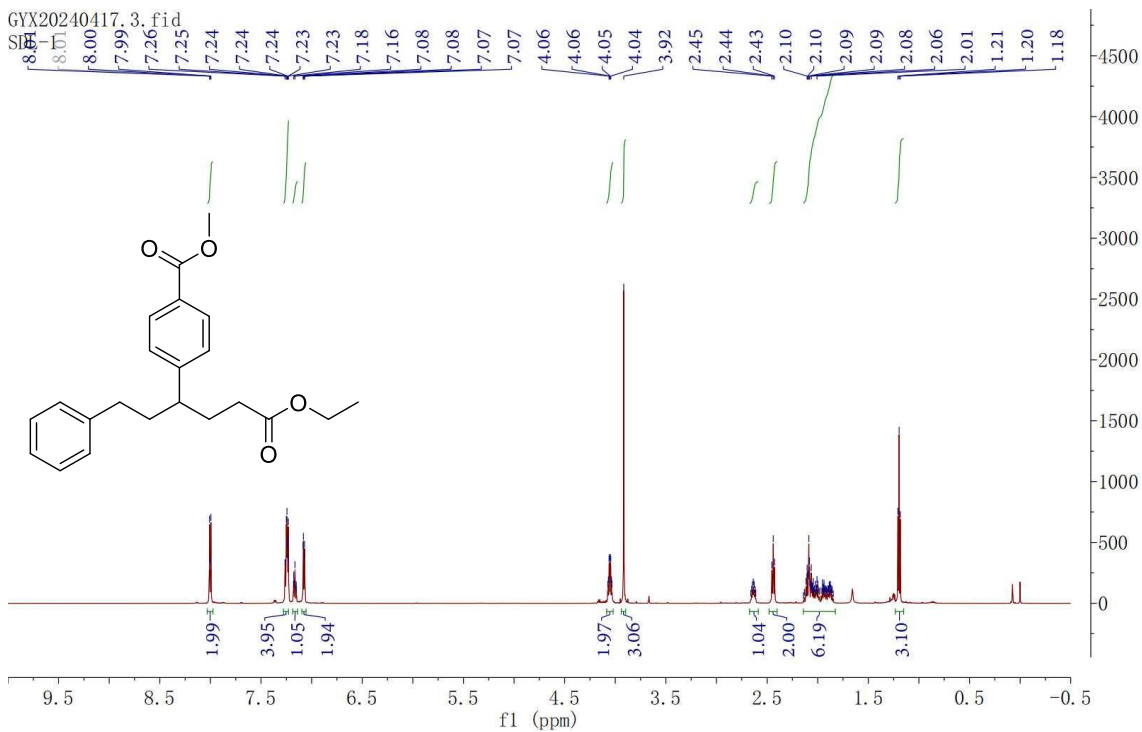

**1c, <sup>13</sup>C NMR (151 MHz, CDCl<sub>3</sub>)**

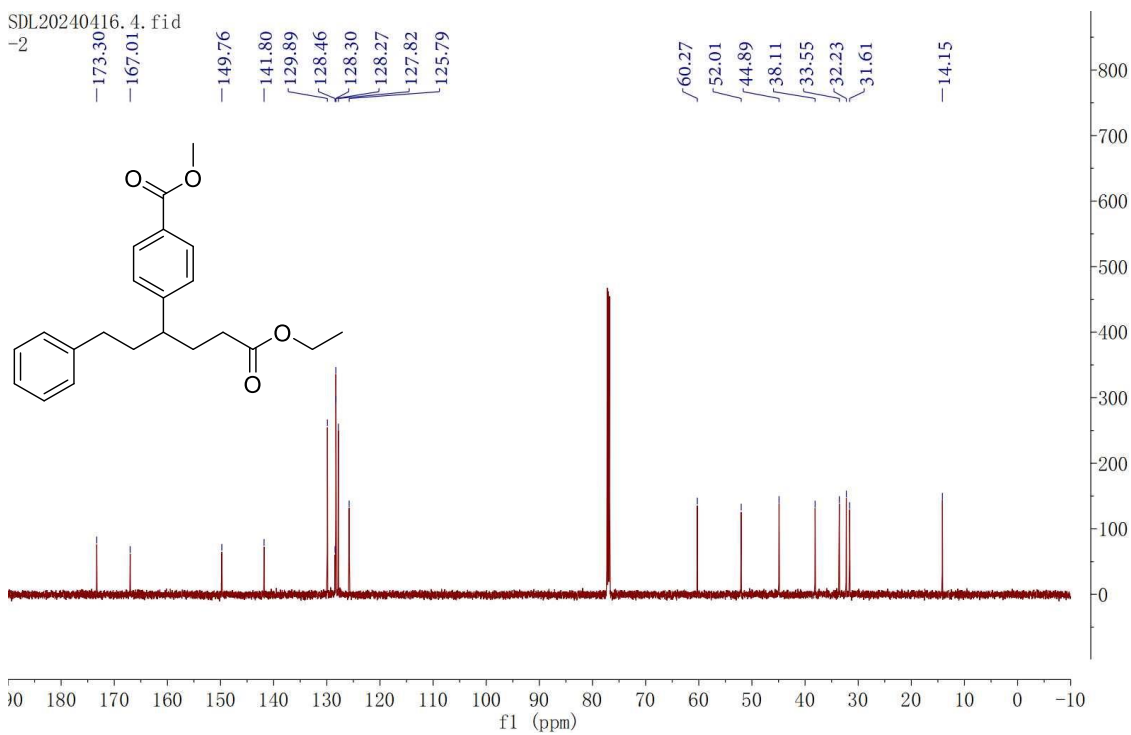

### 64, <sup>1</sup>H-NMR (600 MHz, CDCl<sub>3</sub>)

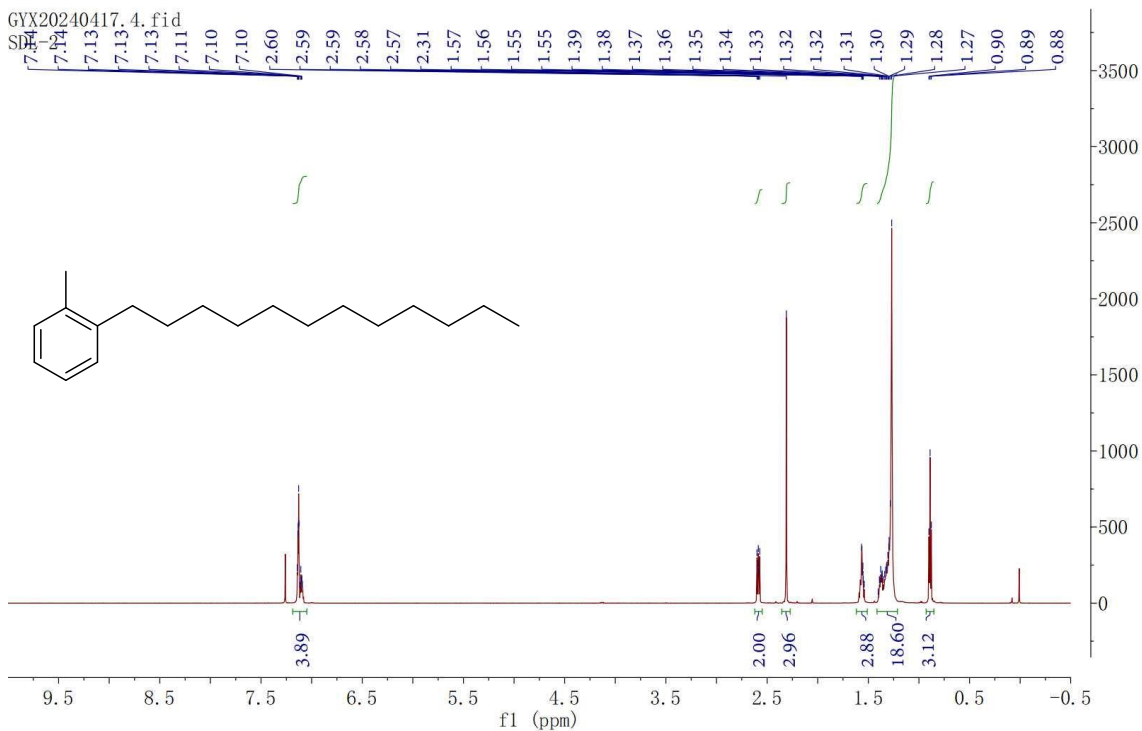

### 64, <sup>13</sup>C NMR (151 MHz, CDCl<sub>3</sub>)

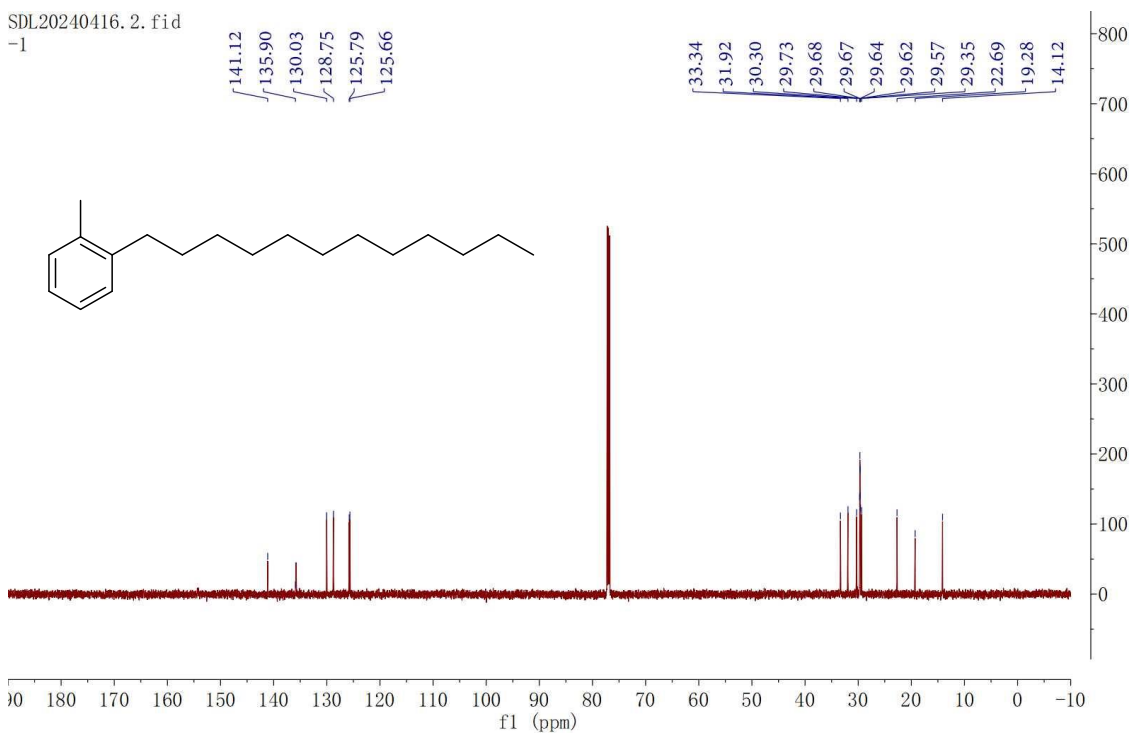

Full spectrum of Figure S1-a, <sup>1</sup>H-NMR (400 MHz, DMA)

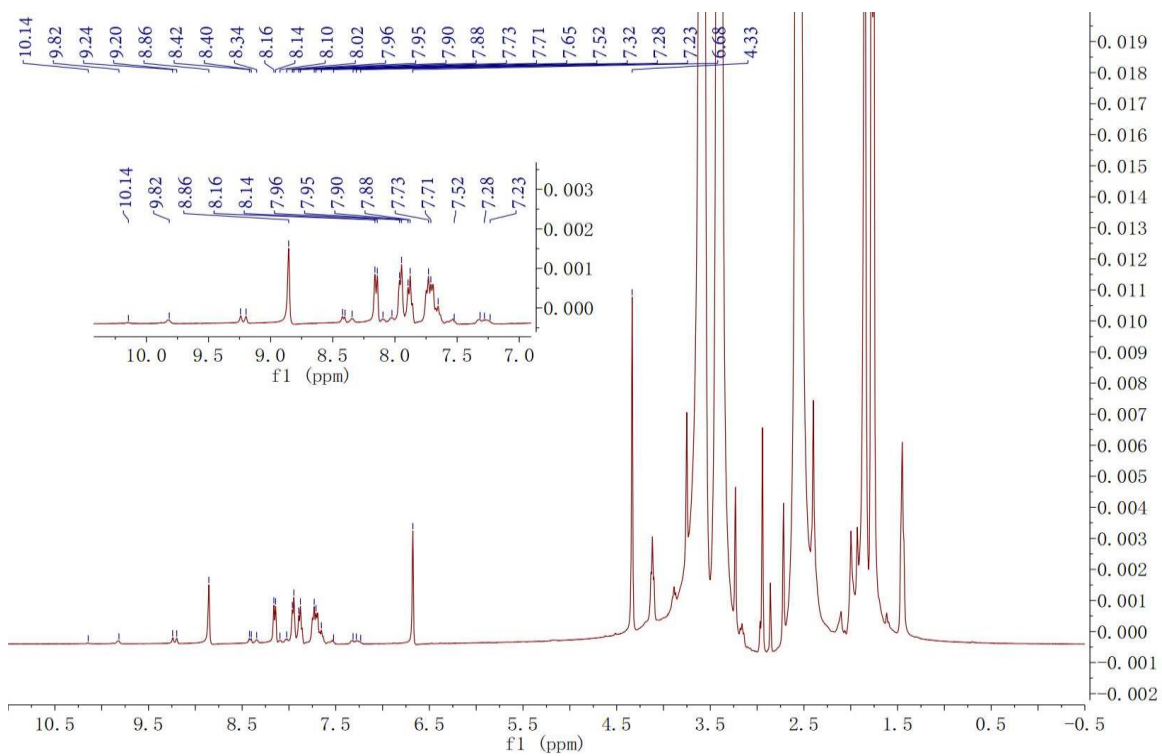

Full spectrum of Figure S1-b, <sup>1</sup>H-NMR (400 MHz, DMA)

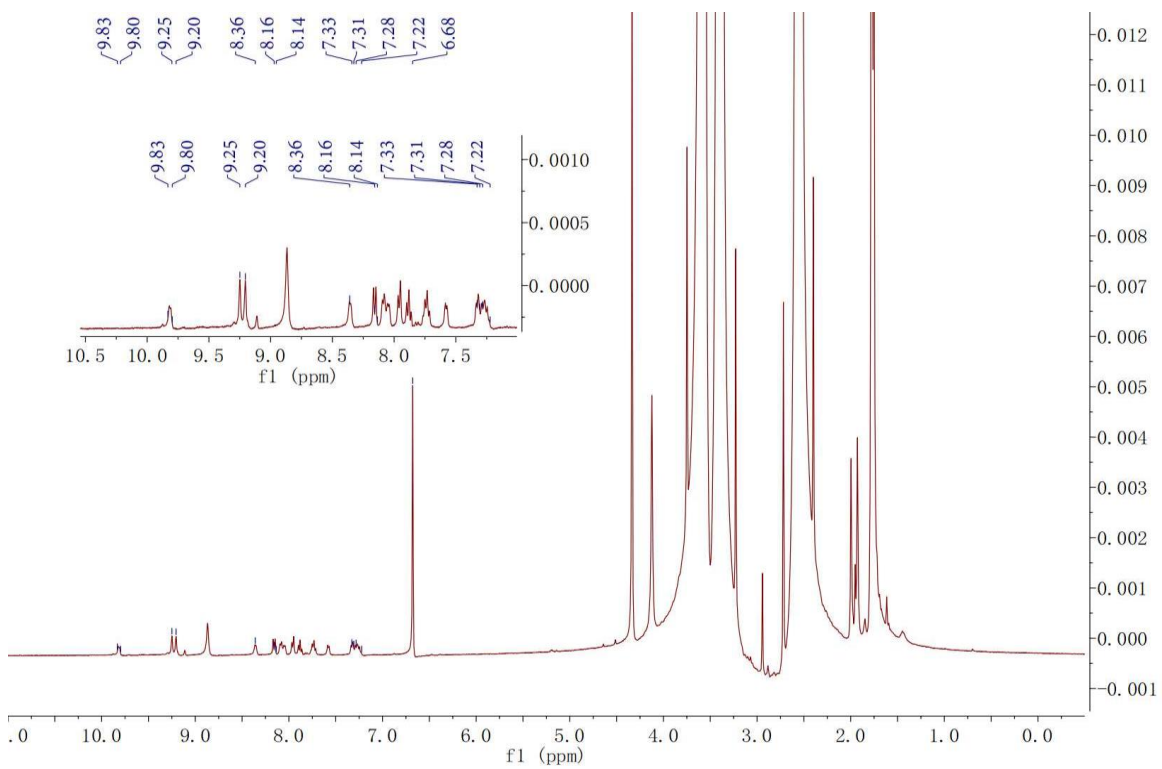



**Full spectrum of Figure S1-c, <sup>1</sup>H-NMR (400 MHz, DMA)**

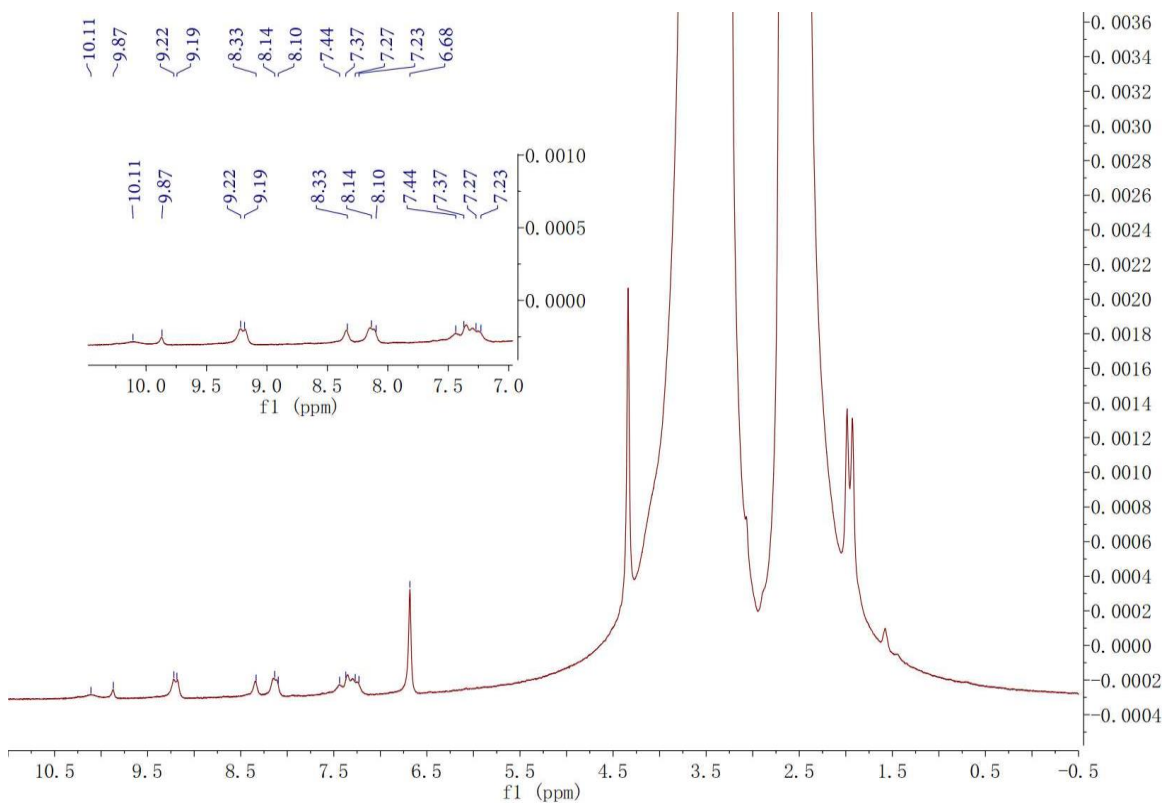

**Full spectrum of 1,3,5-triazine, <sup>1</sup>H-NMR (400 MHz, DMA)**

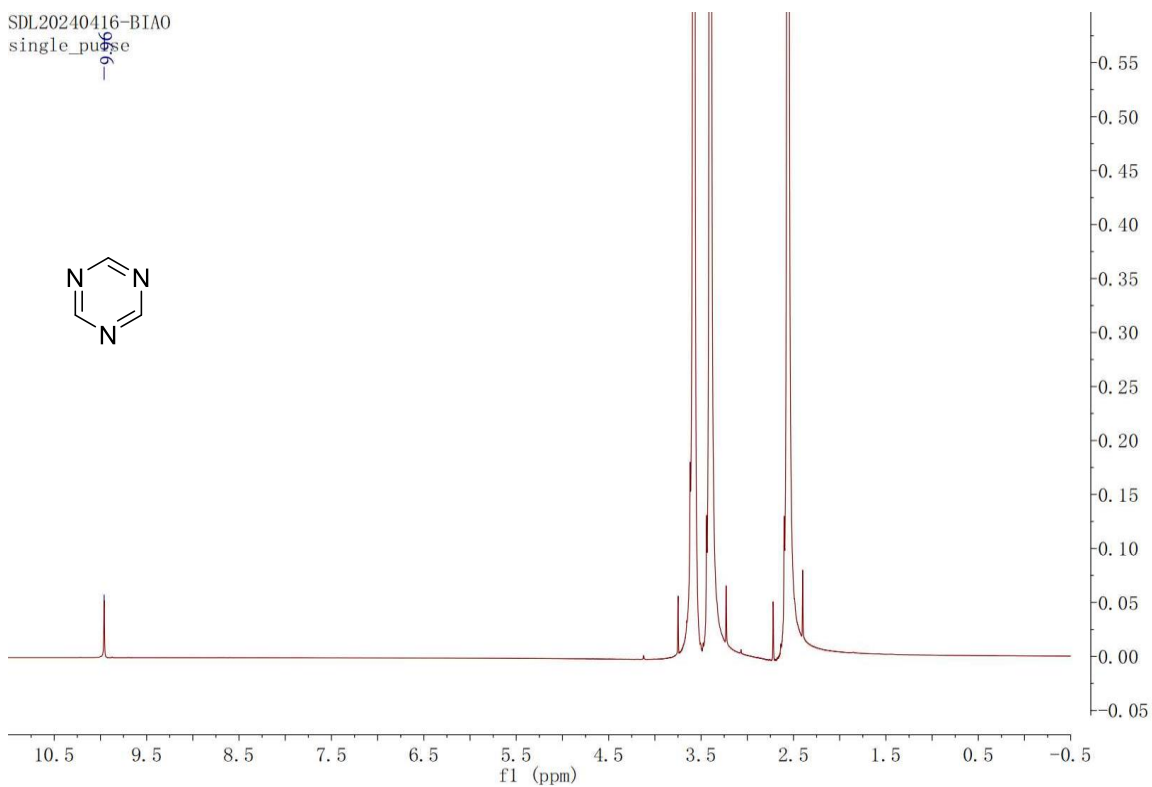

**Full spectrum of Figure S3, <sup>1</sup>H-NMR (with 1,3,5-triazine 400 MHz, DMA)**

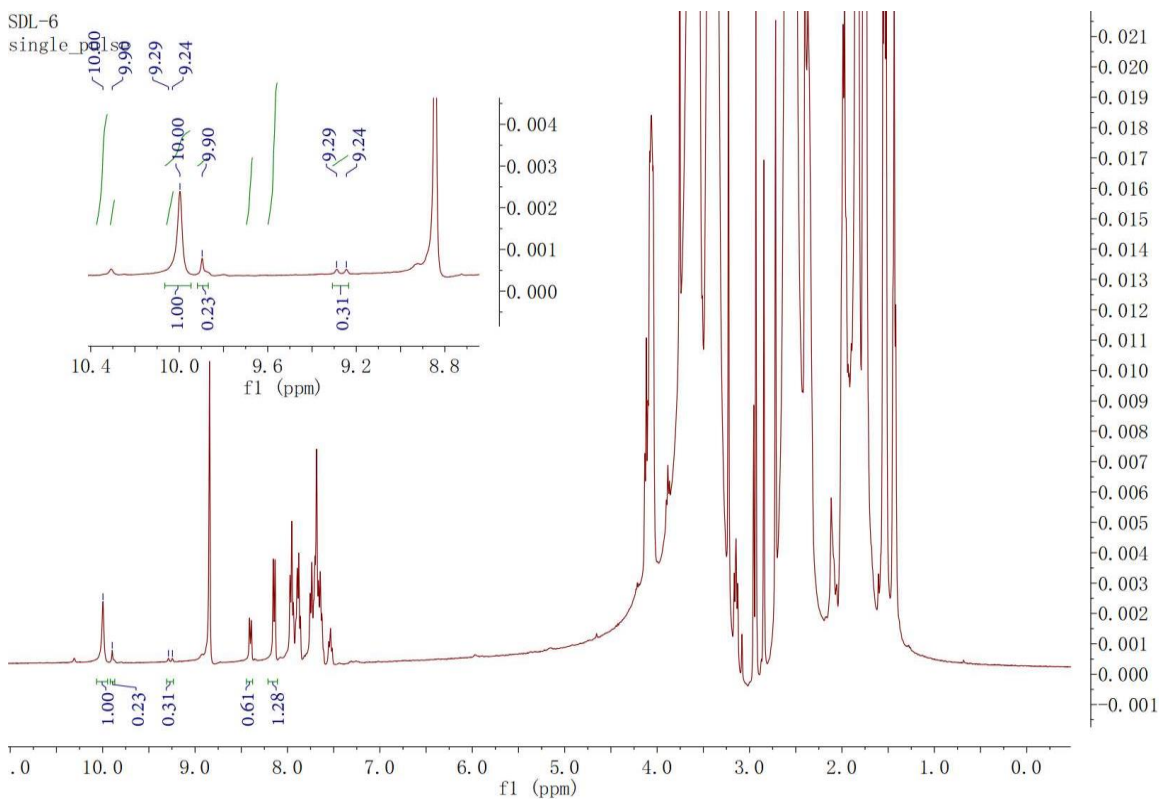

**Full spectrum of Figure S4, <sup>1</sup>H-NMR (with 1,3,5-triazine 400 MHz, DMA)**

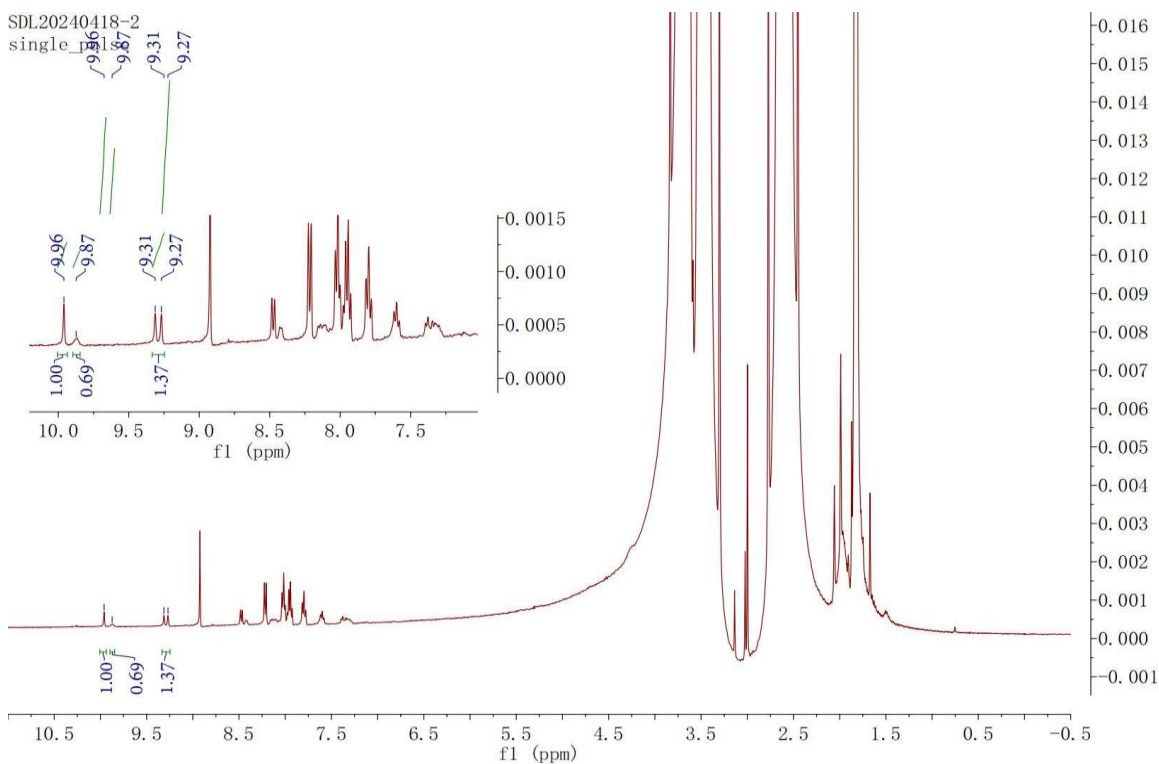

**Full spectrum of Figure S5-a, <sup>1</sup>H-NMR (400 MHz, DMA)**

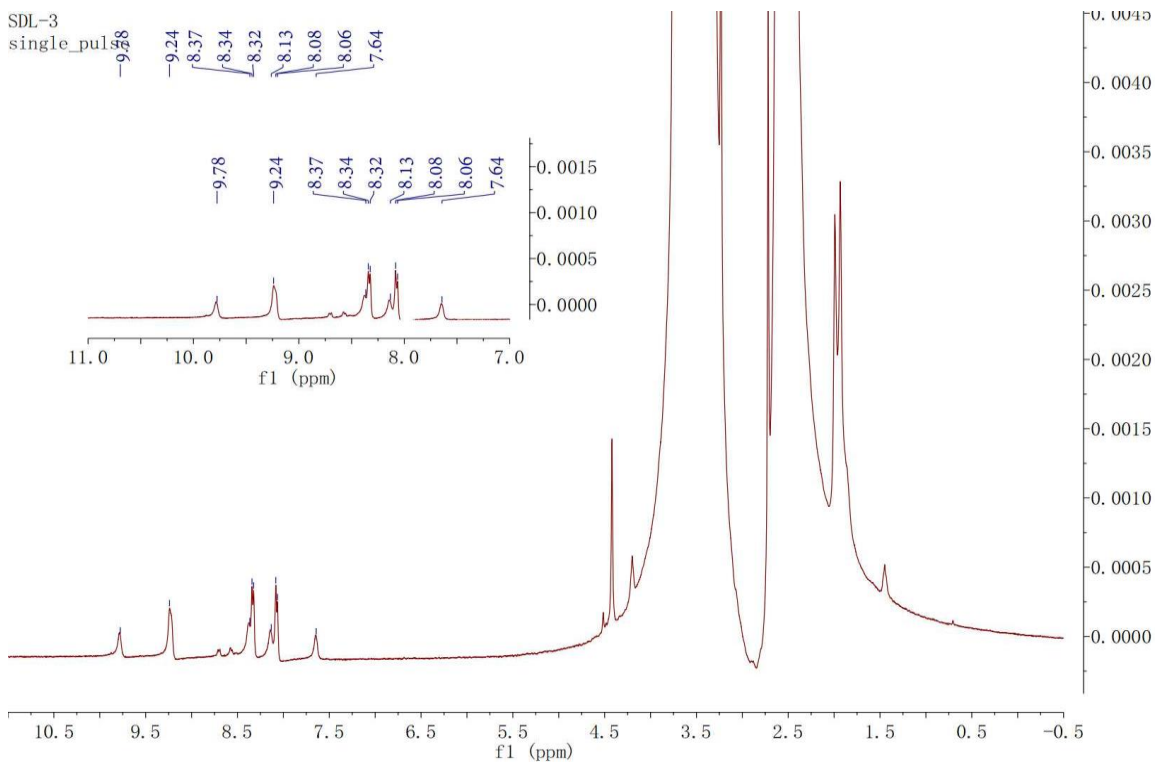

**Full spectrum of Figure S5-b, <sup>1</sup>H-NMR (400 MHz, DMA)**

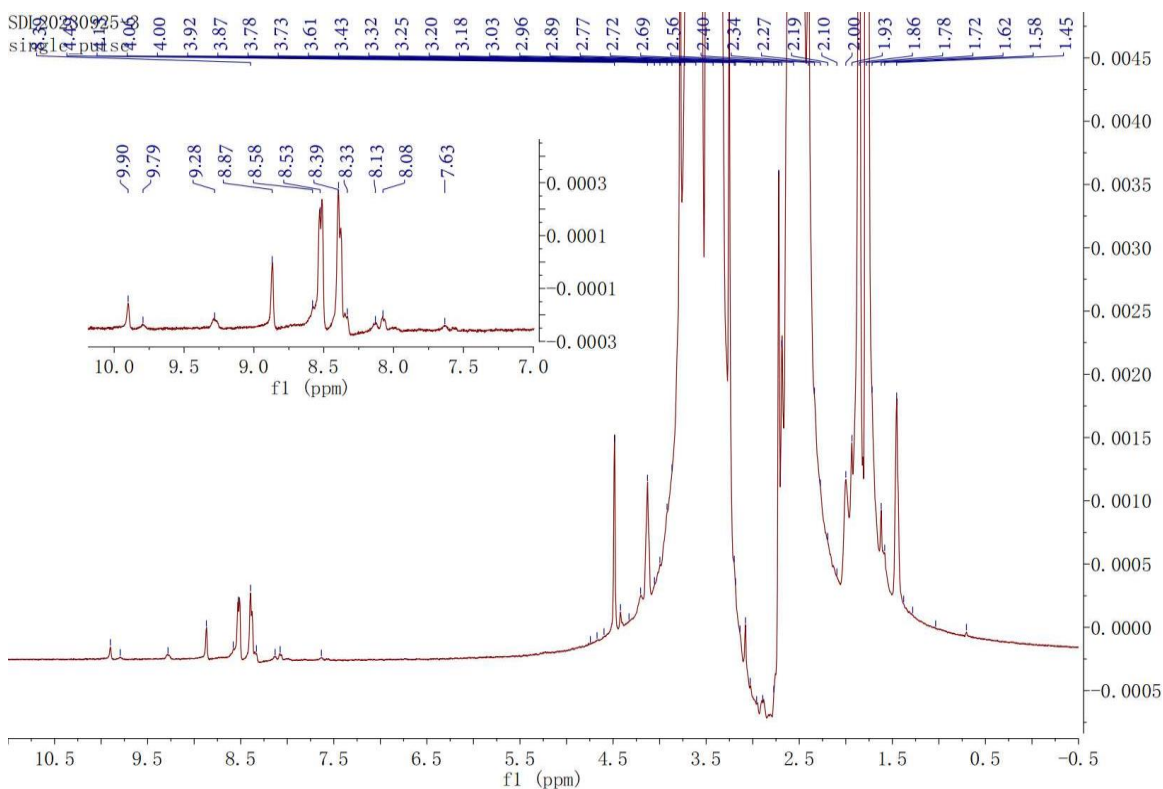

### Full spectrum of Figure S5-c, <sup>1</sup>H-NMR (400 MHz, DMA)

SDL2-231113-2  
single\_pulse

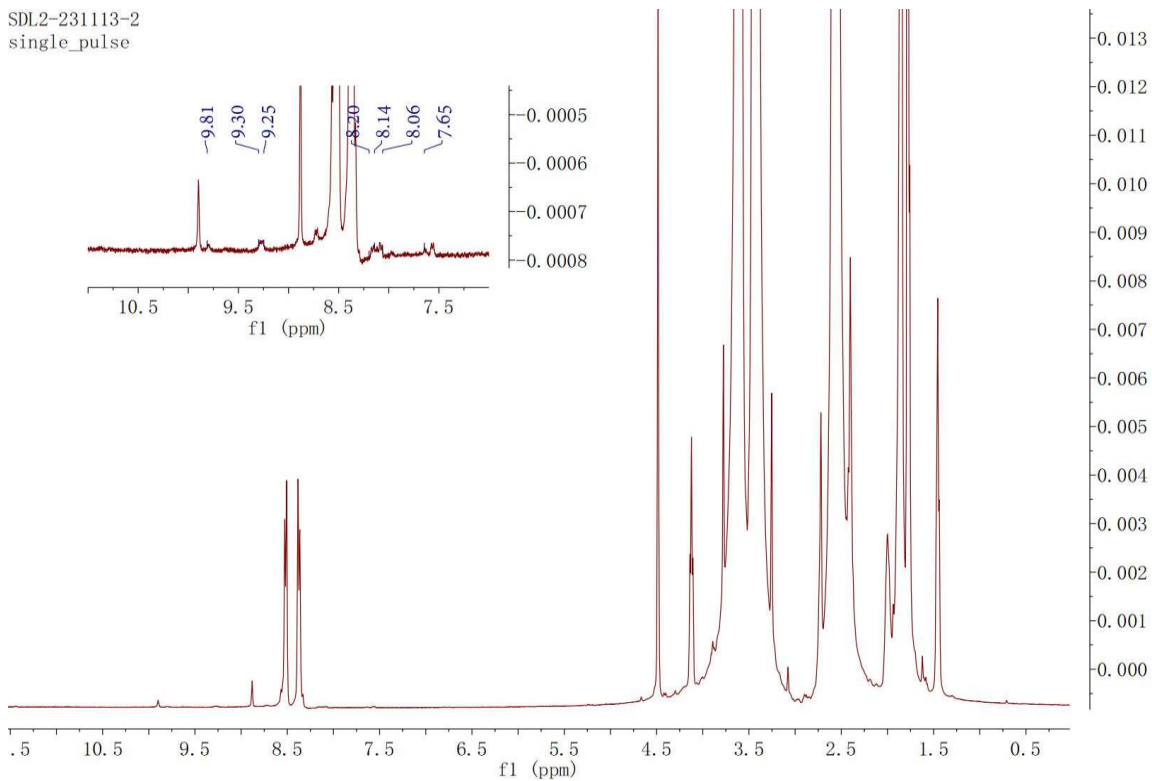

### Full spectrum of Figure S6-a, <sup>1</sup>H-NMR (400 MHz, DMA)

SDL20230718-145  
single\_pulse

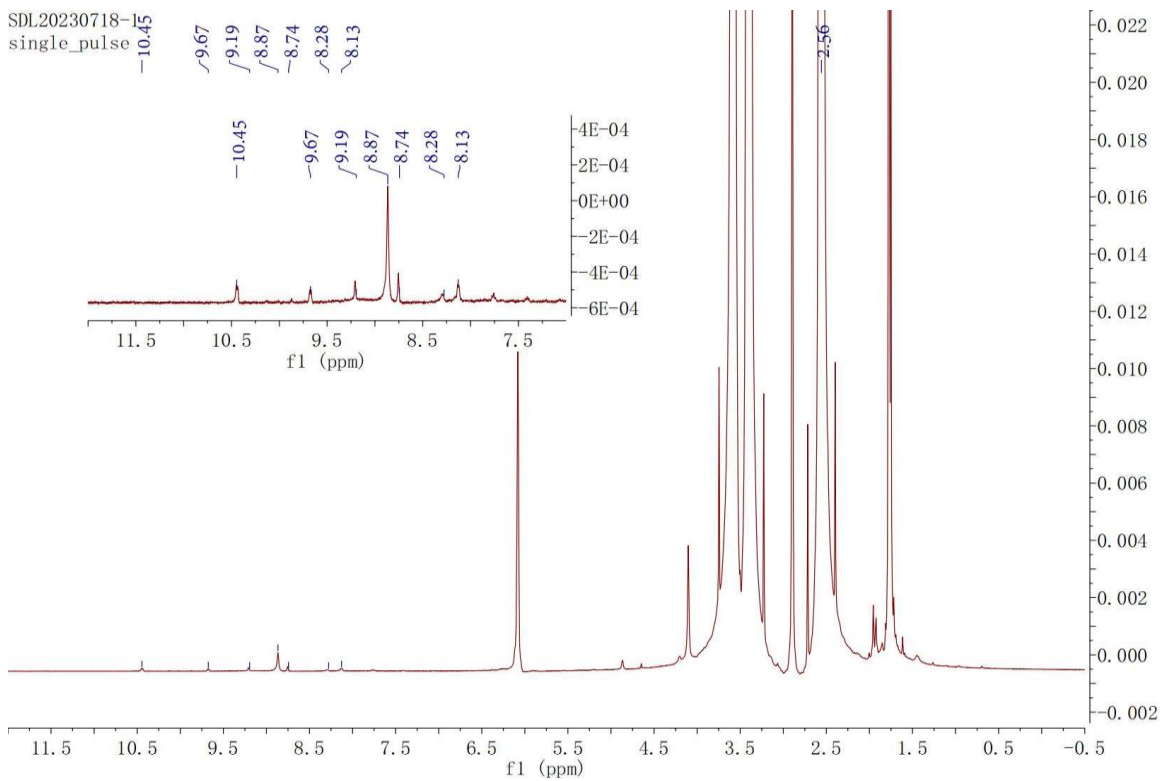

**Full spectrum of Figure S6-b, <sup>1</sup>H-NMR (400 MHz, DMA)**

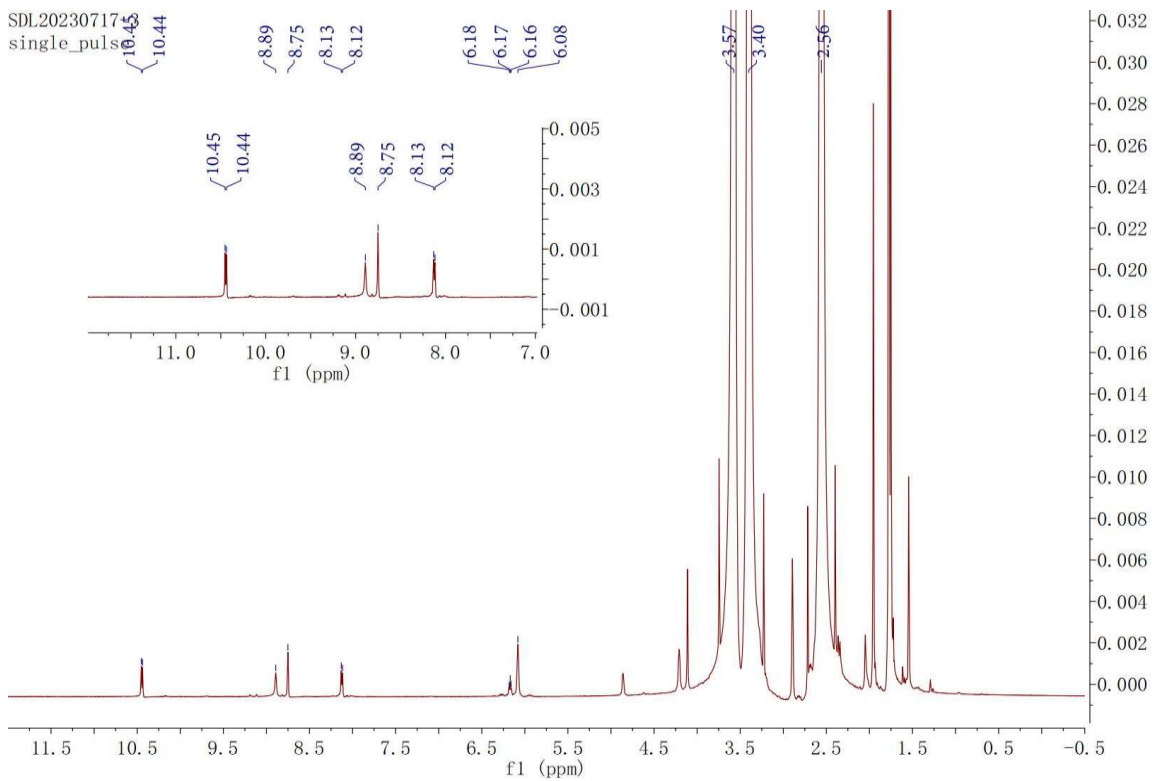

**Full spectrum of Figure S6-c, <sup>1</sup>H-NMR (400 MHz, DMA)**

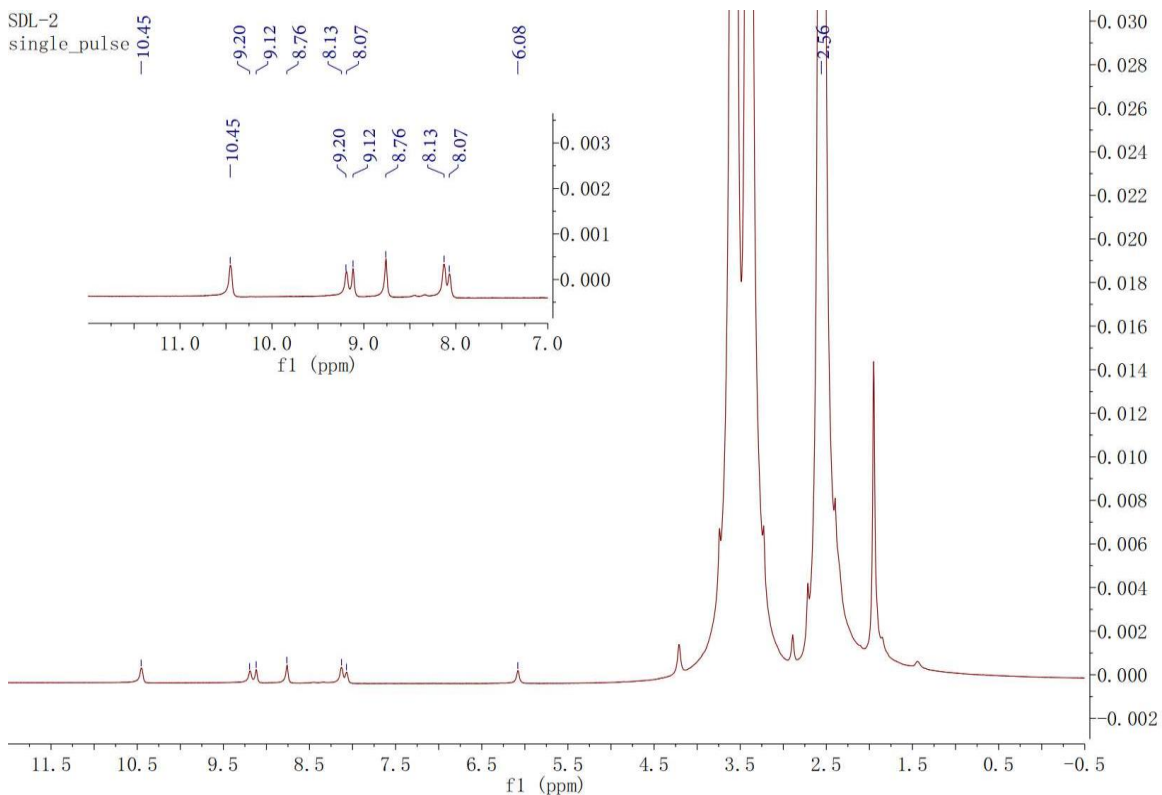

### Full spectrum of Figure S6-d, <sup>1</sup>H-NMR (400 MHz, DMA)

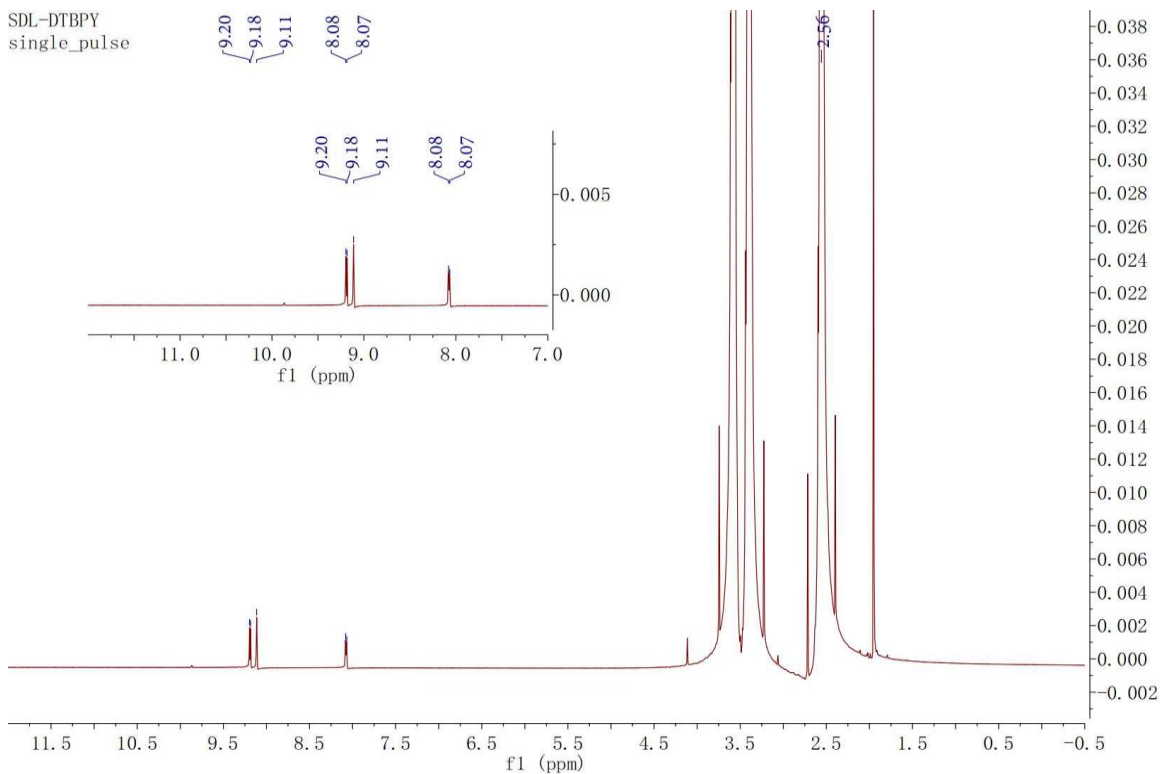

### Full spectrum of Figure S8-a, <sup>1</sup>H-NMR (400 MHz, DMA)

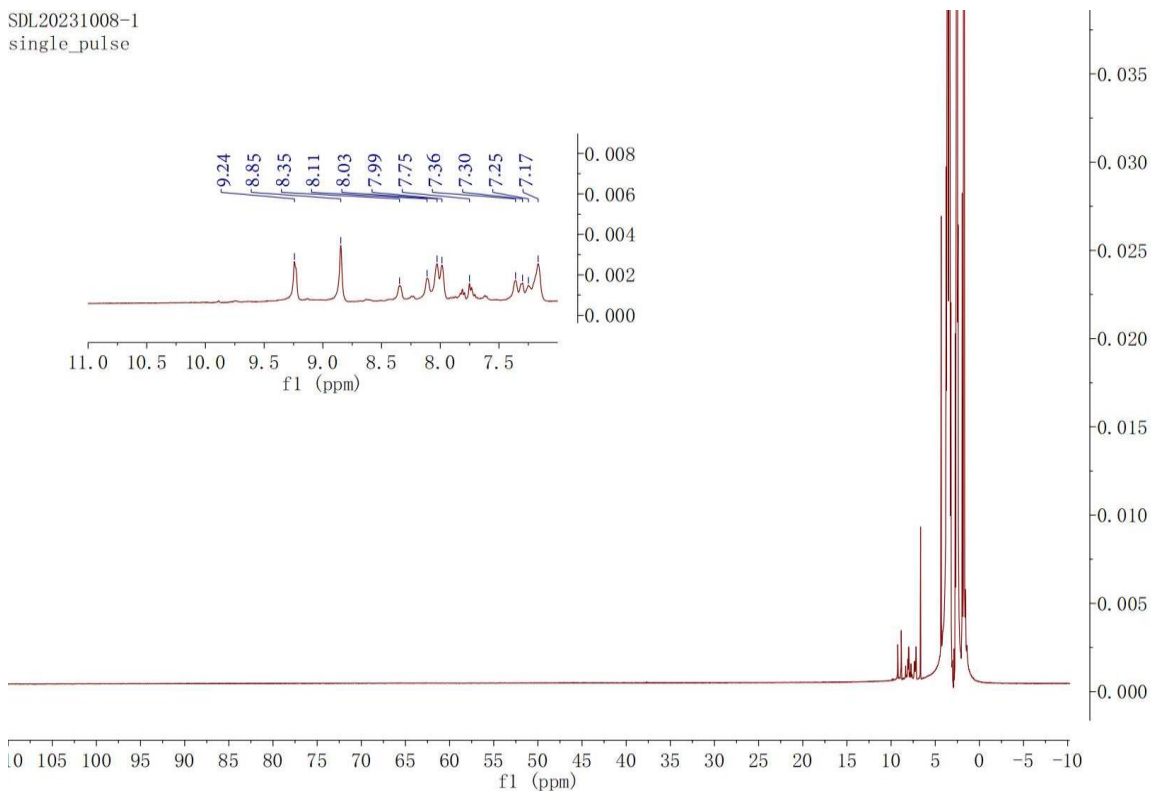



### Full spectrum of Figure S8-b, <sup>1</sup>H-NMR (400 MHz, DMA)

SDL20231008-2  
single\_pulse

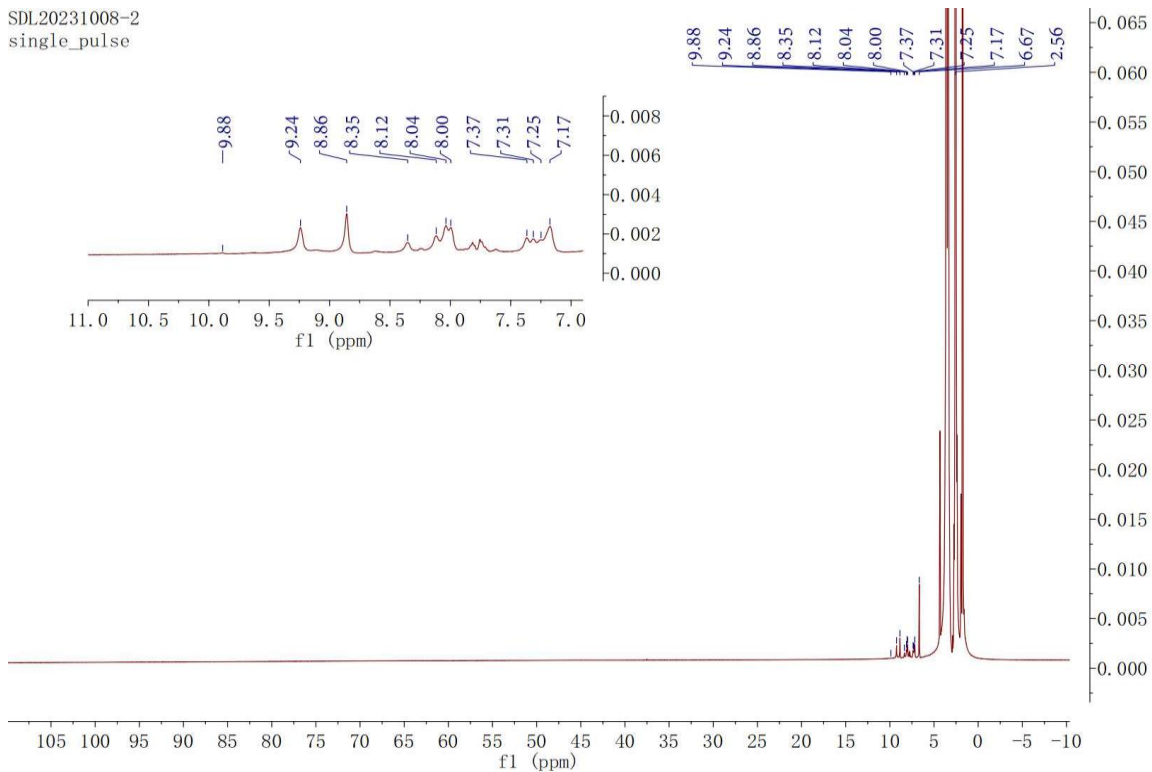

### Full spectrum of Figure S8-c, <sup>1</sup>H-NMR (400 MHz, DMA)

SDL20231007-1DMA  
single\_pulse

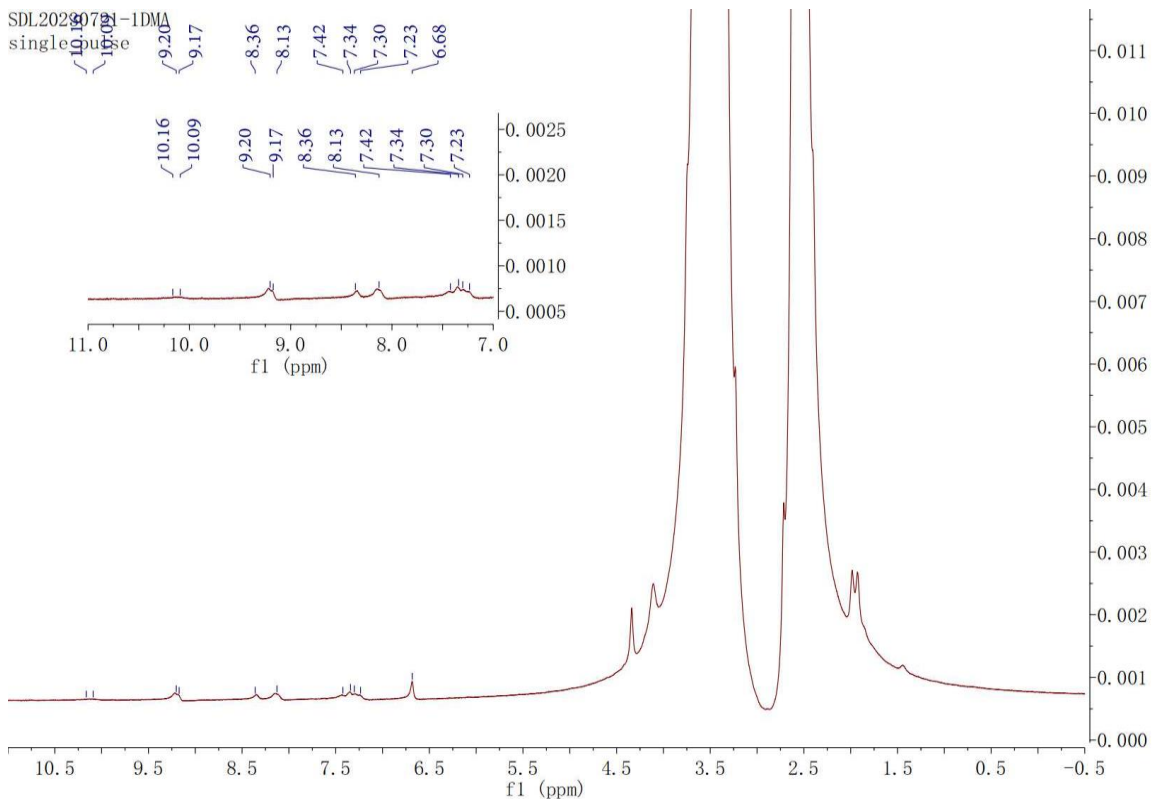

Supplement: ADVS-11-2404301-s001.pdf [file ADVS-11-2404301-s001.pdf]
